# Supplementary material
Source: MDPI journal article supplement (https://www.mdpi.com/1999-4907/10/3/225)

Sample 1: 01\_A01.fsa    Run date and time: 09/22/2017 - 14:52:02 -> 09/22/2017 - 15:34:31

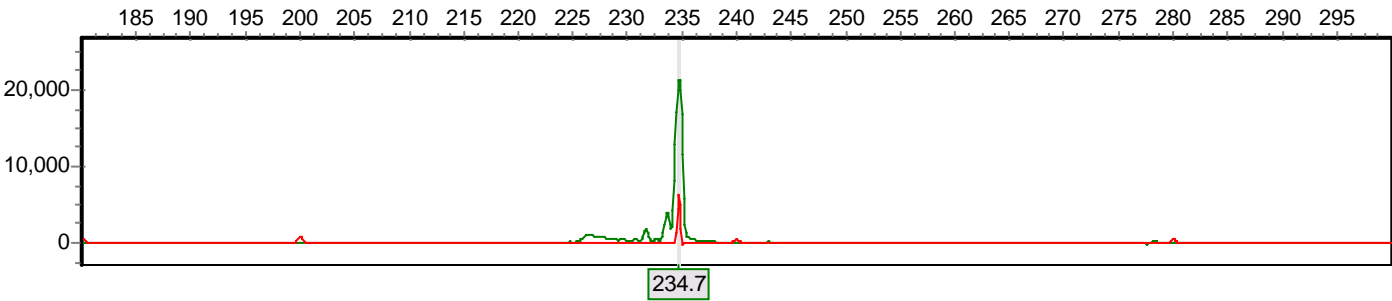

Sample 2: 02\_B01.fsa    Run date and time: 09/22/2017 - 14:52:02 -> 09/22/2017 - 15:34:31

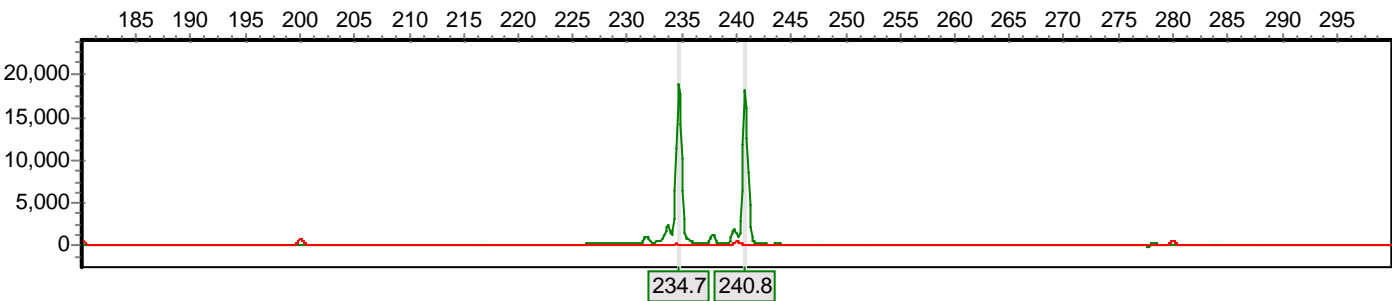

Sample 3: 03\_C01.fsa    Run date and time: 09/22/2017 - 14:52:02 -> 09/22/2017 - 15:34:31

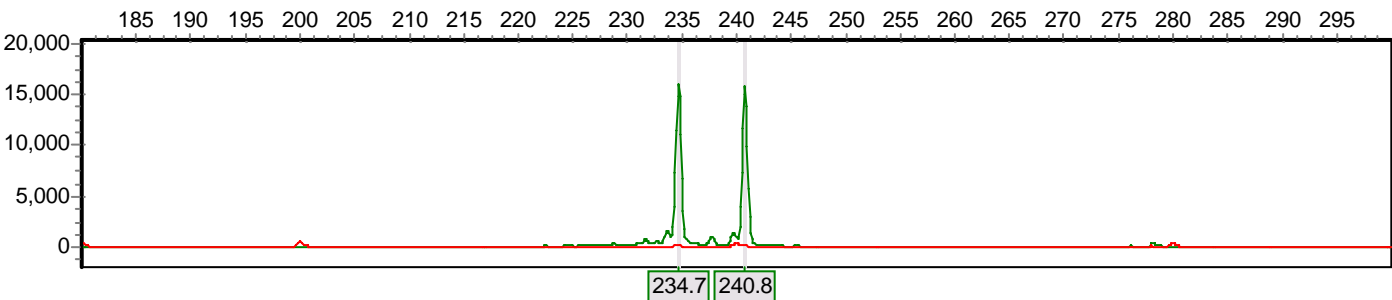

Sample 4: 04\_D01.fsa    Run date and time: 09/22/2017 - 14:52:02 -> 09/22/2017 - 15:34:31

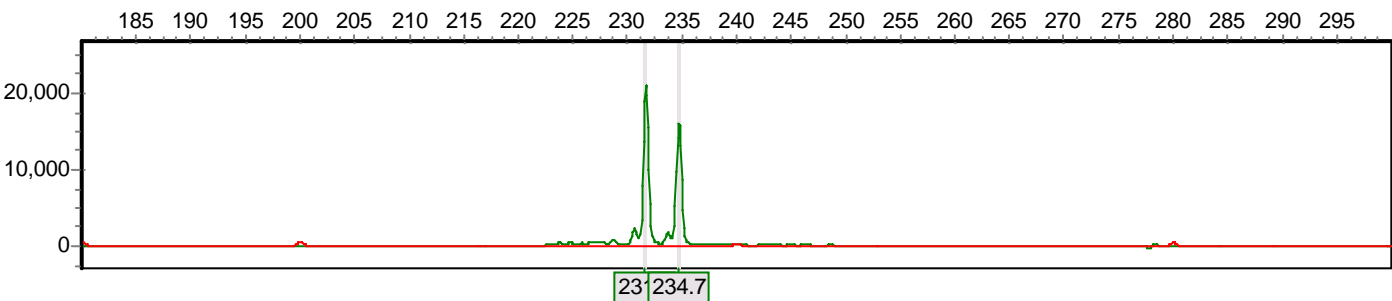

Sample 5: 05\_E01.fsa    Run date and time: 09/22/2017 - 14:52:02 -> 09/22/2017 - 15:34:31

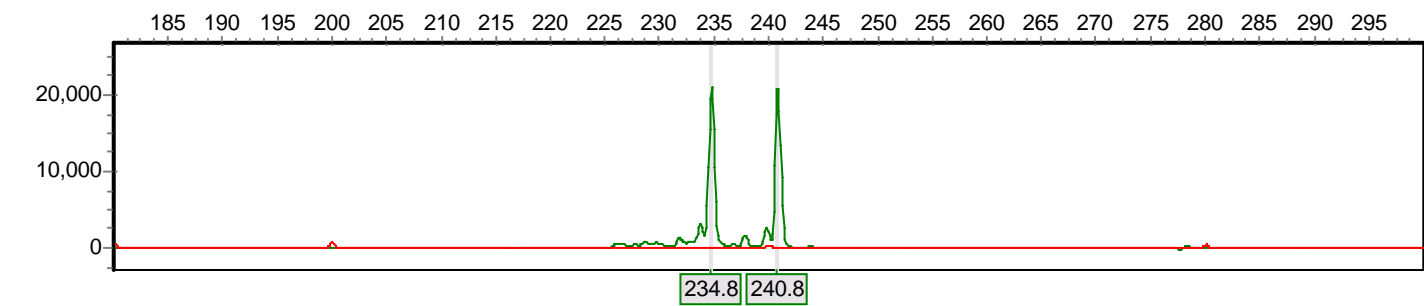

Sample 6: 06\_F01.fsa    Run date and time: 09/22/2017 - 14:52:02 -> 09/22/2017 - 15:34:31

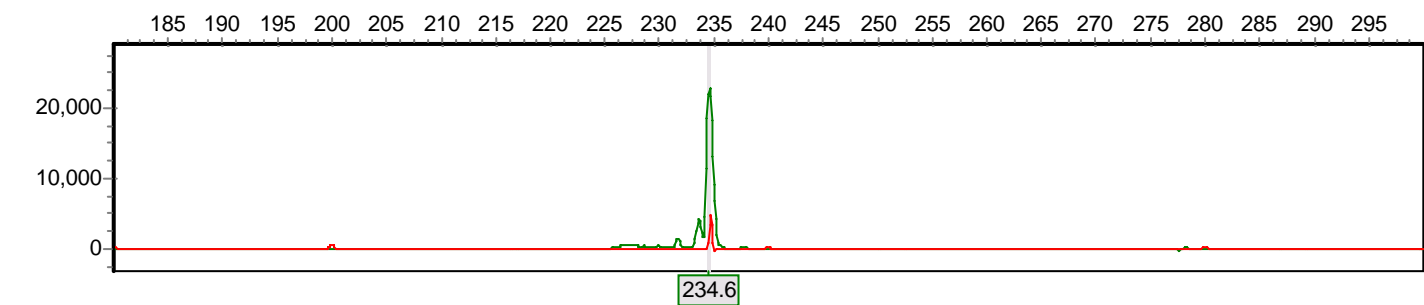

Sample 7: 07\_G01.fsa    Run date and time: 09/22/2017 - 14:52:02 -> 09/22/2017 - 15:34:31

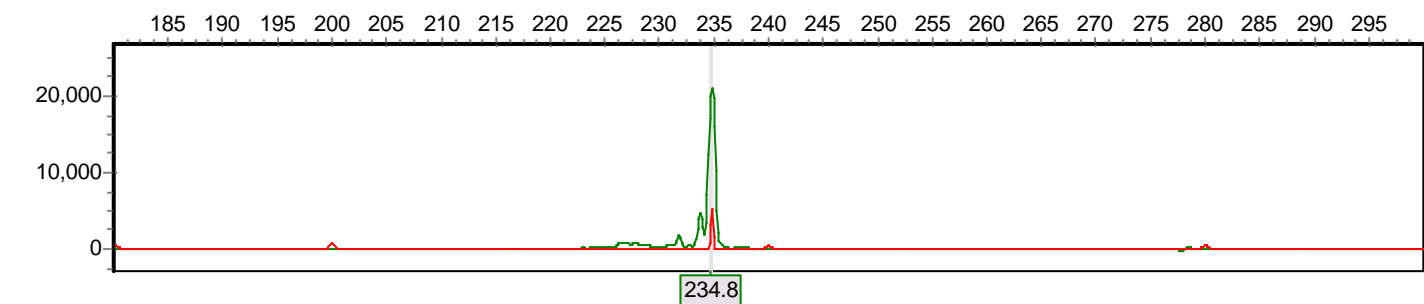

Sample 8: 08\_H01.fsa    Run date and time: 09/22/2017 - 14:52:02 -> 09/22/2017 - 15:34:31

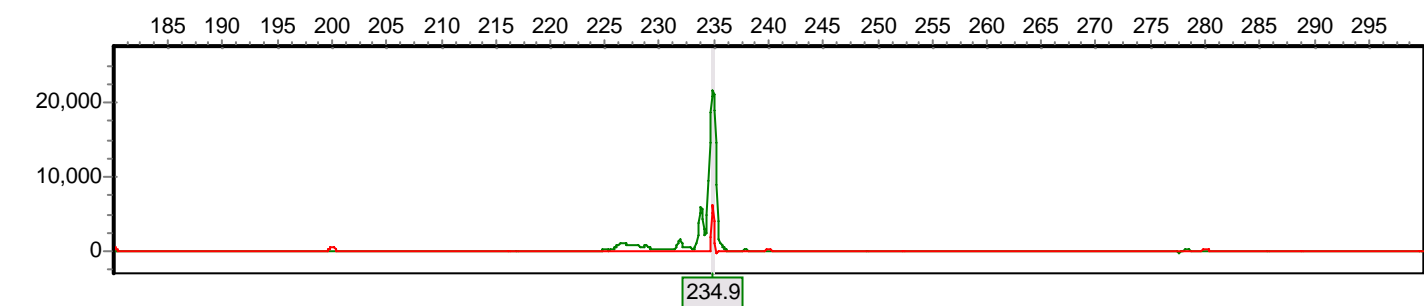

Sample 9: 09\_A02.fsa    Run date and time: 09/22/2017 - 14:52:02 -> 09/22/2017 - 15:34:31

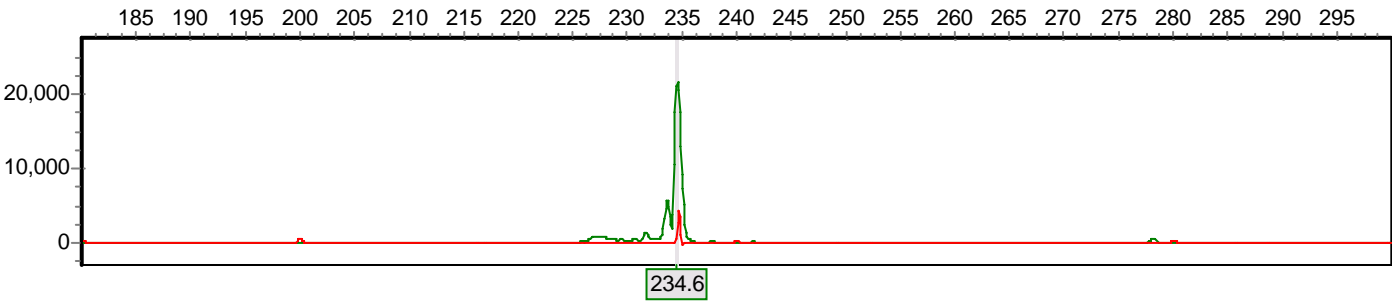

Sample 10: 10\_B02.fsa    Run date and time: 09/22/2017 - 14:52:02 -> 09/22/2017 - 15:34:31

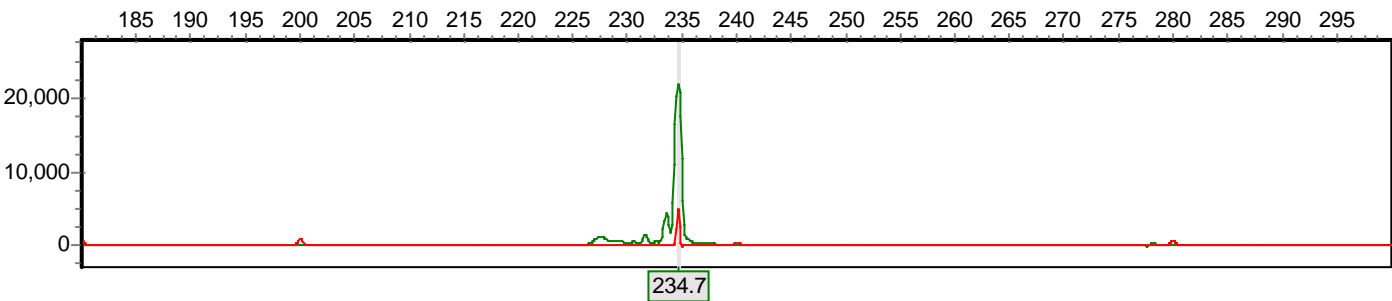

Sample 11: 11\_C02.fsa    Run date and time: 09/22/2017 - 14:52:02 -> 09/22/2017 - 15:34:31

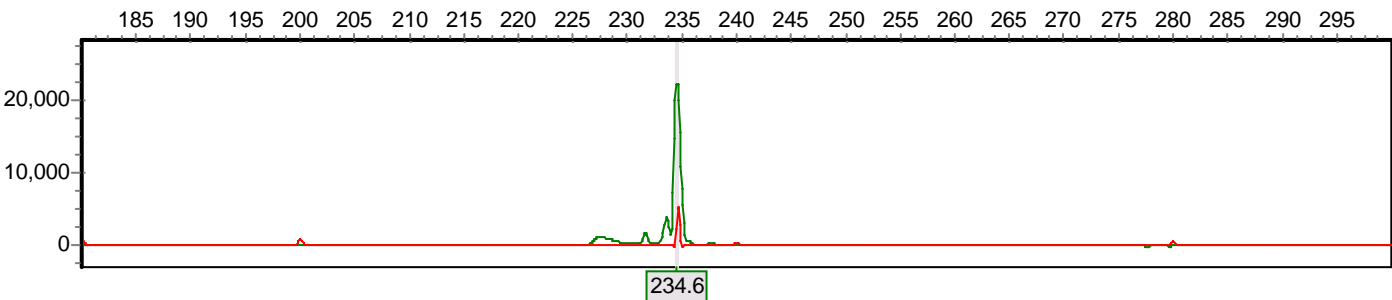

Sample 12: 12\_D02.fsa    Run date and time: 09/22/2017 - 14:52:02 -> 09/22/2017 - 15:34:31

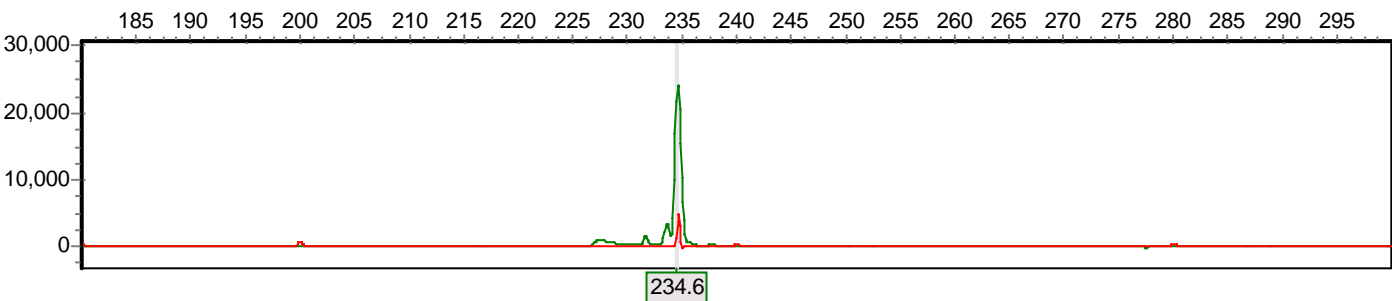

Sample 13: 13\_E02.fsa    Run date and time: 09/22/2017 - 14:52:02 -> 09/22/2017 - 15:34:31

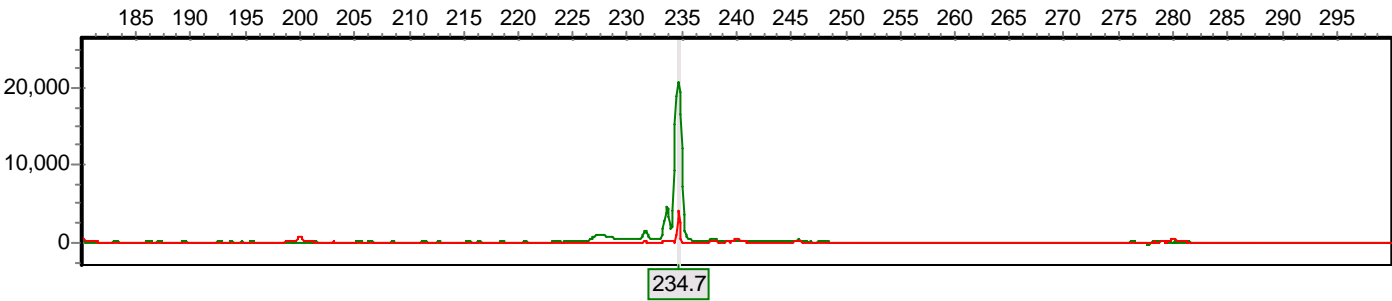

Sample 14: 14\_F02.fsa    Run date and time: 09/22/2017 - 14:52:02 -> 09/22/2017 - 15:34:31

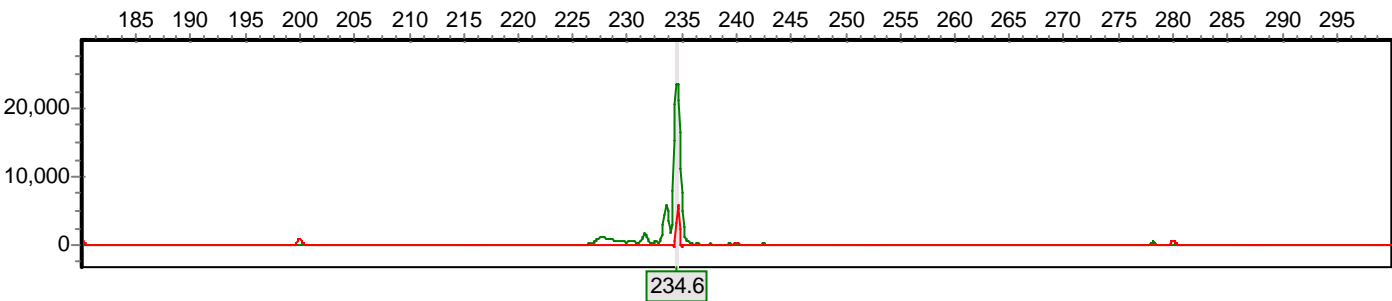

Sample 15: 15\_G02.fsa    Run date and time: 09/22/2017 - 14:52:02 -> 09/22/2017 - 15:34:31

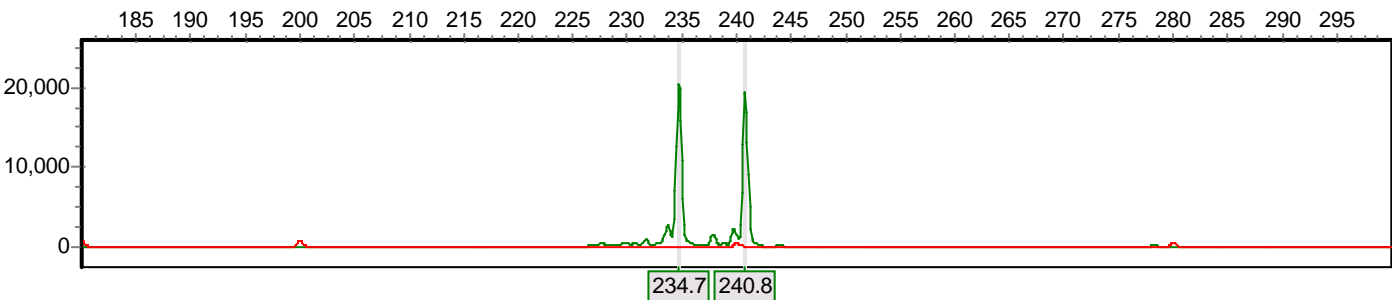

Sample 16: 16\_H02.fsa    Run date and time: 09/22/2017 - 14:52:02 -> 09/22/2017 - 15:34:31

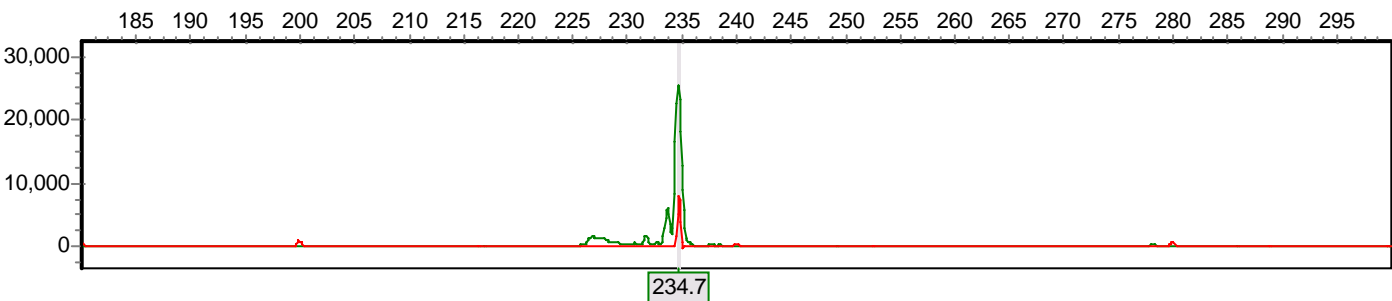

Sample 17: 17\_A03.fsa    Run date and time: 09/22/2017 - 14:52:02 -> 09/22/2017 - 15:34:31

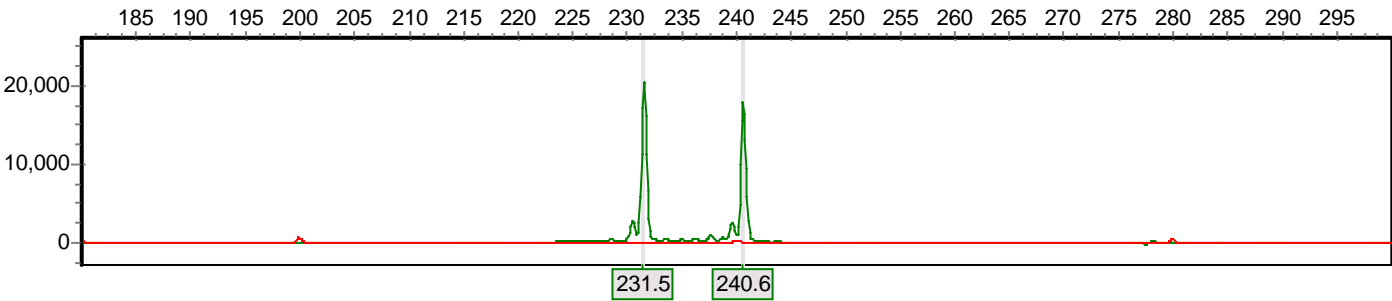

Sample 18: 18\_B03.fsa    Run date and time: 09/22/2017 - 14:52:02 -> 09/22/2017 - 15:34:31

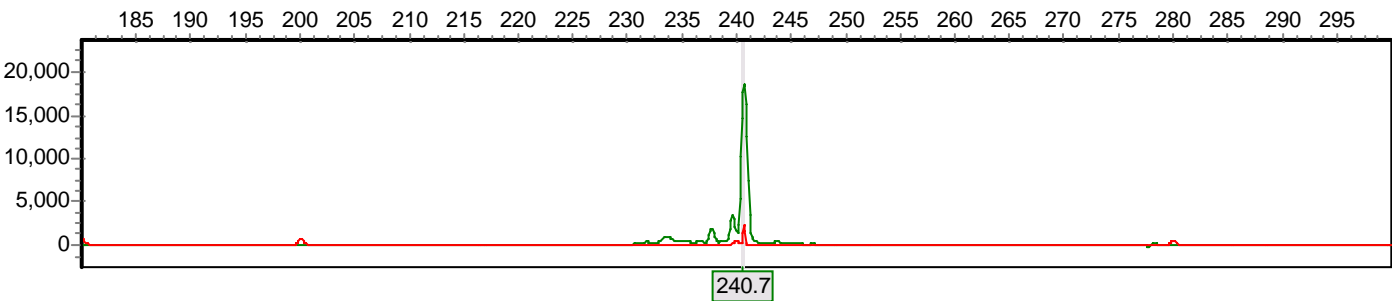

Sample 19: 19\_C03.fsa    Run date and time: 09/22/2017 - 14:52:02 -> 09/22/2017 - 15:34:31

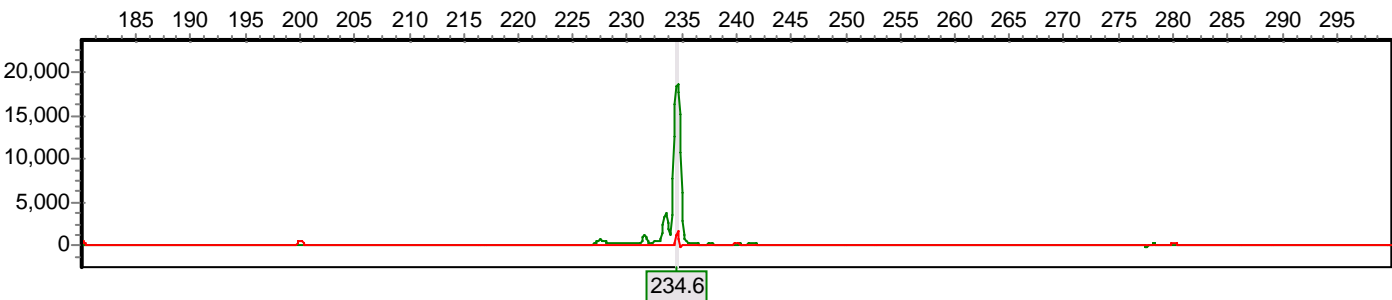

Sample 20: 20\_D03.fsa    Run date and time: 09/22/2017 - 14:52:02 -> 09/22/2017 - 15:34:31

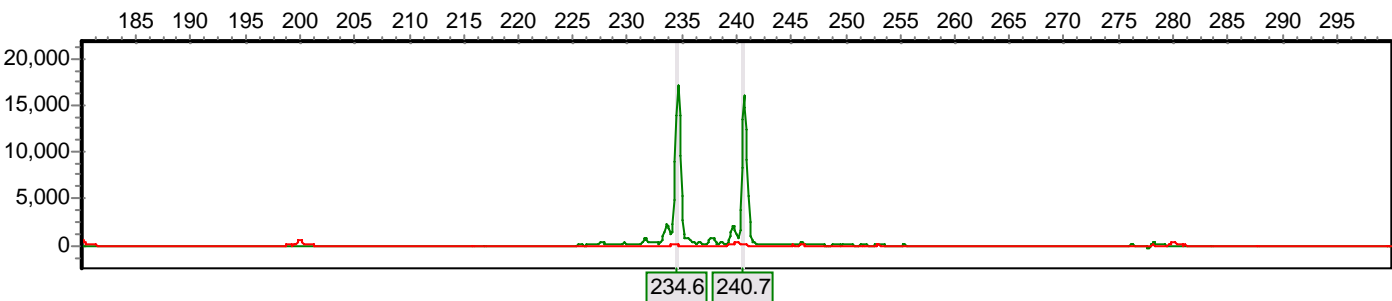

**Sample 21:** 21\_E03.fsa Run date and time: 09/22/2017 - 14:52:02 -> 09/22/2017 - 15:34:31

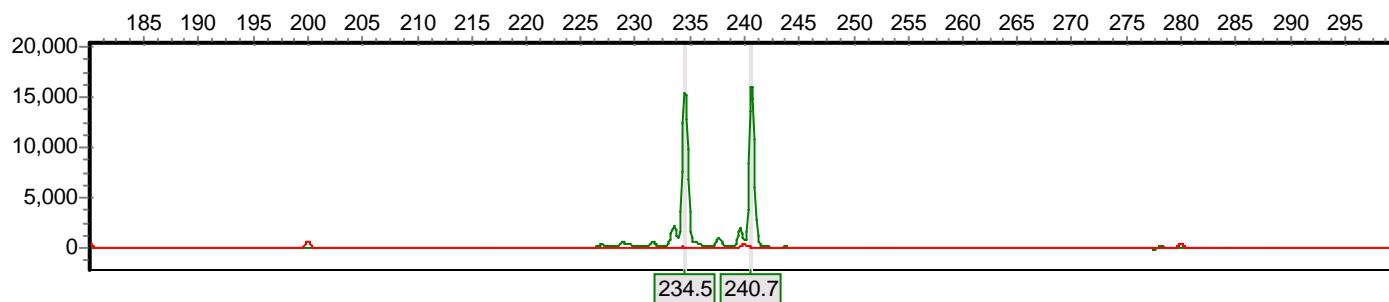

**Sample 22** 22\_F03.fsa Run date and time: 09/22/2017 - 14:52:02 -> 09/22/2017 - 15:34:31

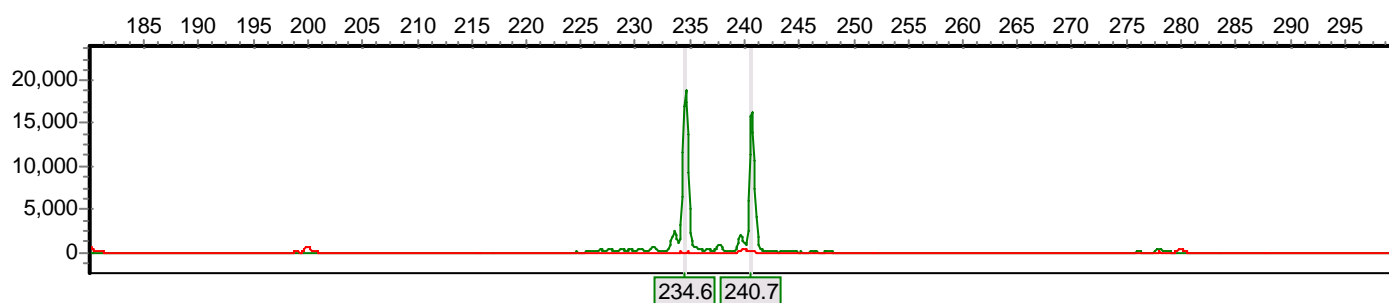

**Sample 23** 23\_G03.fsa Run date and time: 09/22/2017 - 14:52:02 -> 09/22/2017 - 15:34:31

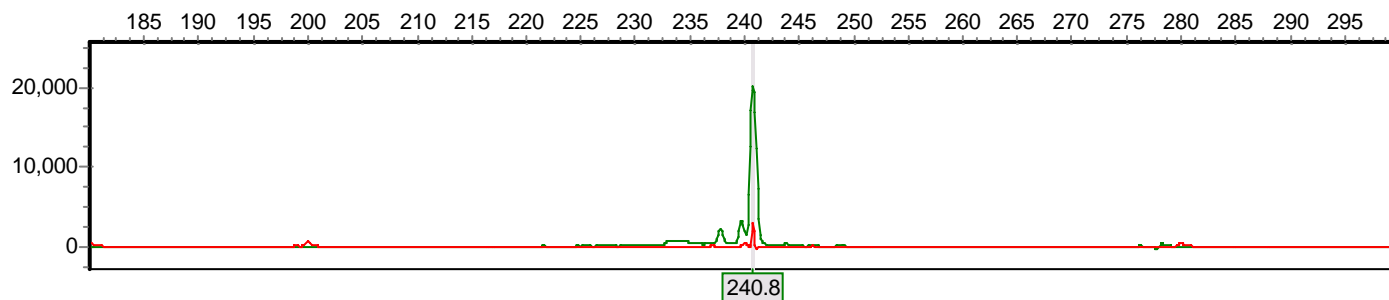

**Sample 24** 24\_H03.fsa Run date and time: 09/22/2017 - 14:52:02 -> 09/22/2017 - 15:34:31

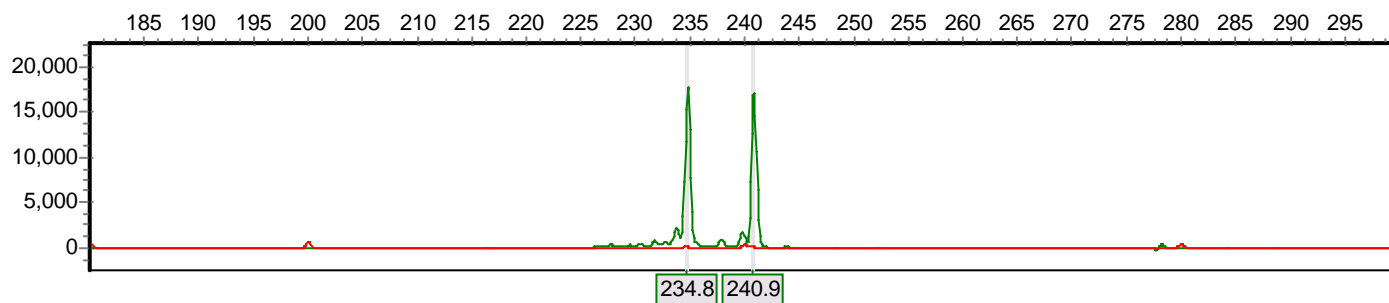

**Sample 25:** 25\_A04.fsa Run date and time: 09/22/2017 - 14:52:02 -> 09/22/2017 - 15:34:31

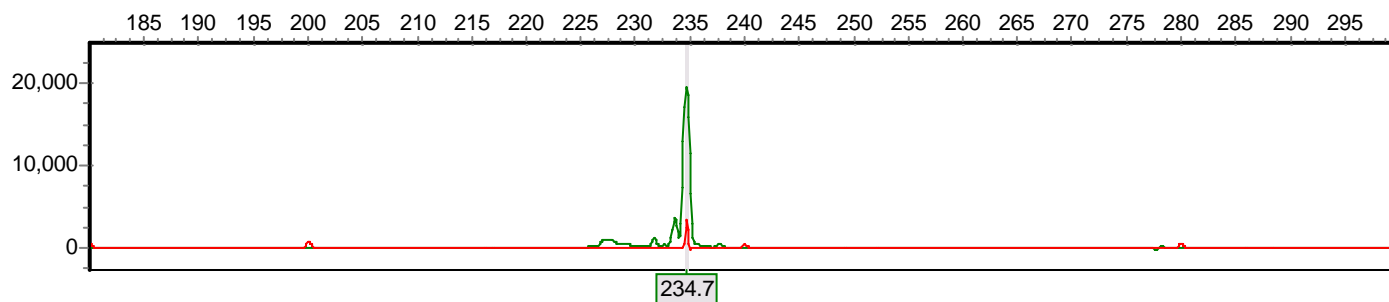

**Sample 26** 26\_B04.fsa Run date and time: 09/22/2017 - 14:52:02 -> 09/22/2017 - 15:34:31

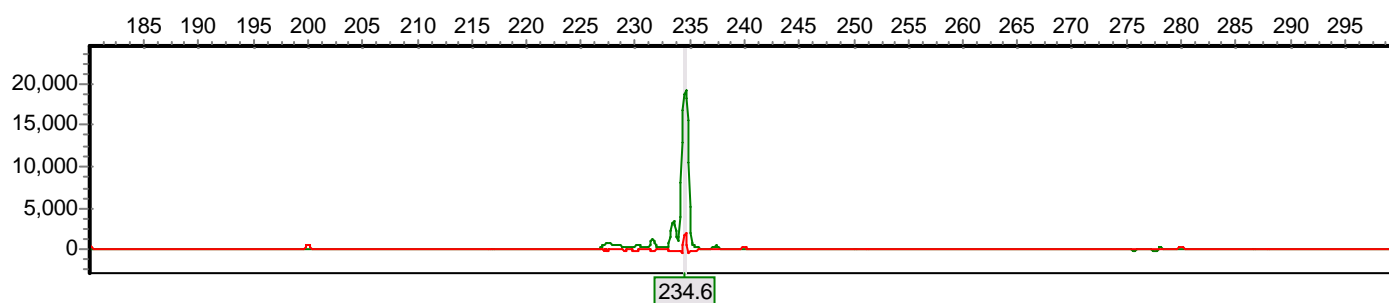

**Sample 27** 27\_C04.fsa Run date and time: 09/22/2017 - 14:52:02 -> 09/22/2017 - 15:34:31

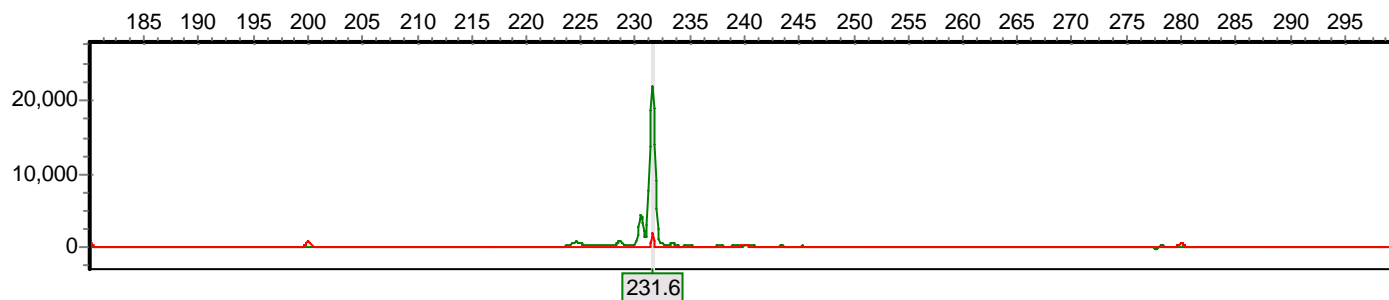

**Sample 28** 28\_D04.fsa Run date and time: 09/22/2017 - 14:52:02 -> 09/22/2017 - 15:34:31

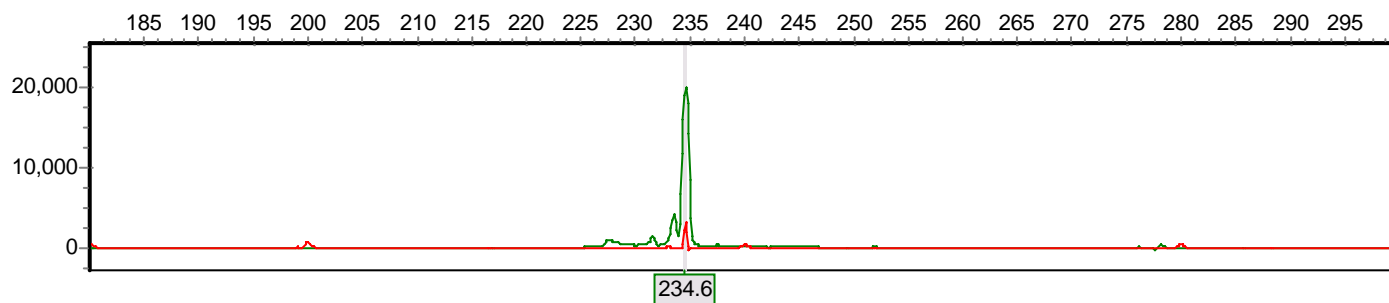

**Sample 29:** 29\_E04.fsa Run date and time: 09/22/2017 - 14:52:02 -> 09/22/2017 - 15:34:31

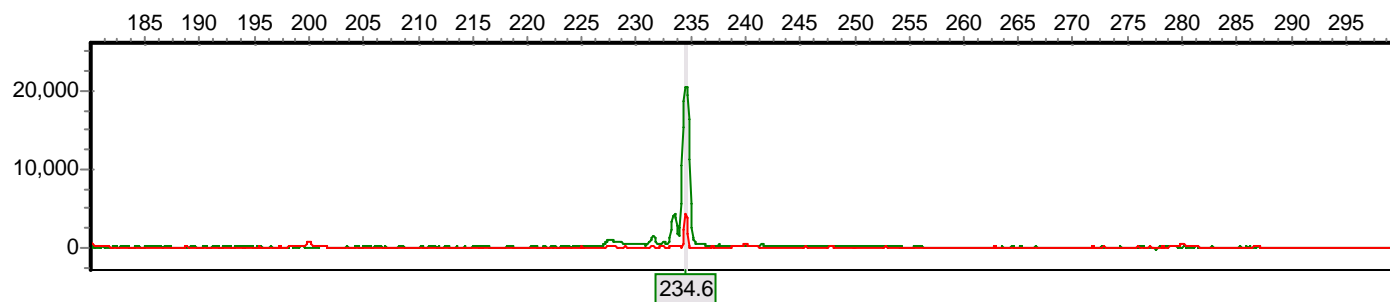

**Sample 30** 30\_F04.fsa Run date and time: 09/22/2017 - 14:52:02 -> 09/22/2017 - 15:34:31

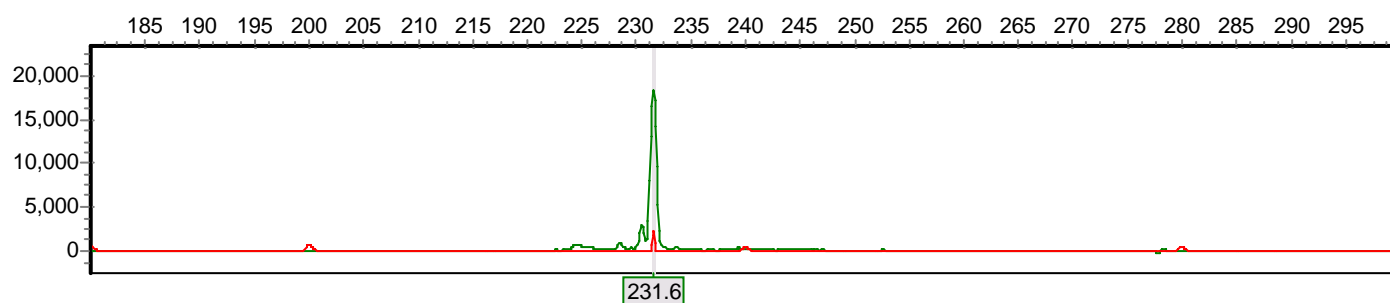

**Sample 31** 31\_G04.fsa Run date and time: 09/22/2017 - 14:52:02 -> 09/22/2017 - 15:34:31

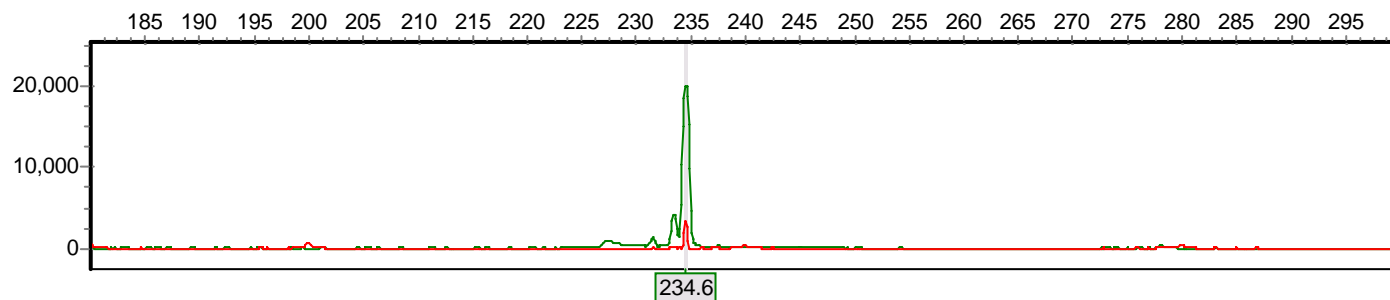

**Sample 32** 32\_H04.fsa Run date and time: 09/22/2017 - 14:52:02 -> 09/22/2017 - 15:34:31

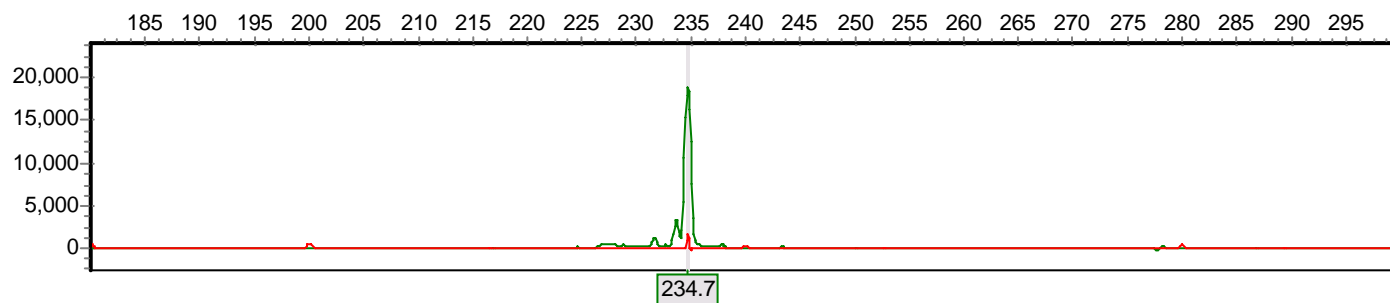



**Sample 33:** 33\_A05.fsa Run date and time: 09/22/2017 - 14:52:02 -> 09/22/2017 - 15:34:31

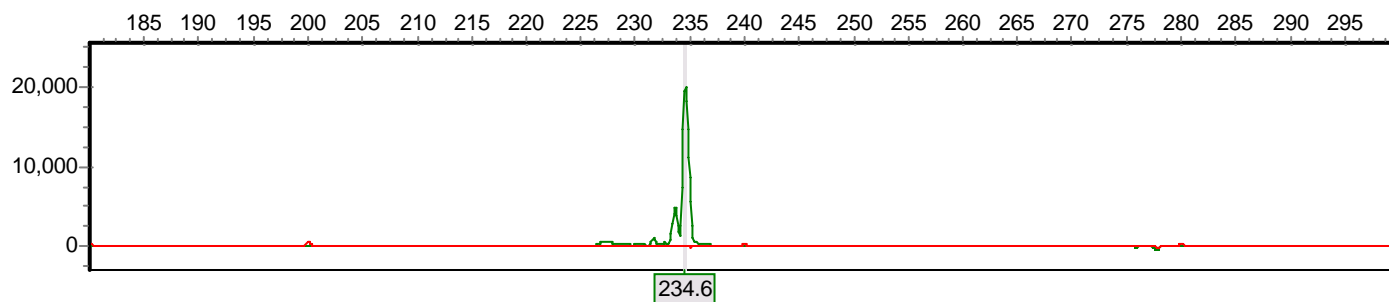

**Sample 34:** 34\_B05.fsa Run date and time: 09/22/2017 - 14:52:02 -> 09/22/2017 - 15:34:31

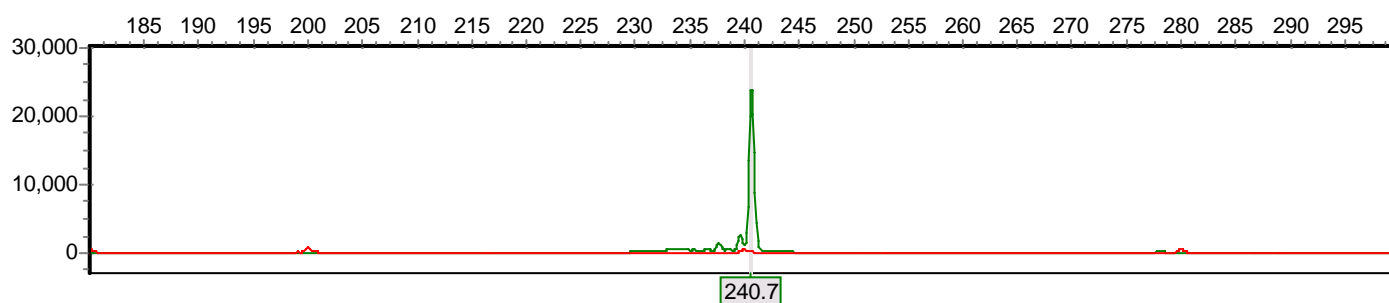

**Sample 35:** 35\_C05.fsa Run date and time: 09/22/2017 - 14:52:02 -> 09/22/2017 - 15:34:31

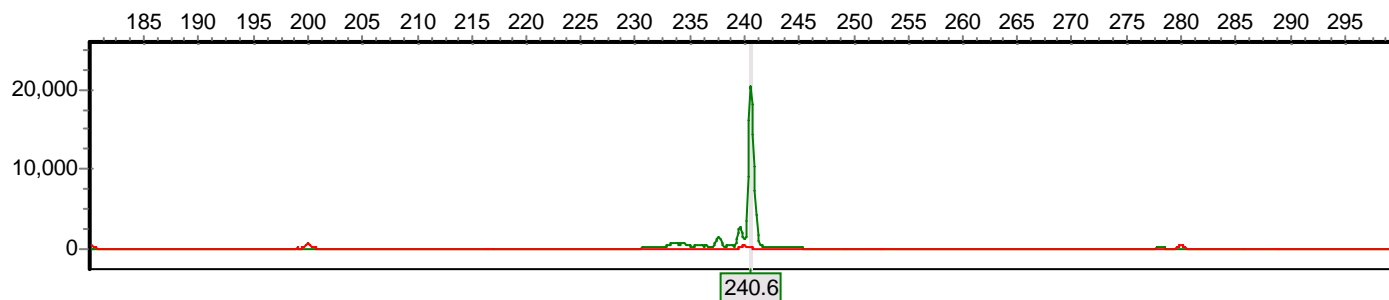

**Sample 36:** 36\_D05.fsa Run date and time: 09/22/2017 - 14:52:02 -> 09/22/2017 - 15:34:31

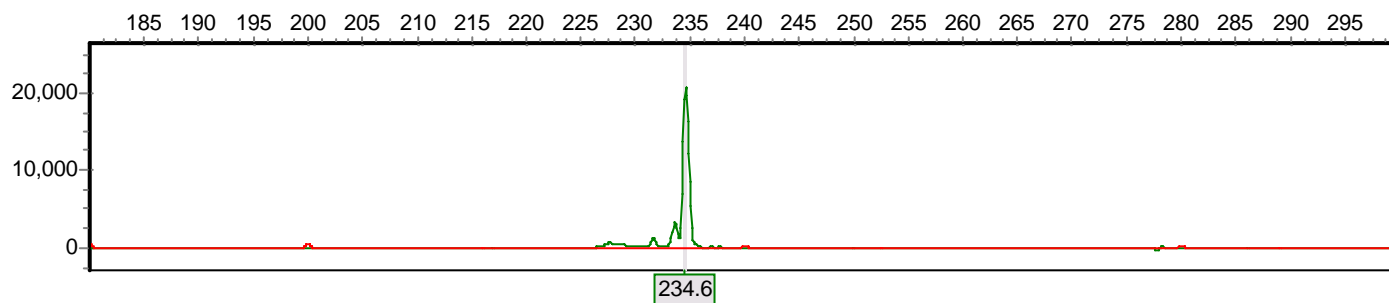

Sample 37: 37\_E05.fsa    Run date and time: 09/22/2017 - 14:52:02 -> 09/22/2017 - 15:34:31

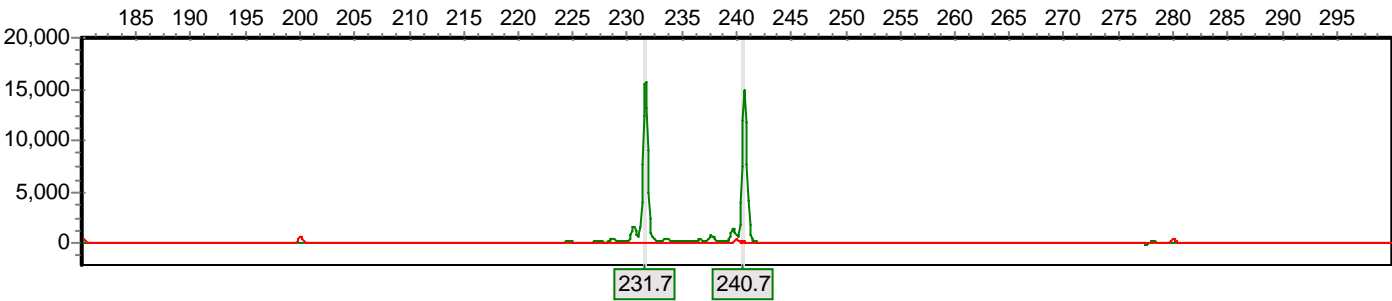

Sample 38: 38\_F05.fsa    Run date and time: 09/22/2017 - 14:52:02 -> 09/22/2017 - 15:34:31

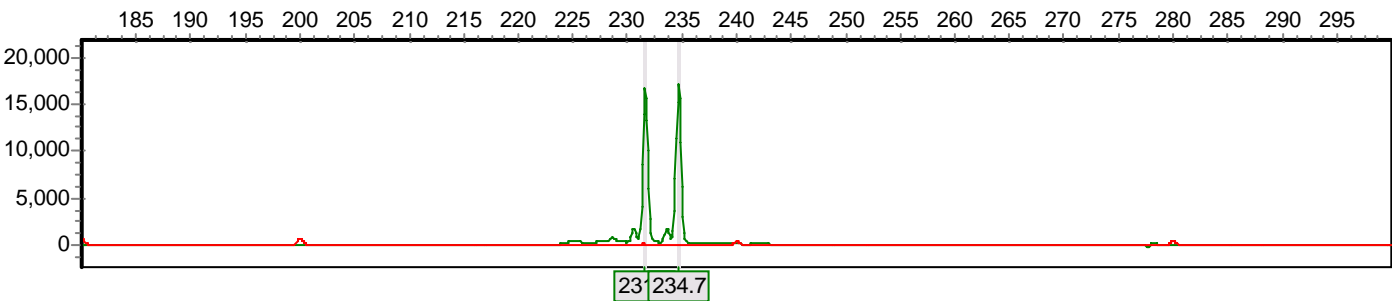

Sample 39: 39\_G05.fsa    Run date and time: 09/22/2017 - 14:52:02 -> 09/22/2017 - 15:34:31

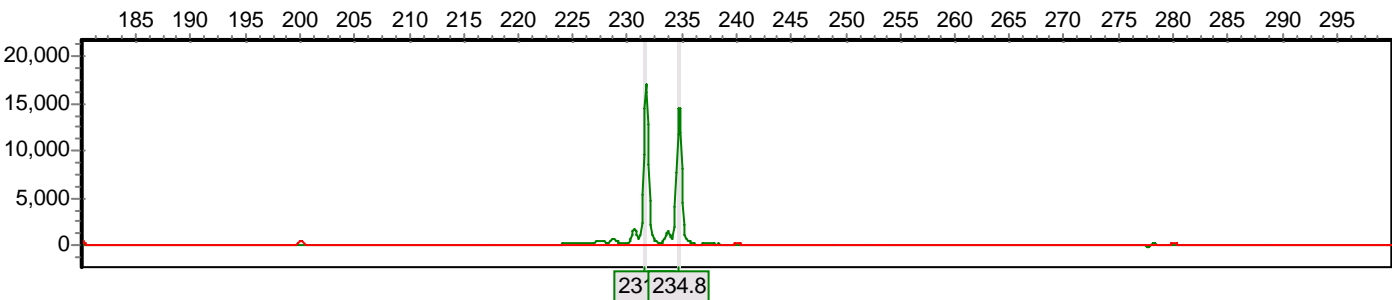

Sample 40: 40\_H05.fsa    Run date and time: 09/22/2017 - 14:52:02 -> 09/22/2017 - 15:34:31

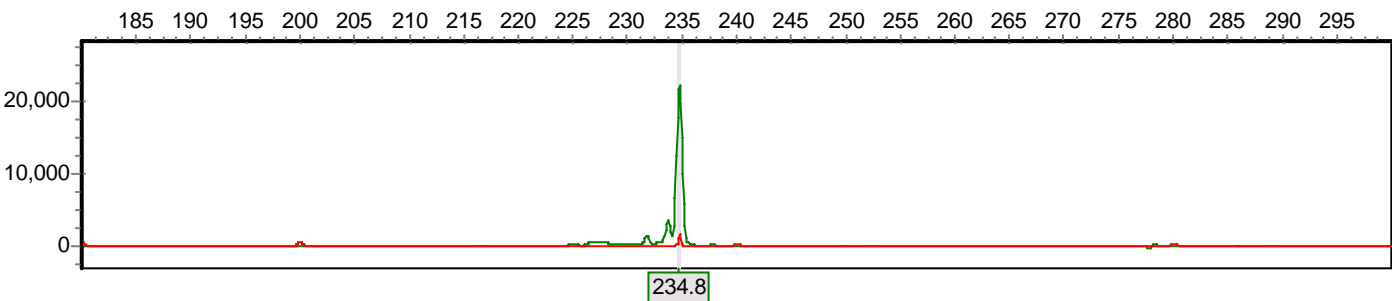

Sample 41: 41\_A06.fsa    Run date and time: 09/22/2017 - 14:52:02 -> 09/22/2017 - 15:34:31

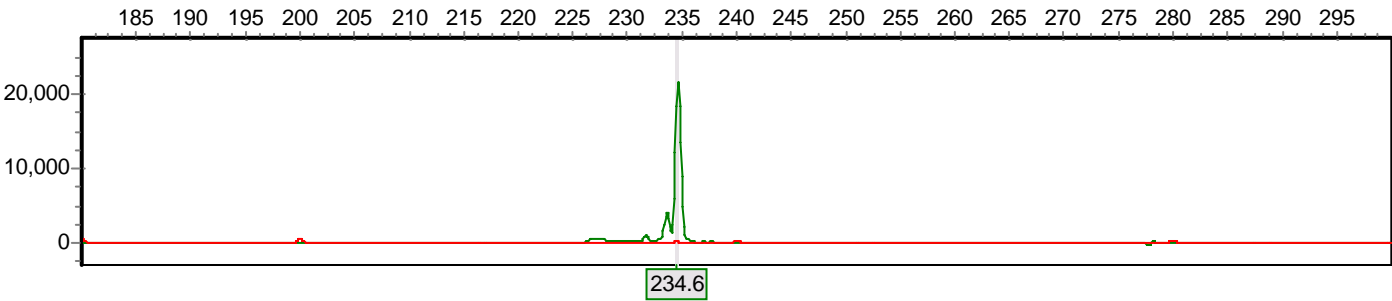

Sample 42: 42\_B06.fsa    Run date and time: 09/22/2017 - 14:52:02 -> 09/22/2017 - 15:34:31

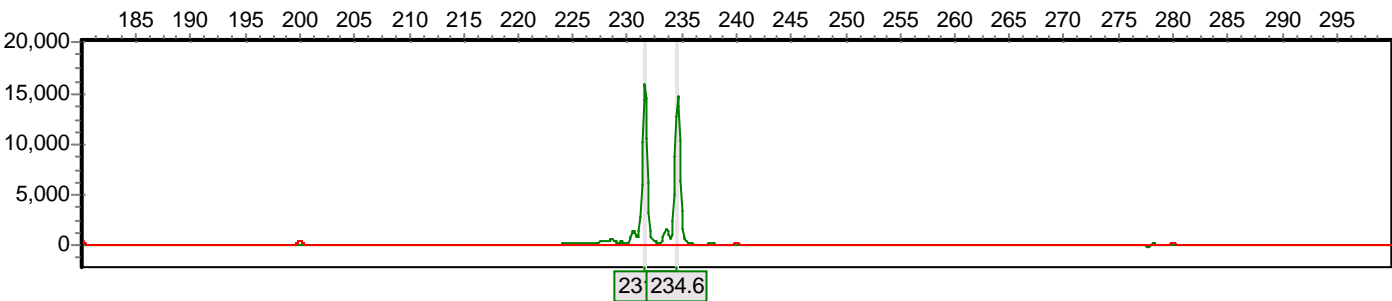

Sample 43: 43\_C06.fsa    Run date and time: 09/22/2017 - 14:52:02 -> 09/22/2017 - 15:34:31

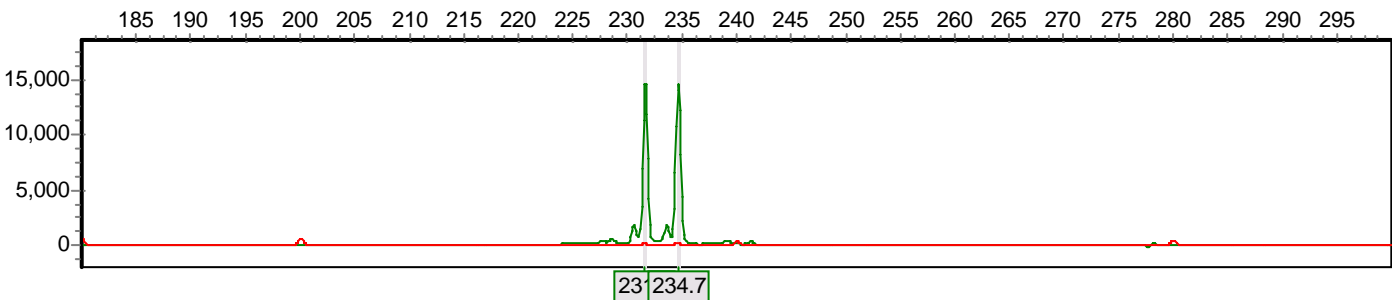

Sample 44: 44\_D06.fsa    Run date and time: 09/22/2017 - 14:52:02 -> 09/22/2017 - 15:34:31

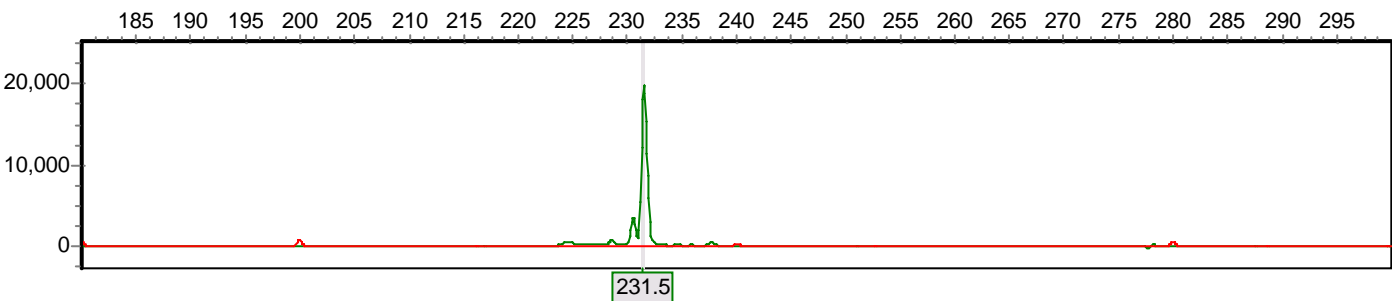

**Sample 45:** 45\_E06.fsa Run date and time: 09/22/2017 - 14:52:02 -> 09/22/2017 - 15:34:31

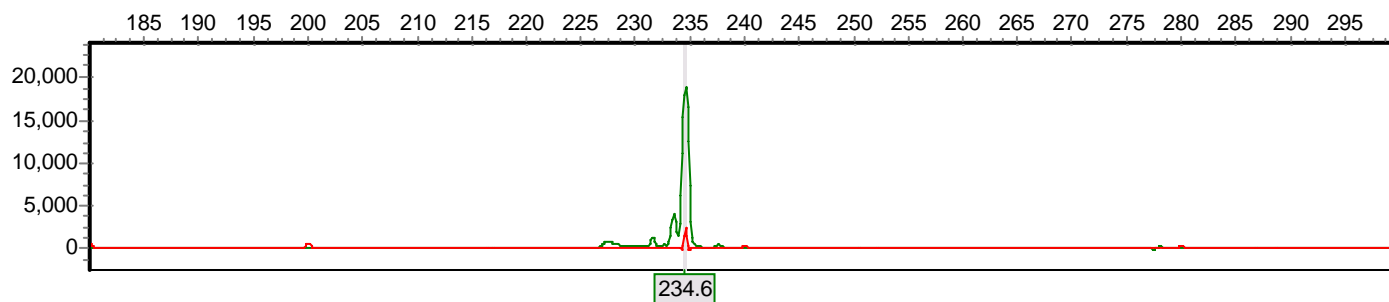

**Sample 46:** 46\_F06.fsa Run date and time: 09/22/2017 - 14:52:02 -> 09/22/2017 - 15:34:31

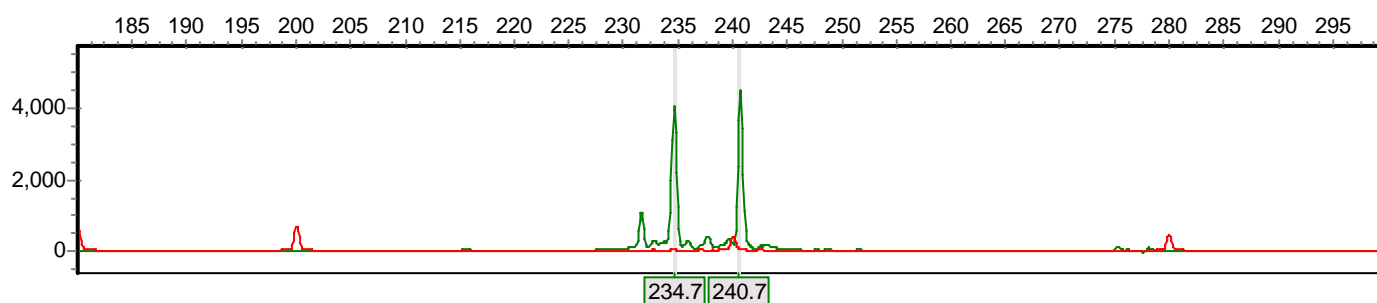

**Sample 47:** 47\_G06.fsa Run date and time: 09/22/2017 - 14:52:02 -> 09/22/2017 - 15:34:31

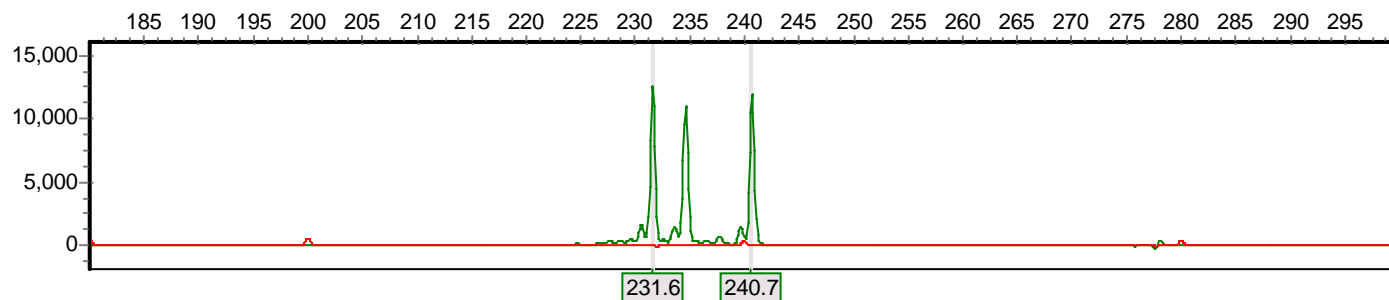

**Sample 48:** 48\_H06.fsa Run date and time: 09/22/2017 - 14:52:02 -> 09/22/2017 - 15:34:31

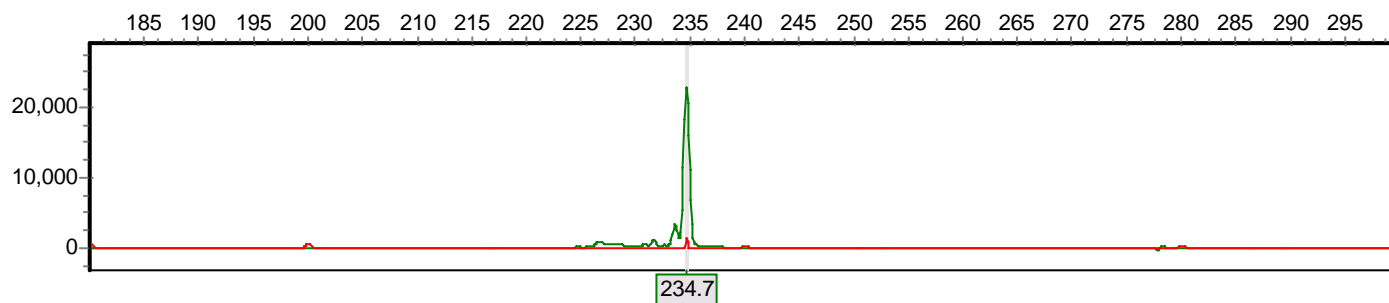

**Sample 49:** 49\_A07.fsa Run date and time: 09/22/2017 - 14:52:02 -> 09/22/2017 - 15:34:31

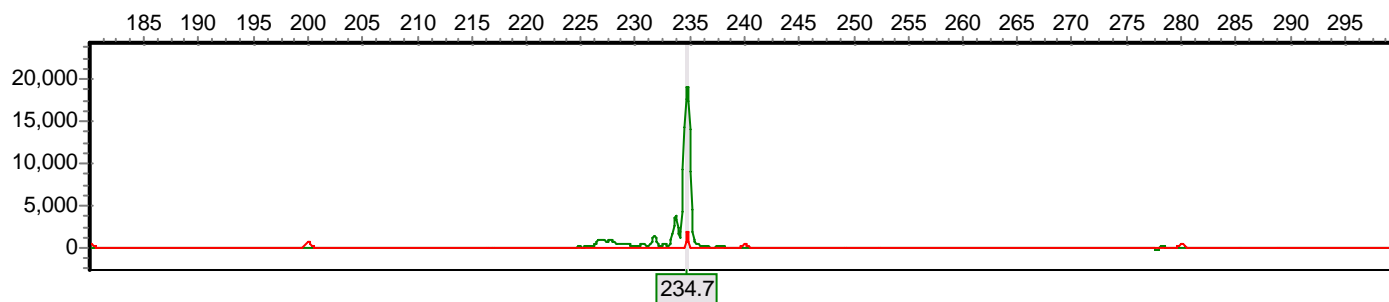

**Sample 5050\_B07.fsa** Run date and time: 09/22/2017 - 14:52:02 -> 09/22/2017 - 15:34:31

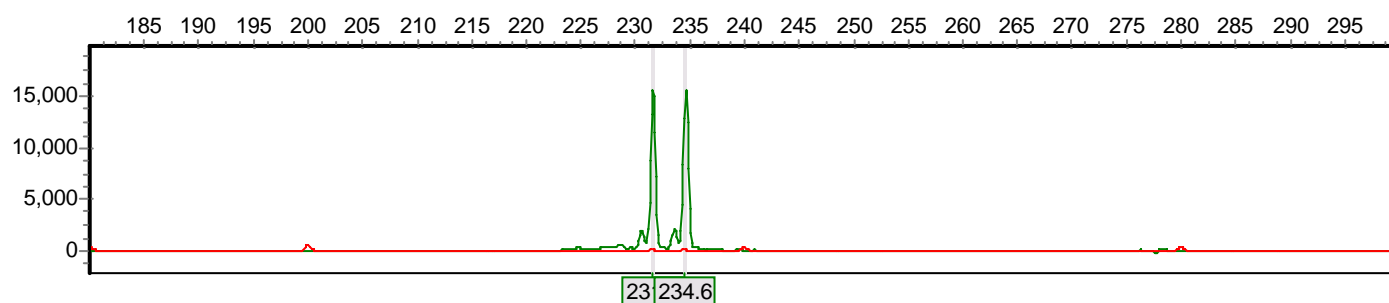

**Sample 5151\_C07.fsa** Run date and time: 09/22/2017 - 14:52:02 -> 09/22/2017 - 15:34:31

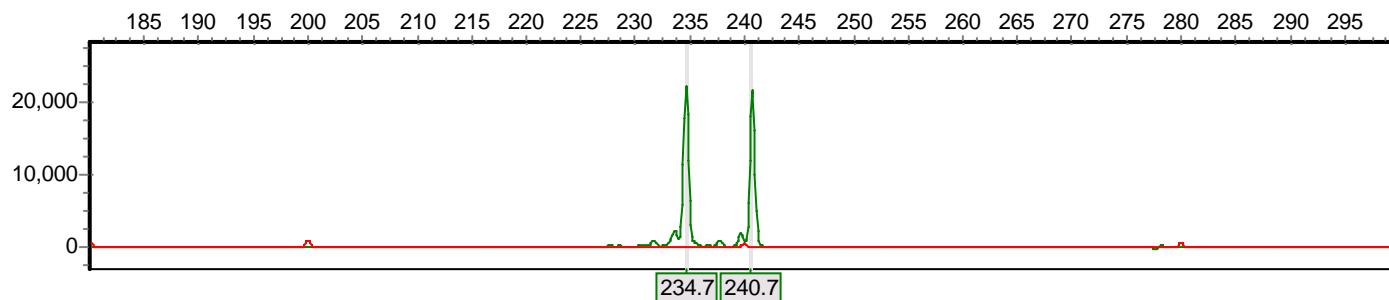

**Sample 5252\_D07.fsa** Run date and time: 09/22/2017 - 14:52:02 -> 09/22/2017 - 15:34:31

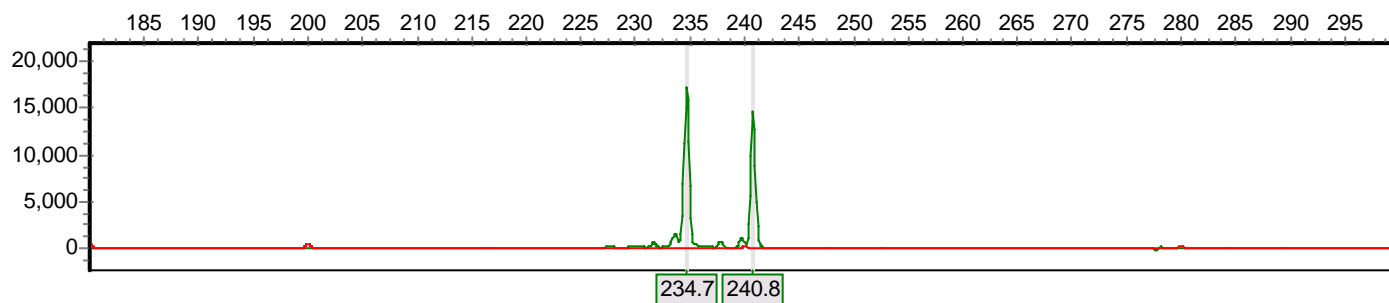

Sample 53: 53\_E07.fsa    Run date and time: 09/22/2017 - 14:52:02 -> 09/22/2017 - 15:34:31

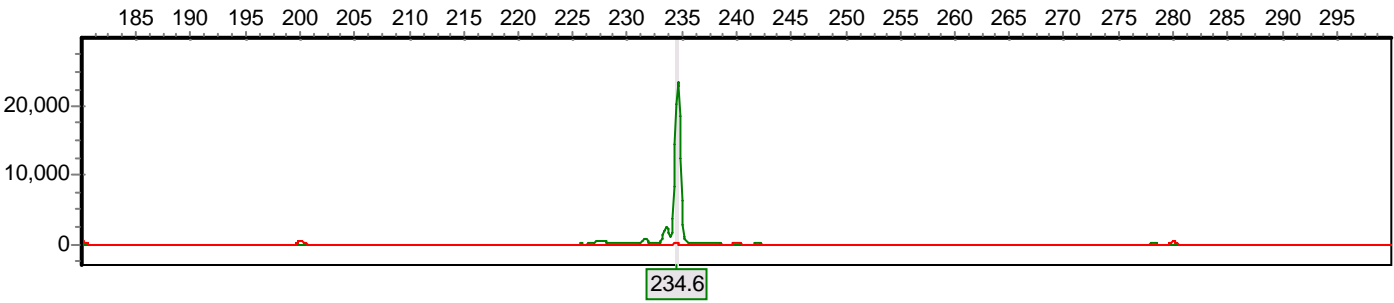

Supplement: s1 [file s1]
