# Supplementary material
Source: MDPI journal article supplement (https://www.mdpi.com/1999-4907/10/3/225)

Sample 1: 01\_A01.fsa    Run date and time: 09/22/2017 - 14:06:56 -> 09/22/2017 - 14:51:15

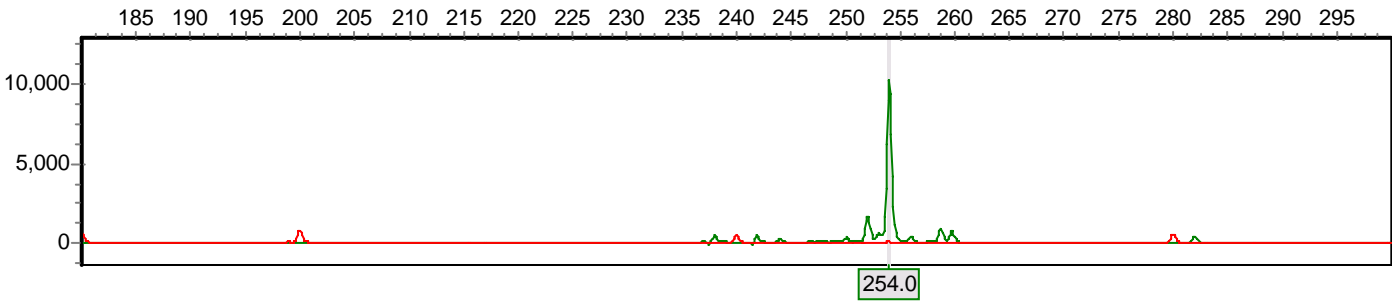

Sample 2: 02\_B01.fsa    Run date and time: 09/22/2017 - 14:06:56 -> 09/22/2017 - 14:51:15

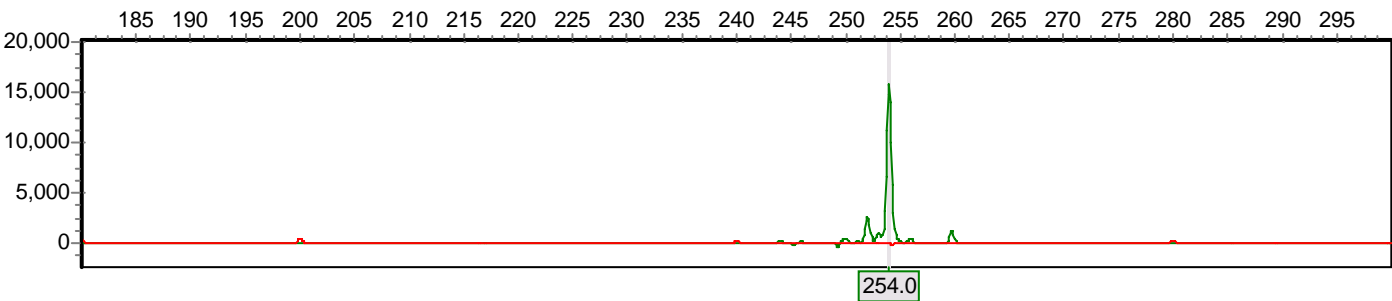

Sample 3: 03\_C01.fsa    Run date and time: 09/22/2017 - 14:06:56 -> 09/22/2017 - 14:51:15

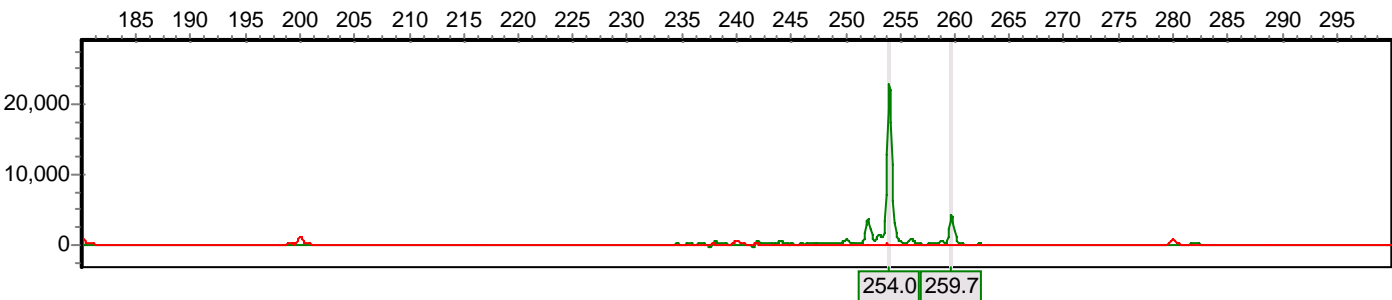

Sample 4: 04\_D01.fsa    Run date and time: 09/22/2017 - 14:06:56 -> 09/22/2017 - 14:51:15

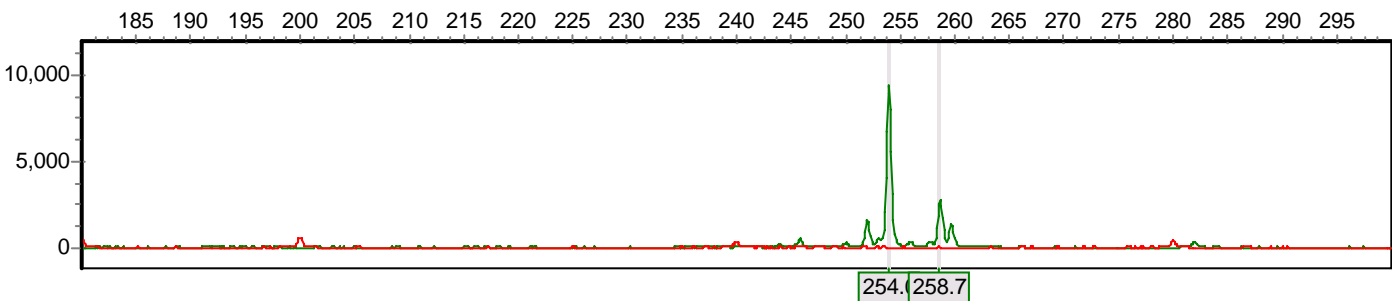

Sample 5: 05\_E01.fsa    Run date and time: 09/22/2017 - 14:06:56 -> 09/22/2017 - 14:51:15

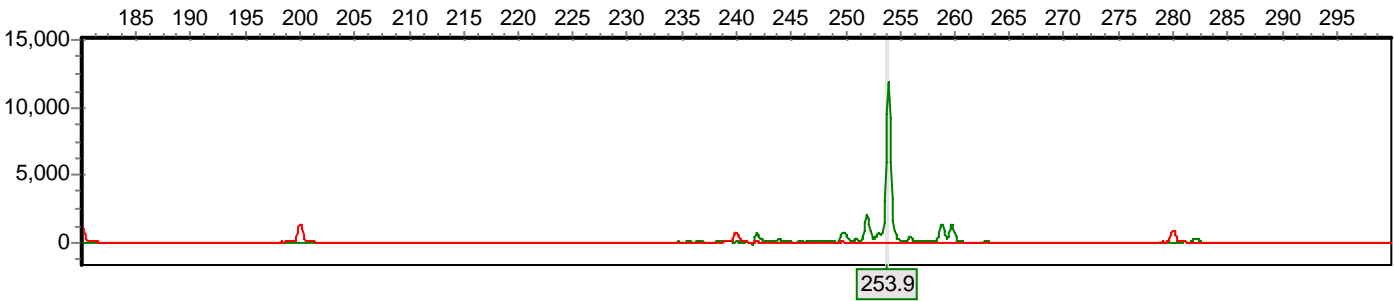

Sample 6: 06\_F01.fsa    Run date and time: 09/22/2017 - 14:06:56 -> 09/22/2017 - 14:51:15

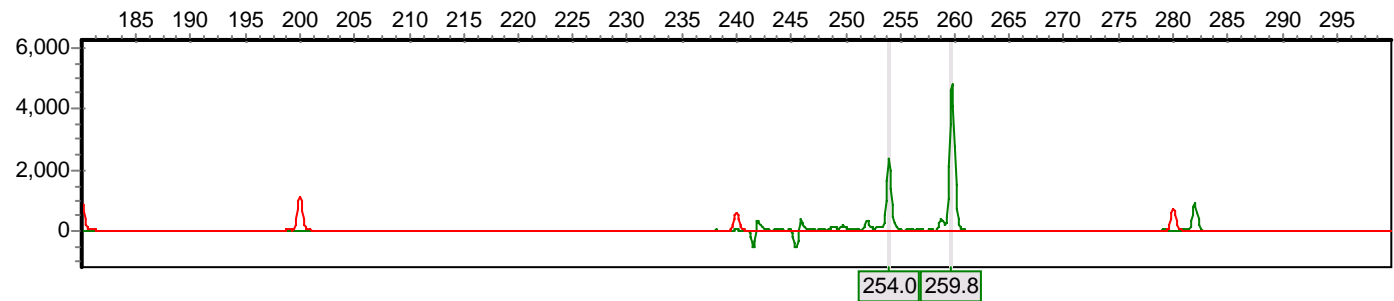

Sample 7: 07\_G01.fsa    Run date and time: 09/22/2017 - 14:06:56 -> 09/22/2017 - 14:51:15

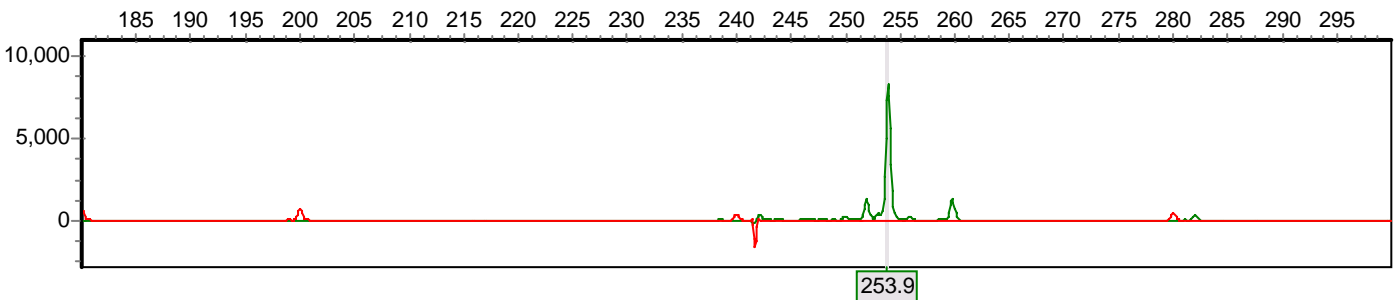

Sample 8: 08\_H01.fsa    Run date and time: 09/22/2017 - 14:06:56 -> 09/22/2017 - 14:51:15

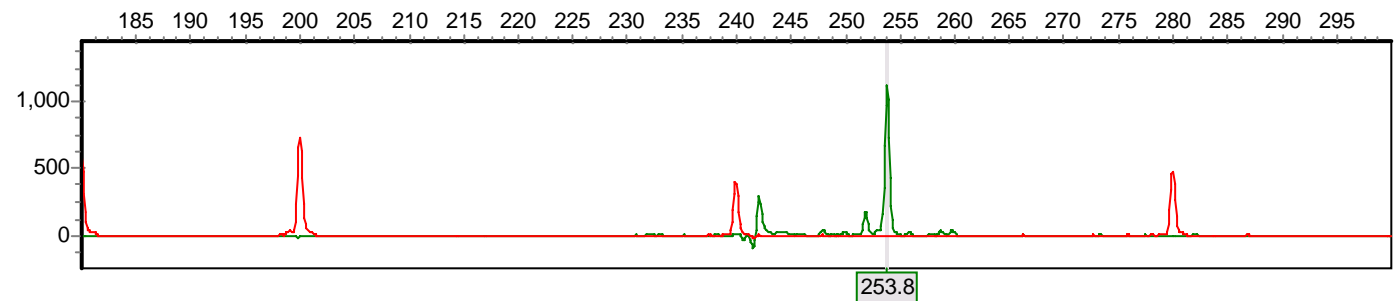

Sample 9: 09\_A02.fsa    Run date and time: 09/22/2017 - 14:06:56 -> 09/22/2017 - 14:51:15

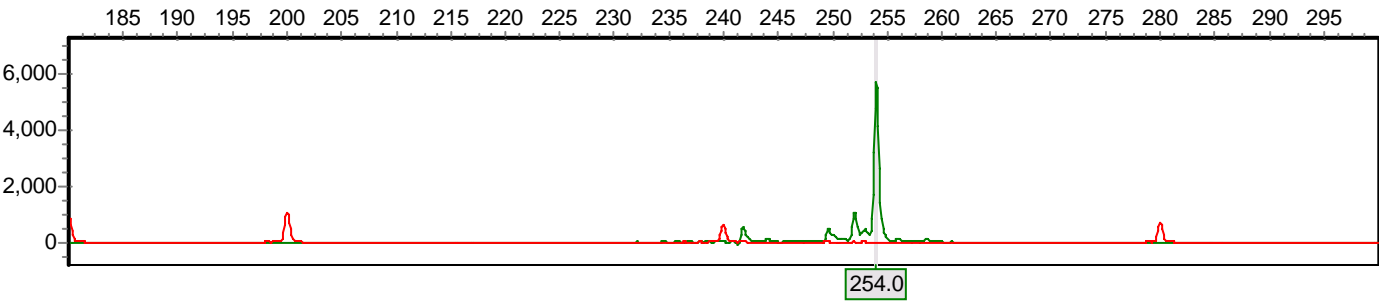

Sample 10: 10\_B02.fsa    Run date and time: 09/22/2017 - 14:06:56 -> 09/22/2017 - 14:51:15

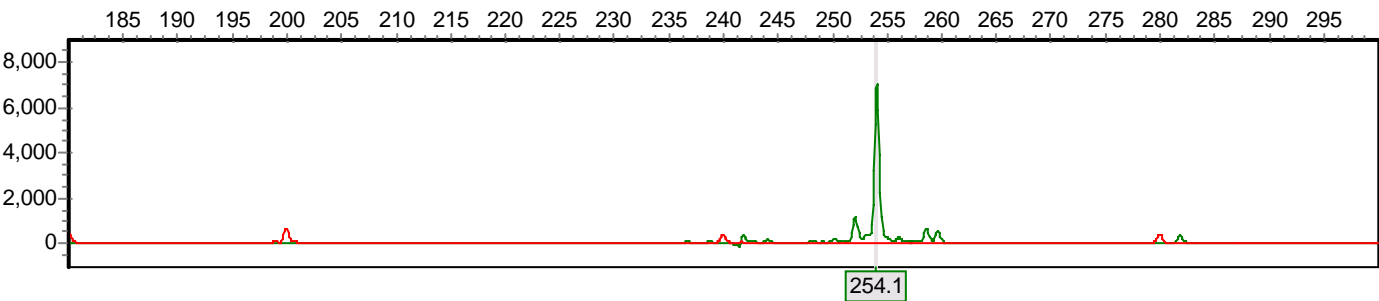

Sample 11: 11\_C02.fsa    Run date and time: 09/22/2017 - 14:06:56 -> 09/22/2017 - 14:51:15

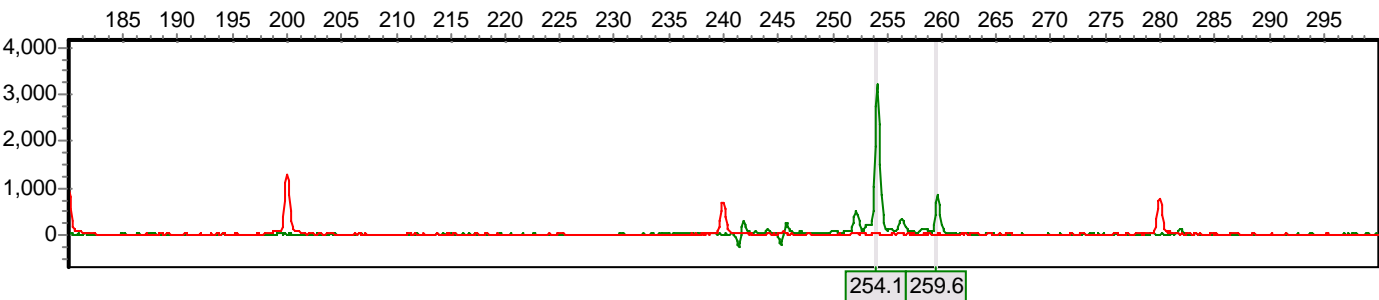

Sample 12: 12\_D02.fsa    Run date and time: 09/22/2017 - 14:06:56 -> 09/22/2017 - 14:51:15

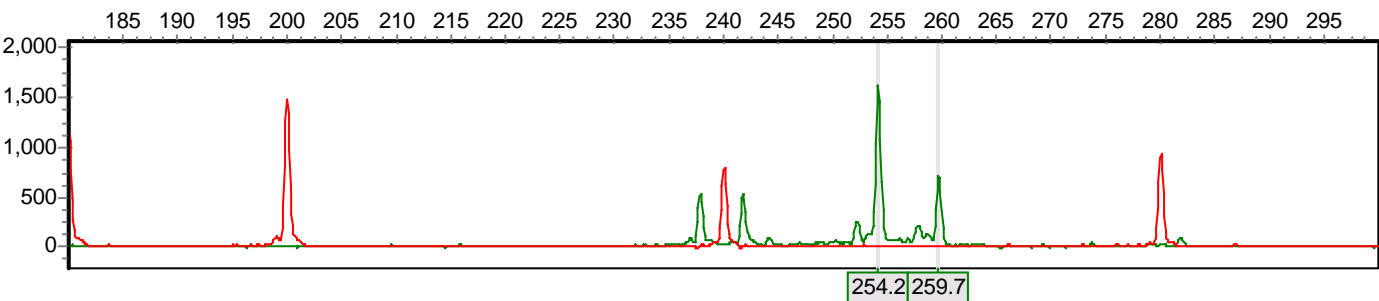

**Sample 13:** 13\_E02.fsa Run date and time: 09/22/2017 - 14:06:56 -> 09/22/2017 - 14:51:15

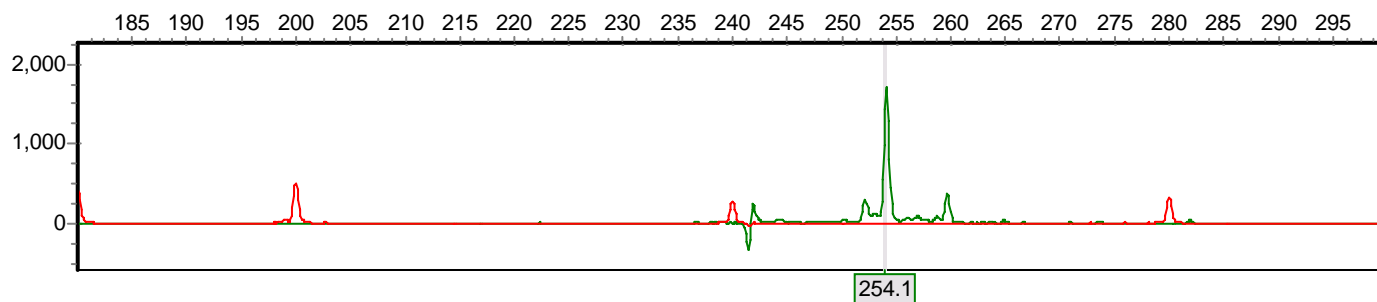

**Sample 14** 14\_F02.fsa Run date and time: 09/22/2017 - 14:06:56 -> 09/22/2017 - 14:51:15

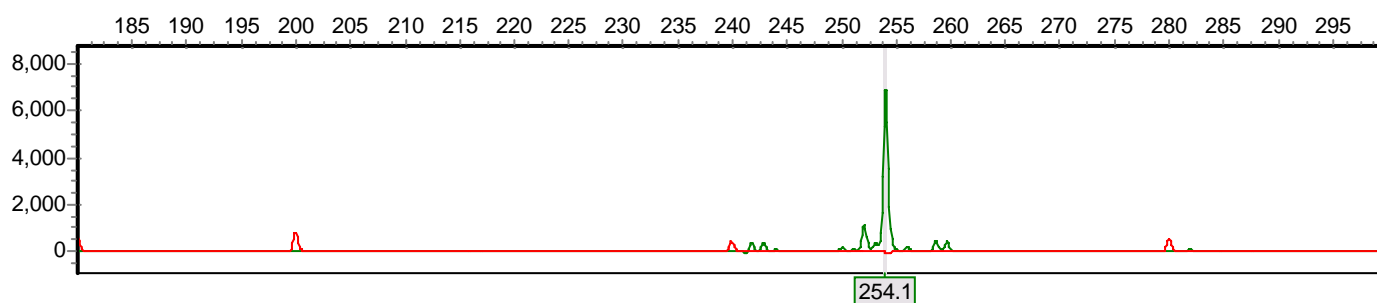

**Sample 15** 15\_G02.fsa Run date and time: 09/22/2017 - 14:06:56 -> 09/22/2017 - 14:51:15

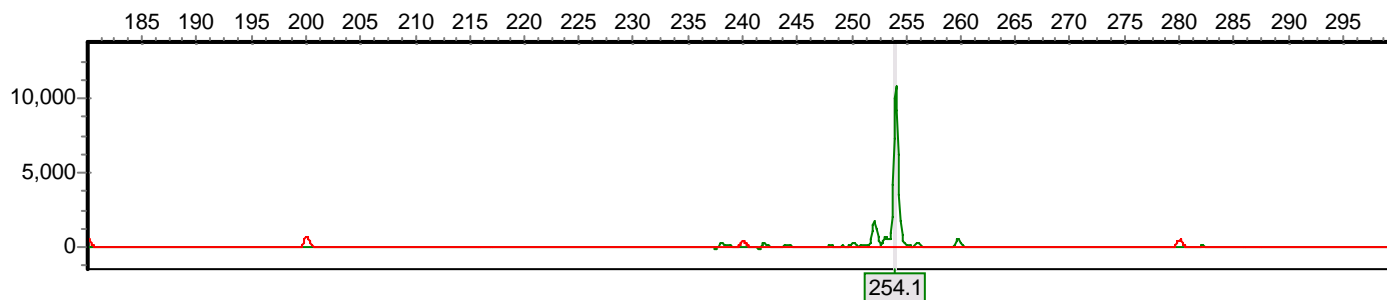

**Sample 16** 16\_H02.fsa Run date and time: 09/22/2017 - 14:06:56 -> 09/22/2017 - 14:51:15

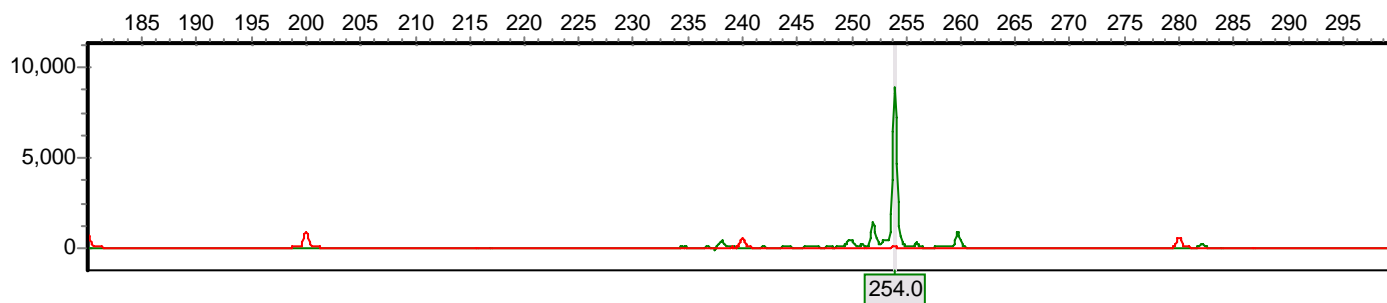

Sample 17: 17\_A03.fsa    Run date and time: 09/22/2017 - 14:06:56 -> 09/22/2017 - 14:51:15

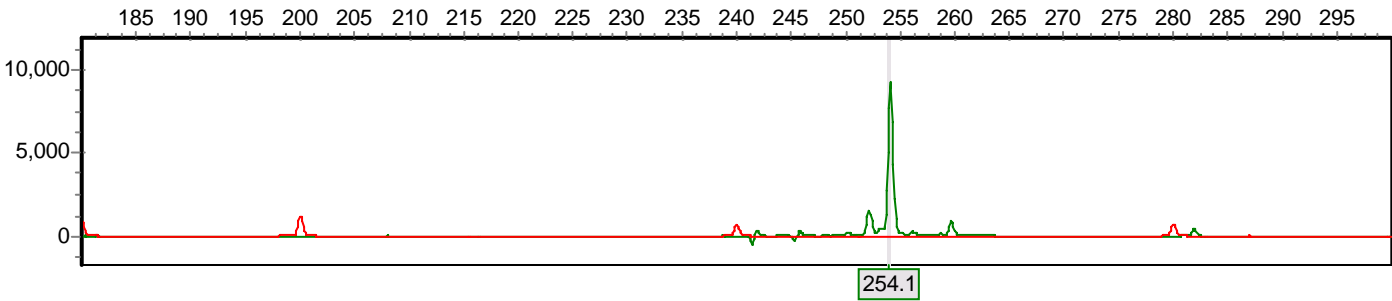

Sample 18: 18\_B03.fsa    Run date and time: 09/22/2017 - 14:06:56 -> 09/22/2017 - 14:51:15

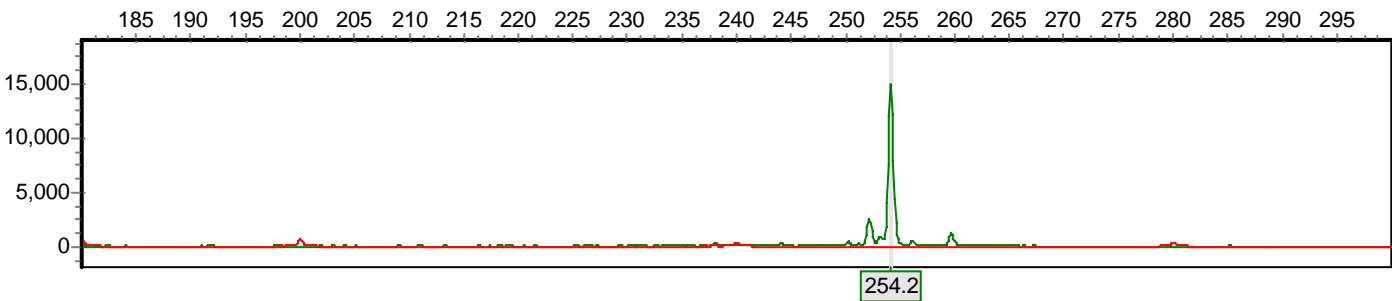

Sample 19: 19\_C03.fsa    Run date and time: 09/22/2017 - 14:06:56 -> 09/22/2017 - 14:51:15

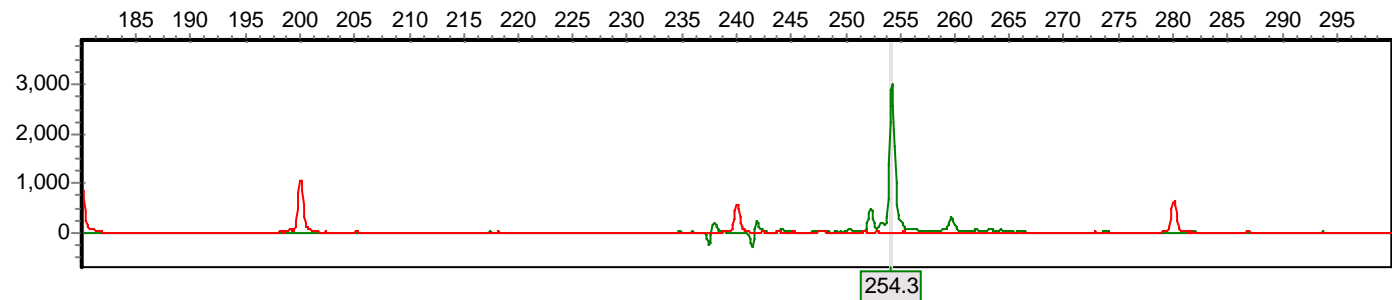

Sample 20: 20\_D03.fsa    Run date and time: 09/22/2017 - 14:06:56 -> 09/22/2017 - 14:51:15

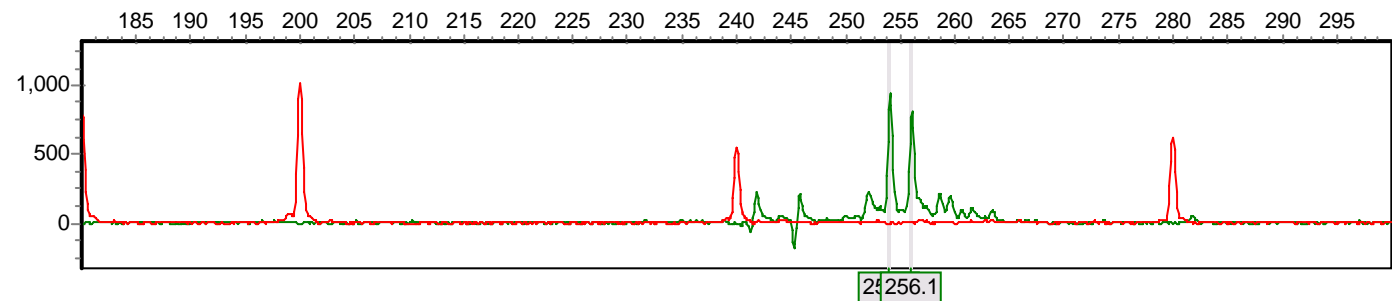

Sample 21: 21\_E03.fsa    Run date and time: 09/22/2017 - 14:06:56 -> 09/22/2017 - 14:51:15

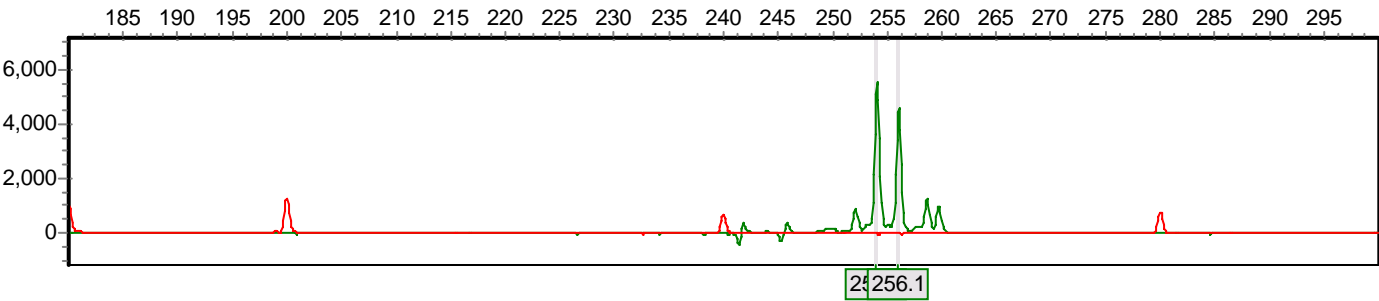

Sample 22: 222\_F03.fsa    Run date and time: 09/22/2017 - 14:06:56 -> 09/22/2017 - 14:51:15

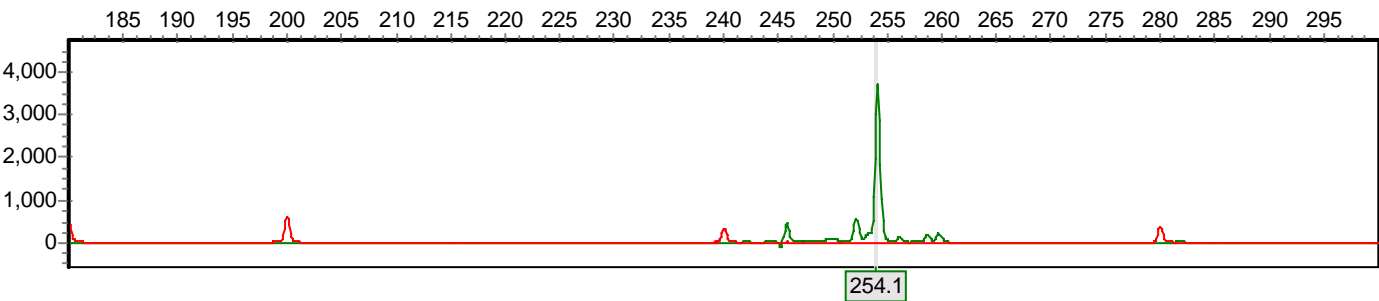

Sample 23: 233\_G03.fsa    Run date and time: 09/22/2017 - 14:06:56 -> 09/22/2017 - 14:51:15

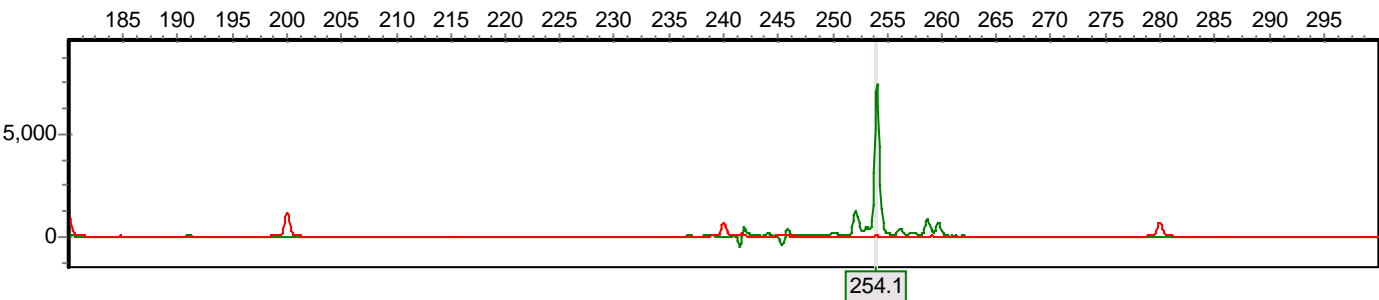

Sample 24: 244\_H03.fsa    Run date and time: 09/22/2017 - 14:06:56 -> 09/22/2017 - 14:51:15

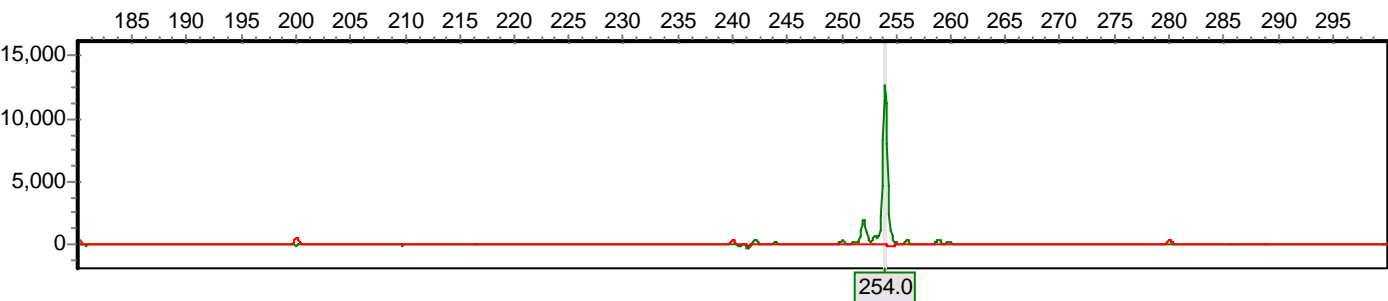

Sample 25: 25\_A04.fsa    Run date and time: 09/22/2017 - 14:06:56 -> 09/22/2017 - 14:51:15

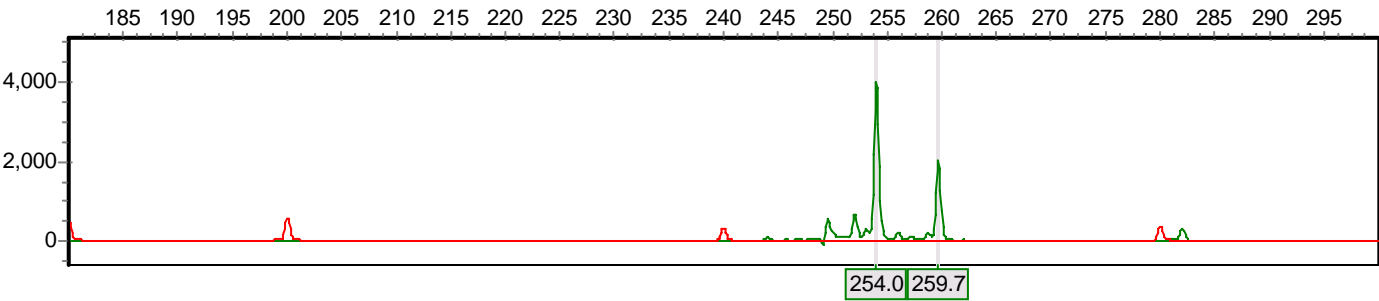

Sample 26: 26\_B04.fsa    Run date and time: 09/22/2017 - 14:06:56 -> 09/22/2017 - 14:51:15

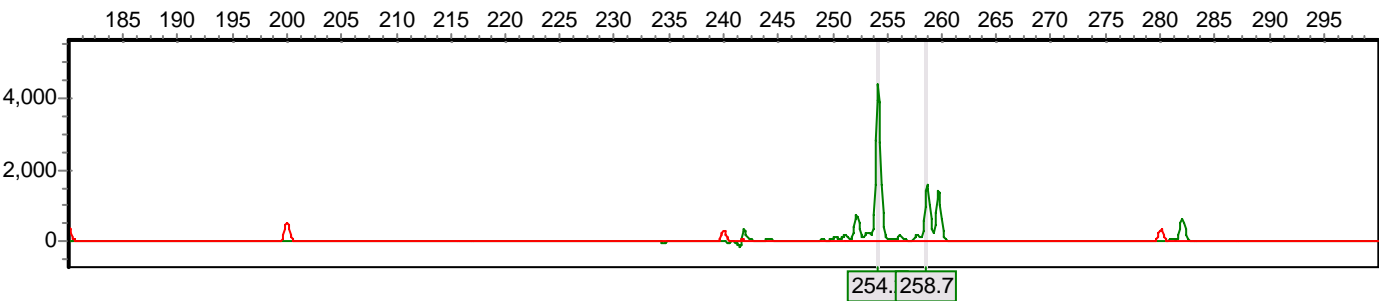

Sample 27: 27\_C04.fsa    Run date and time: 09/22/2017 - 14:06:56 -> 09/22/2017 - 14:51:15

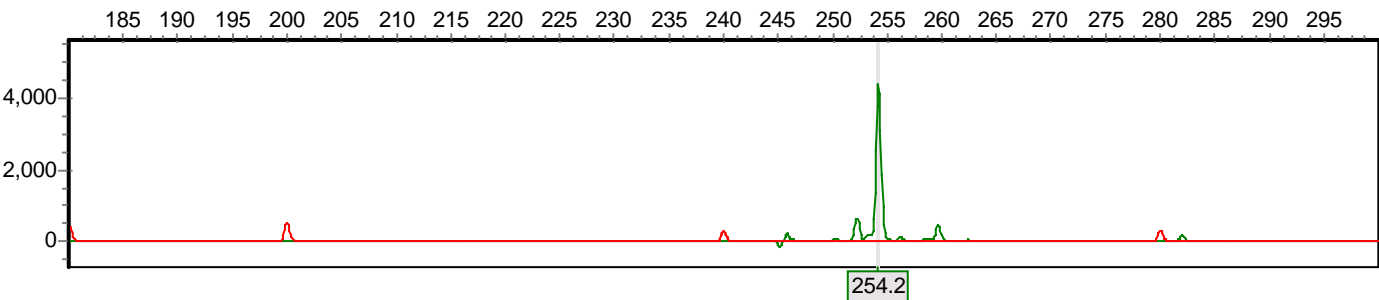

Sample 28: 28\_D04.fsa    Run date and time: 09/22/2017 - 14:06:56 -> 09/22/2017 - 14:51:15

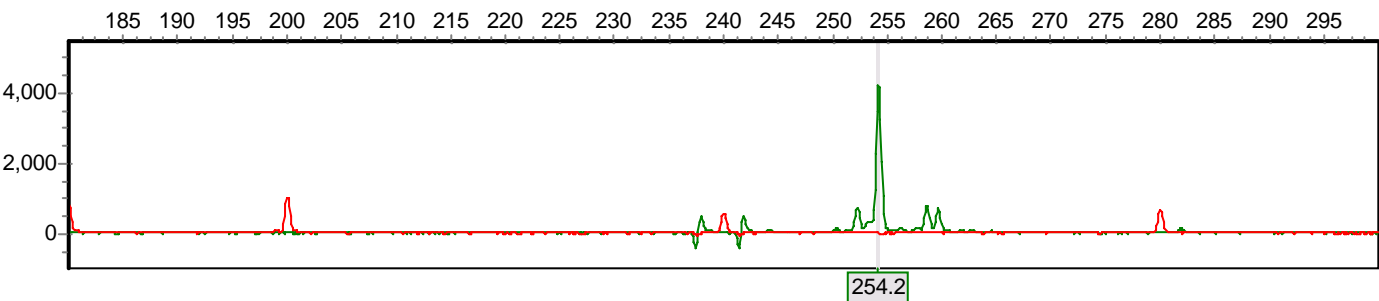

Sample 29: 29\_E04.fsa    Run date and time: 09/22/2017 - 14:06:56 -> 09/22/2017 - 14:51:15

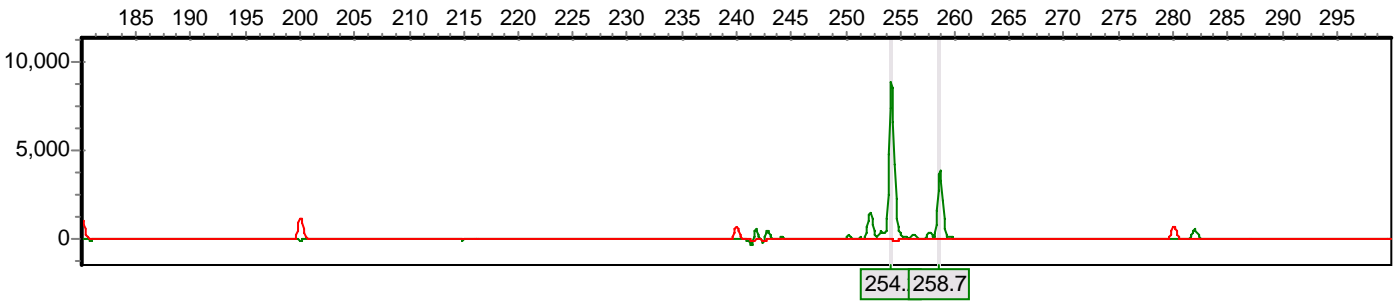

Sample 30: 30\_F04.fsa    Run date and time: 09/22/2017 - 14:06:56 -> 09/22/2017 - 14:51:15

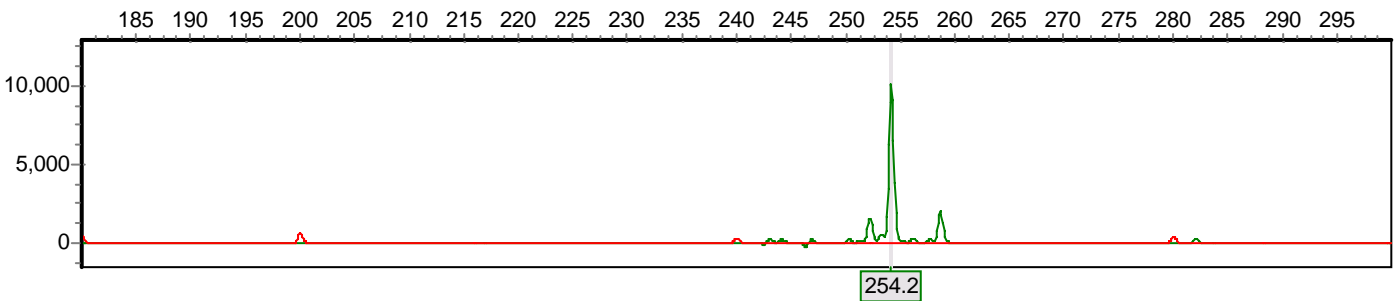

Sample 31: 31\_G04.fsa    Run date and time: 09/22/2017 - 14:06:56 -> 09/22/2017 - 14:51:15

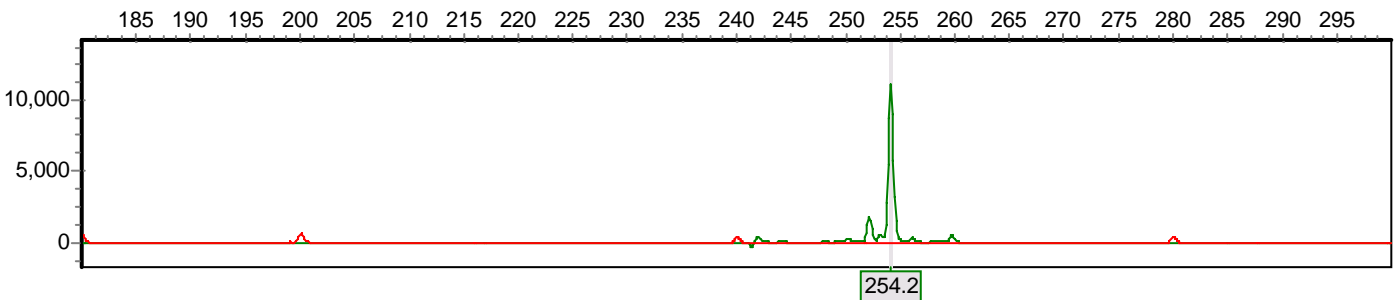

Sample 32: 32\_H04.fsa    Run date and time: 09/22/2017 - 14:06:56 -> 09/22/2017 - 14:51:15

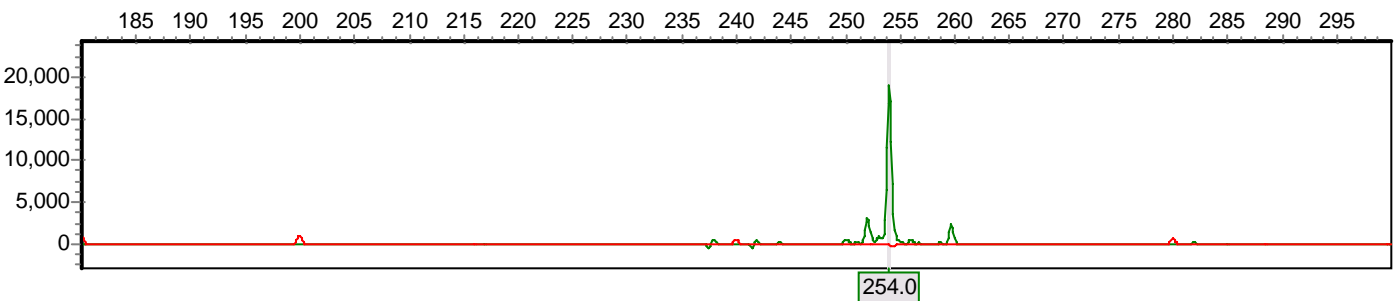



**Sample 33:** 33\_A05.fsa Run date and time: 09/22/2017 - 14:06:56 -> 09/22/2017 - 14:51:15

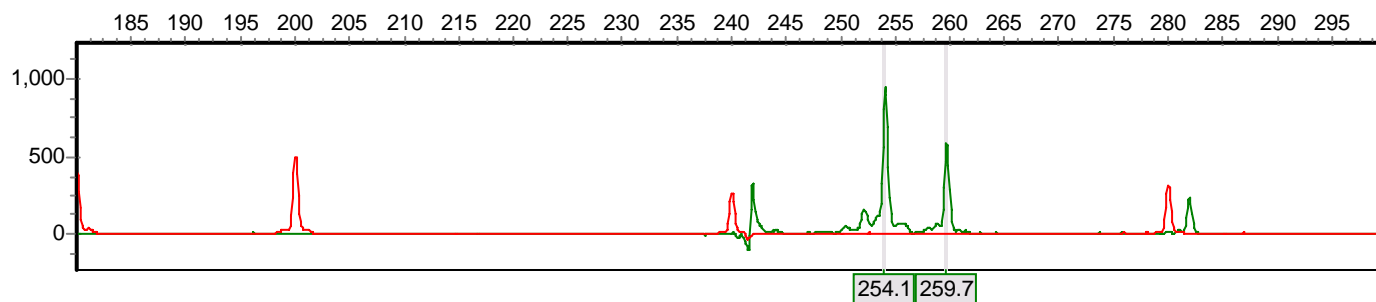

**Sample 34:** 34\_B05.fsa Run date and time: 09/22/2017 - 14:06:56 -> 09/22/2017 - 14:51:15

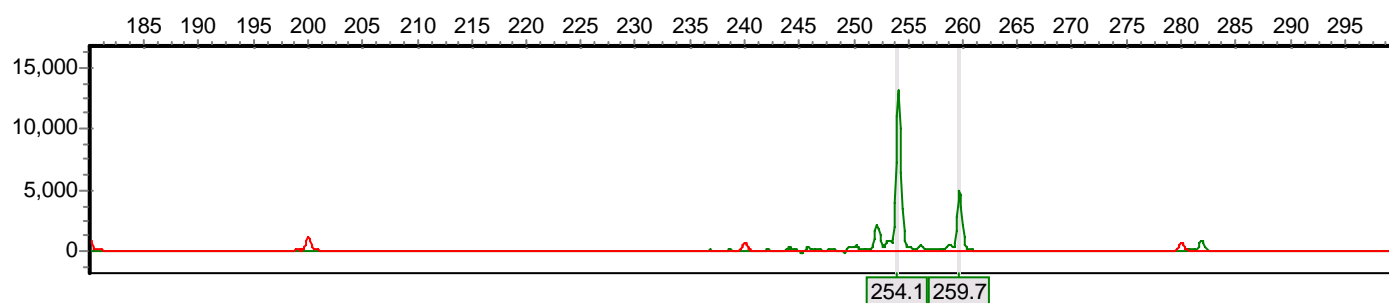

**Sample 35:** 35\_C05.fsa Run date and time: 09/22/2017 - 14:06:56 -> 09/22/2017 - 14:51:15

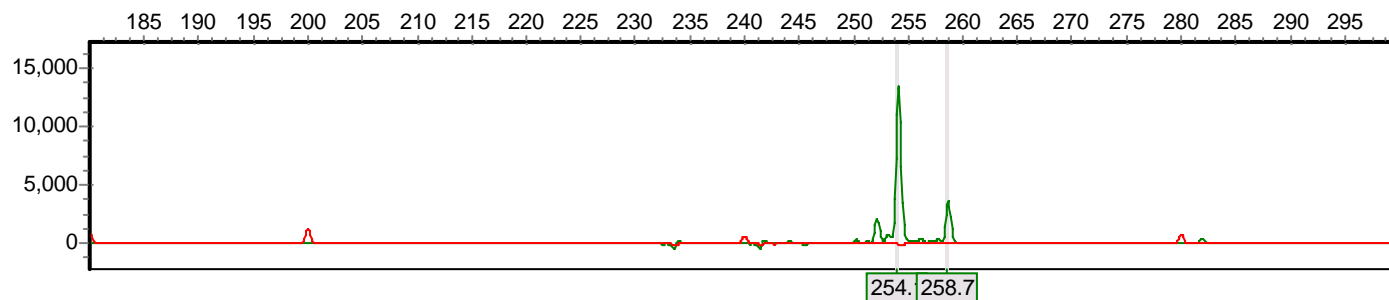

**Sample 36:** 36\_D05.fsa Run date and time: 09/22/2017 - 14:06:56 -> 09/22/2017 - 14:51:15

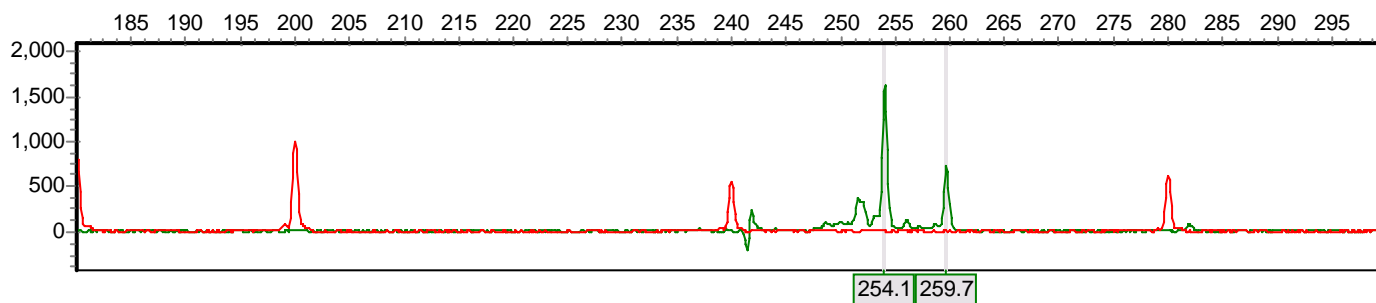

Sample 37: 37\_E05.fsa    Run date and time: 09/22/2017 - 14:06:56 -> 09/22/2017 - 14:51:15

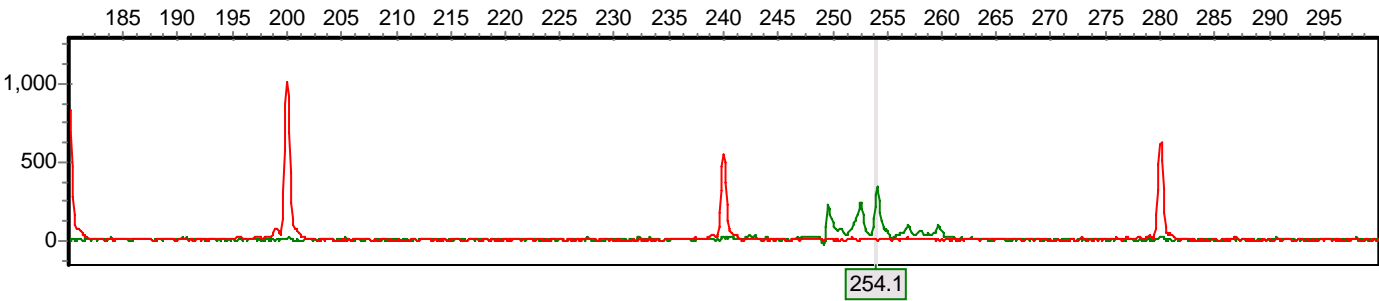

Sample 38 38\_F05.fsa    Run date and time: 09/22/2017 - 14:06:56 -> 09/22/2017 - 14:51:15

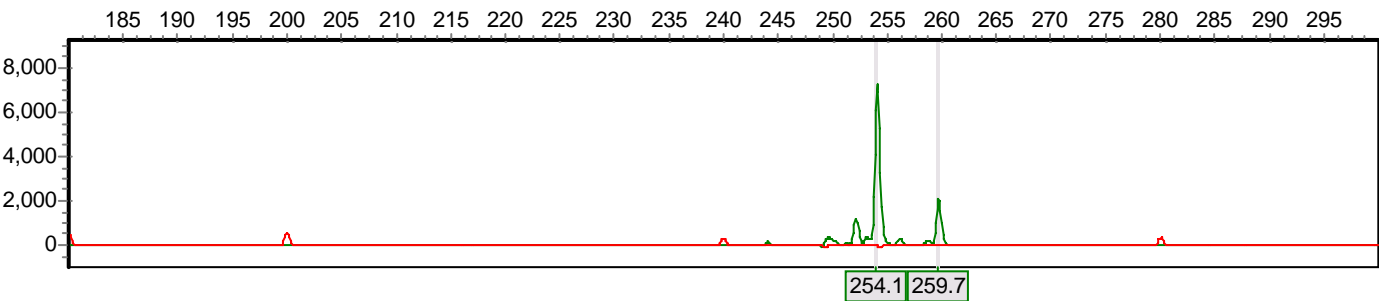

Sample 39 39\_G05.fsa    Run date and time: 09/22/2017 - 14:06:56 -> 09/22/2017 - 14:51:15

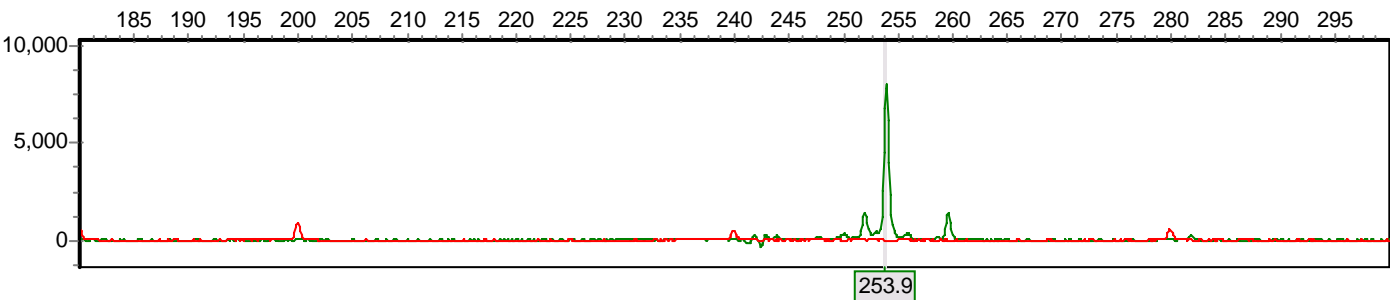

Sample 40 40\_H05.fsa    Run date and time: 09/22/2017 - 14:06:56 -> 09/22/2017 - 14:51:15

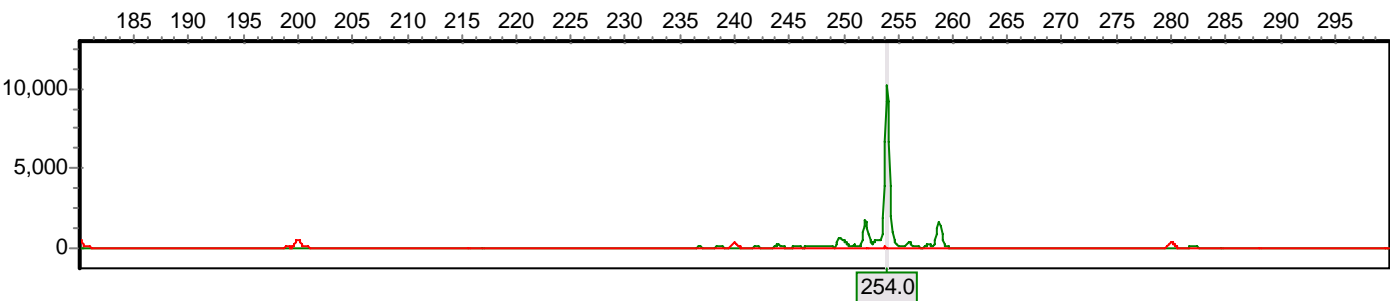

Sample 41: 41\_A06.fsa    Run date and time: 09/22/2017 - 14:06:56 -> 09/22/2017 - 14:51:15

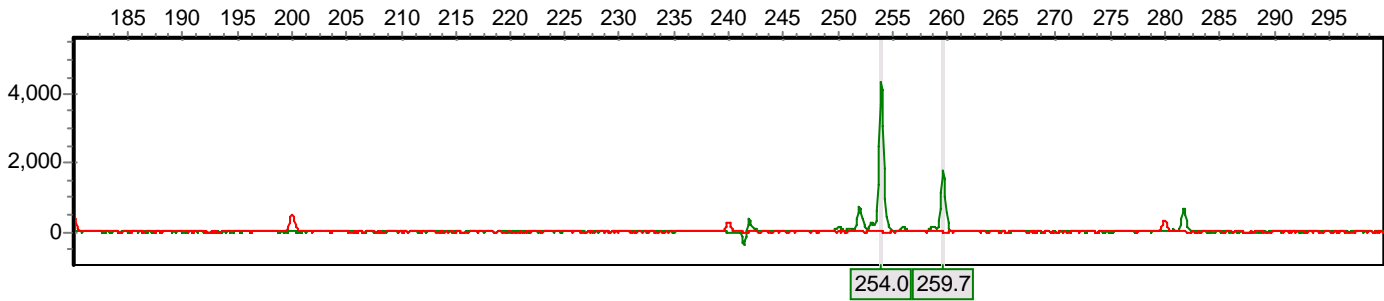

Sample 42: 42\_B06.fsa    Run date and time: 09/22/2017 - 14:06:56 -> 09/22/2017 - 14:51:15

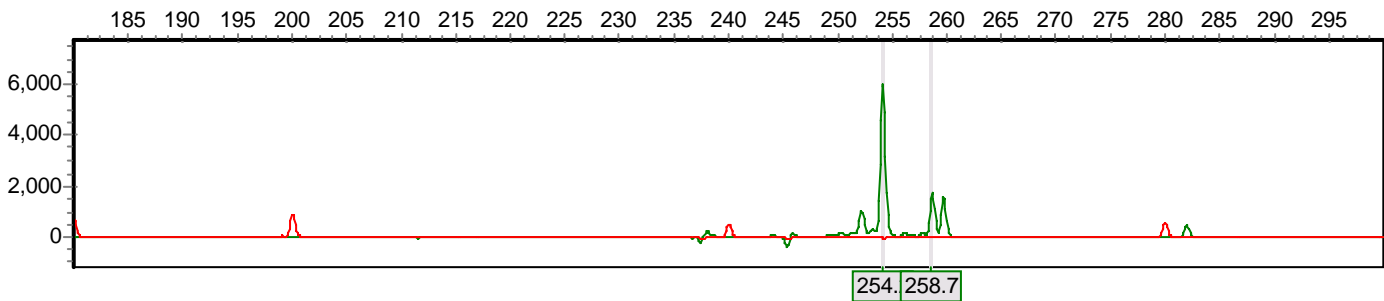

Sample 43: 43\_C06.fsa    Run date and time: 09/22/2017 - 14:06:56 -> 09/22/2017 - 14:51:15

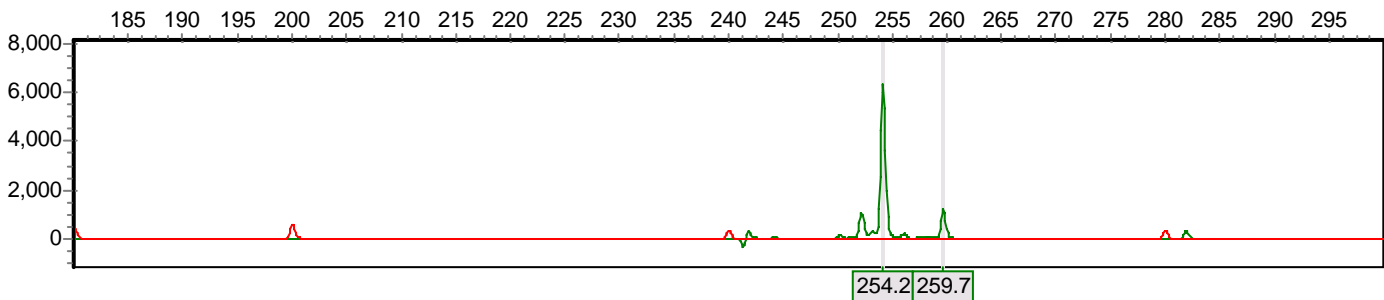

Sample 44: 44\_D06.fsa    Run date and time: 09/22/2017 - 14:06:56 -> 09/22/2017 - 14:51:15

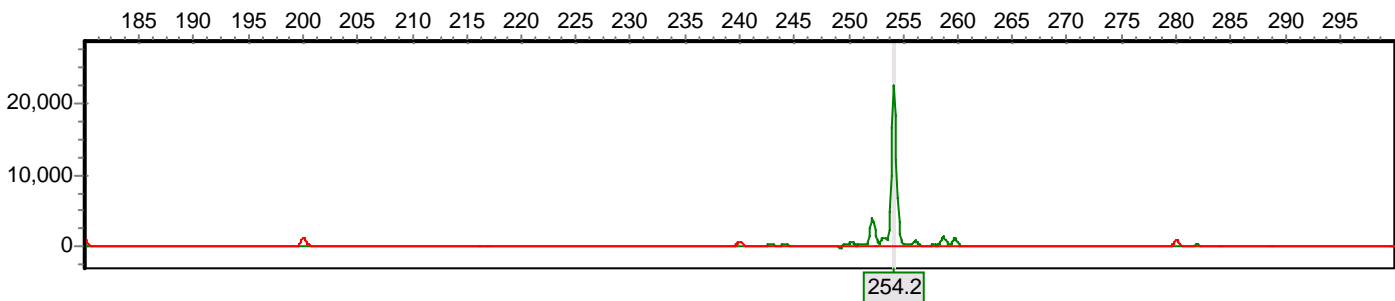

**Sample 45:** 45\_E06.fsa Run date and time: 09/22/2017 - 14:06:56 -> 09/22/2017 - 14:51:15

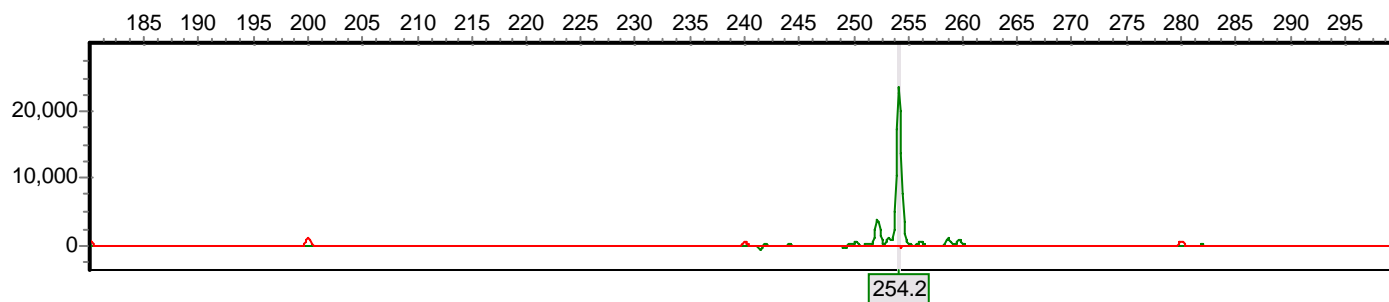

**Sample 46:** 46\_F06.fsa Run date and time: 09/22/2017 - 14:06:56 -> 09/22/2017 - 14:51:15

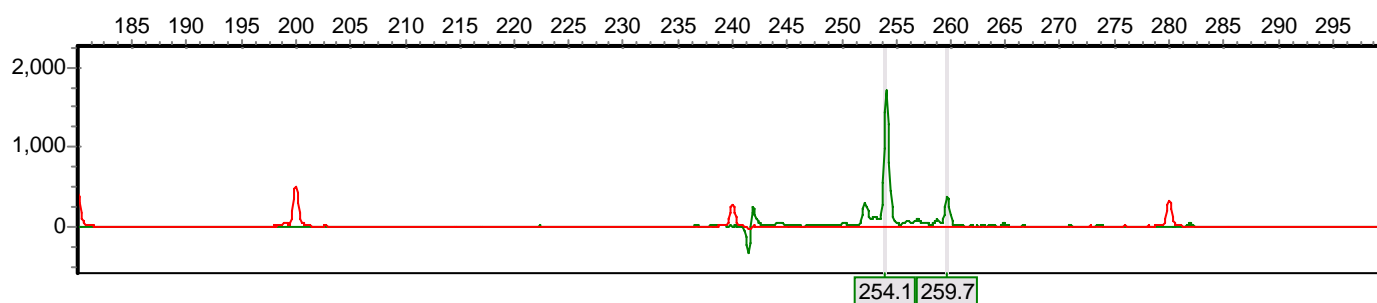

**Sample 47:** 47\_G06.fsa Run date and time: 09/22/2017 - 14:06:56 -> 09/22/2017 - 14:51:15

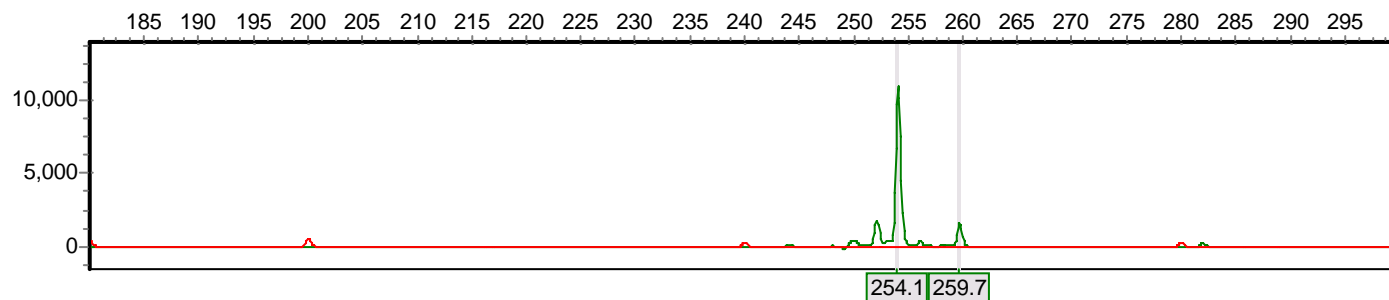

**Sample 48:** 48\_H06.fsa Run date and time: 09/22/2017 - 14:06:56 -> 09/22/2017 - 14:51:15

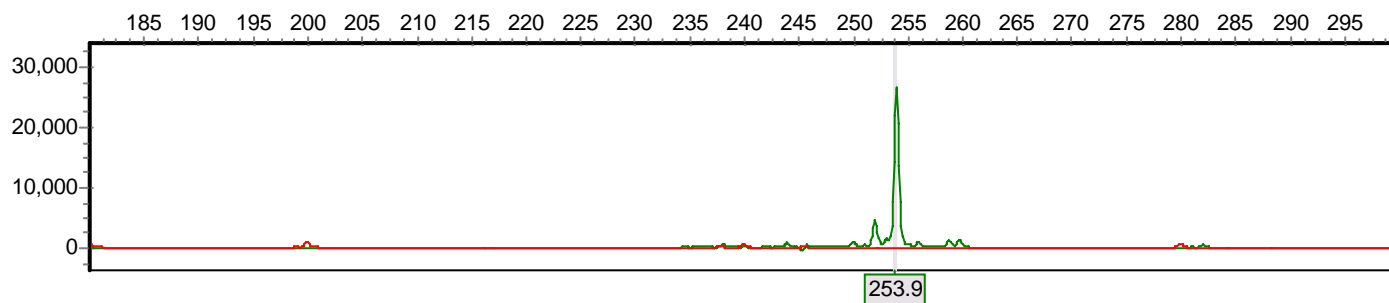

Sample 49: 49\_A07.fsa    Run date and time: 09/22/2017 - 14:06:56 -> 09/22/2017 - 14:51:15

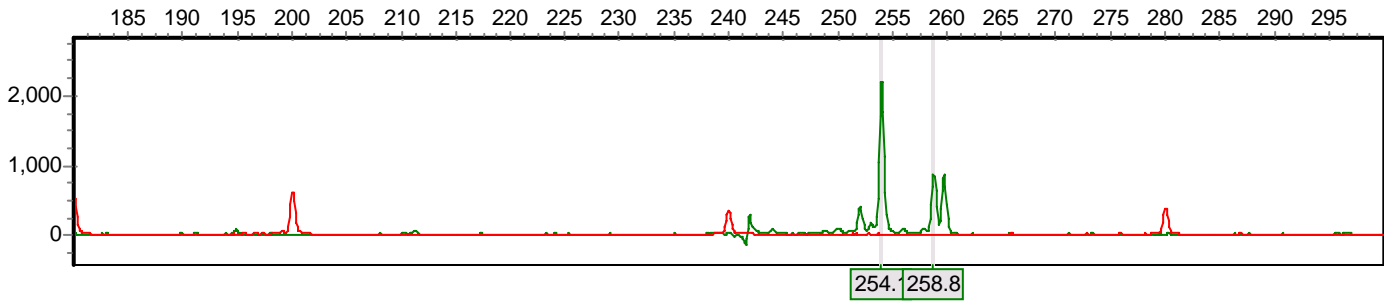

Sample 50: 50\_B07.fsa    Run date and time: 09/22/2017 - 14:06:56 -> 09/22/2017 - 14:51:15

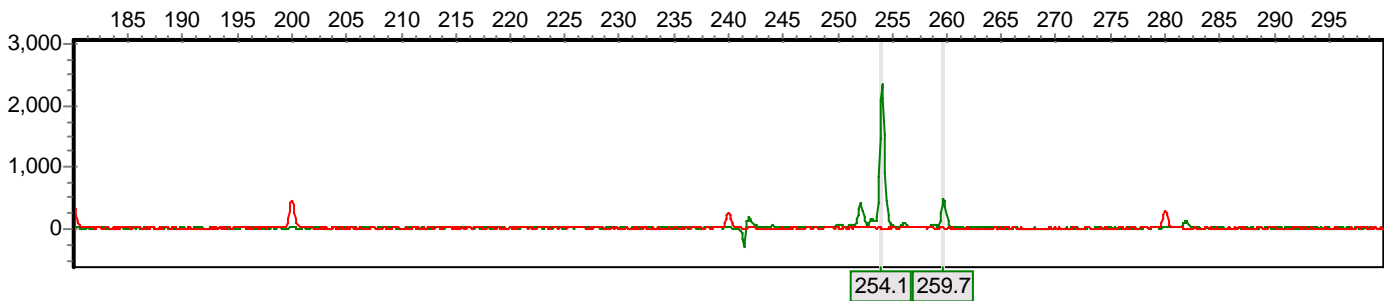

Sample 51: 51\_C07.fsa    Run date and time: 09/22/2017 - 14:06:56 -> 09/22/2017 - 14:51:15

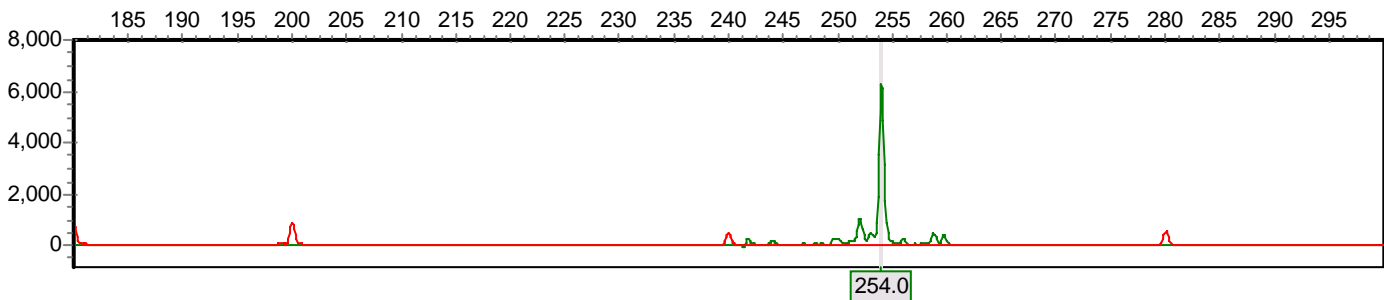

Sample 52: 52\_D07.fsa    Run date and time: 09/22/2017 - 14:06:56 -> 09/22/2017 - 14:51:15

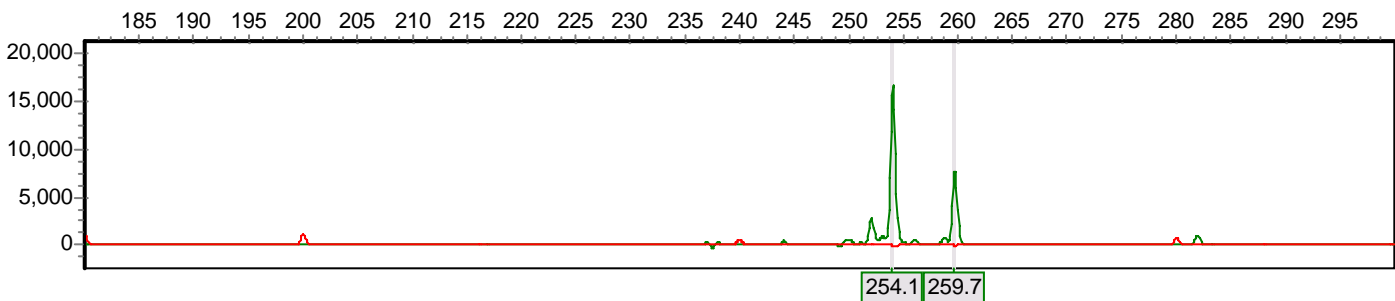

Sample 53: 53\_E07.fsa    Run date and time: 09/22/2017 - 14:06:56 -> 09/22/2017 - 14:51:15

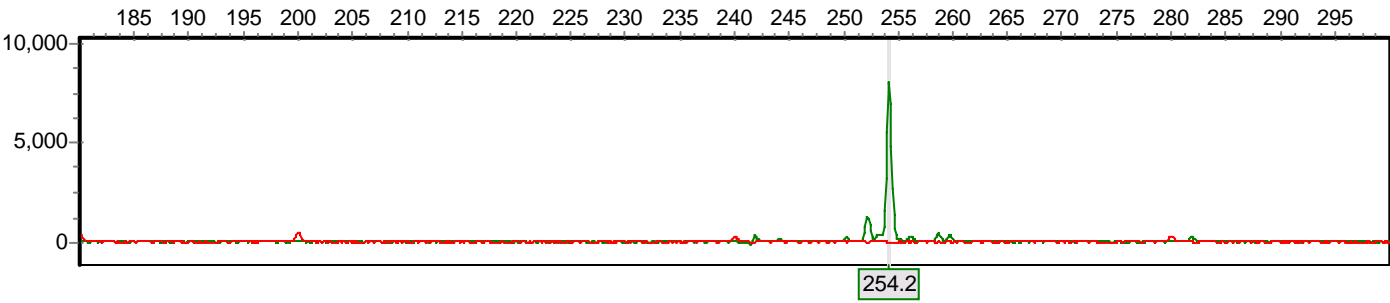

Supplement: s1 [file s1]
