# Supplementary material
Source: MDPI journal article supplement (https://www.mdpi.com/1999-4907/10/3/225)

**Sample 1:** 49\_A07.fsa Run date and time: 01/05/2017 - 09:38:58 -> 01/05/2017 - 10:23:13

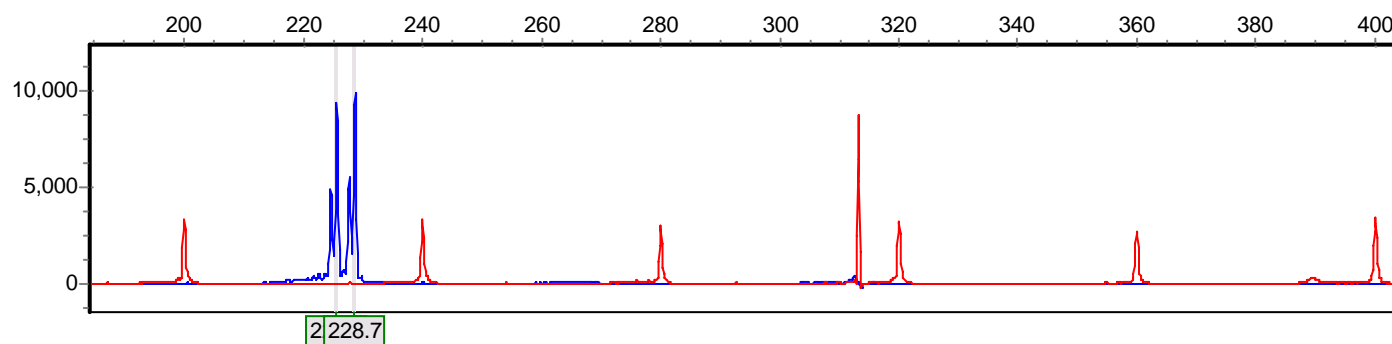

**Sample 2:** 50\_B07.fsa Run date and time: 01/05/2017 - 09:38:58 -> 01/05/2017 - 10:23:13

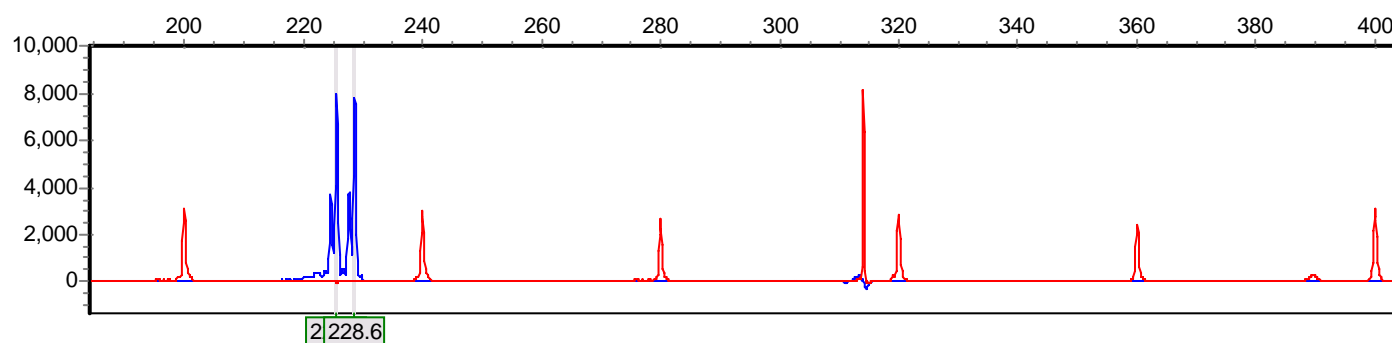

**Sample 3:** 51\_C07.fsa Run date and time: 01/05/2017 - 09:38:58 -> 01/05/2017 - 10:23:13

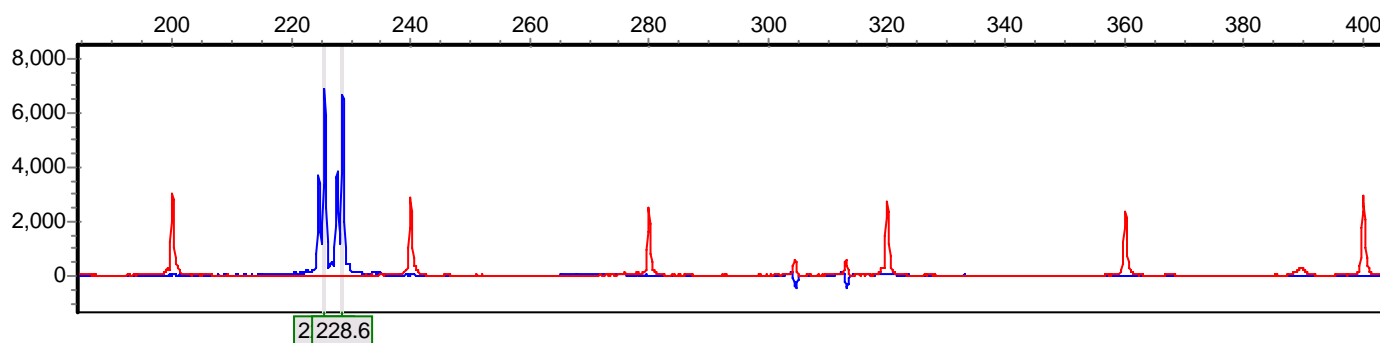

**Sample 4:** 52\_D07.fsa Run date and time: 01/05/2017 - 09:38:58 -> 01/05/2017 - 10:23:13

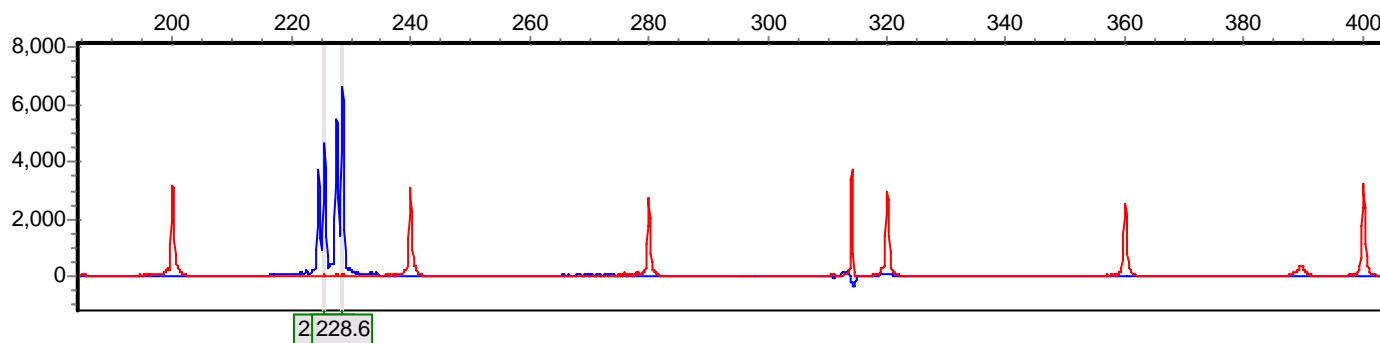

**Sample 5:** 53\_E07.fsa Run date and time: 01/05/2017 - 09:38:58 -> 01/05/2017 - 10:23:13

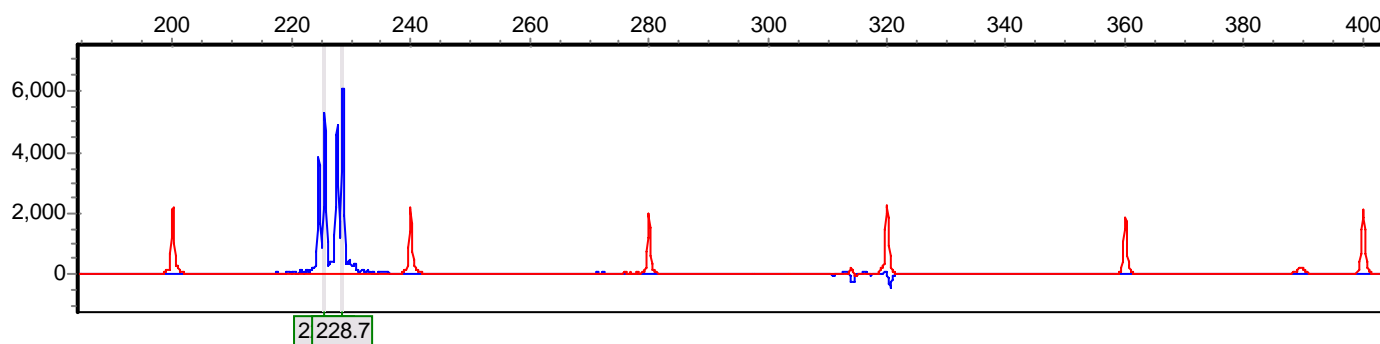

**Sample 6:** 54\_F07.fsa Run date and time: 01/05/2017 - 09:38:58 -> 01/05/2017 - 10:23:13

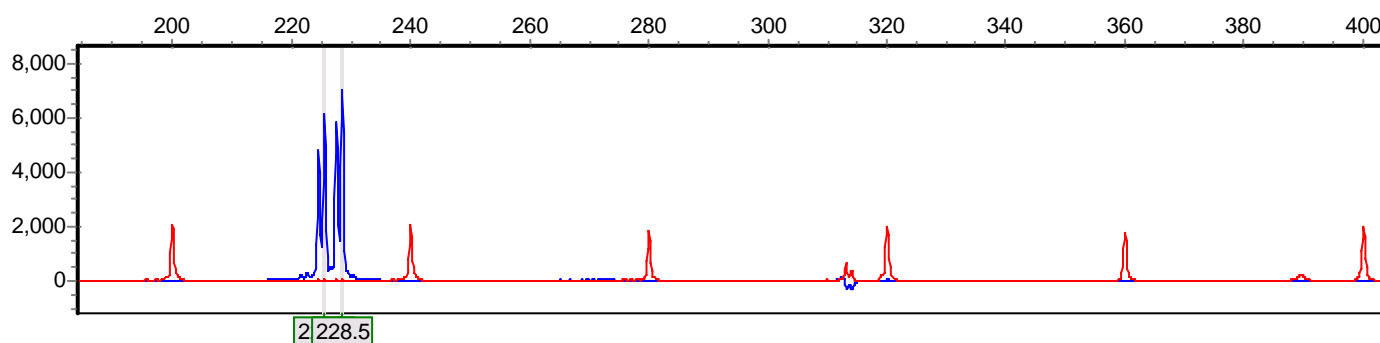

**Sample 7:** 55\_G07.fsa Run date and time: 01/05/2017 - 09:38:58 -> 01/05/2017 - 10:23:13

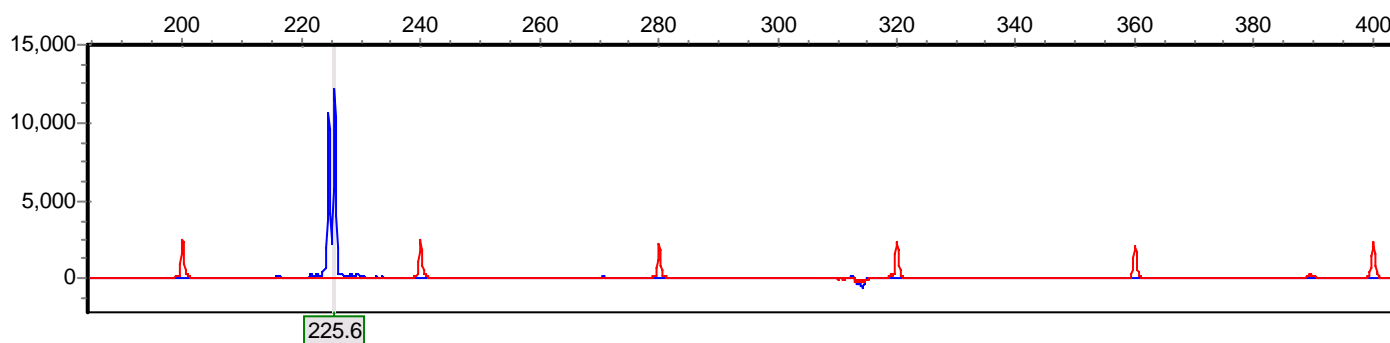

**Sample 8:** 56\_H07.fsa Run date and time: 01/05/2017 - 09:38:58 -> 01/05/2017 - 10:23:13

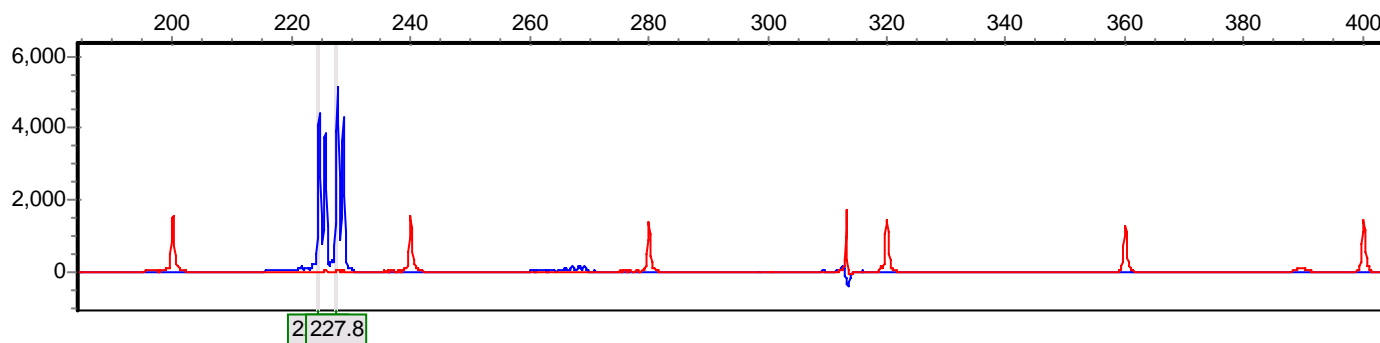

**Sample 9:** 57\_A08.fsa Run date and time: 01/05/2017 - 09:38:58 -> 01/05/2017 - 10:23:13

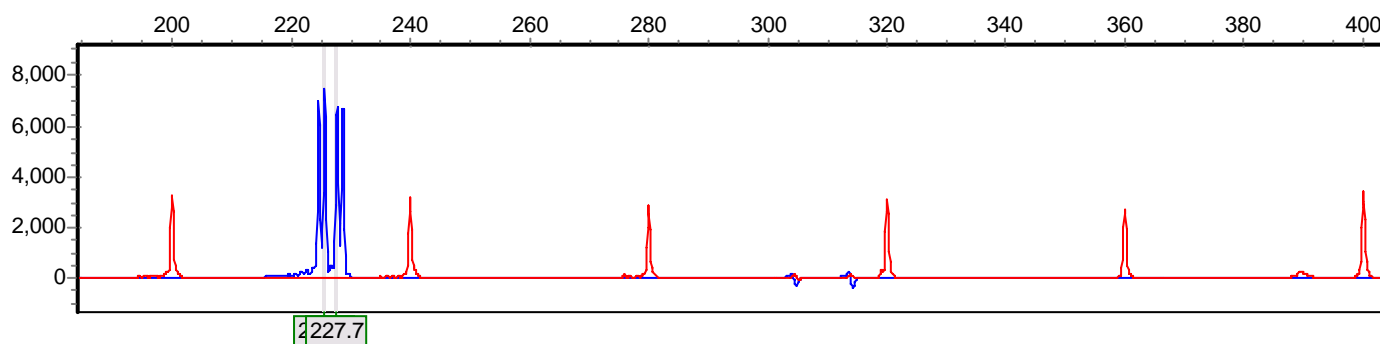

**Sample 1058:** B08.fsa Run date and time: 01/05/2017 - 09:38:58 -> 01/05/2017 - 10:23:13

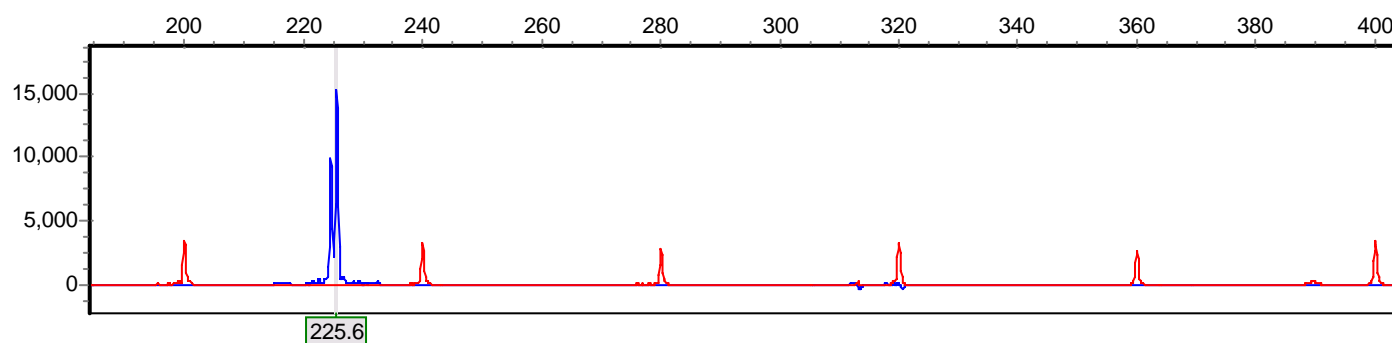

**Sample 1159:** C08.fsa Run date and time: 01/05/2017 - 09:38:58 -> 01/05/2017 - 10:23:13

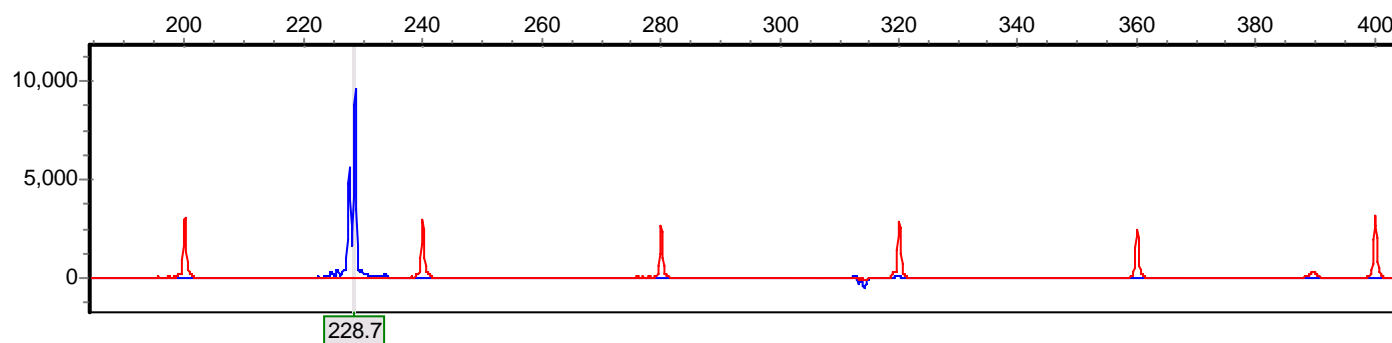

**Sample 1260:** D08.fsa Run date and time: 01/05/2017 - 09:38:58 -> 01/05/2017 - 10:23:13

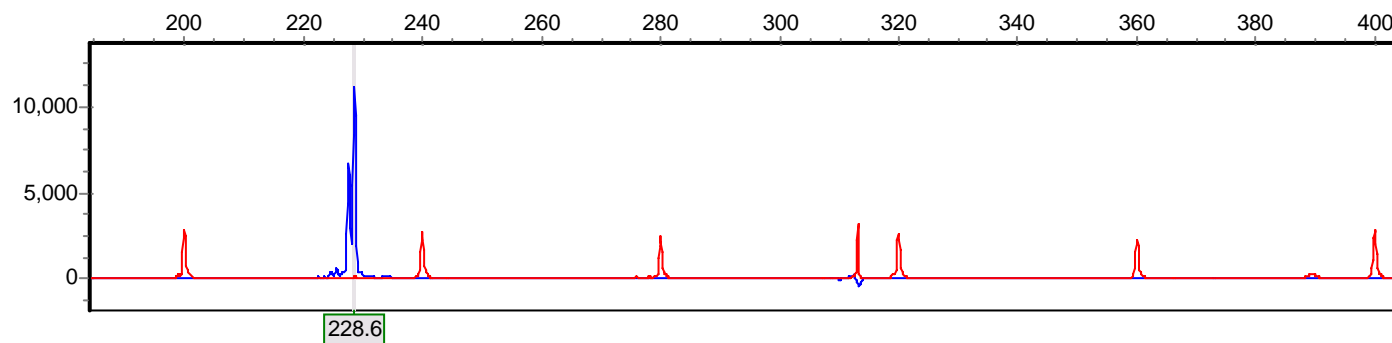

**Sample 13:** 61\_E08.fsa Run date and time: 01/05/2017 - 09:38:58 -> 01/05/2017 - 10:23:13

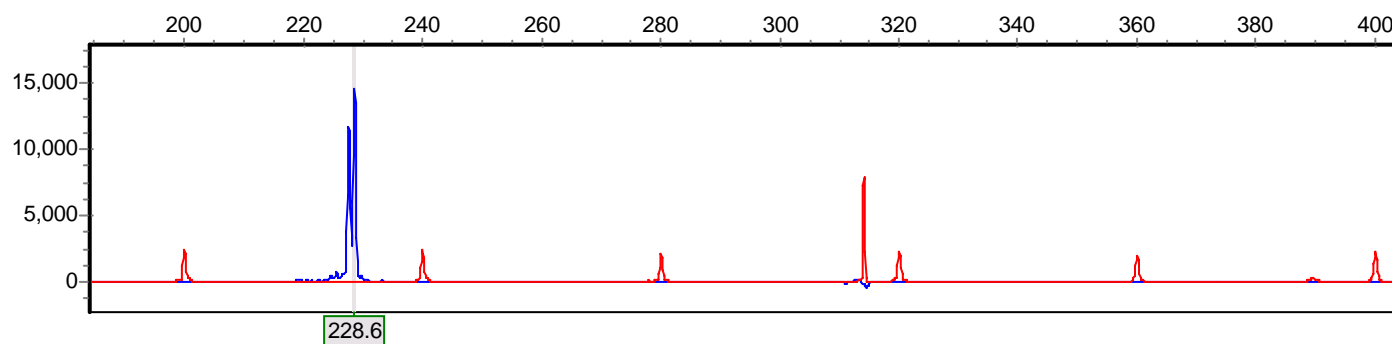

**Sample 14** 62\_F08.fsa Run date and time: 01/05/2017 - 09:38:58 -> 01/05/2017 - 10:23:13

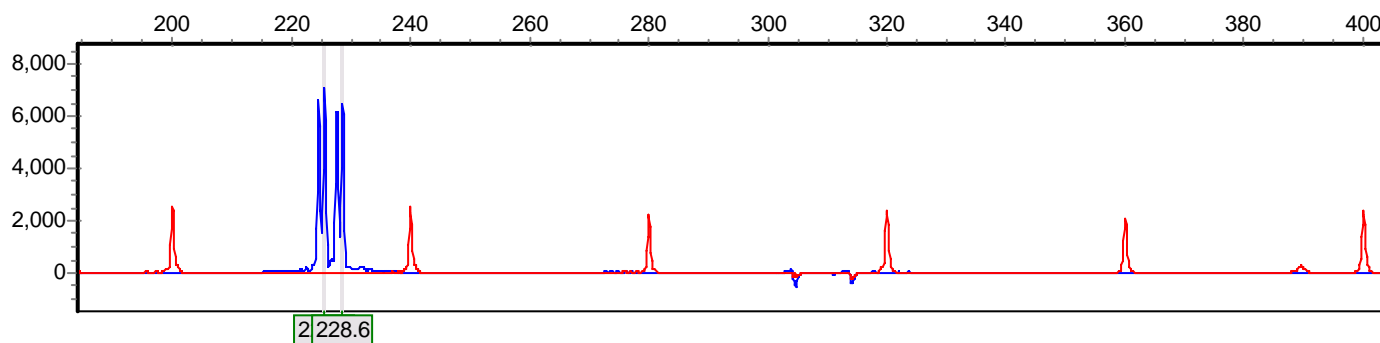

**Sample 15** 63\_G08.fsa Run date and time: 01/05/2017 - 09:38:58 -> 01/05/2017 - 10:23:13

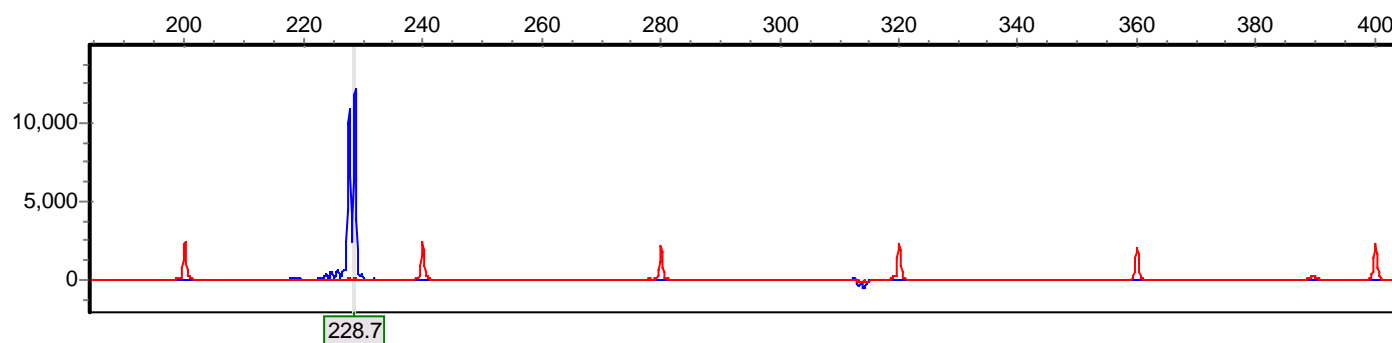

**Sample 16** 64\_H08.fsa Run date and time: 01/05/2017 - 09:38:58 -> 01/05/2017 - 10:23:13

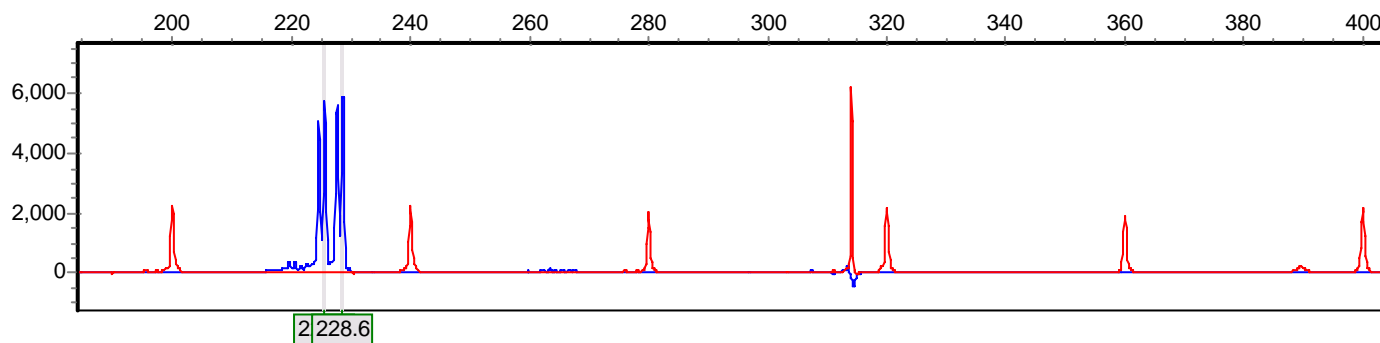

**Sample 17:** 65\_A09.fsa Run date and time: 01/05/2017 - 09:38:58 -> 01/05/2017 - 10:23:13

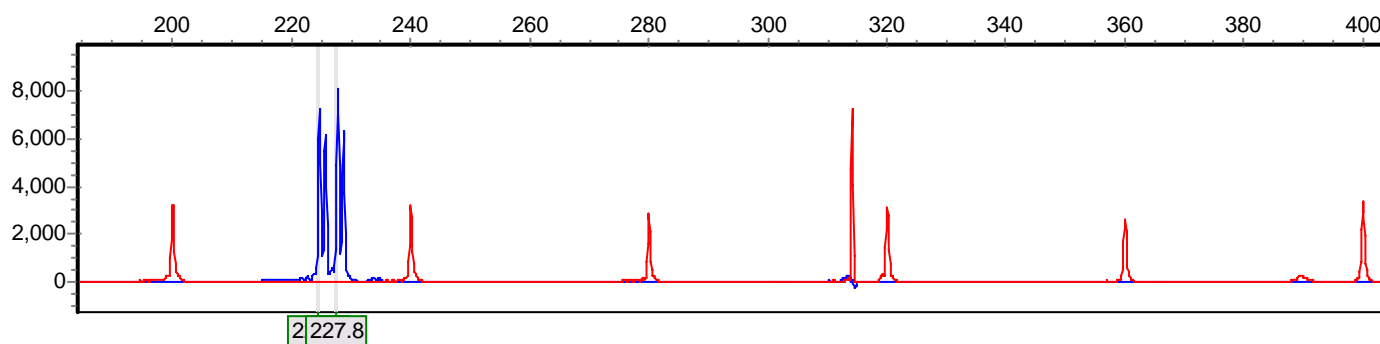

**Sample 18**66\_B09.fsa Run date and time: 01/05/2017 - 09:38:58 -> 01/05/2017 - 10:23:13

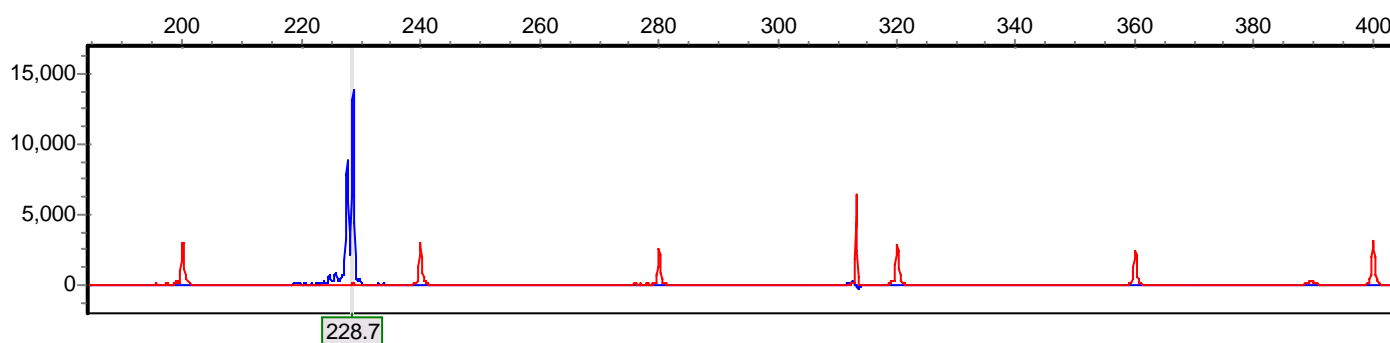

**Sample 19**67\_C09.fsa Run date and time: 01/05/2017 - 09:38:58 -> 01/05/2017 - 10:23:13

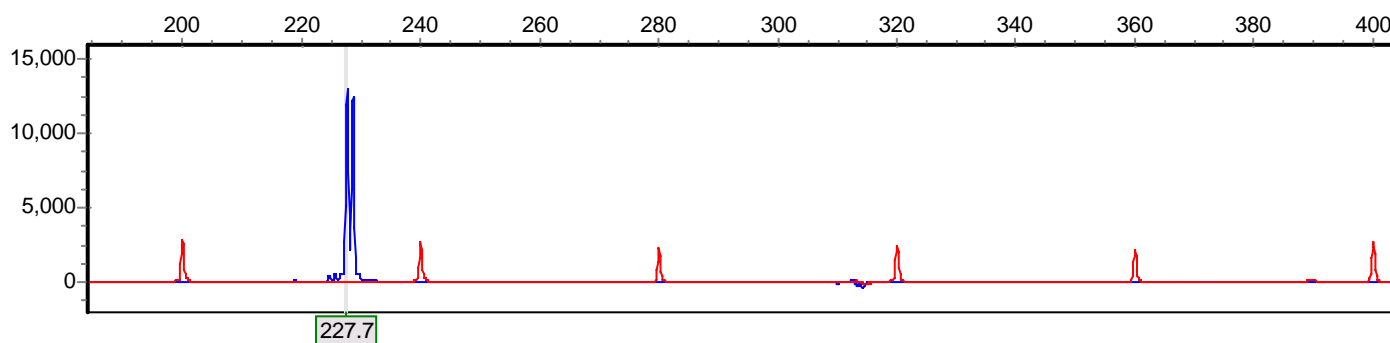

**Sample 20**68\_D09.fsa Run date and time: 01/05/2017 - 09:38:58 -> 01/05/2017 - 10:23:13

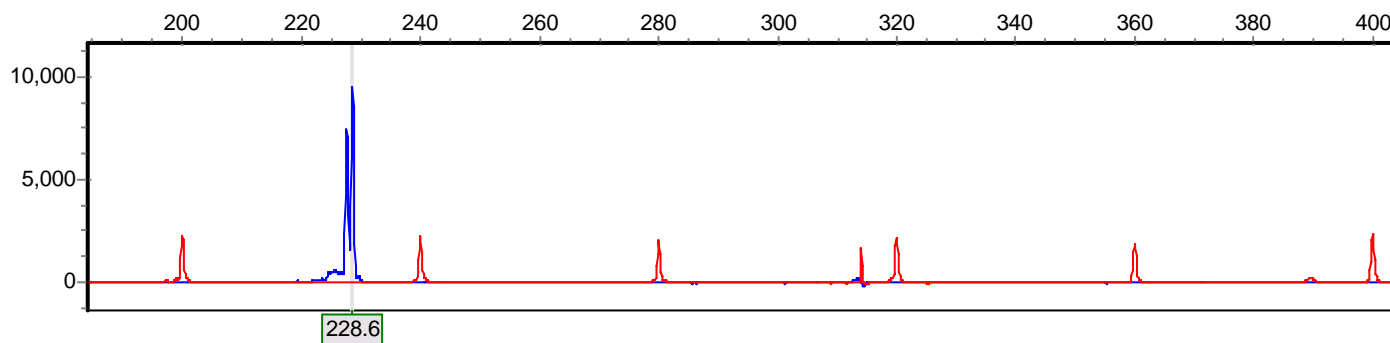

**Sample 21:** 69\_E09.fsa Run date and time: 01/05/2017 - 09:38:58 -> 01/05/2017 - 10:23:13

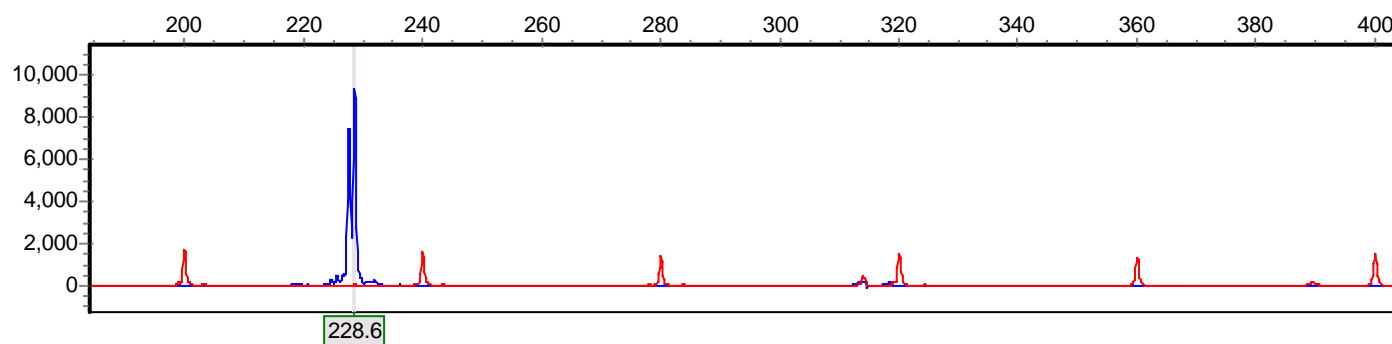

**Sample 2270\_F09.fsa** Run date and time: 01/05/2017 - 09:38:58 -> 01/05/2017 - 10:23:13

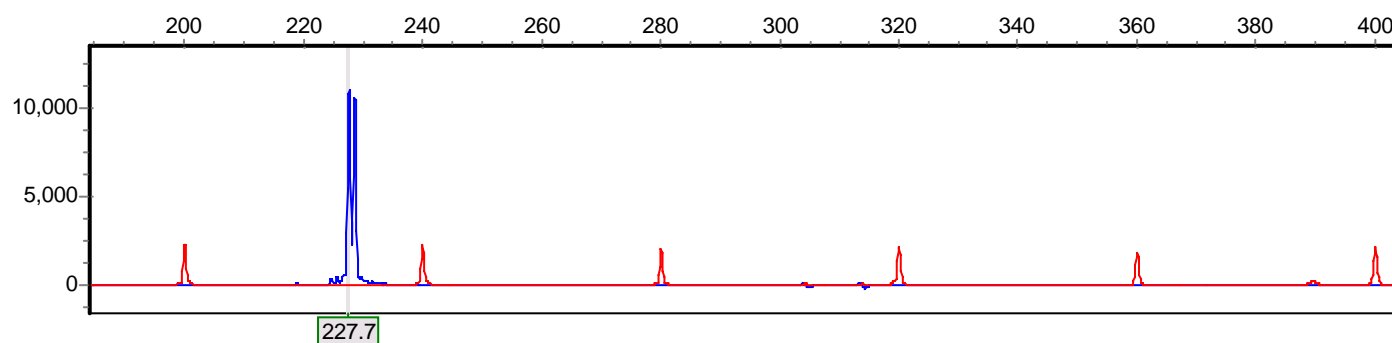

**Sample 2371\_G09.fsa** Run date and time: 01/05/2017 - 09:38:58 -> 01/05/2017 - 10:23:13

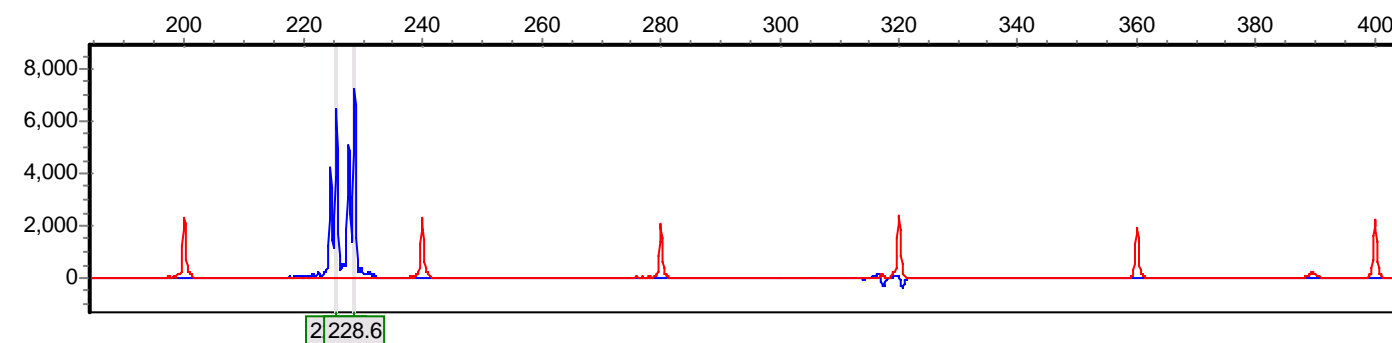

**Sample 2472\_H09.fsa** Run date and time: 01/05/2017 - 09:38:58 -> 01/05/2017 - 10:23:13

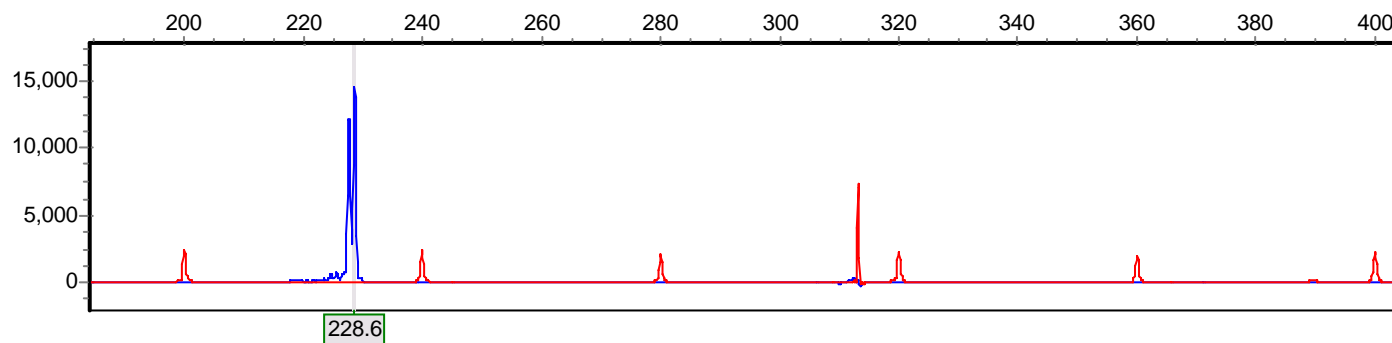

Sample 25: 73\_A10.fsa Run date and time: 01/05/2017 - 09:38:58 -> 01/05/2017 - 10:23:13

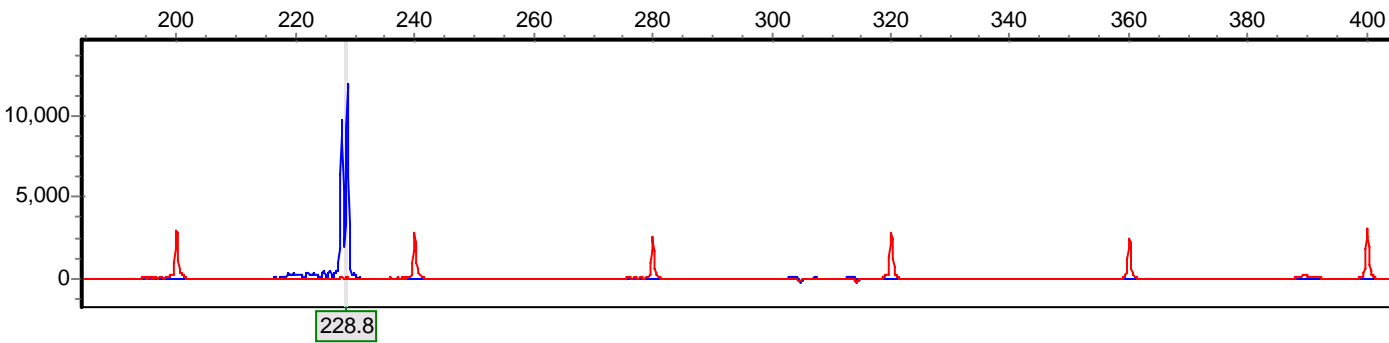

Sample 2674\_B10.fsa Run date and time: 01/05/2017 - 09:38:58 -> 01/05/2017 - 10:23:13

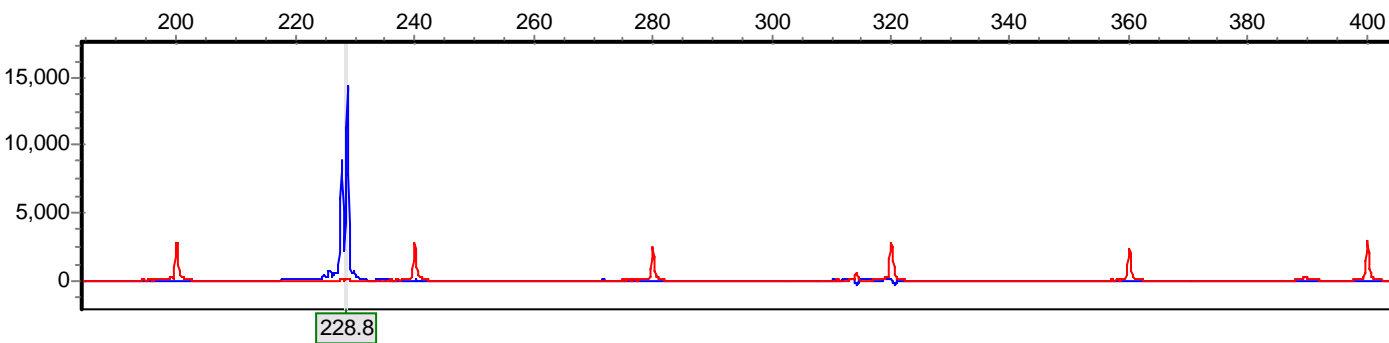

Sample 2775\_C10.fsa Run date and time: 01/05/2017 - 09:38:58 -> 01/05/2017 - 10:23:13

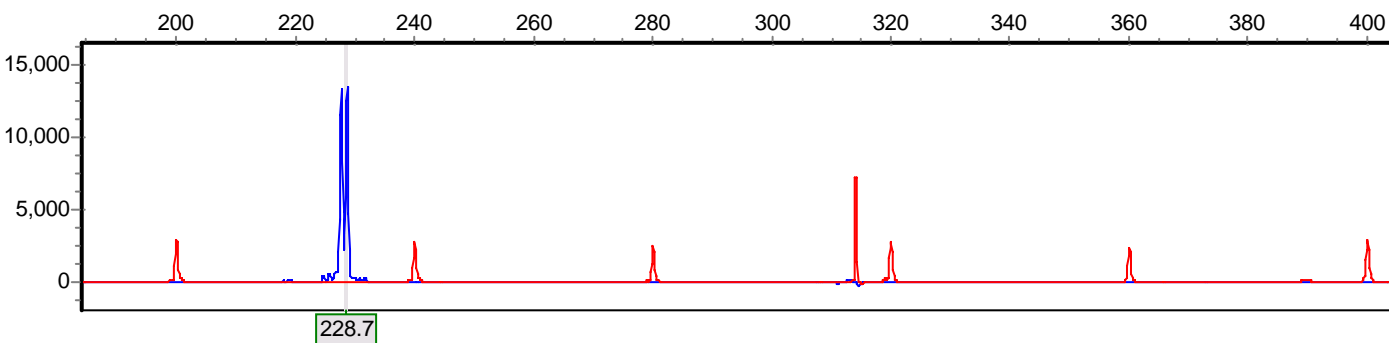

Sample 2876\_D10.fsa Run date and time: 01/05/2017 - 09:38:58 -> 01/05/2017 - 10:23:13

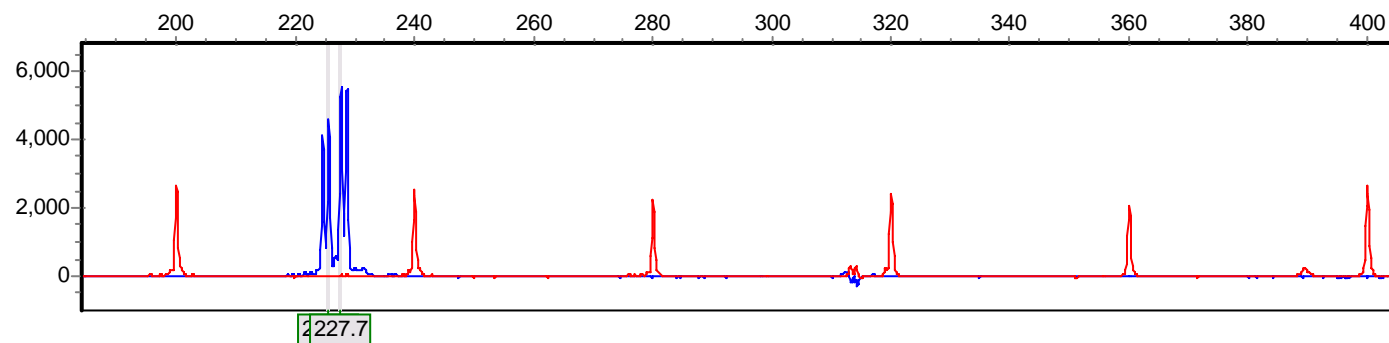

**Sample 29:** 77\_E10.fsa Run date and time: 01/05/2017 - 09:38:58 -> 01/05/2017 - 10:23:13

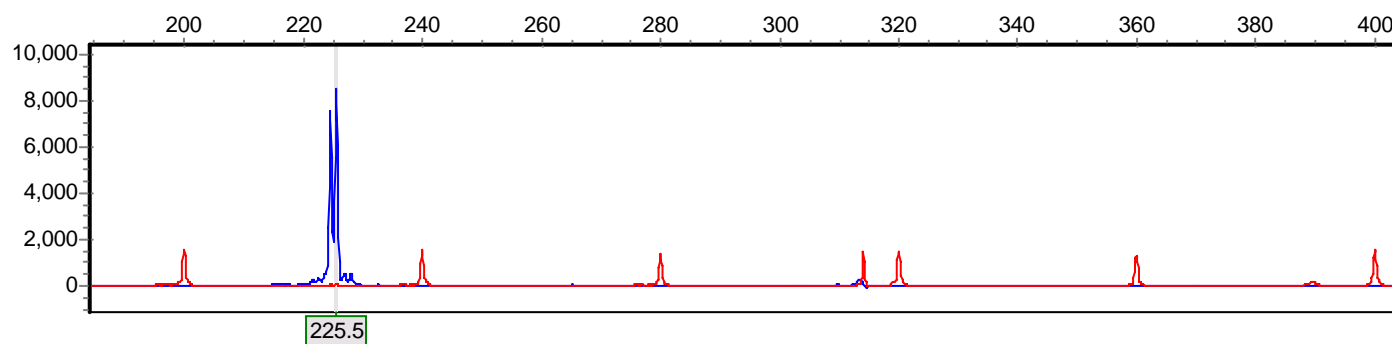

**Sample 30** 78\_F10.fsa Run date and time: 01/05/2017 - 09:38:58 -> 01/05/2017 - 10:23:13

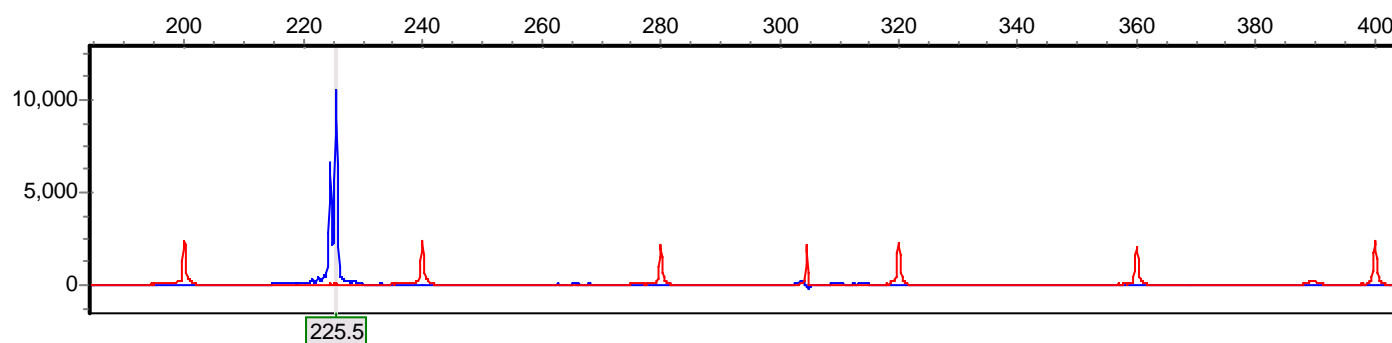

**Sample 31** 79\_G10.fsa Run date and time: 01/05/2017 - 09:38:58 -> 01/05/2017 - 10:23:13

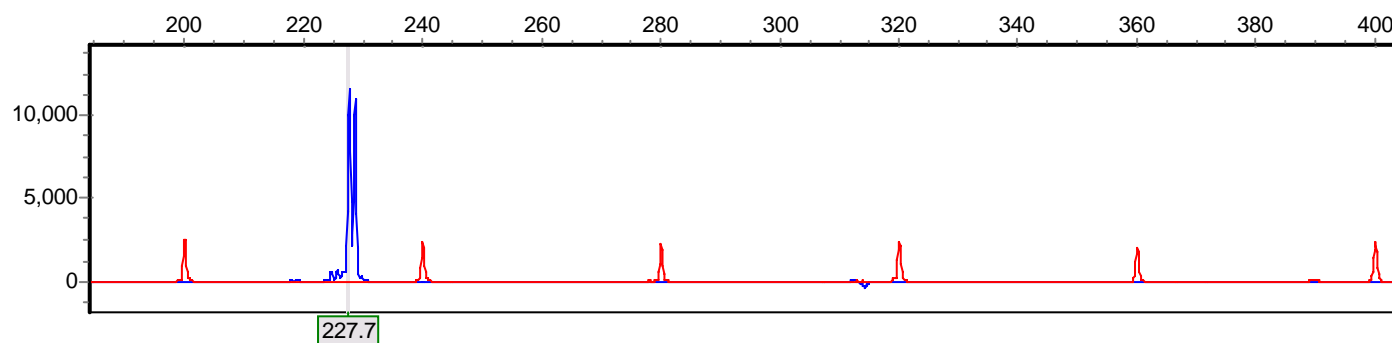

**Sample 32** 80\_H10.fsa Run date and time: 01/05/2017 - 09:38:58 -> 01/05/2017 - 10:23:13

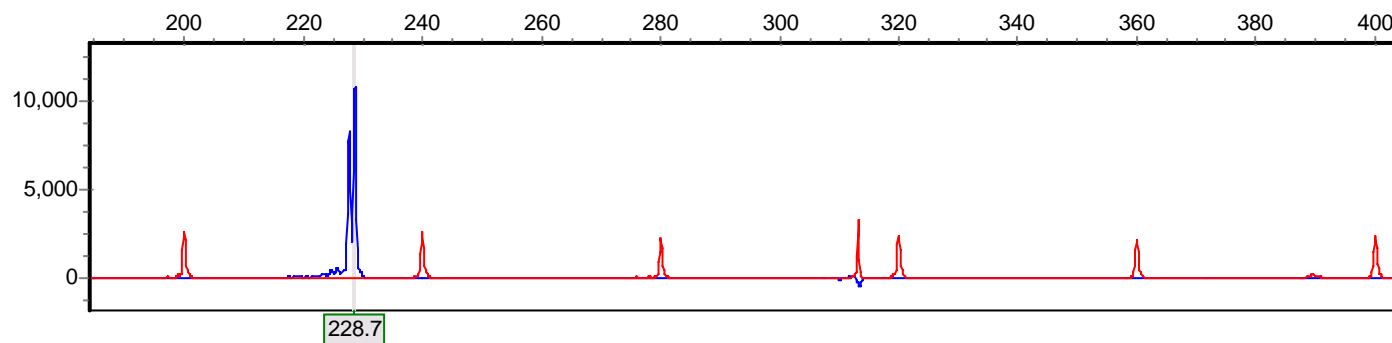



**Sample 33:** 81\_A11.fsa Run date and time: 01/05/2017 - 09:38:58 -> 01/05/2017 - 10:23:13

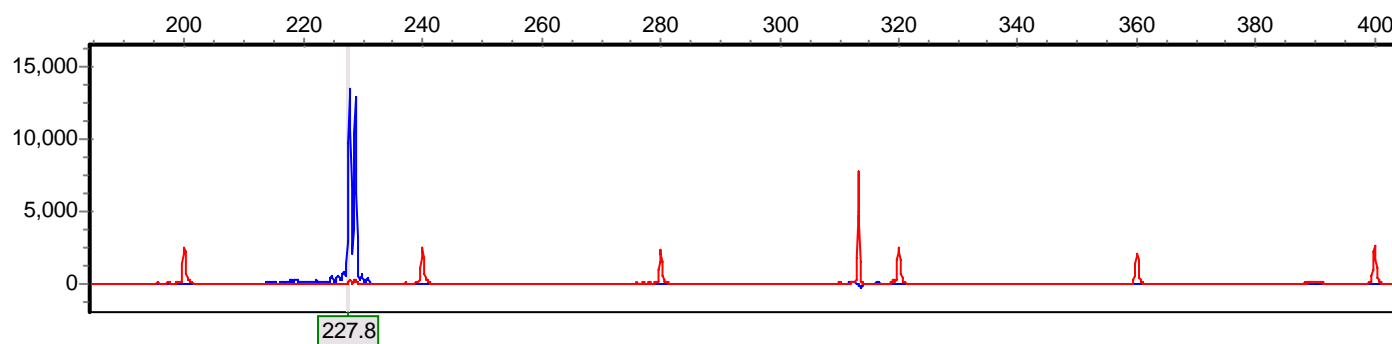

**Sample 3482\_B11.fsa** Run date and time: 01/05/2017 - 09:38:58 -> 01/05/2017 - 10:23:13

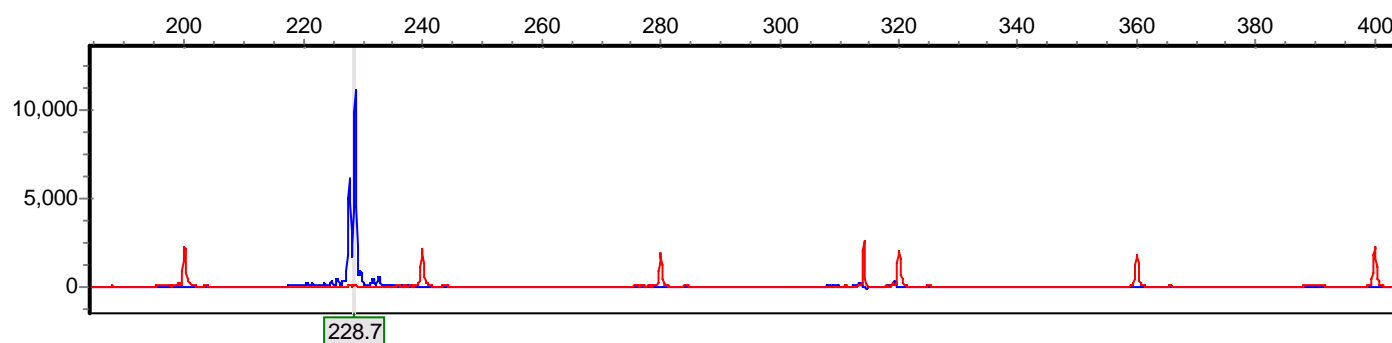

**Sample 3583\_C11.fsa** Run date and time: 01/05/2017 - 09:38:58 -> 01/05/2017 - 10:23:13

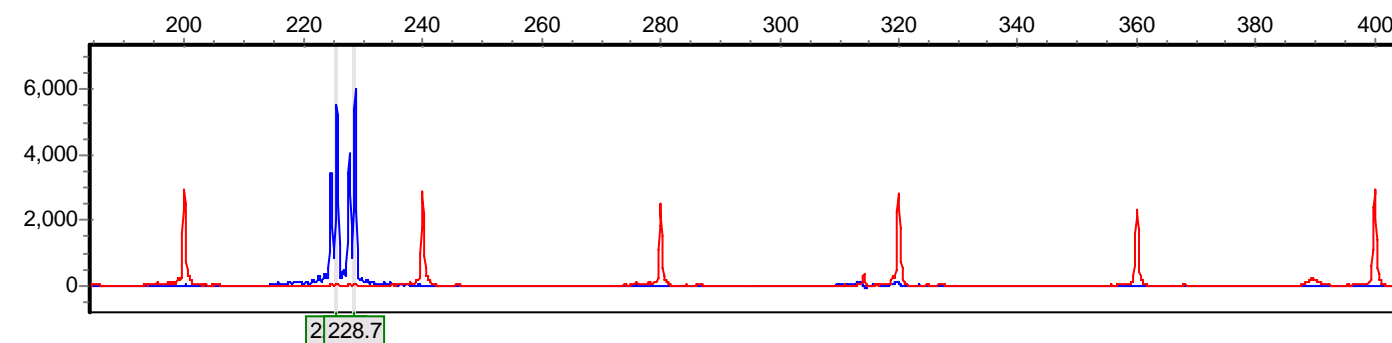

**Sample 3684\_D11.fsa** Run date and time: 01/05/2017 - 09:38:58 -> 01/05/2017 - 10:23:13

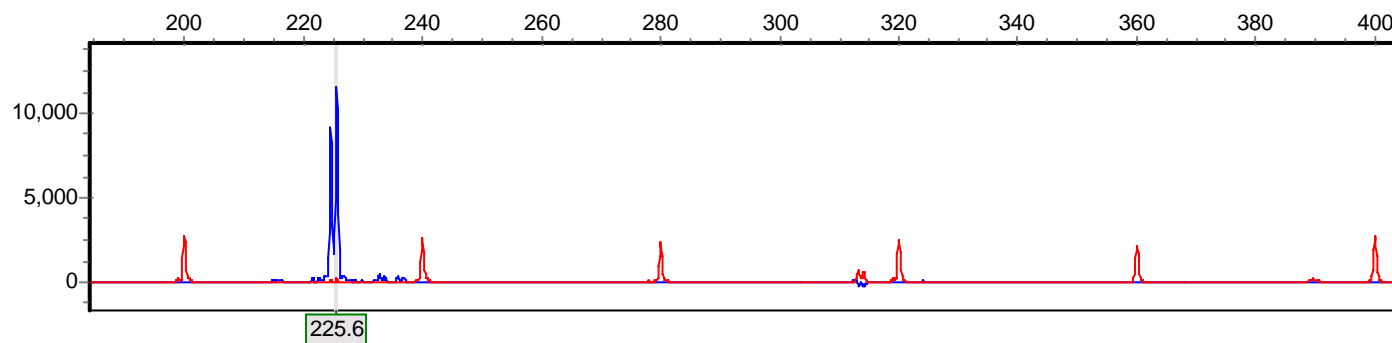

**Sample 37:** 85\_E11.fsa Run date and time: 01/05/2017 - 09:38:58 -> 01/05/2017 - 10:23:13

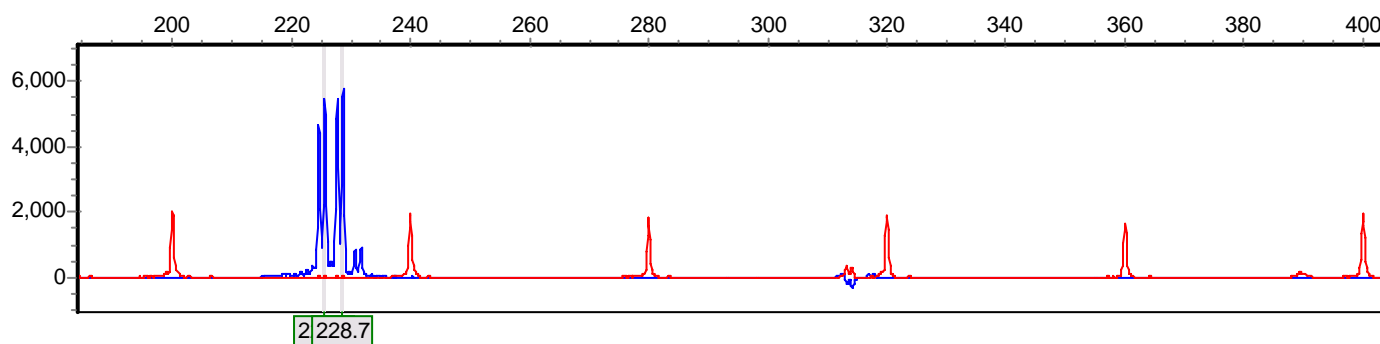

**Sample 38**86\_F11.fsa Run date and time: 01/05/2017 - 09:38:58 -> 01/05/2017 - 10:23:13

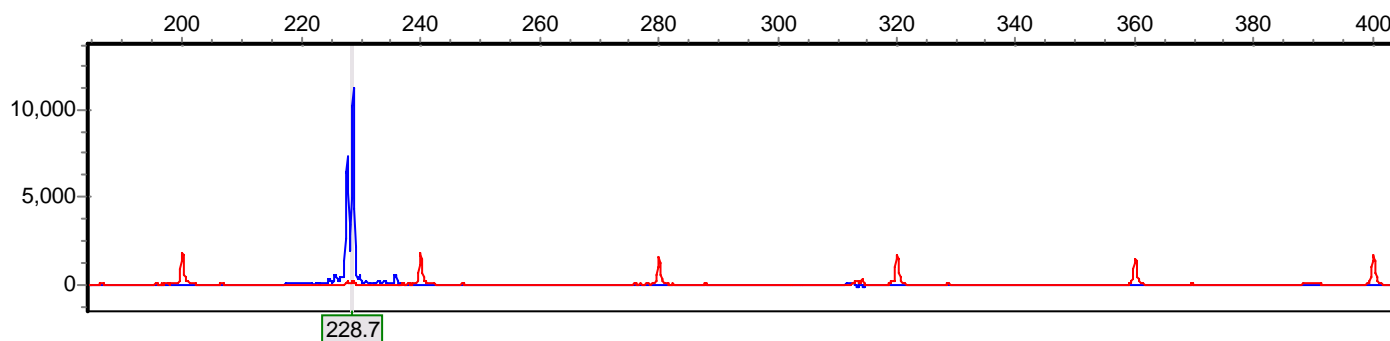

**Sample 39**87\_G11.fsa Run date and time: 01/05/2017 - 09:38:58 -> 01/05/2017 - 10:23:13

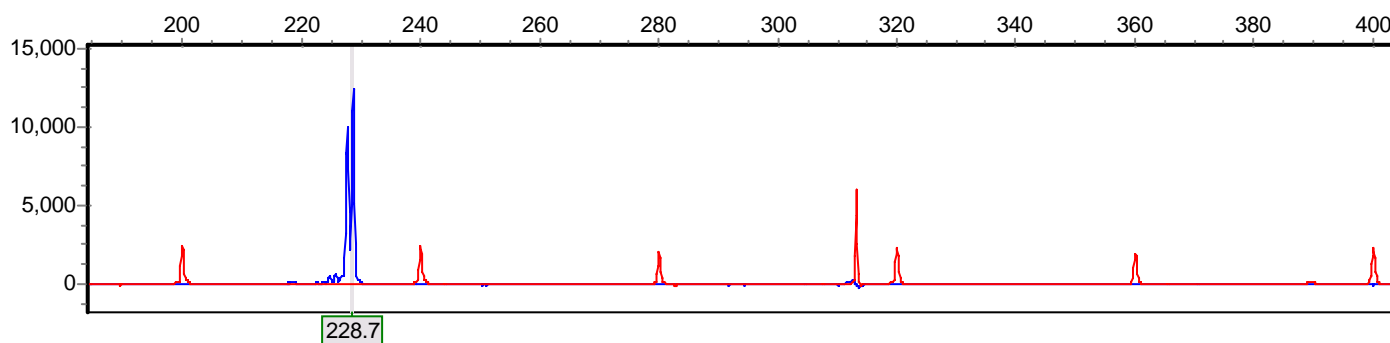

**Sample 40**88\_H11.fsa Run date and time: 01/05/2017 - 09:38:58 -> 01/05/2017 - 10:23:13

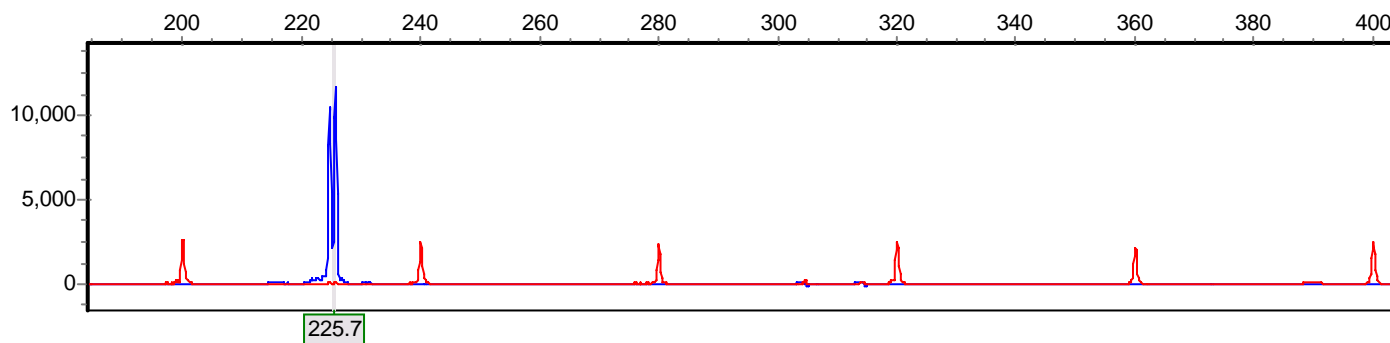

**Sample 41:** 89\_A12.fsa Run date and time: 01/05/2017 - 09:38:58 -> 01/05/2017 - 10:23:13

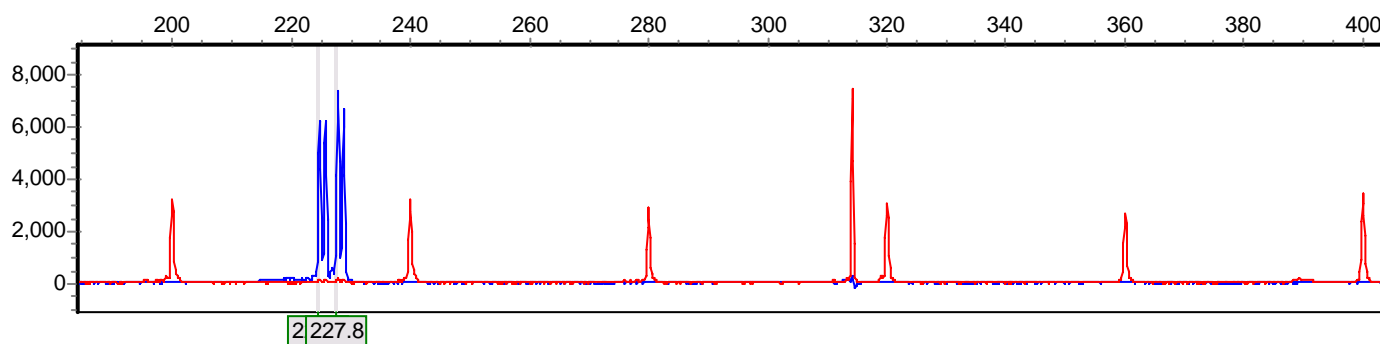

**Sample 4290\_B12.fsa** Run date and time: 01/05/2017 - 09:38:58 -> 01/05/2017 - 10:23:13

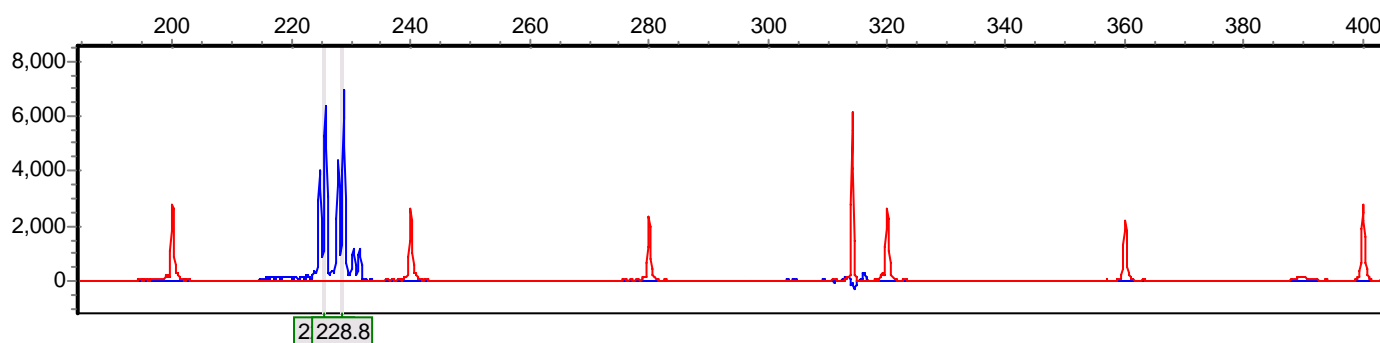

**Sample 4391\_C12.fsa** Run date and time: 01/05/2017 - 09:38:58 -> 01/05/2017 - 10:23:13

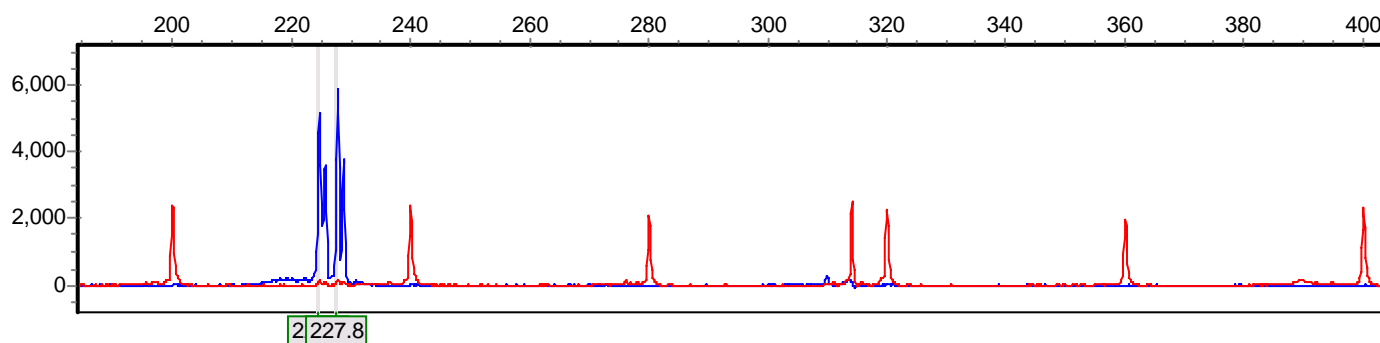

**Sample 4492\_D12.fsa** Run date and time: 01/05/2017 - 09:38:58 -> 01/05/2017 - 10:23:13

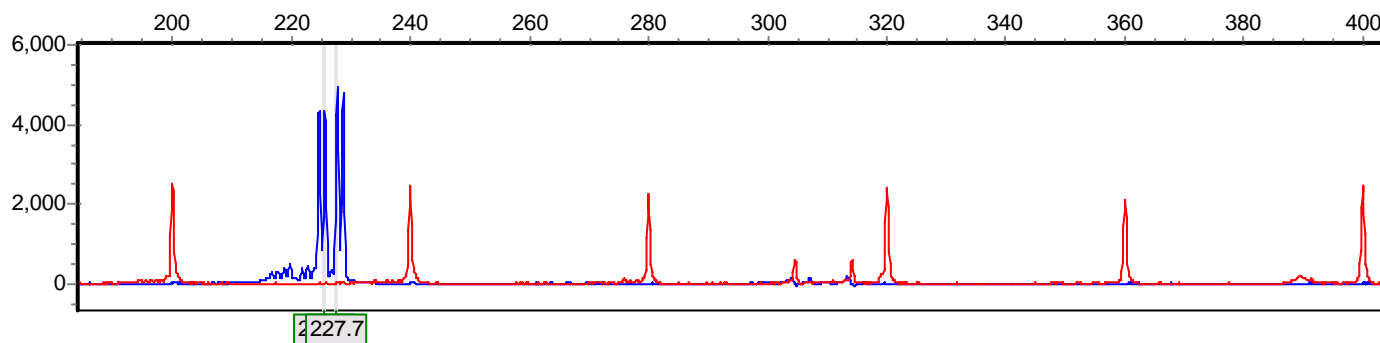

**Sample 45:** 93\_E12.fsa Run date and time: 01/05/2017 - 09:38:58 -> 01/05/2017 - 10:23:13

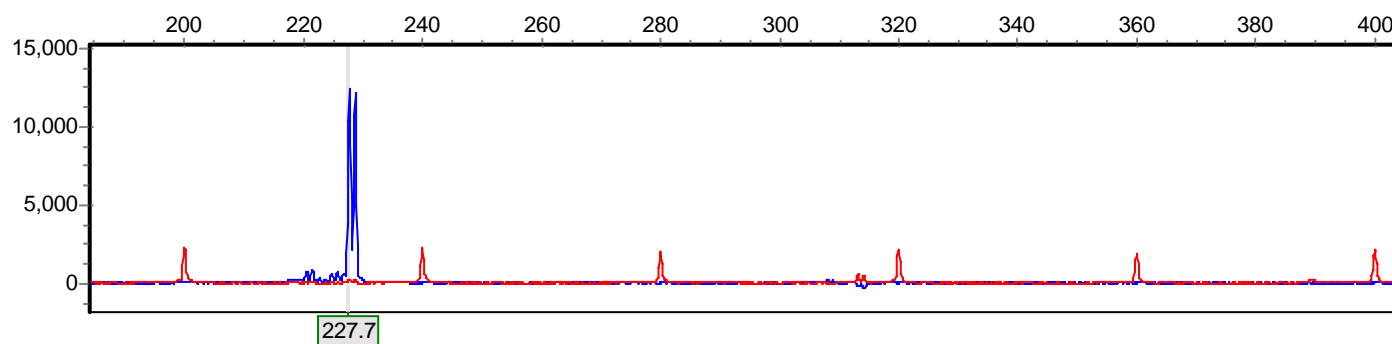

**Sample 46**94\_F12.fsa Run date and time: 01/05/2017 - 09:38:58 -> 01/05/2017 - 10:23:13

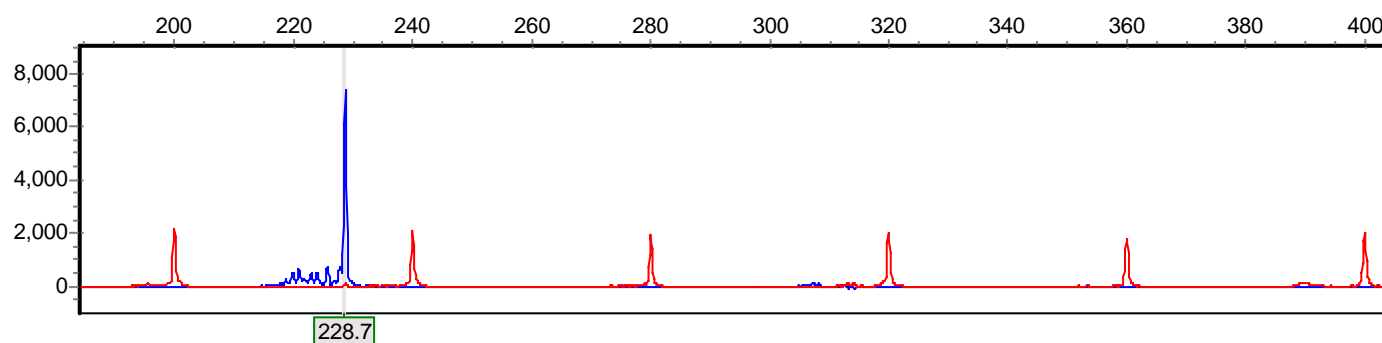

**Sample 47**H100.fsa Run date and time: 12/31/2016 - 12:23:44 -> 12/31/2016 - 13:07:04

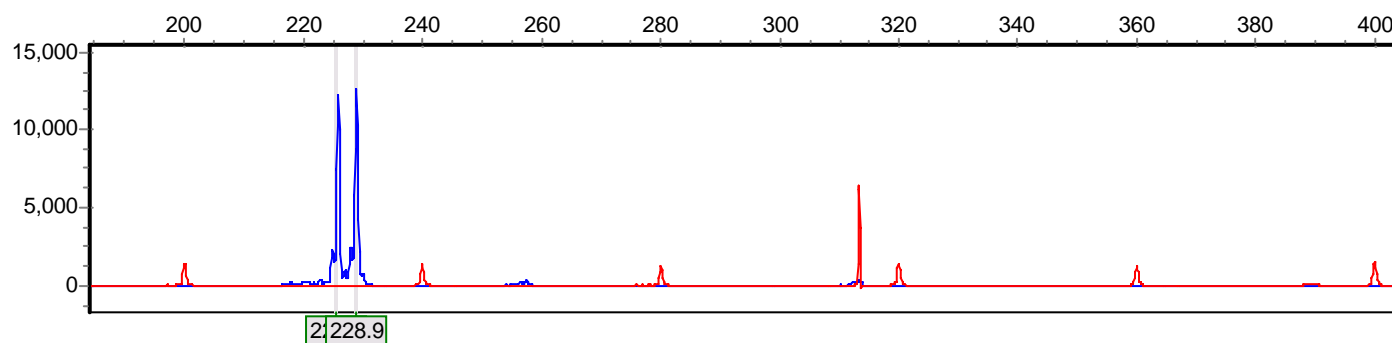

**Sample 48**H102.fsa Run date and time: 12/31/2016 - 12:23:44 -> 12/31/2016 - 13:07:04

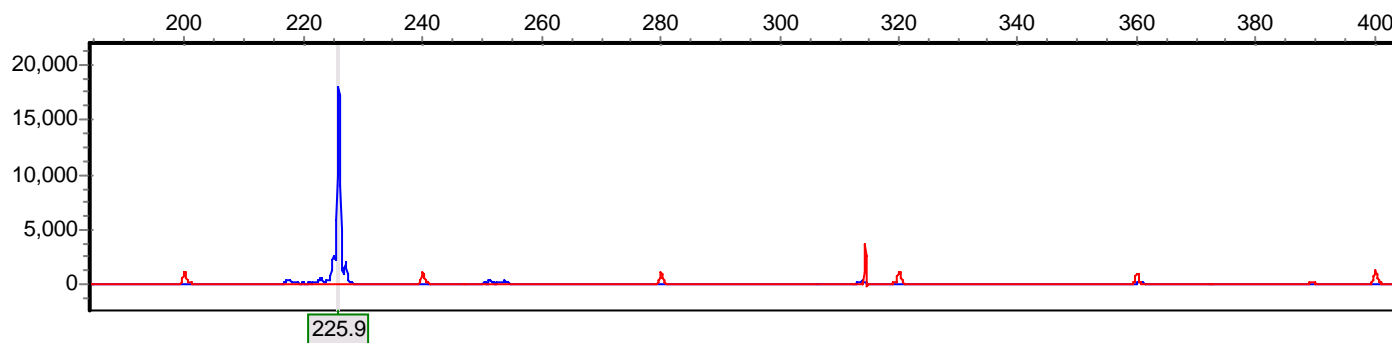

**Sample 49:** H106.fsa Run date and time: 12/31/2016 - 12:23:44 -> 12/31/2016 - 13:07:04

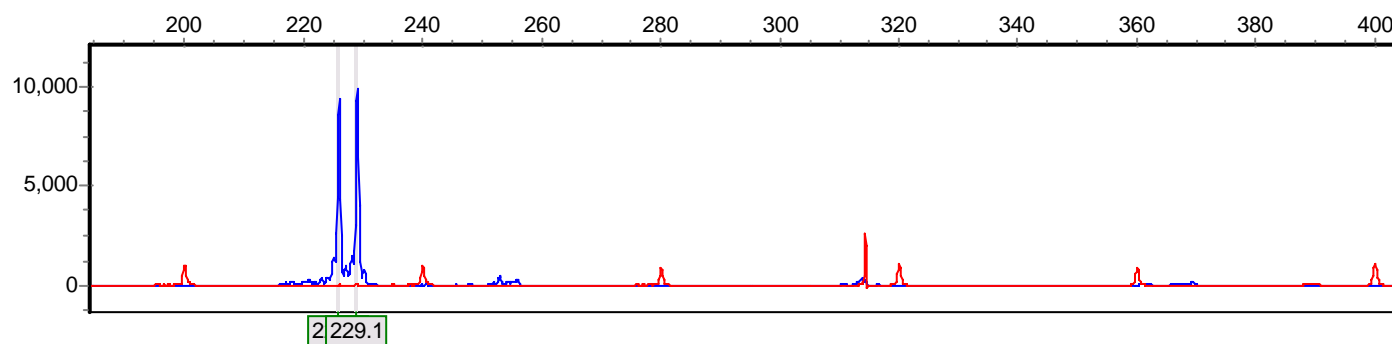

**Sample 50**H107.fsa Run date and time: 12/31/2016 - 12:23:44 -> 12/31/2016 - 13:07:04

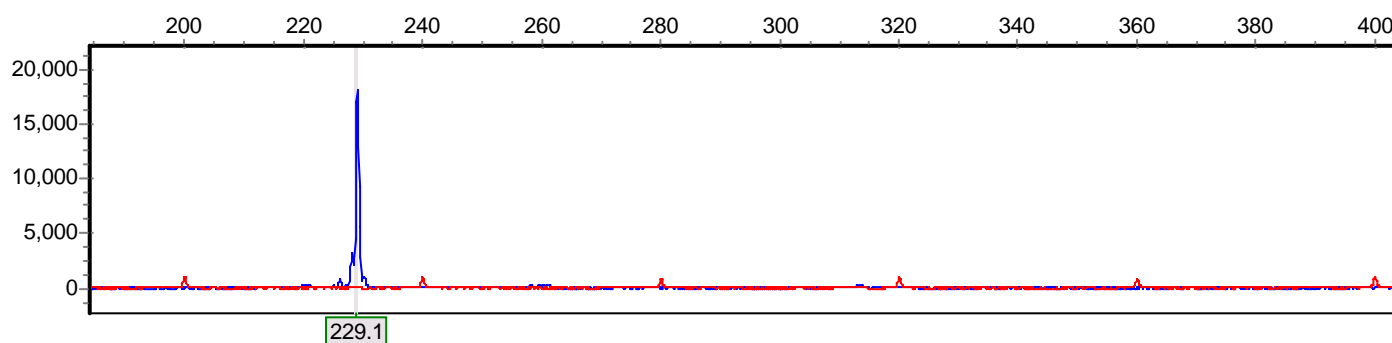

**Sample 51**H108.fsa Run date and time: 12/31/2016 - 12:23:44 -> 12/31/2016 - 13:07:04

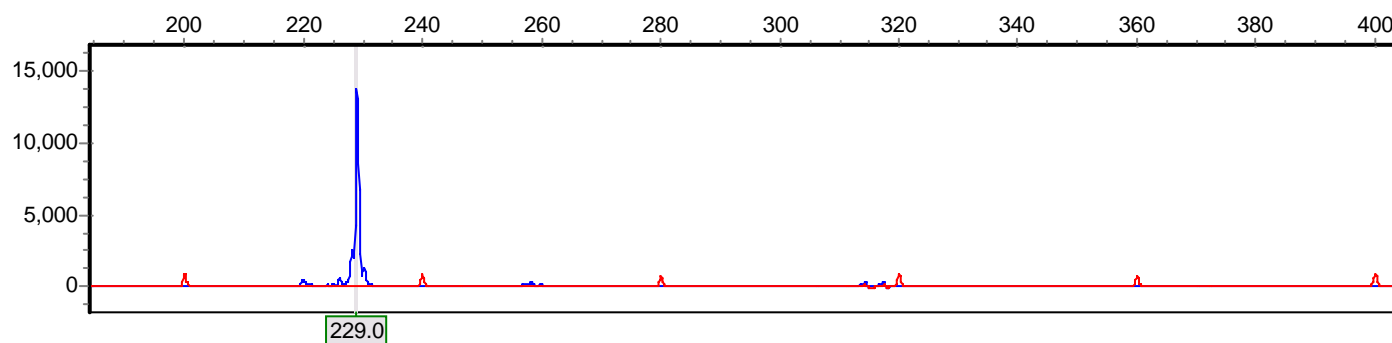

**Sample 52**H110.fsa Run date and time: 12/31/2016 - 12:23:44 -> 12/31/2016 - 13:07:04

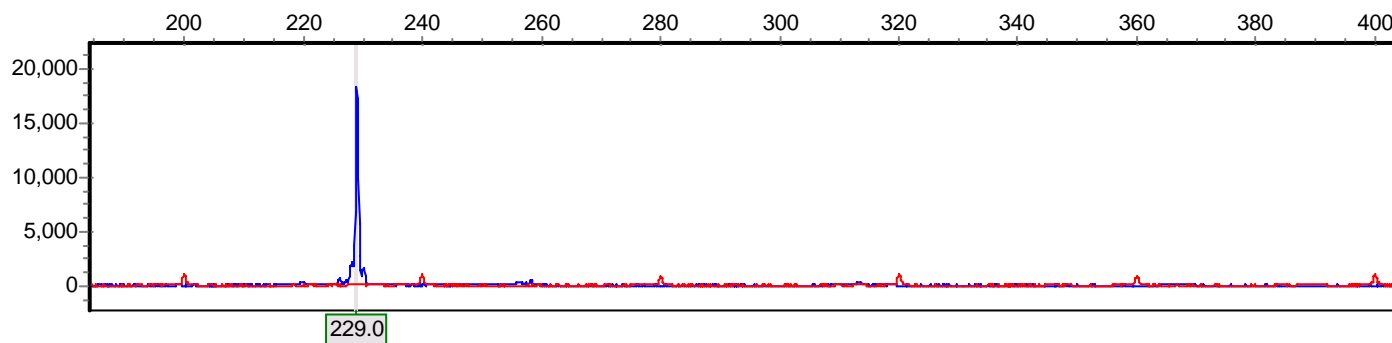

Sample 53: H111.fsa    Run date and time: 12/31/2016 - 12:23:44 -> 12/31/2016 - 13:07:04

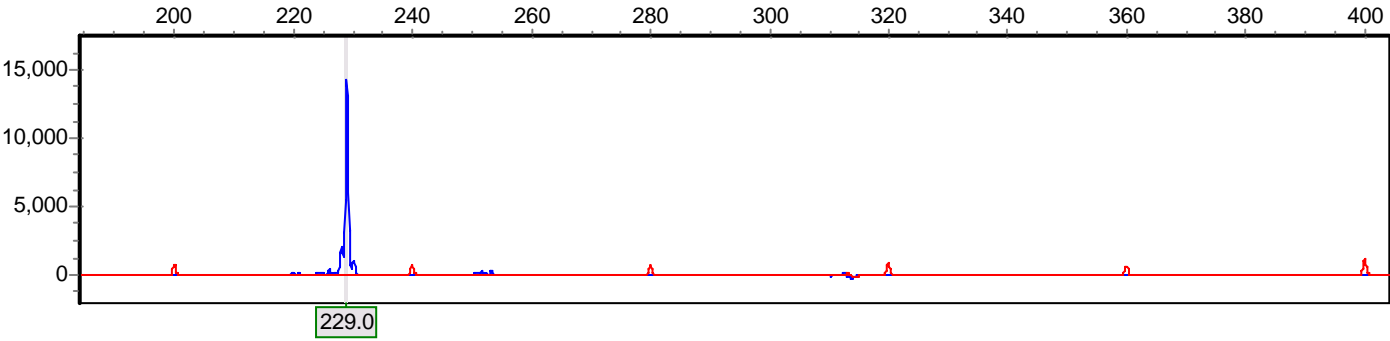

Supplement: s1 [file s1]
