# Supplementary material
Source: MDPI journal article supplement (https://www.mdpi.com/1999-4907/10/3/225)

**Sample 1:** 49\_A07.fsa Run date and time: 01/05/2017 - 10:23:59 -> 01/05/2017 - 11:07:48

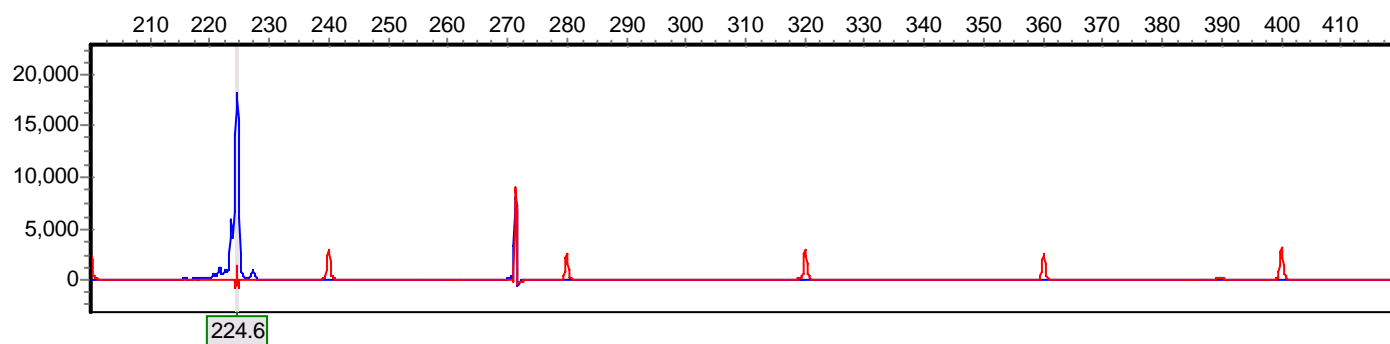

**Sample 2:** 50\_B07.fsa Run date and time: 01/05/2017 - 10:23:59 -> 01/05/2017 - 11:07:48

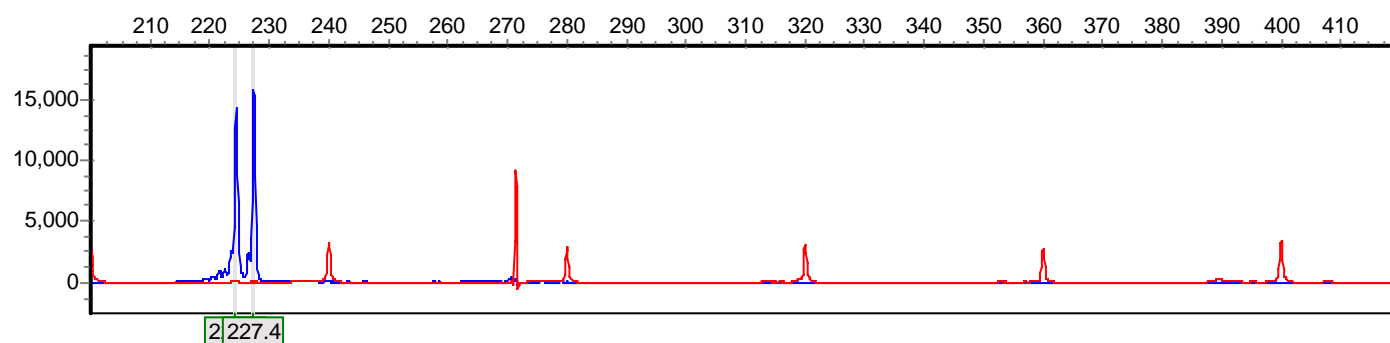

**Sample 3:** 51\_C07.fsa Run date and time: 01/05/2017 - 10:23:59 -> 01/05/2017 - 11:07:48

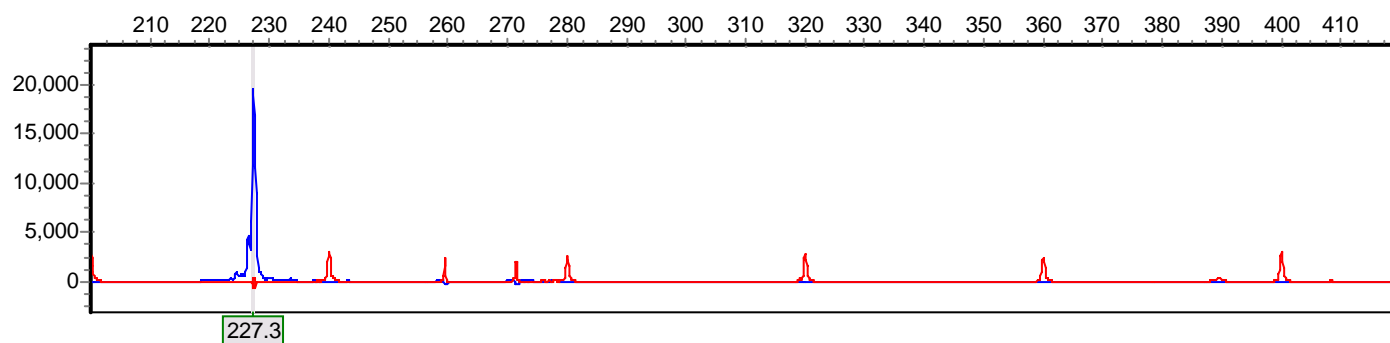

**Sample 4:** 52\_D07.fsa Run date and time: 01/05/2017 - 10:23:59 -> 01/05/2017 - 11:07:48

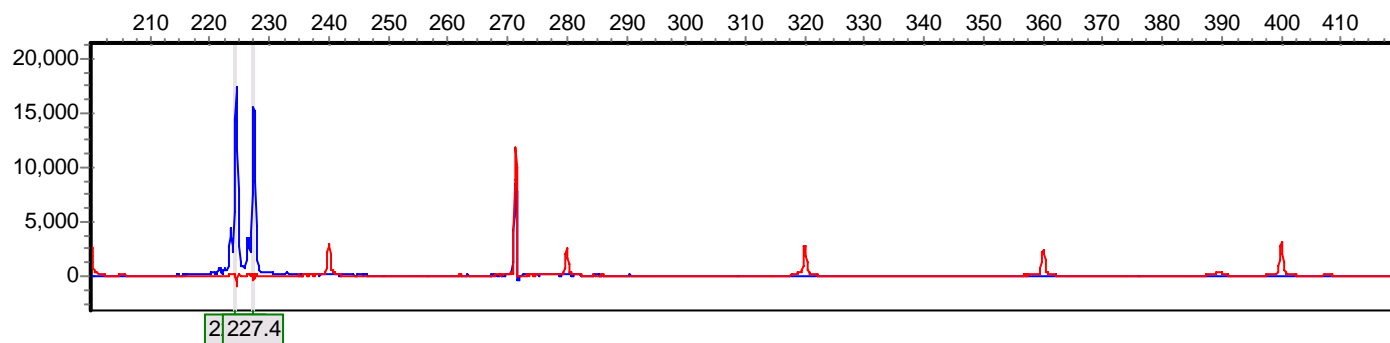

Sample 5: 53\_E07.fsa    Run date and time: 01/05/2017 - 10:23:59 -> 01/05/2017 - 11:07:48

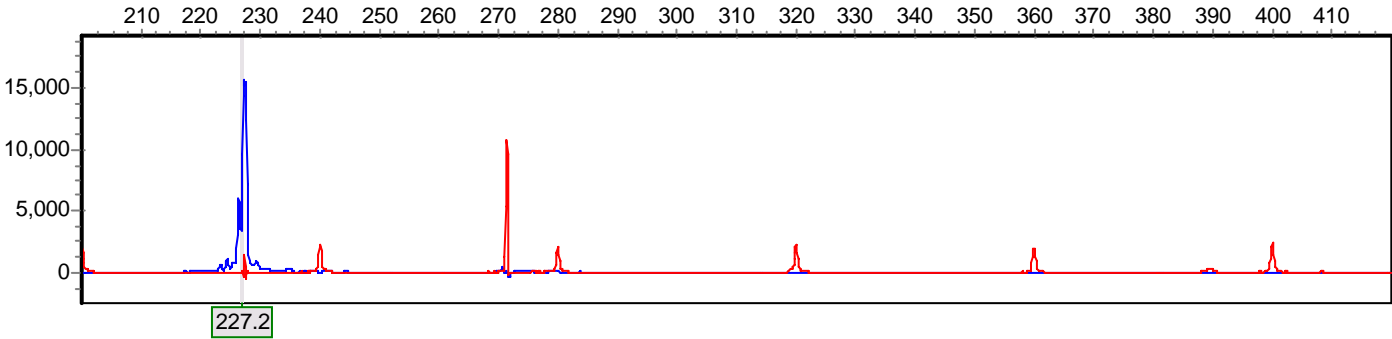

Sample 6: 54\_F07.fsa    Run date and time: 01/05/2017 - 10:23:59 -> 01/05/2017 - 11:07:48

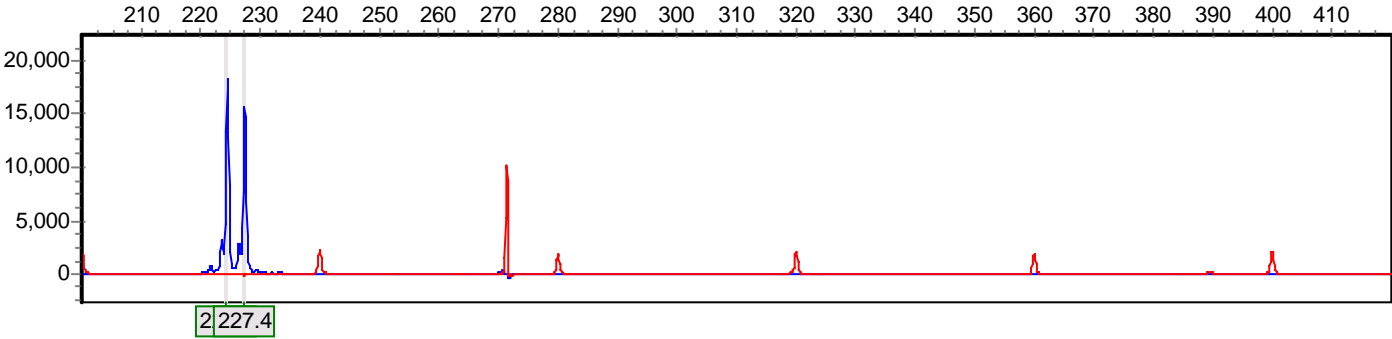

Sample 7: 55\_G07.fsa    Run date and time: 01/05/2017 - 10:23:59 -> 01/05/2017 - 11:07:48

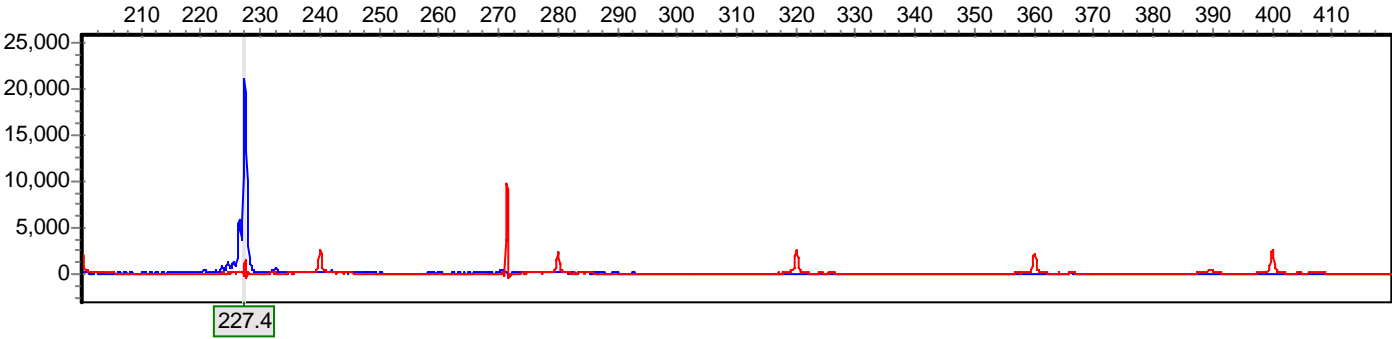

Sample 8: 56\_H07.fsa    Run date and time: 01/05/2017 - 10:23:59 -> 01/05/2017 - 11:07:48

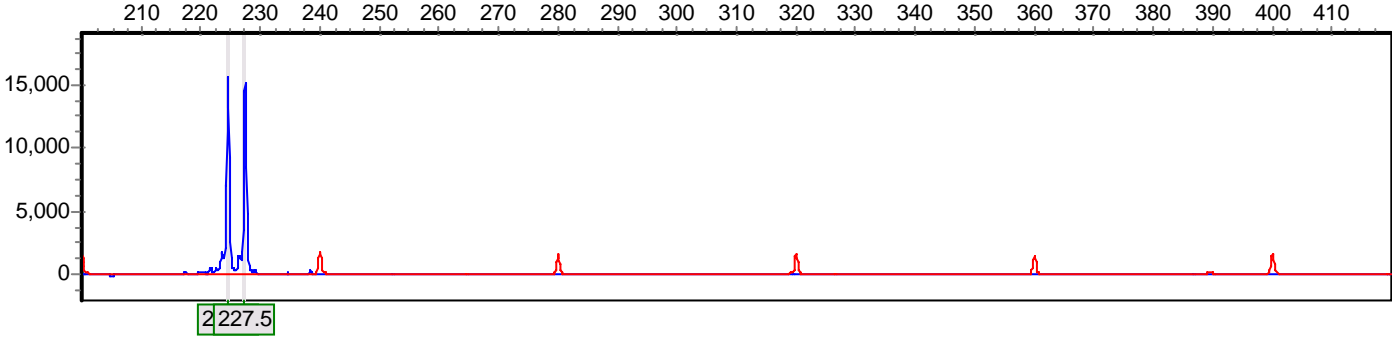

**Sample 9:** 57\_A08.fsa Run date and time: 01/05/2017 - 10:23:59 -> 01/05/2017 - 11:07:48

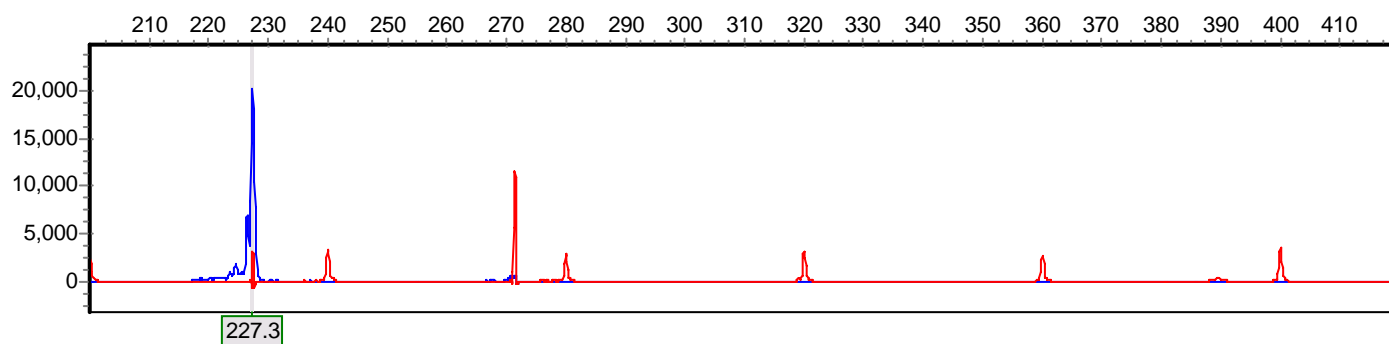

**Sample 1058\_B08.fsa** Run date and time: 01/05/2017 - 10:23:59 -> 01/05/2017 - 11:07:48

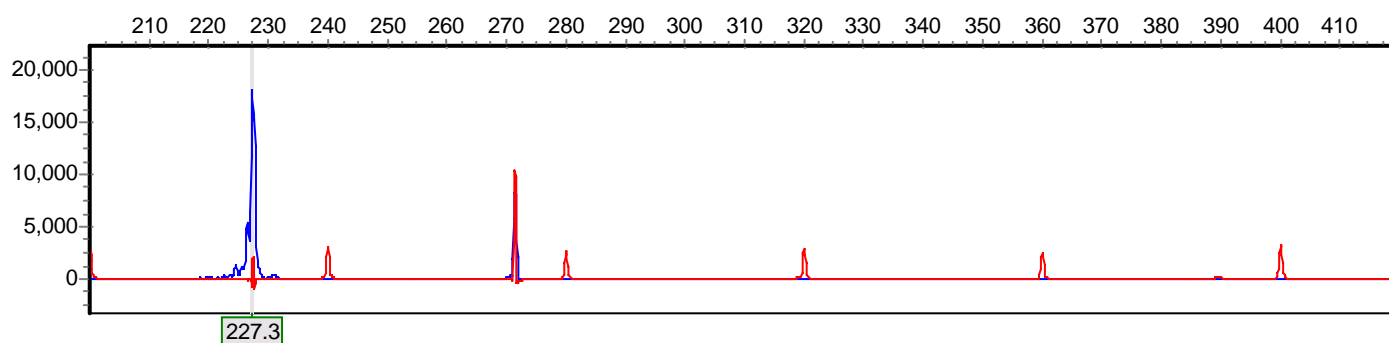

**Sample 1159\_C08.fsa** Run date and time: 01/05/2017 - 10:23:59 -> 01/05/2017 - 11:07:48

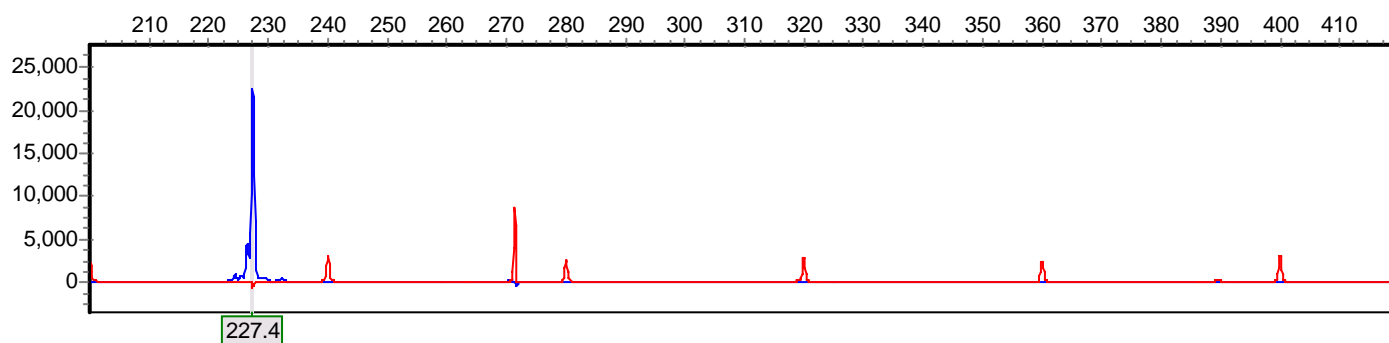

**Sample 1260\_D08.fsa** Run date and time: 01/05/2017 - 10:23:59 -> 01/05/2017 - 11:07:48

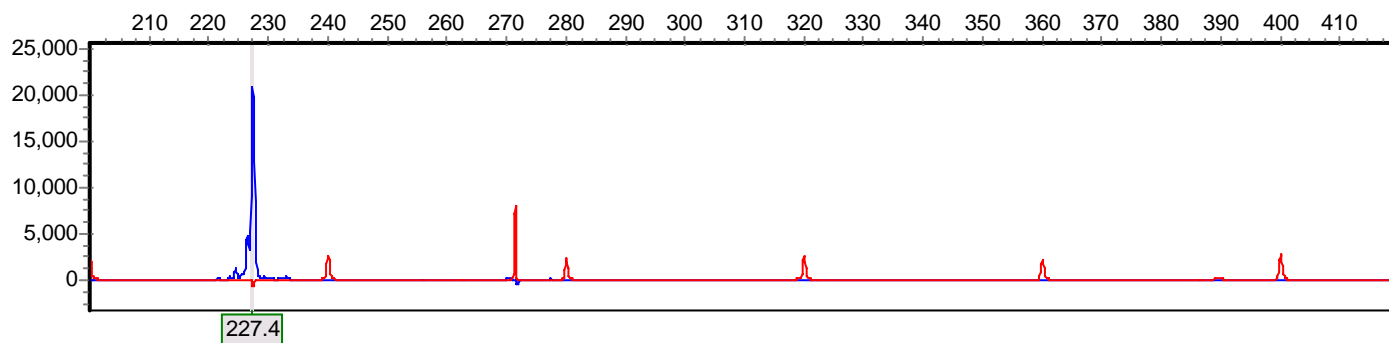

**Sample 13:** 61\_E08.fsa Run date and time: 01/05/2017 - 10:23:59 -> 01/05/2017 - 11:07:48

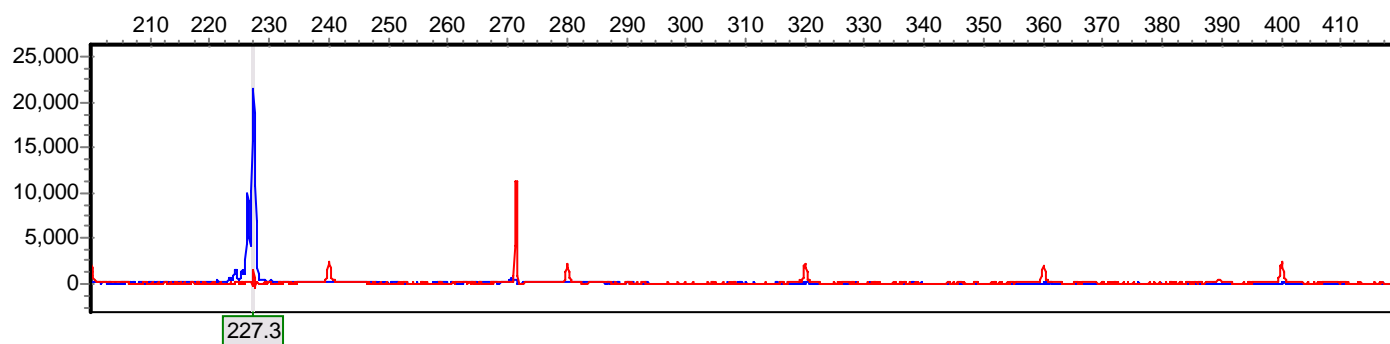

**Sample 14:** 62\_F08.fsa Run date and time: 01/05/2017 - 10:23:59 -> 01/05/2017 - 11:07:48

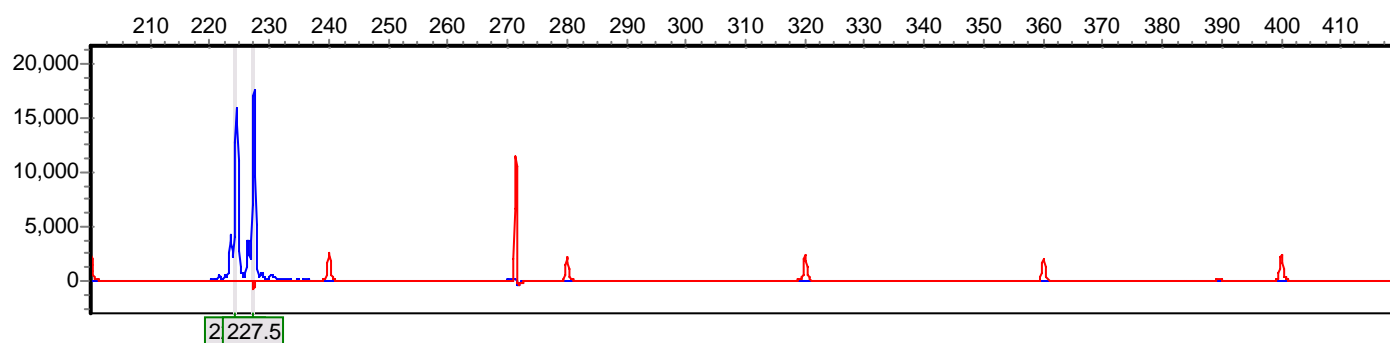

**Sample 15:** 63\_G08.fsa Run date and time: 01/05/2017 - 10:23:59 -> 01/05/2017 - 11:07:48

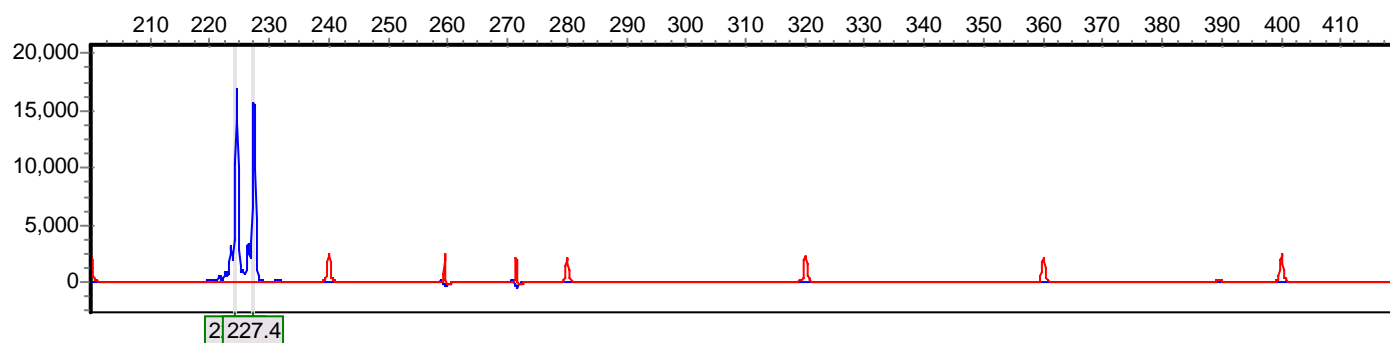

**Sample 16:** 64\_H08.fsa Run date and time: 01/05/2017 - 10:23:59 -> 01/05/2017 - 11:07:48

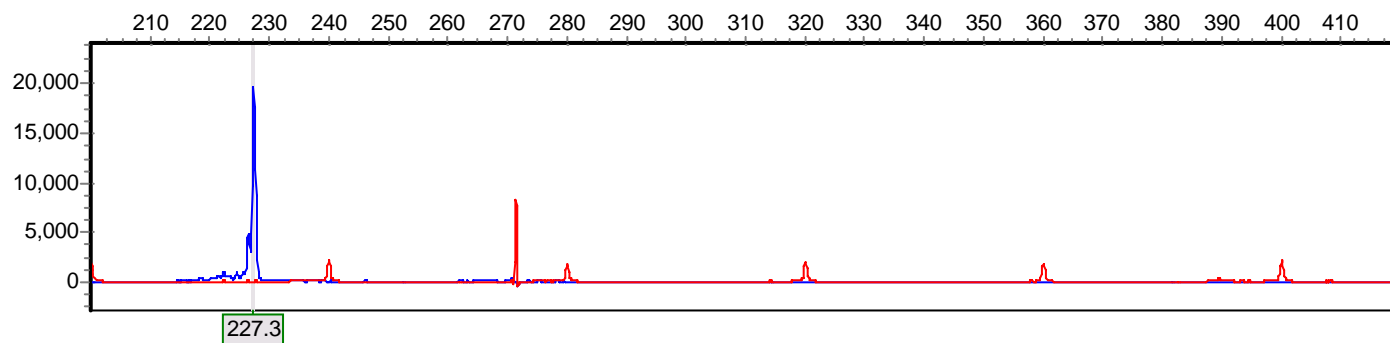

Sample 17: 65\_A09.fsa    Run date and time: 01/05/2017 - 10:23:59 -> 01/05/2017 - 11:07:48

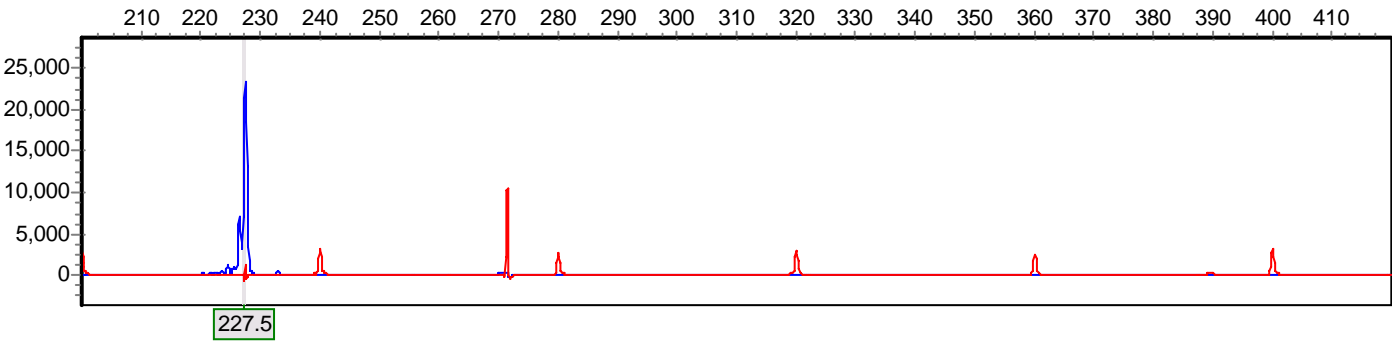

Sample 1866\_B09.fsa    Run date and time: 01/05/2017 - 10:23:59 -> 01/05/2017 - 11:07:48

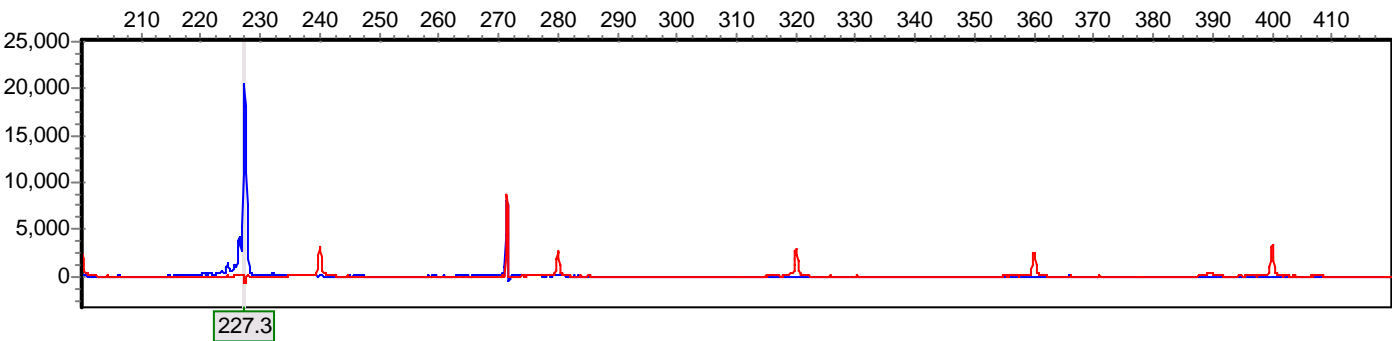

Sample 1967\_C09.fsa    Run date and time: 01/05/2017 - 10:23:59 -> 01/05/2017 - 11:07:48

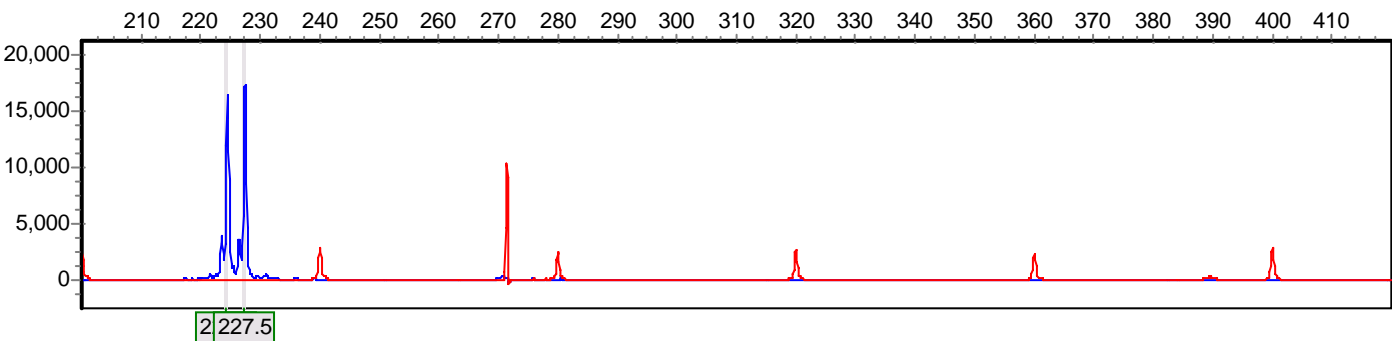

Sample 2068\_D09.fsa    Run date and time: 01/05/2017 - 10:23:59 -> 01/05/2017 - 11:07:48

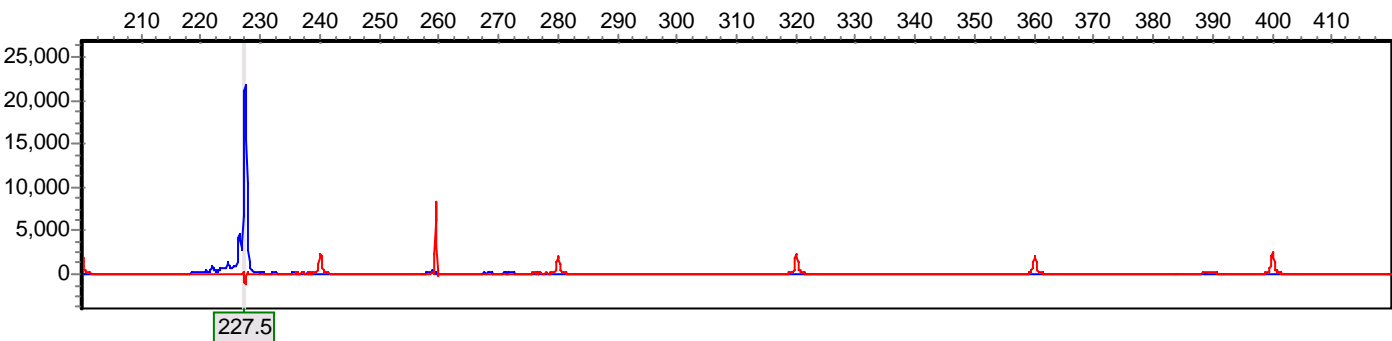

**Sample 21:** 69\_E09.fsa Run date and time: 01/05/2017 - 10:23:59 -> 01/05/2017 - 11:07:48

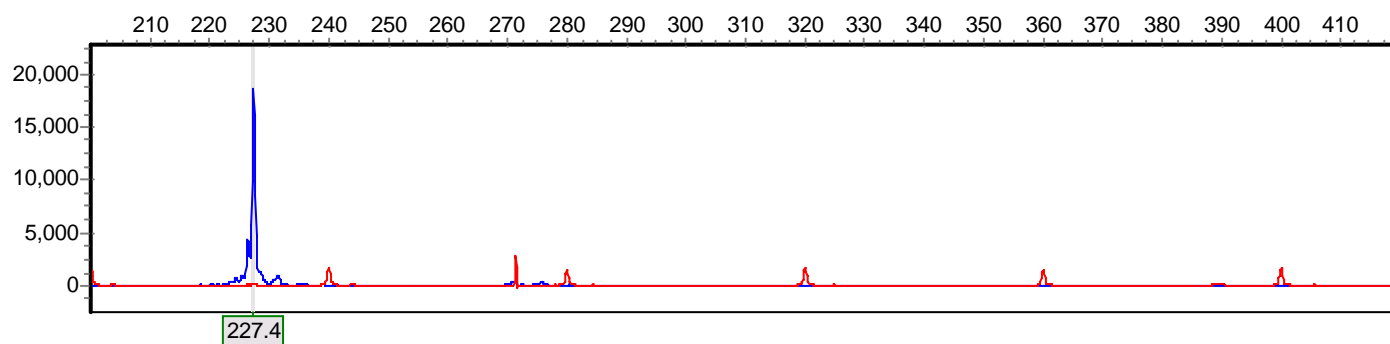

**Sample 2270\_F09.fsa** Run date and time: 01/05/2017 - 10:23:59 -> 01/05/2017 - 11:07:48

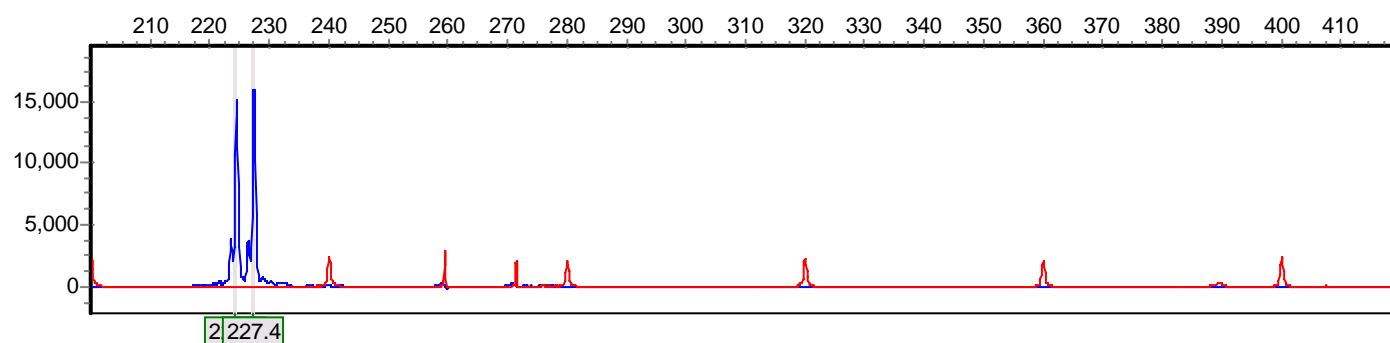

**Sample 2371\_G09.fsa** Run date and time: 01/05/2017 - 10:23:59 -> 01/05/2017 - 11:07:48

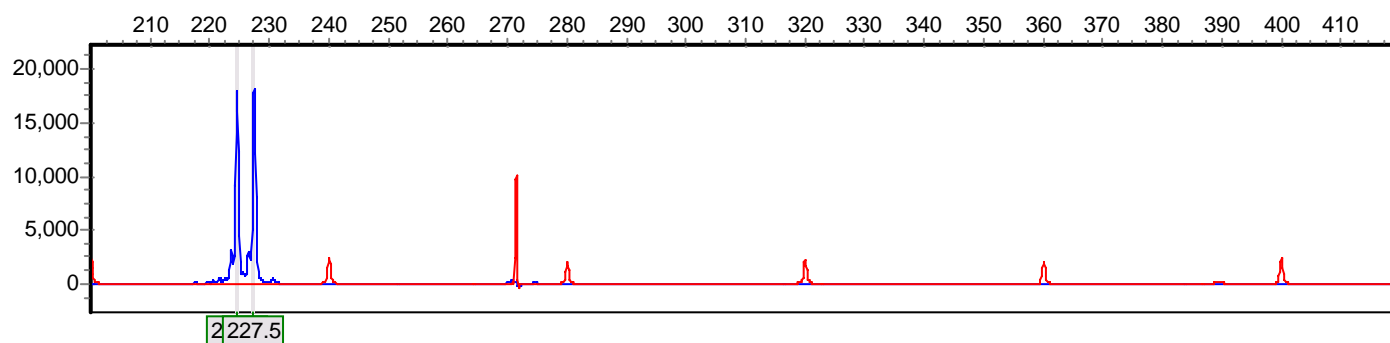

**Sample 2472\_H09.fsa** Run date and time: 01/05/2017 - 10:23:59 -> 01/05/2017 - 11:07:48

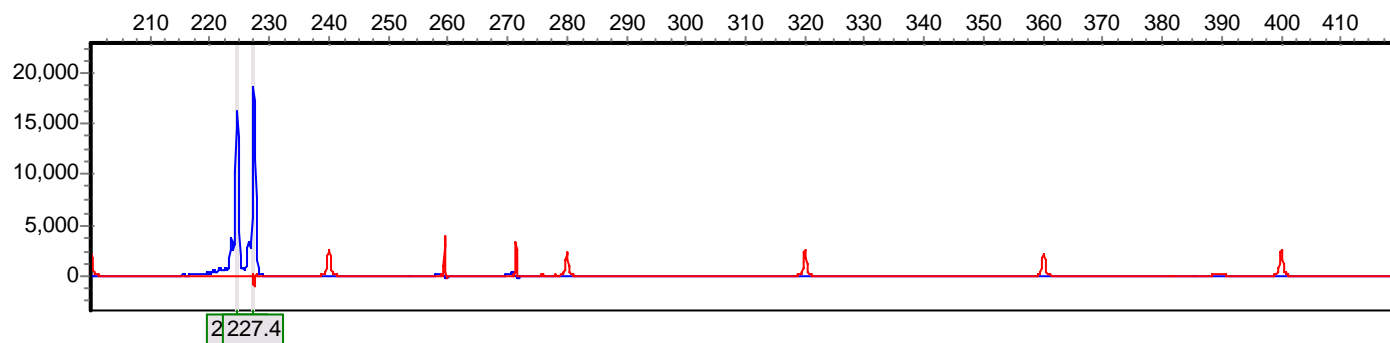

Sample 25: 73\_A10.fsa    Run date and time: 01/05/2017 - 10:23:59 -> 01/05/2017 - 11:07:48

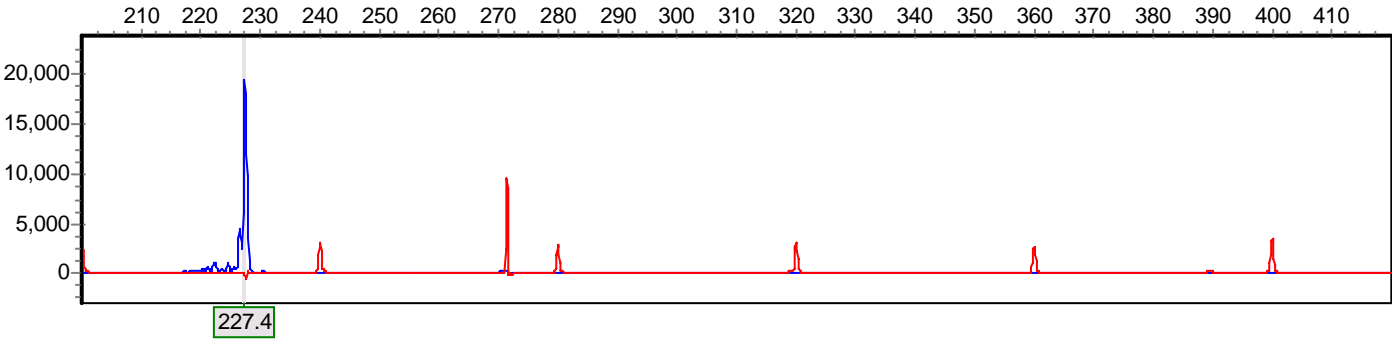

Sample 2674\_B10.fsa    Run date and time: 01/05/2017 - 10:23:59 -> 01/05/2017 - 11:07:48

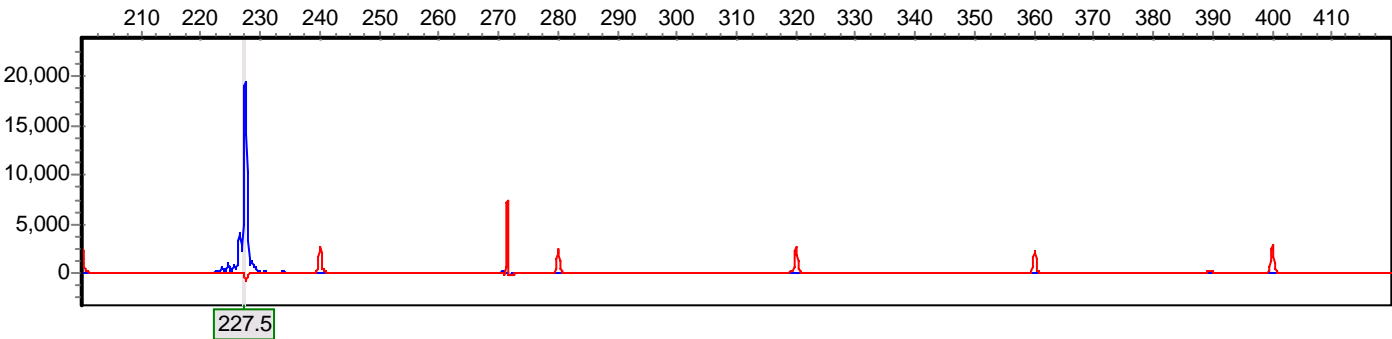

Sample 2775\_C10.fsa    Run date and time: 01/05/2017 - 10:23:59 -> 01/05/2017 - 11:07:48

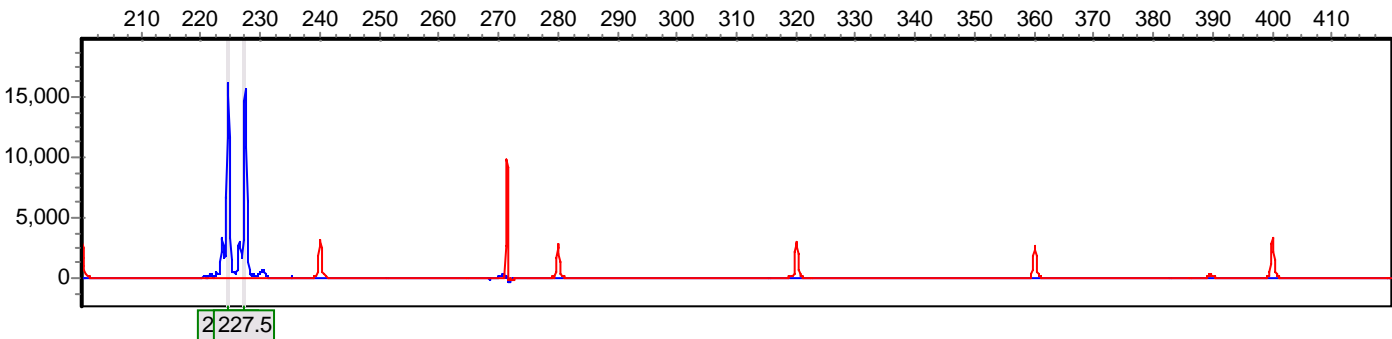

Sample 2876\_D10.fsa    Run date and time: 01/05/2017 - 10:23:59 -> 01/05/2017 - 11:07:48

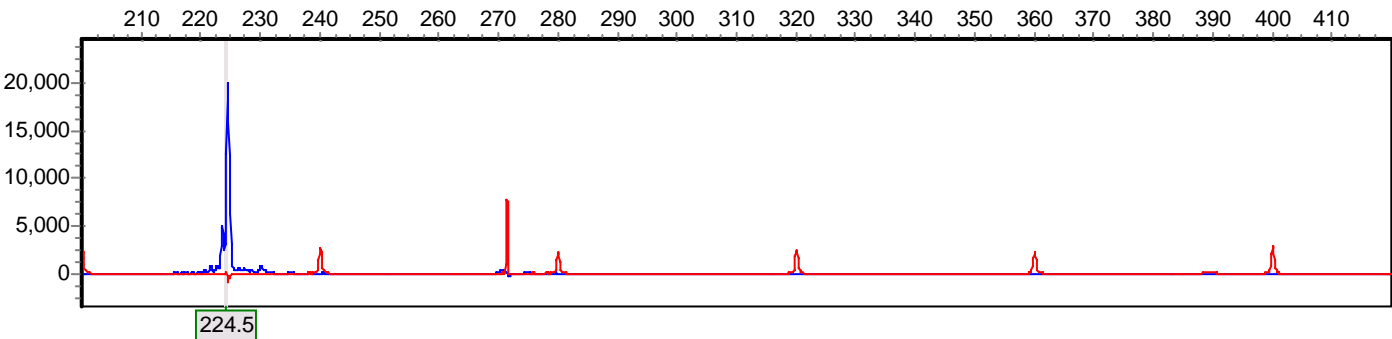

Sample 29: 77\_E10.fsa    Run date and time: 01/05/2017 - 10:23:59 -> 01/05/2017 - 11:07:48

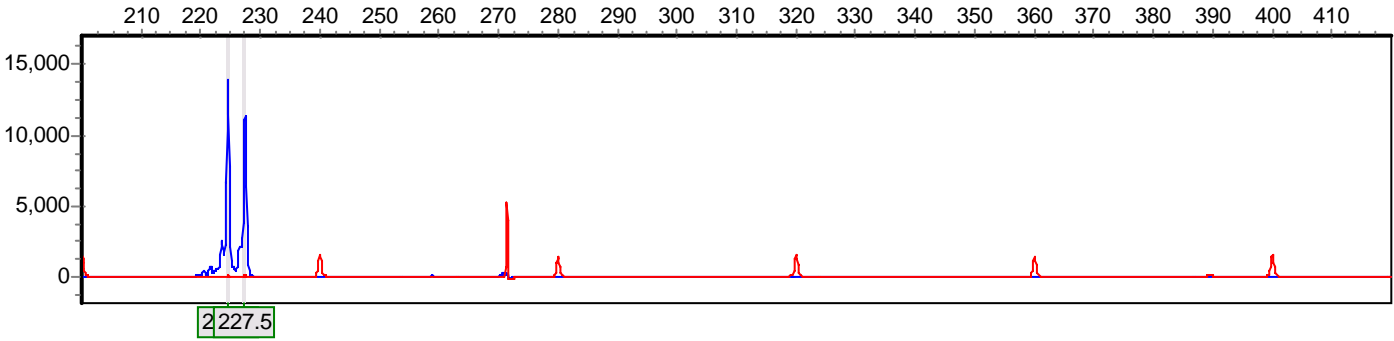

Sample 30: 78\_F10.fsa    Run date and time: 01/05/2017 - 10:23:59 -> 01/05/2017 - 11:07:48

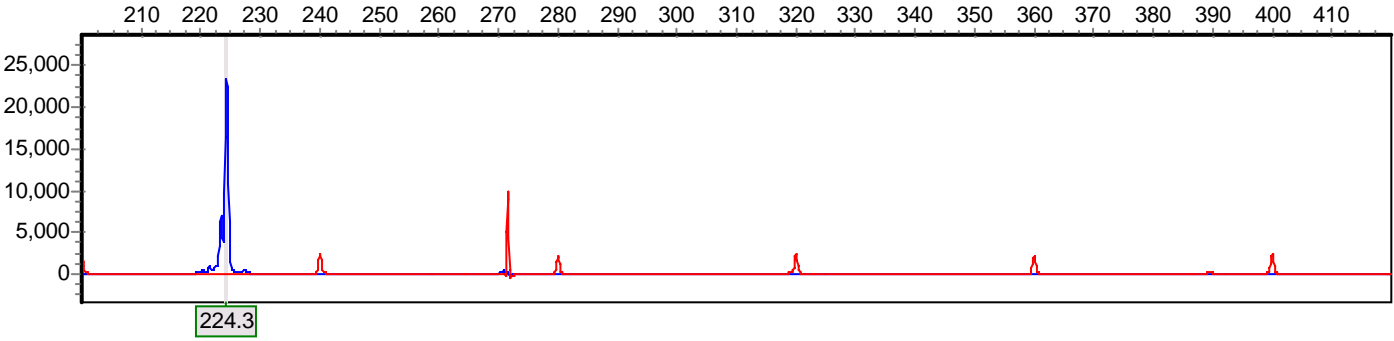

Sample 31: 79\_G10.fsa    Run date and time: 01/05/2017 - 10:23:59 -> 01/05/2017 - 11:07:48

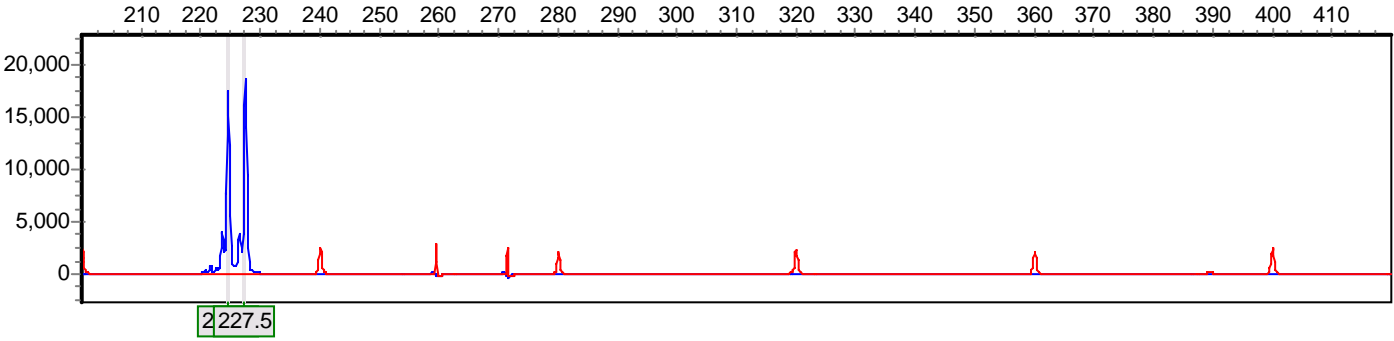

Sample 32: 80\_H10.fsa    Run date and time: 01/05/2017 - 10:23:59 -> 01/05/2017 - 11:07:48

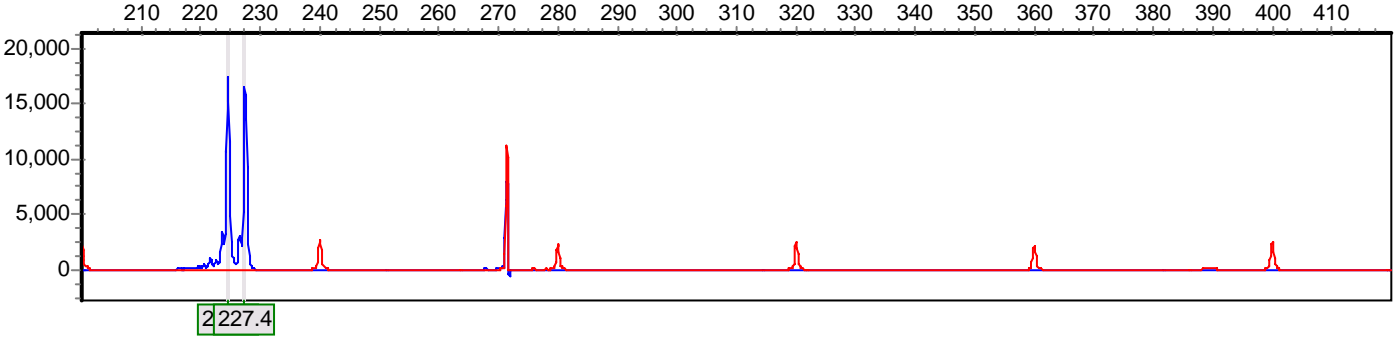



Sample 33: 81\_A11.fsa    Run date and time: 01/05/2017 - 10:23:59 -> 01/05/2017 - 11:07:48

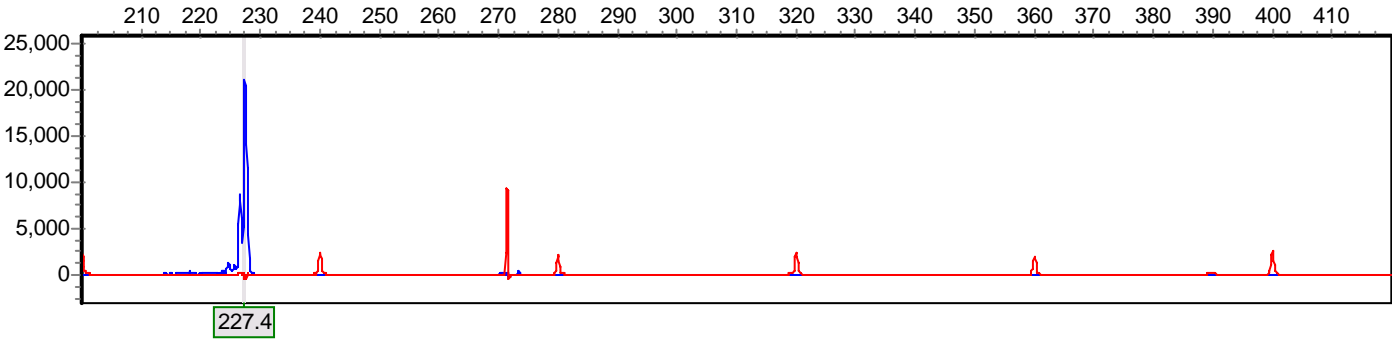

Sample 3482\_B11.fsa    Run date and time: 01/05/2017 - 10:23:59 -> 01/05/2017 - 11:07:48

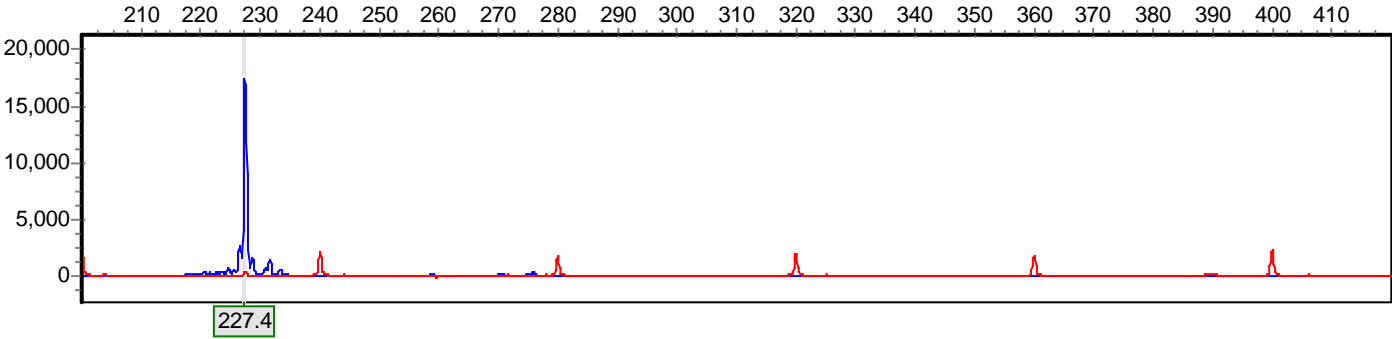

Sample 3583\_C11.fsa    Run date and time: 01/05/2017 - 10:23:59 -> 01/05/2017 - 11:07:48

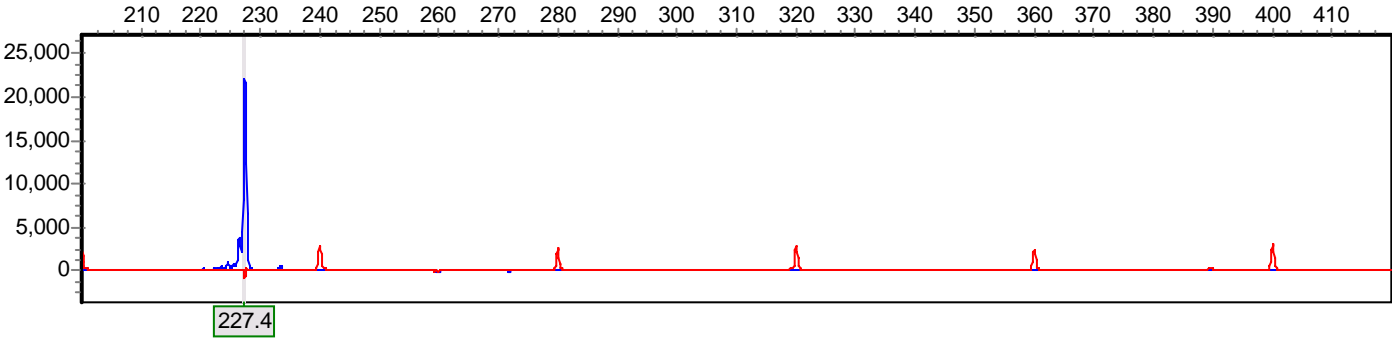

Sample 3684\_D11.fsa    Run date and time: 01/05/2017 - 10:23:59 -> 01/05/2017 - 11:07:48

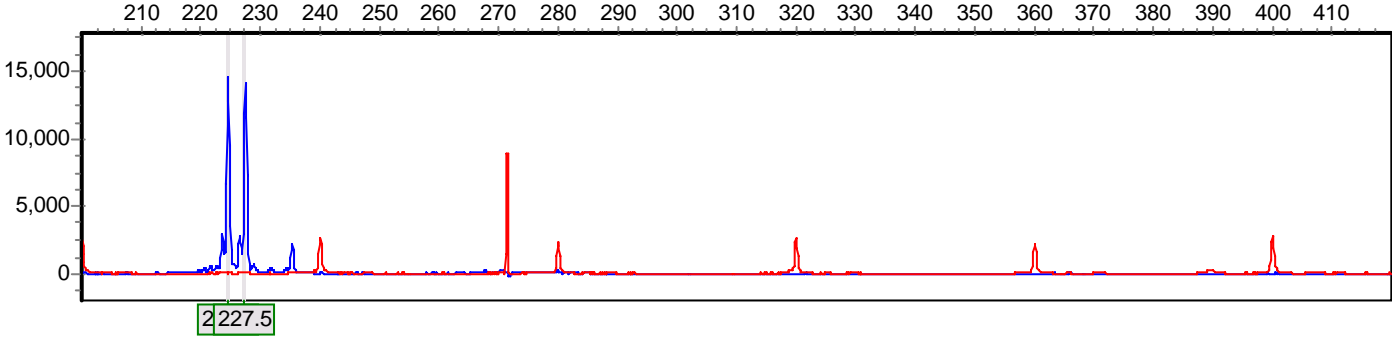

Sample 37: 85\_E11.fsa    Run date and time: 01/05/2017 - 10:23:59 -> 01/05/2017 - 11:07:48

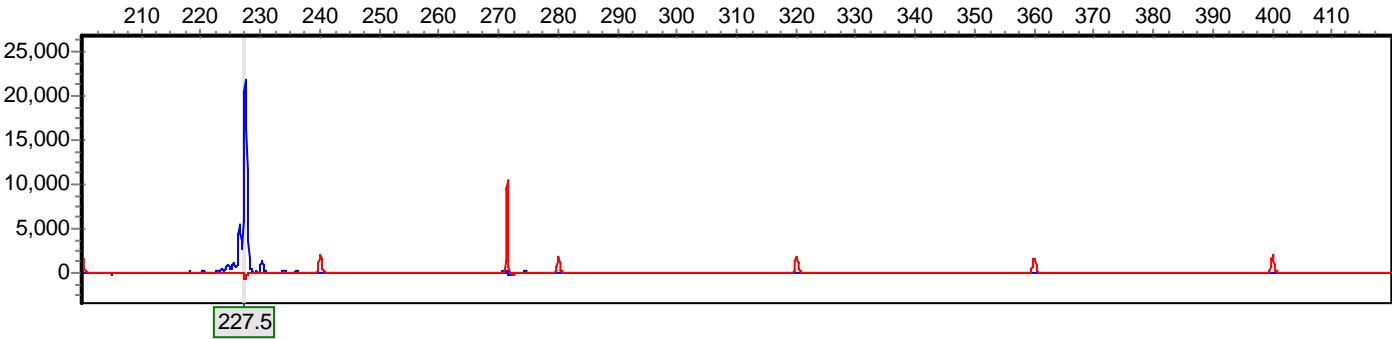

Sample 38: 86\_F11.fsa    Run date and time: 01/05/2017 - 10:23:59 -> 01/05/2017 - 11:07:48

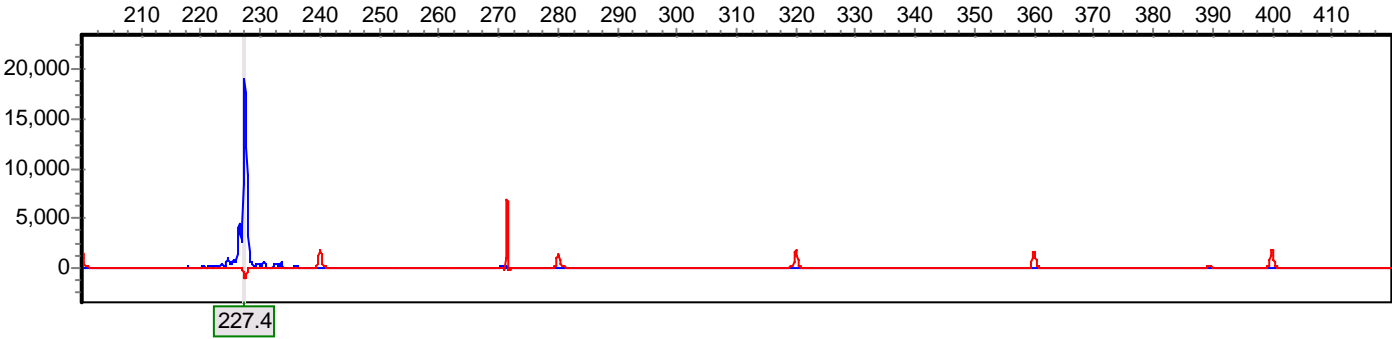

Sample 39: 87\_G11.fsa    Run date and time: 01/05/2017 - 10:23:59 -> 01/05/2017 - 11:07:48

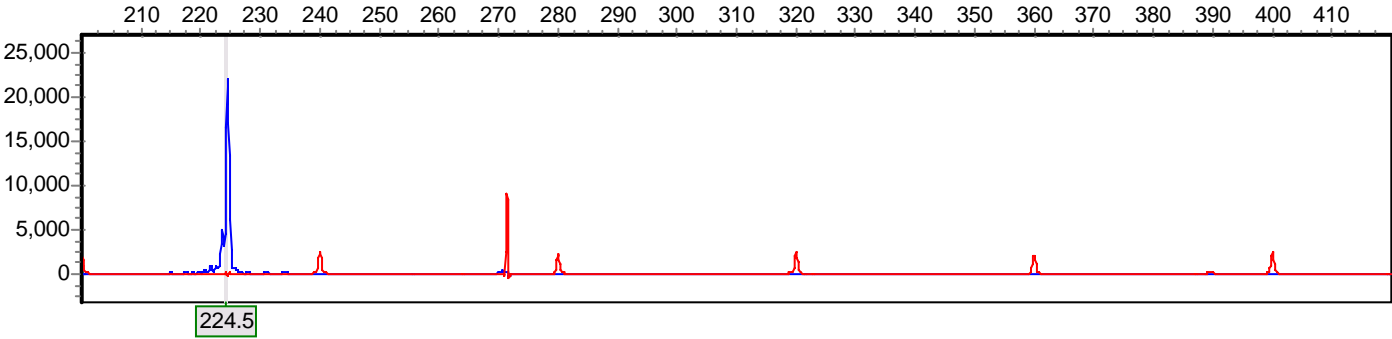

Sample 40: 88\_H11.fsa    Run date and time: 01/05/2017 - 10:23:59 -> 01/05/2017 - 11:07:48

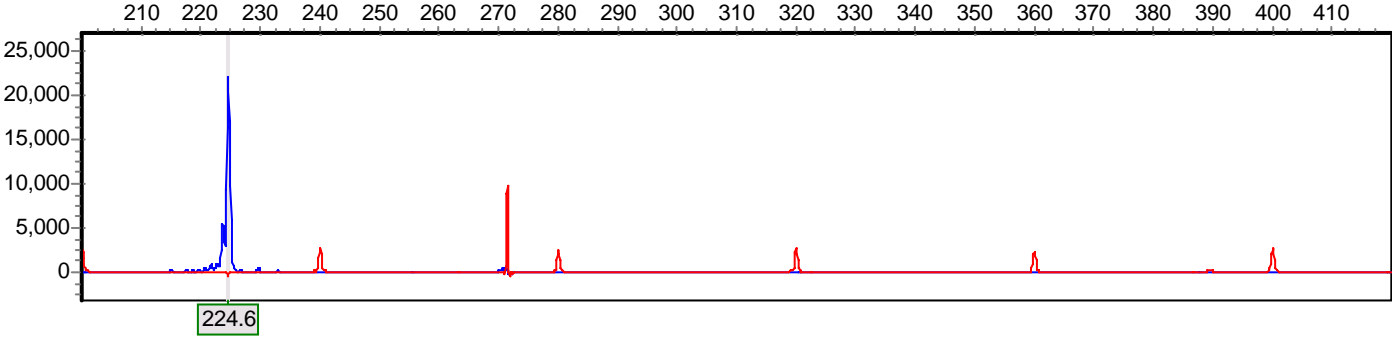

**Sample 41:** 89\_A12.fsa Run date and time: 01/05/2017 - 10:23:59 -> 01/05/2017 - 11:07:48

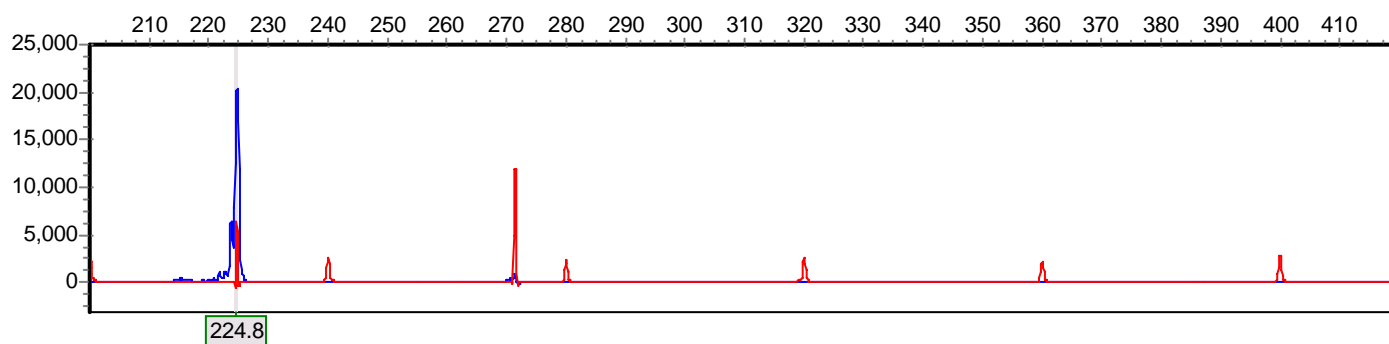

**Sample 42**90\_B12.fsa Run date and time: 01/05/2017 - 10:23:59 -> 01/05/2017 - 11:07:48

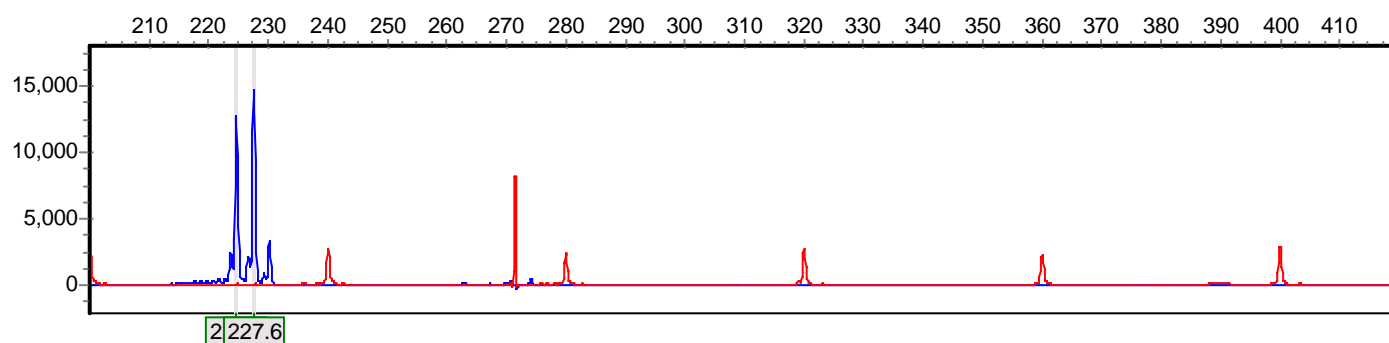

**Sample 43**91\_C12.fsa Run date and time: 01/05/2017 - 10:23:59 -> 01/05/2017 - 11:07:48

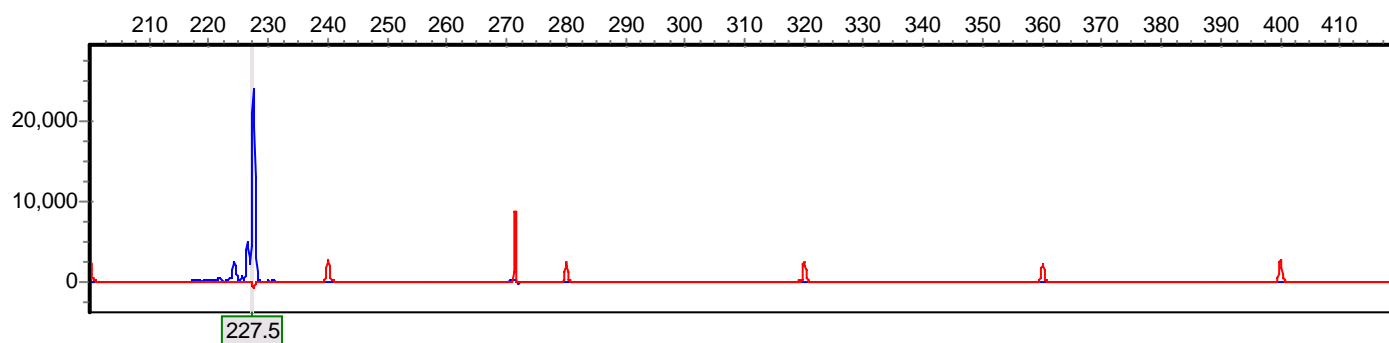

**Sample 44**92\_D12.fsa Run date and time: 01/05/2017 - 10:23:59 -> 01/05/2017 - 11:07:48

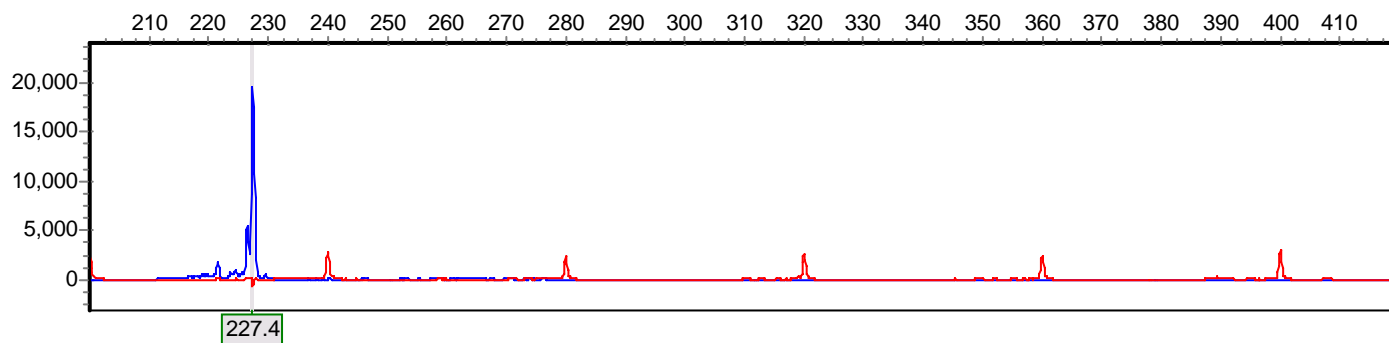

**Sample 45:** 93\_E12.fsa Run date and time: 01/05/2017 - 10:23:59 -> 01/05/2017 - 11:07:48

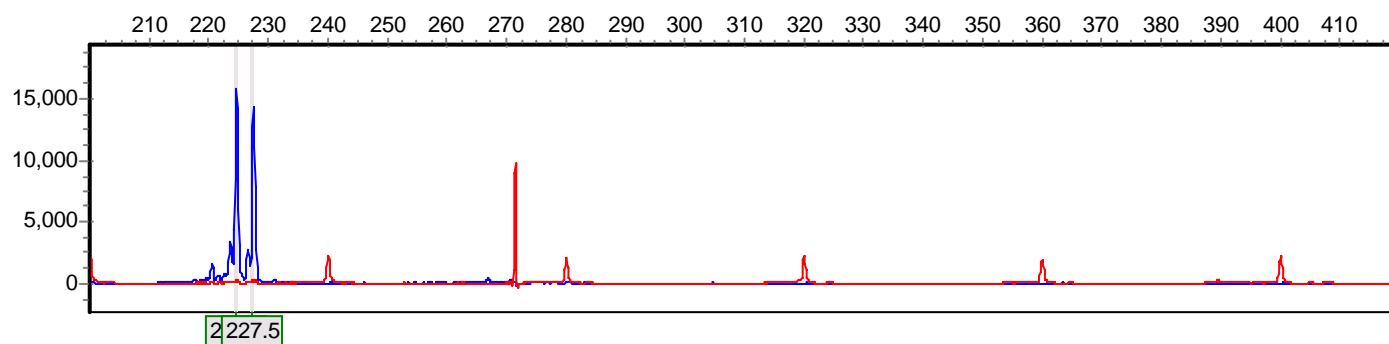

**Sample 46:** 94\_F12.fsa Run date and time: 01/05/2017 - 10:23:59 -> 01/05/2017 - 11:07:48

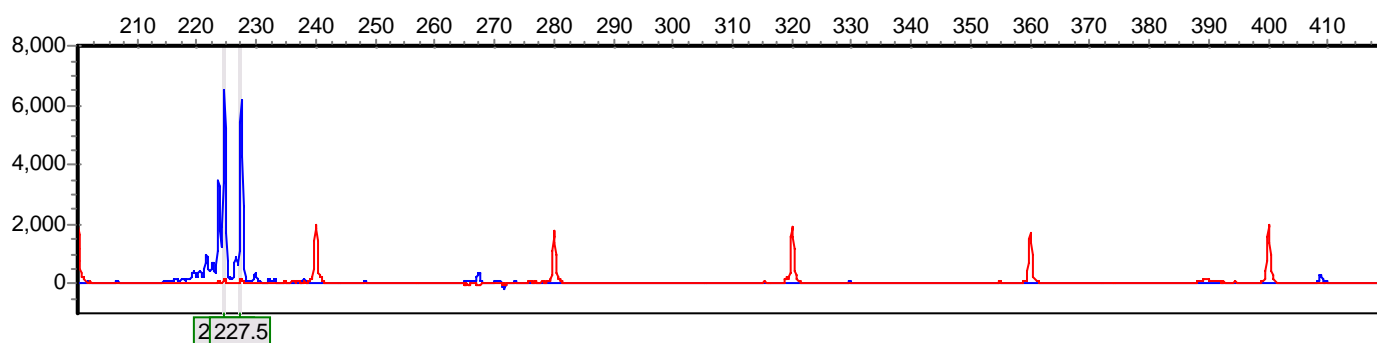

**Sample 47:** H100.fsa Run date and time: 12/31/2016 - 10:54:02 -> 12/31/2016 - 11:37:41

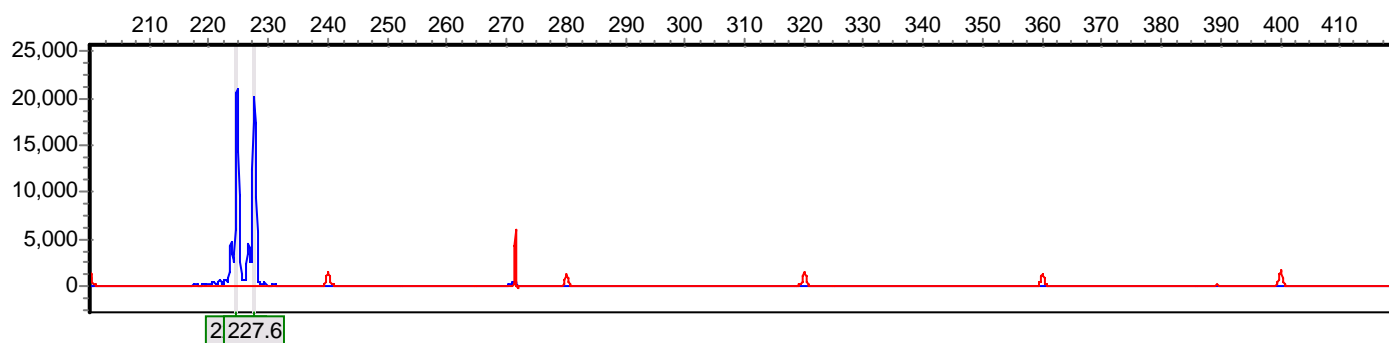

**Sample 48:** H102.fsa Run date and time: 12/31/2016 - 10:54:02 -> 12/31/2016 - 11:37:41

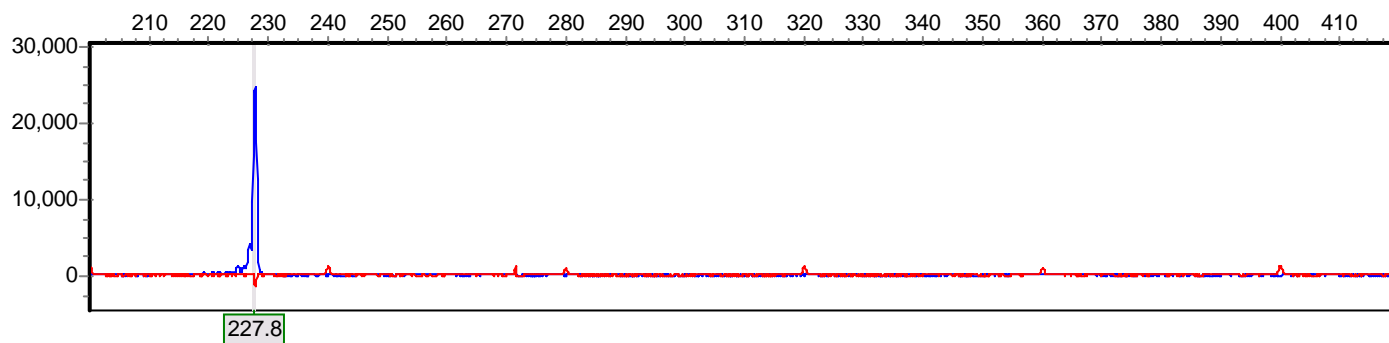

**Sample 49:** H106.fsa Run date and time: 12/31/2016 - 10:54:02 -> 12/31/2016 - 11:37:41

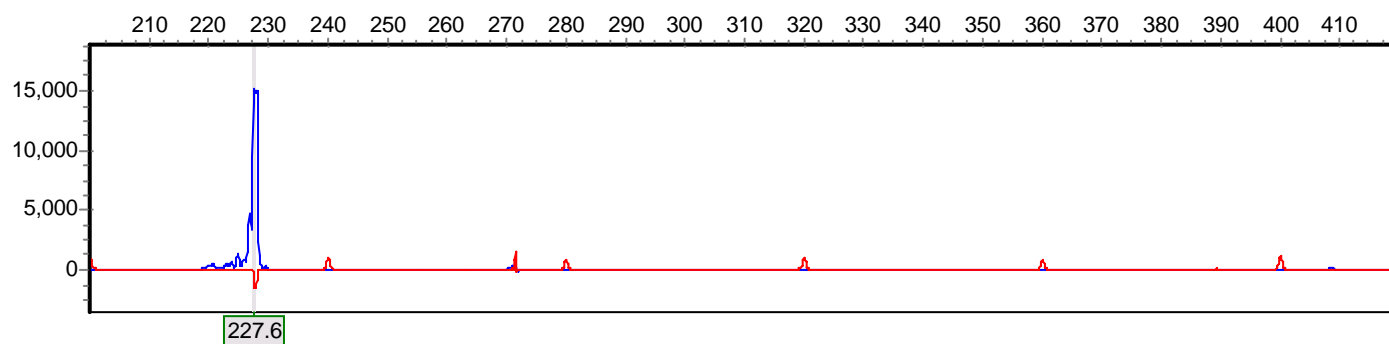

**Sample 50**H107.fsa Run date and time: 12/31/2016 - 10:54:02 -> 12/31/2016 - 11:37:41

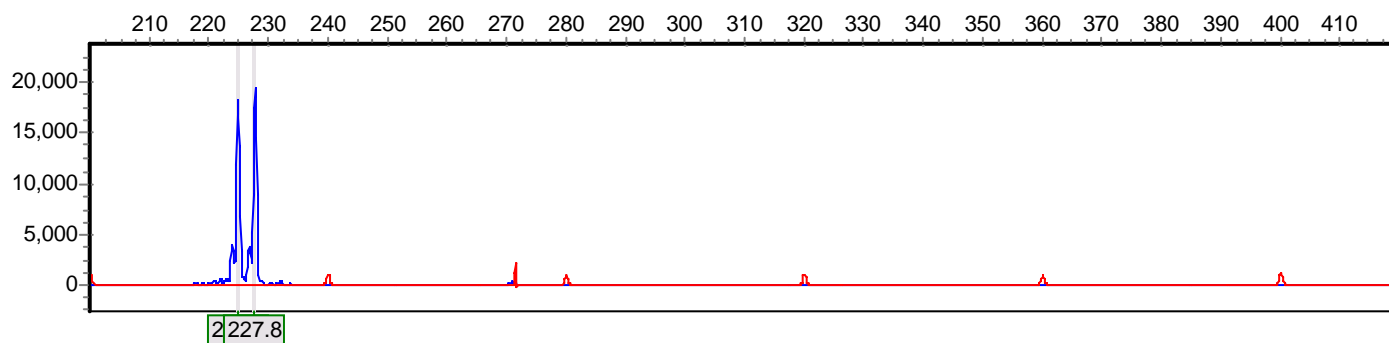

**Sample 51**H108.fsa Run date and time: 12/31/2016 - 10:54:02 -> 12/31/2016 - 11:37:41

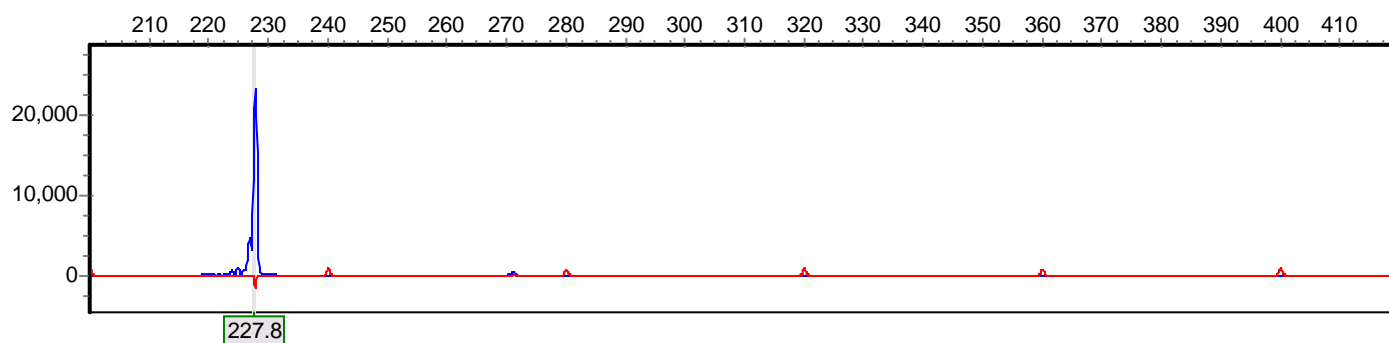

**Sample 52**H110.fsa Run date and time: 12/31/2016 - 10:54:02 -> 12/31/2016 - 11:37:41

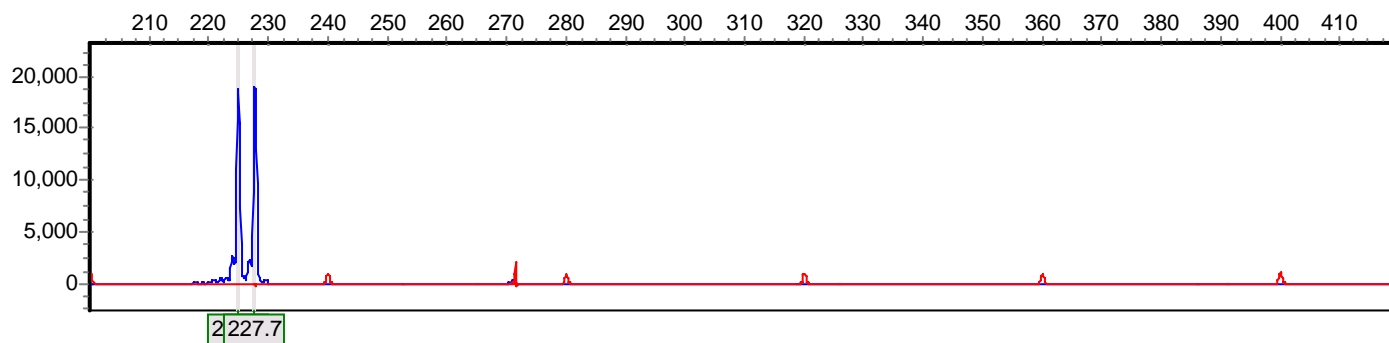

Sample 53: H111.fsa    Run date and time: 12/31/2016 - 10:54:02 -> 12/31/2016 - 11:37:41

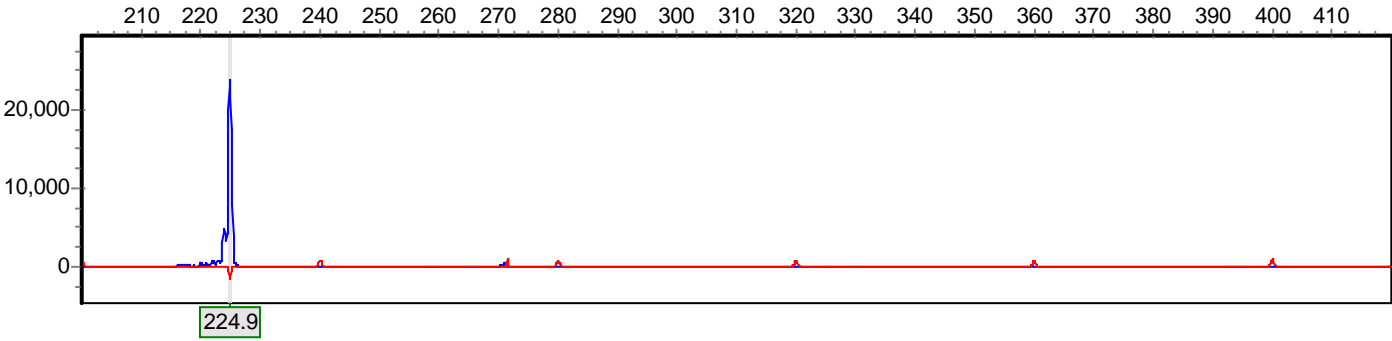

Supplement: s1 [file s1]
