# Supplementary material
Source: MDPI journal article supplement (https://www.mdpi.com/1999-4907/10/3/225)

**Sample 1:** 01\_A01.fsa Run date and time: 01/05/2017 - 08:54:22 -> 01/05/2017 - 09:38:13

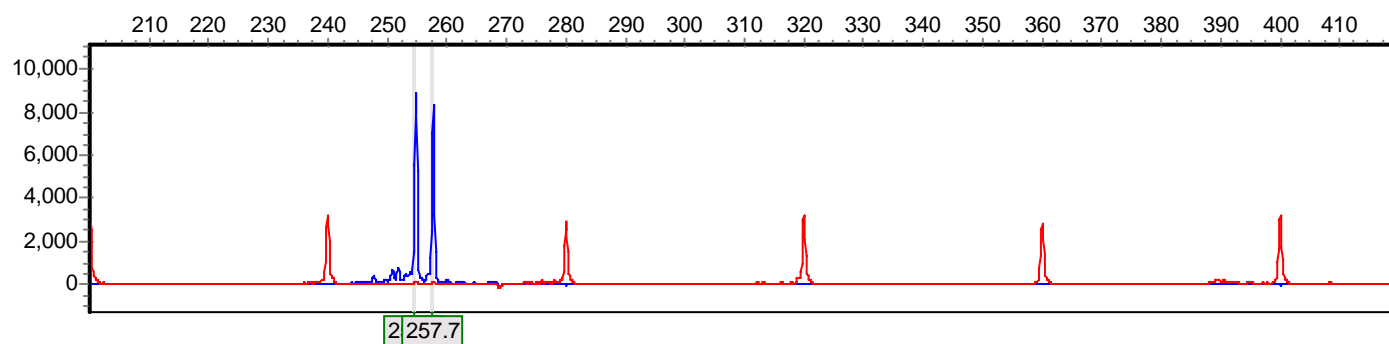

**Sample 2:** 02\_B01.fsa Run date and time: 01/05/2017 - 08:54:22 -> 01/05/2017 - 09:38:13

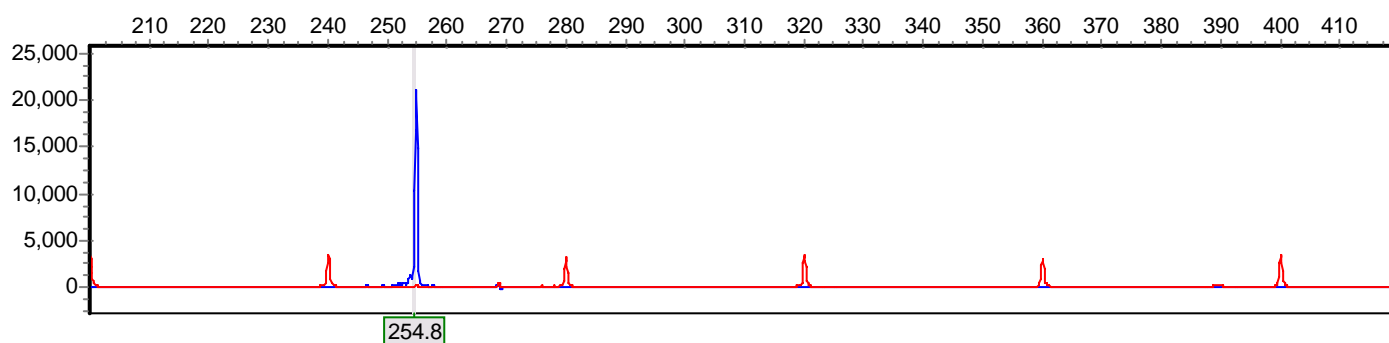

**Sample 3:** 03\_C01.fsa Run date and time: 01/05/2017 - 08:54:22 -> 01/05/2017 - 09:38:13

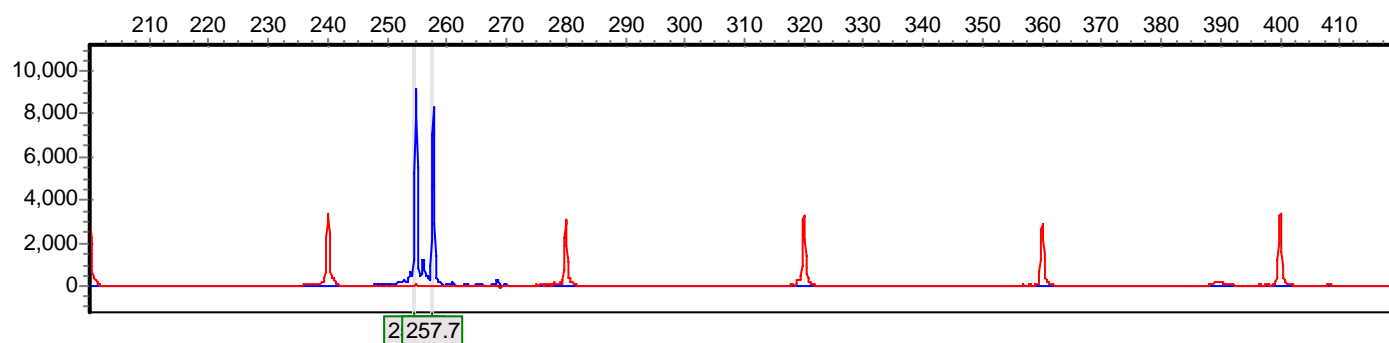

**Sample 4:** 04\_D01.fsa Run date and time: 01/05/2017 - 08:54:22 -> 01/05/2017 - 09:38:13

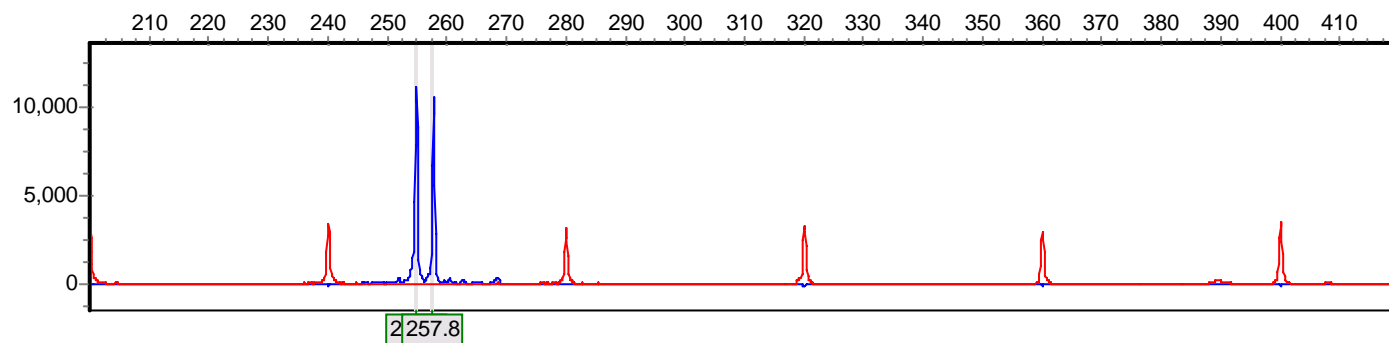

**Sample 5:** 05\_E01.fsa Run date and time: 01/05/2017 - 08:54:22 -> 01/05/2017 - 09:38:13

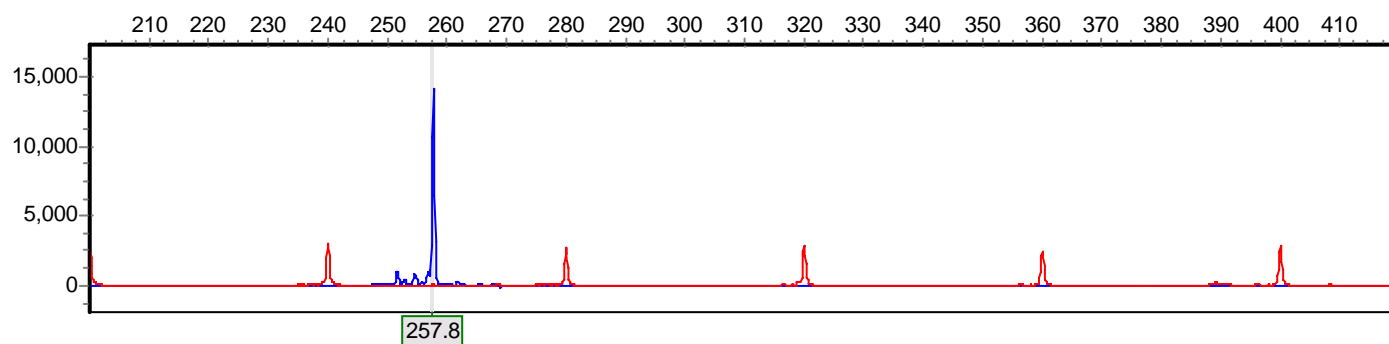

**Sample 6** 06\_F01.fsa Run date and time: 01/05/2017 - 08:54:22 -> 01/05/2017 - 09:38:13

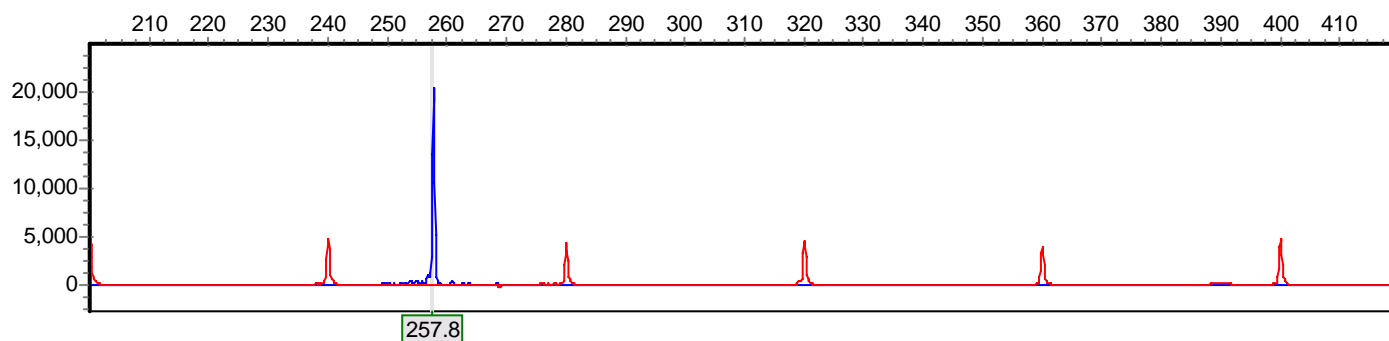

**Sample 7** 07\_G01.fsa Run date and time: 01/05/2017 - 08:54:22 -> 01/05/2017 - 09:38:13

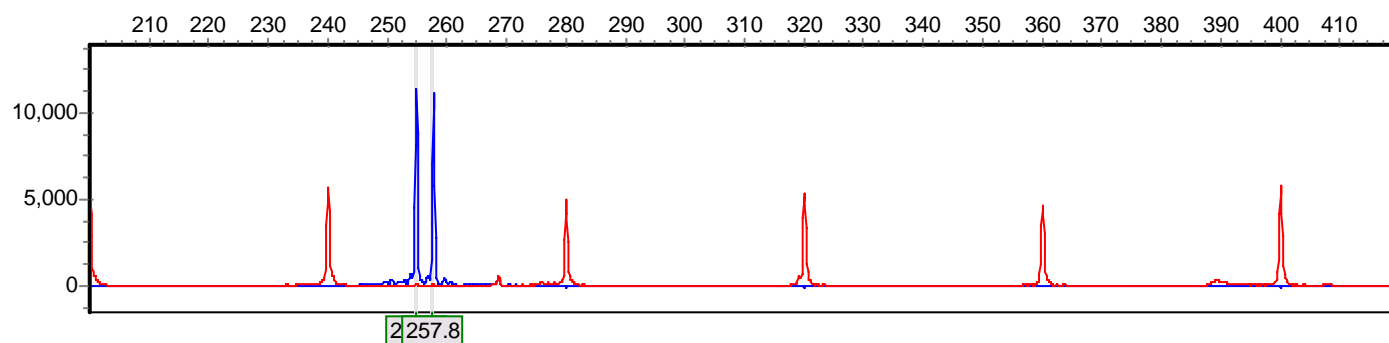

**Sample 8** 08\_H01.fsa Run date and time: 01/05/2017 - 08:54:22 -> 01/05/2017 - 09:38:13

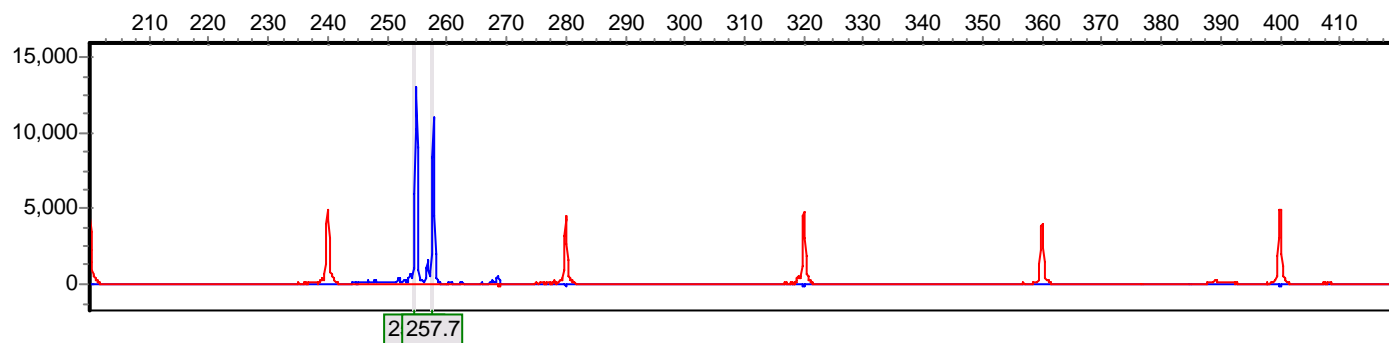

**Sample 9:** 09\_A02.fsa Run date and time: 01/05/2017 - 08:54:22 -> 01/05/2017 - 09:38:13

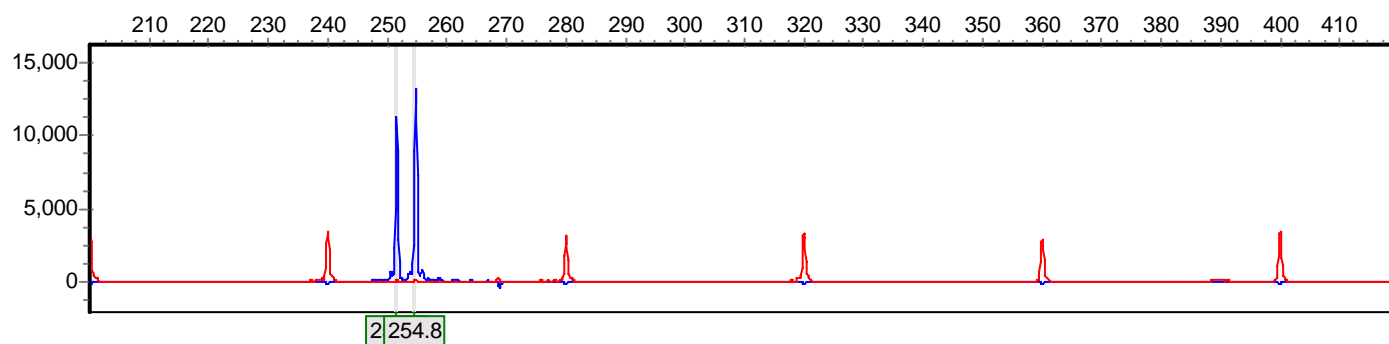

**Sample 10:** 10\_B02.fsa Run date and time: 01/05/2017 - 08:54:22 -> 01/05/2017 - 09:38:13

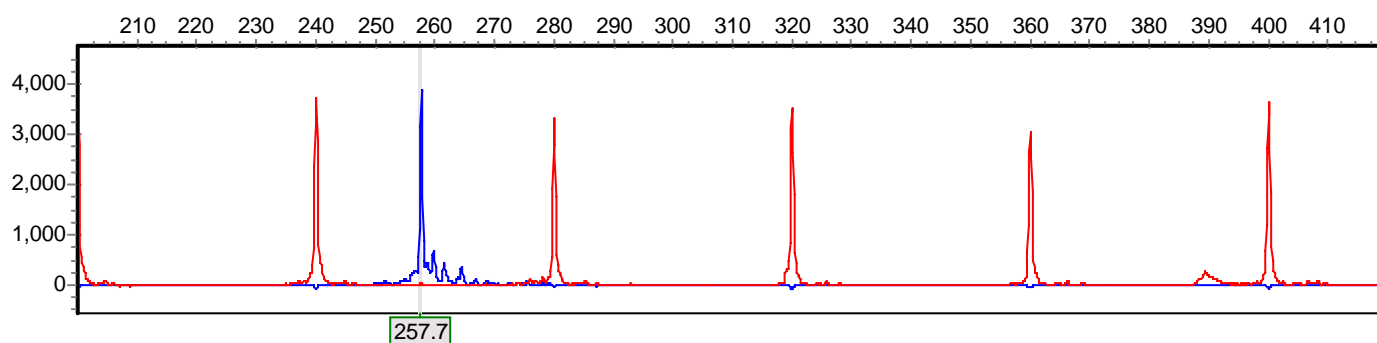

**Sample 11:** 11\_C02.fsa Run date and time: 01/05/2017 - 08:54:22 -> 01/05/2017 - 09:38:13

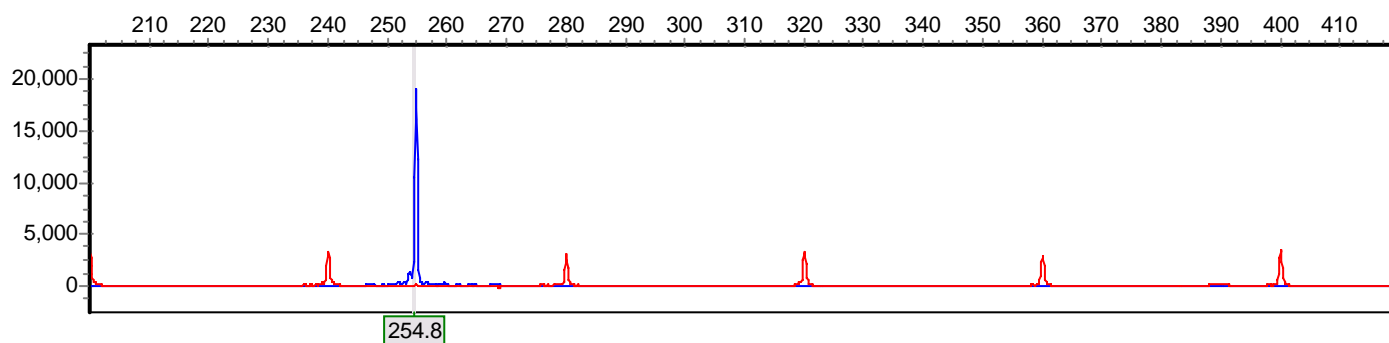

**Sample 12:** 12\_D02.fsa Run date and time: 01/05/2017 - 08:54:22 -> 01/05/2017 - 09:38:13

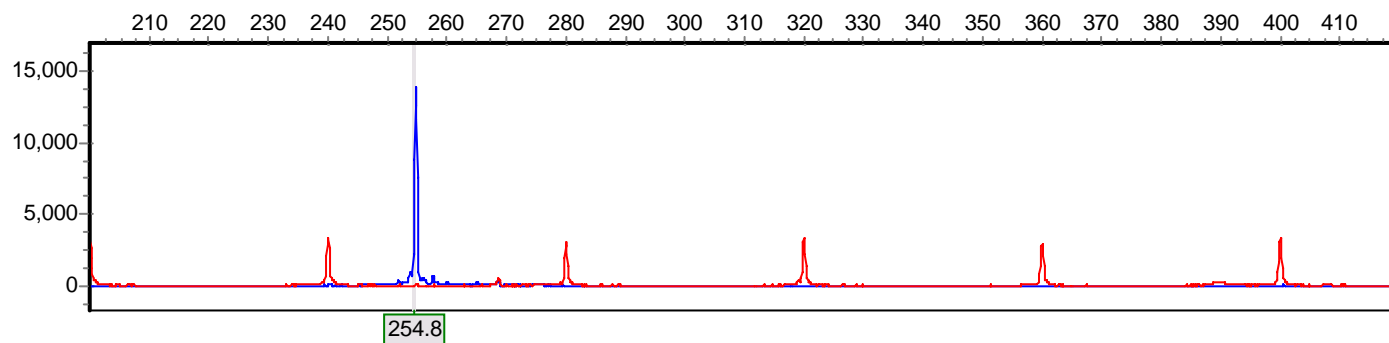

**Sample 13:** 13\_E02.fsa Run date and time: 01/05/2017 - 08:54:22 -> 01/05/2017 - 09:38:13

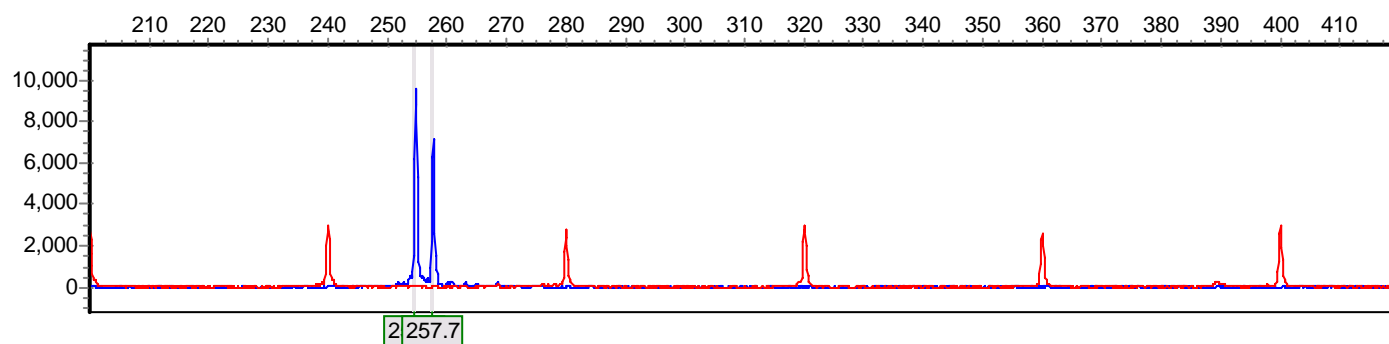

**Sample 14:** 14\_F02.fsa Run date and time: 01/05/2017 - 08:54:22 -> 01/05/2017 - 09:38:13

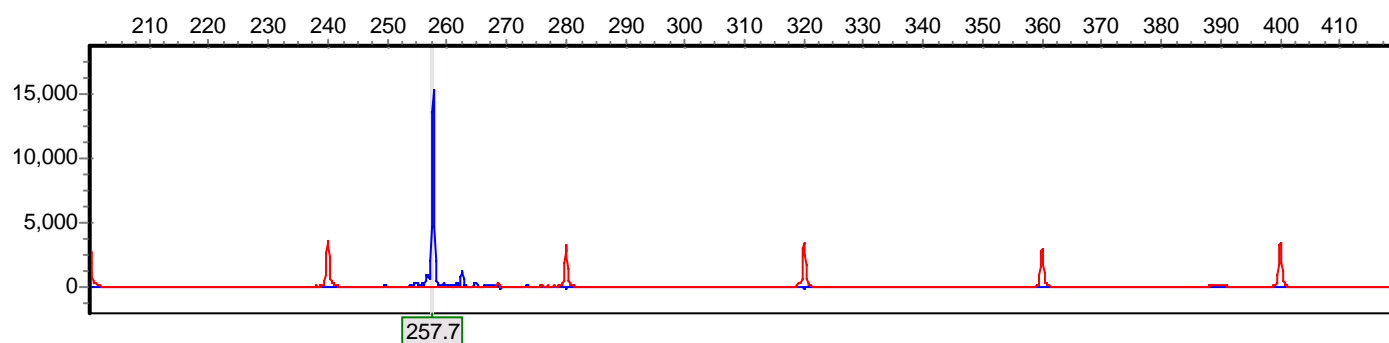

**Sample 15:** 15\_G02.fsa Run date and time: 01/05/2017 - 08:54:22 -> 01/05/2017 - 09:38:13

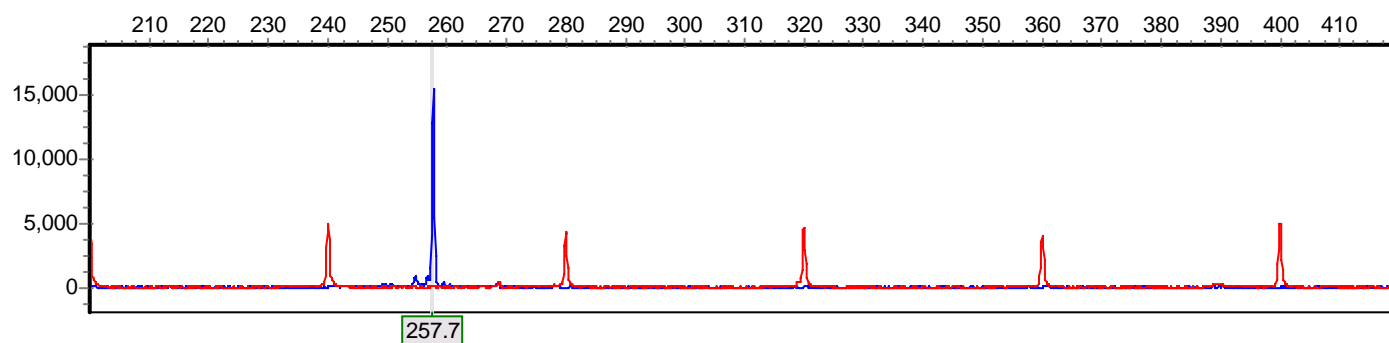

**Sample 16:** 16\_H02.fsa Run date and time: 01/05/2017 - 08:54:22 -> 01/05/2017 - 09:38:13

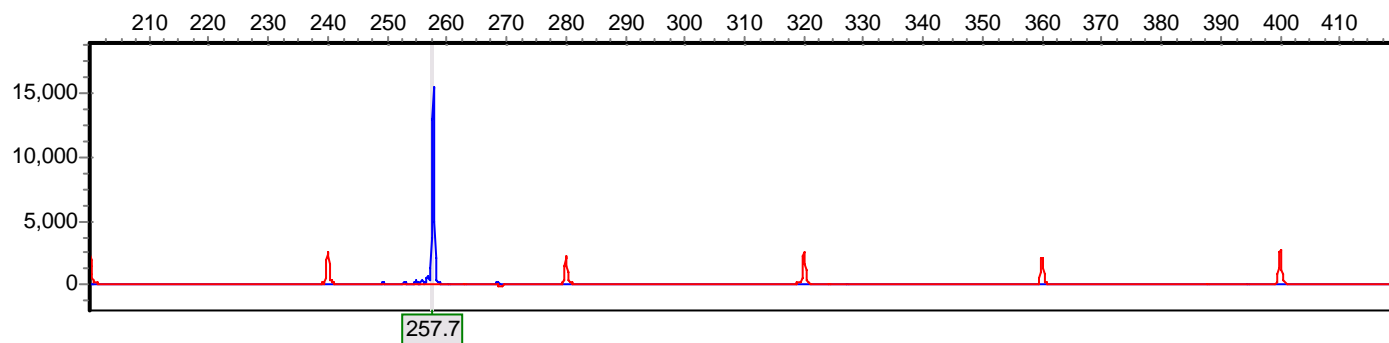

**Sample 17:** 17\_A03.fsa Run date and time: 01/05/2017 - 08:54:22 -> 01/05/2017 - 09:38:13

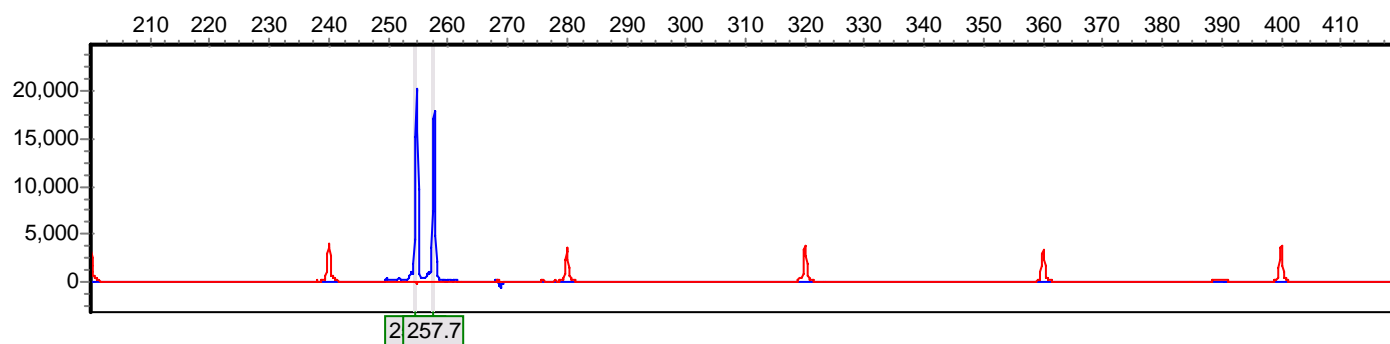

**Sample 18:** 18\_B03.fsa Run date and time: 01/05/2017 - 08:54:22 -> 01/05/2017 - 09:38:13

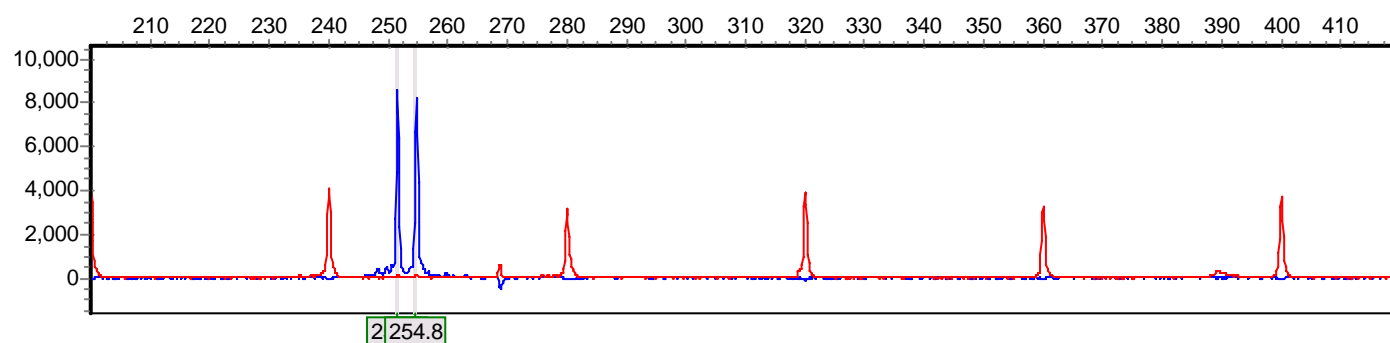

**Sample 19:** 19\_C03.fsa Run date and time: 01/05/2017 - 08:54:22 -> 01/05/2017 - 09:38:13

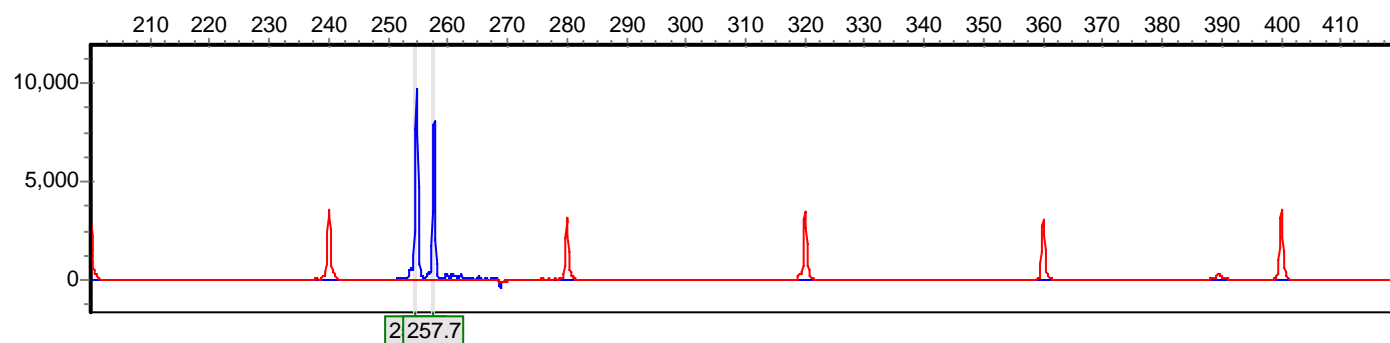

**Sample 20:** 20\_D03.fsa Run date and time: 01/05/2017 - 08:54:22 -> 01/05/2017 - 09:38:13

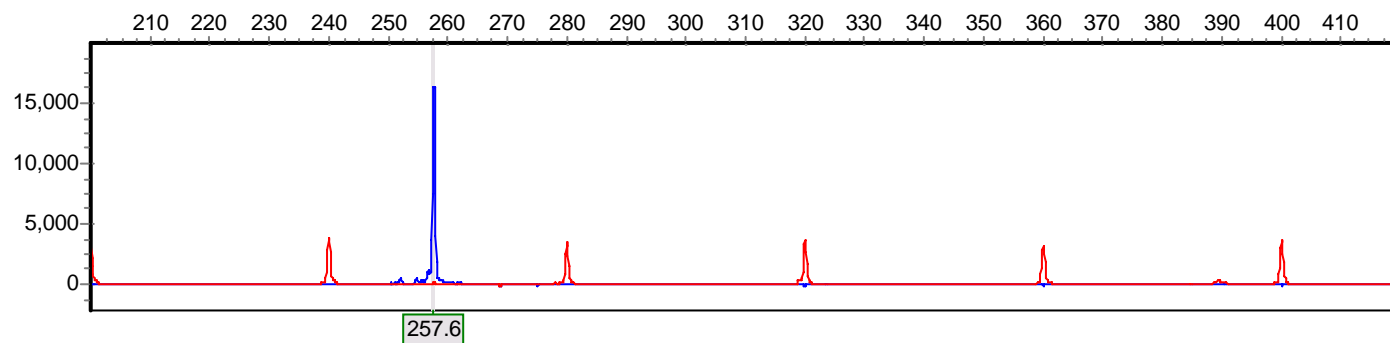

**Sample 21:** 21\_E03.fsa Run date and time: 01/05/2017 - 08:54:22 -> 01/05/2017 - 09:38:13

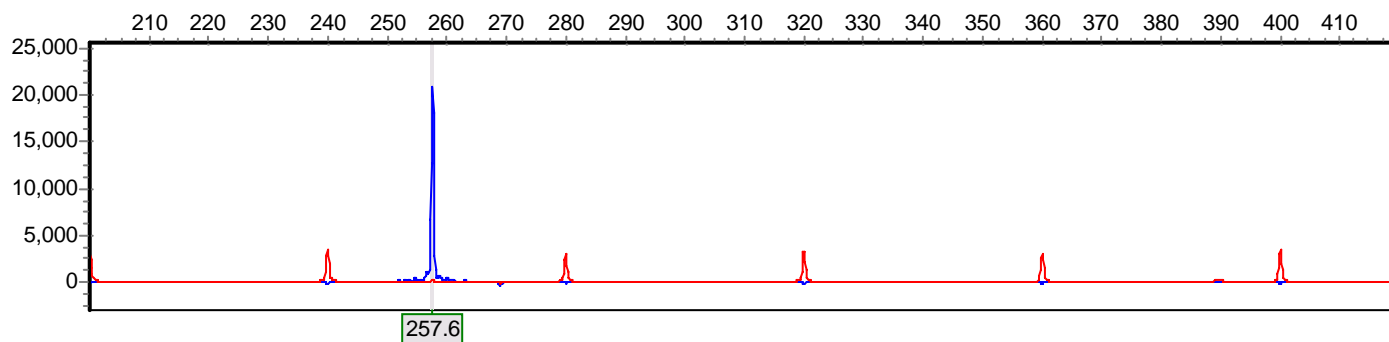

**Sample 22** 22\_F03.fsa Run date and time: 01/05/2017 - 08:54:22 -> 01/05/2017 - 09:38:13

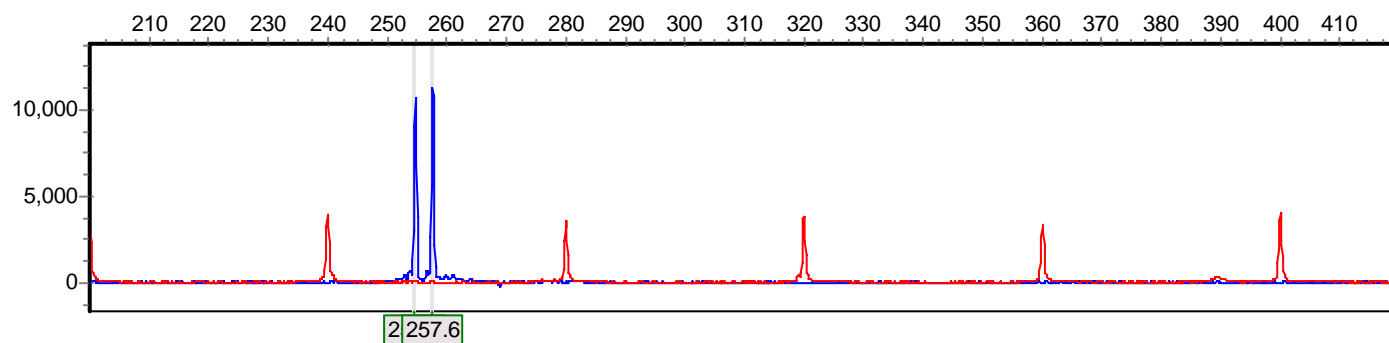

**Sample 23** 23\_G03.fsa Run date and time: 01/05/2017 - 08:54:22 -> 01/05/2017 - 09:38:13

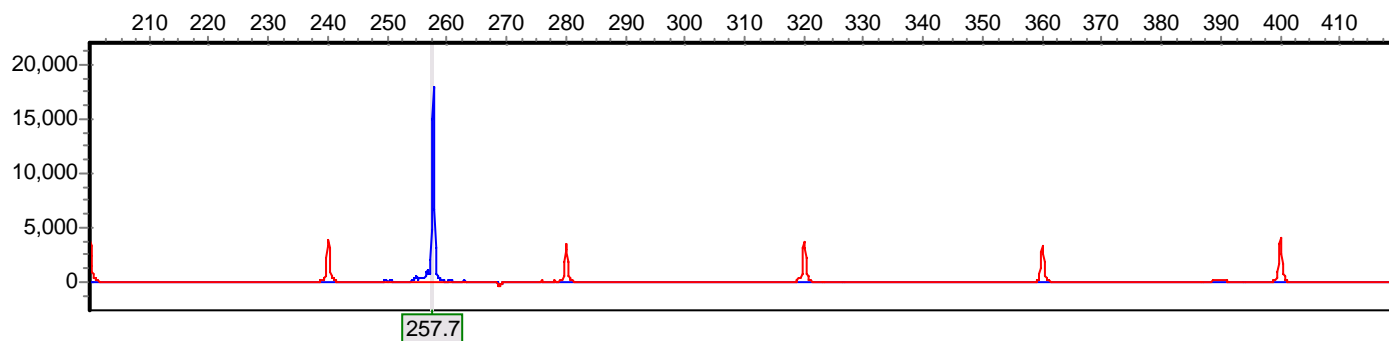

**Sample 24** 24\_H03.fsa Run date and time: 01/05/2017 - 08:54:22 -> 01/05/2017 - 09:38:13

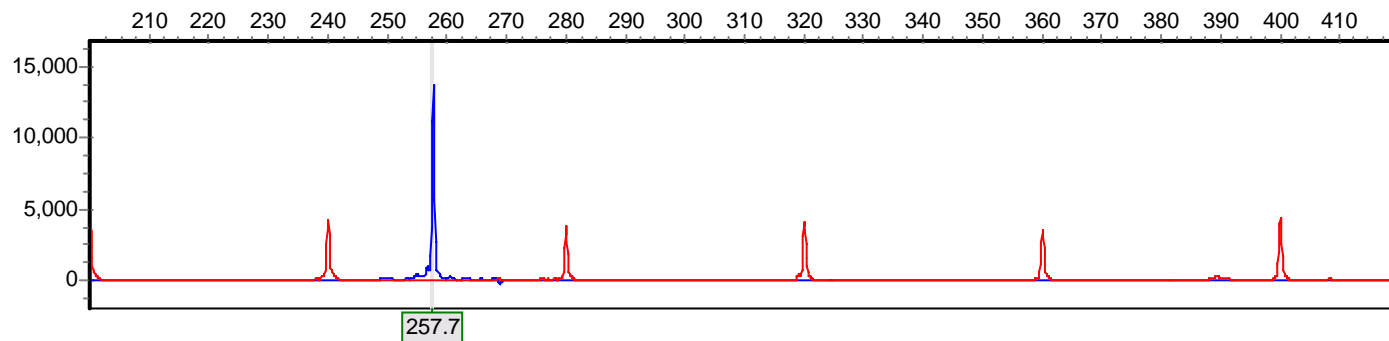

**Sample 25:** 25\_A04.fsa Run date and time: 01/05/2017 - 08:54:22 -> 01/05/2017 - 09:38:13

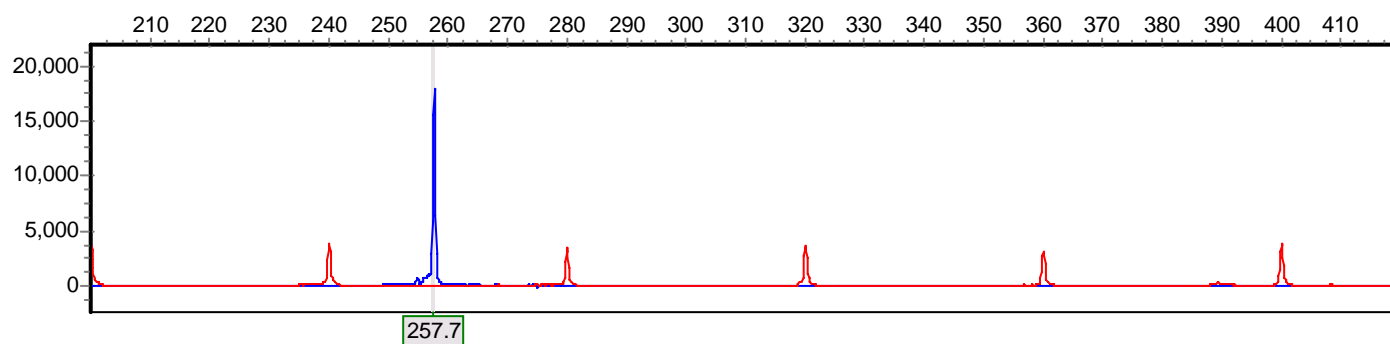

**Sample 26:** 26\_B04.fsa Run date and time: 01/05/2017 - 08:54:22 -> 01/05/2017 - 09:38:13

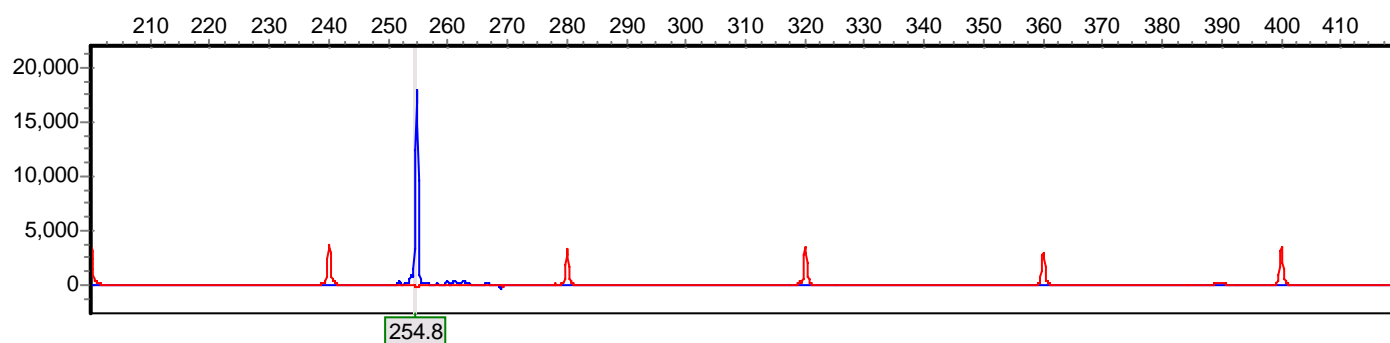

**Sample 27:** 27\_C04.fsa Run date and time: 01/05/2017 - 08:54:22 -> 01/05/2017 - 09:38:13

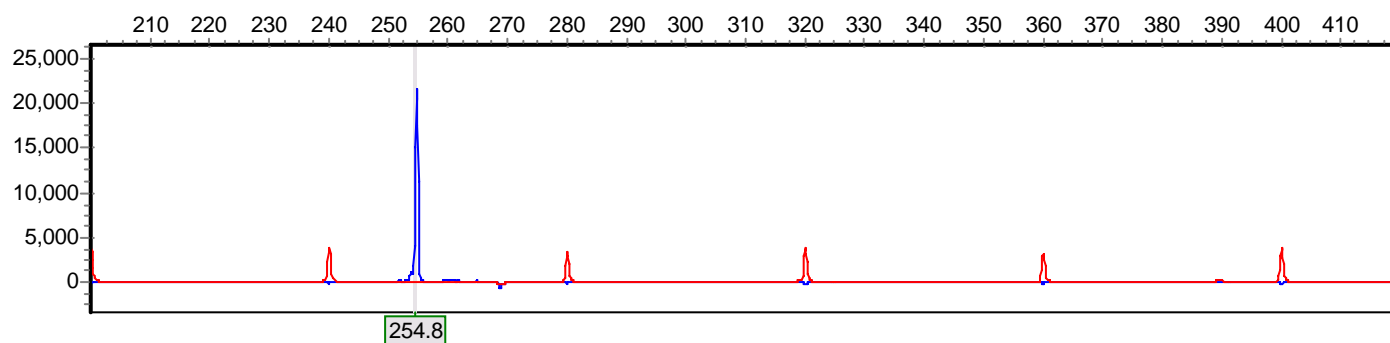

**Sample 28:** 28\_D04.fsa Run date and time: 01/05/2017 - 08:54:22 -> 01/05/2017 - 09:38:13

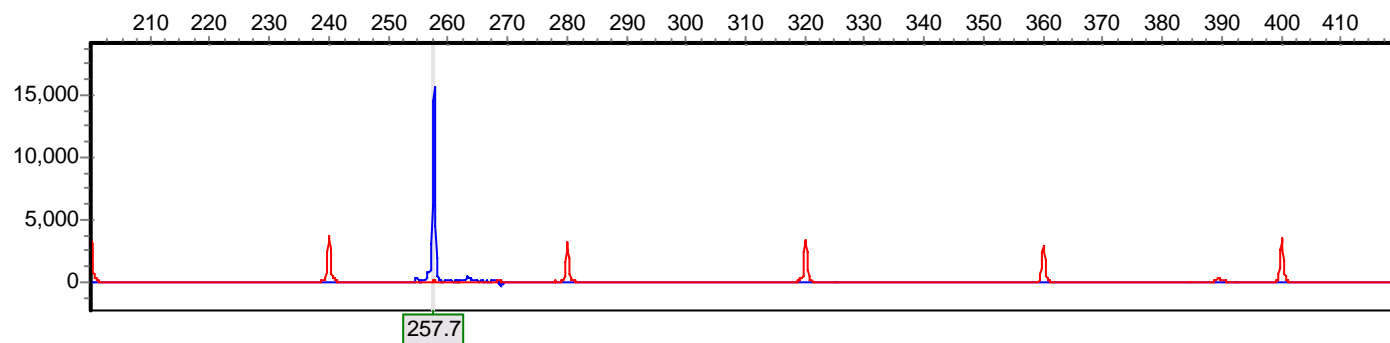

**Sample 29:** 29\_E04.fsa Run date and time: 01/05/2017 - 08:54:22 -> 01/05/2017 - 09:38:13

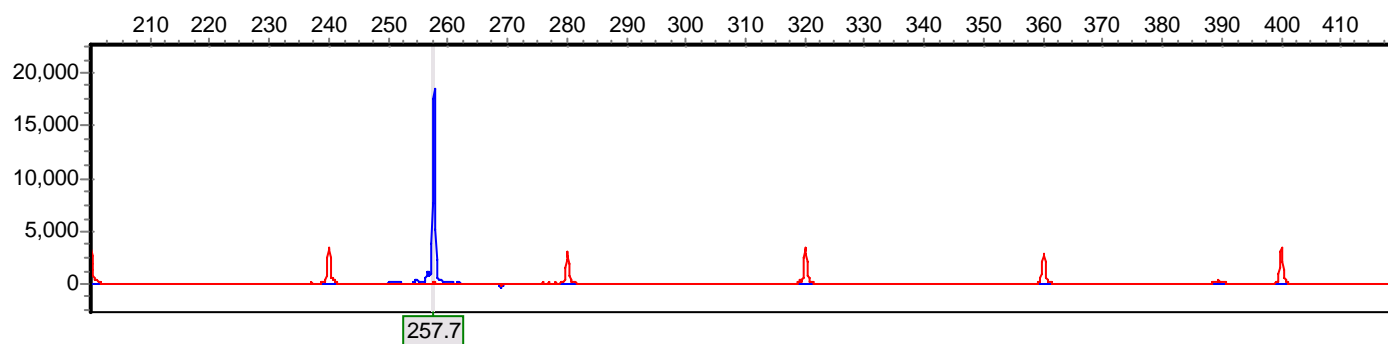

**Sample 30:** 30\_F04.fsa Run date and time: 01/05/2017 - 08:54:22 -> 01/05/2017 - 09:38:13

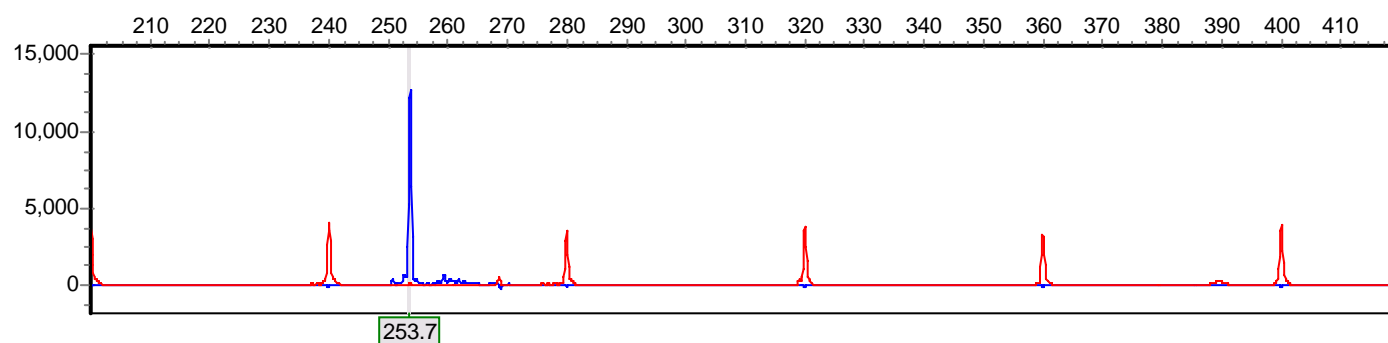

**Sample 31:** 31\_G04.fsa Run date and time: 01/05/2017 - 08:54:22 -> 01/05/2017 - 09:38:13

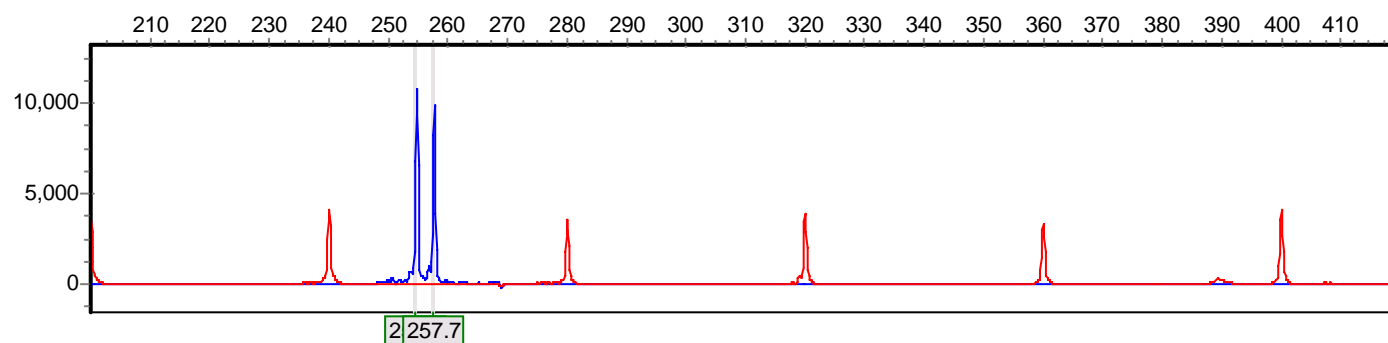

**Sample 32:** 32\_H04.fsa Run date and time: 01/05/2017 - 08:54:22 -> 01/05/2017 - 09:38:13

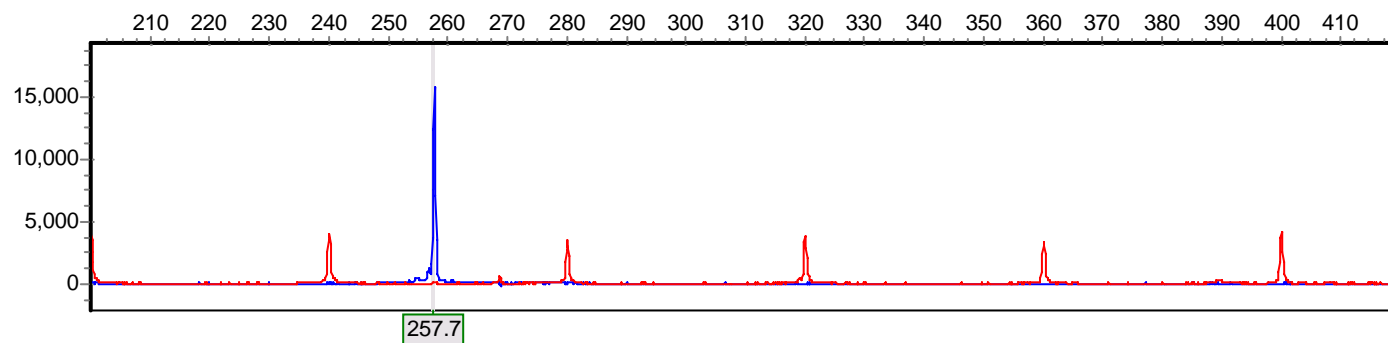



**Sample 33:** 33\_A05.fsa Run date and time: 01/05/2017 - 08:54:22 -> 01/05/2017 - 09:38:13

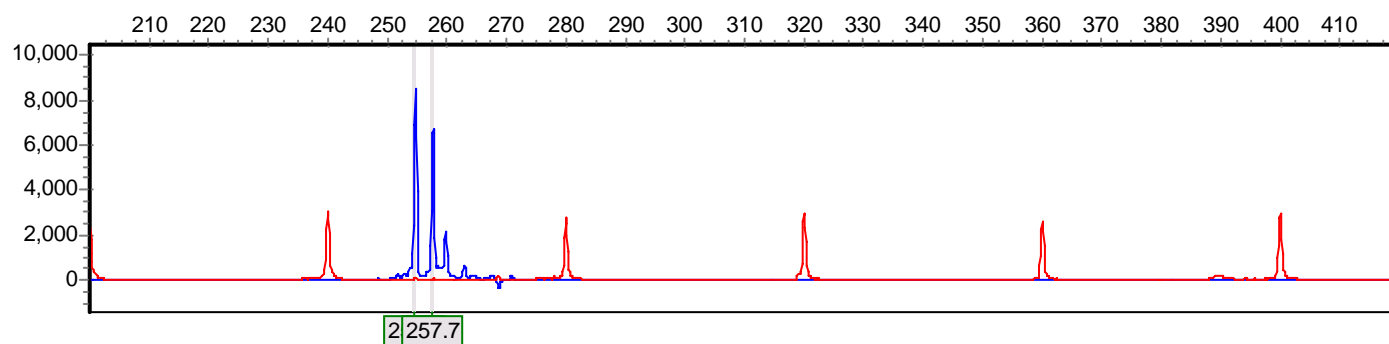

**Sample 34:** 34\_B05.fsa Run date and time: 01/05/2017 - 08:54:22 -> 01/05/2017 - 09:38:13

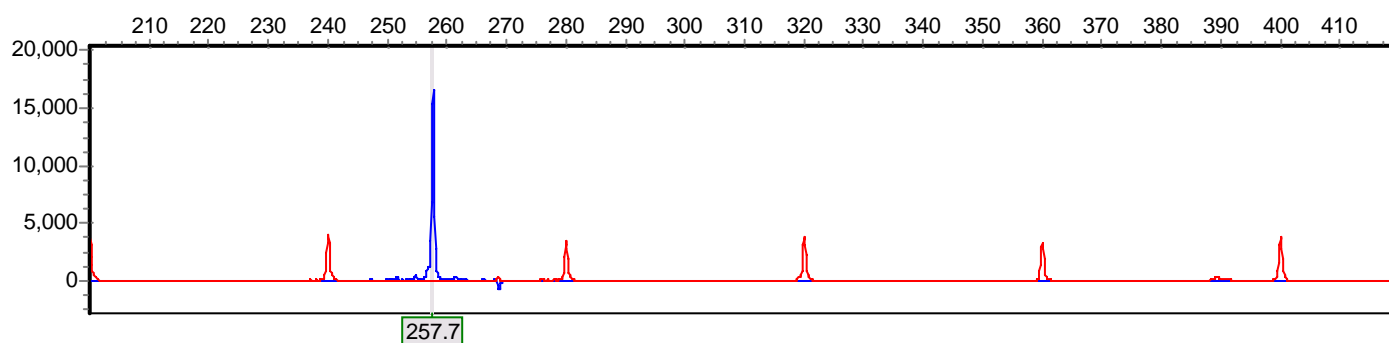

**Sample 35:** 35\_C05.fsa Run date and time: 01/05/2017 - 08:54:22 -> 01/05/2017 - 09:38:13

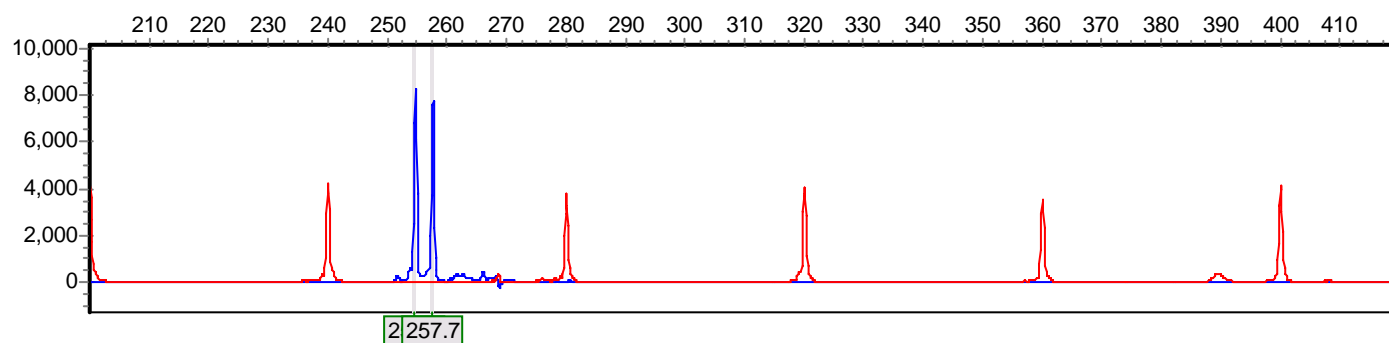

**Sample 36:** 36\_D05.fsa Run date and time: 01/05/2017 - 08:54:22 -> 01/05/2017 - 09:38:13

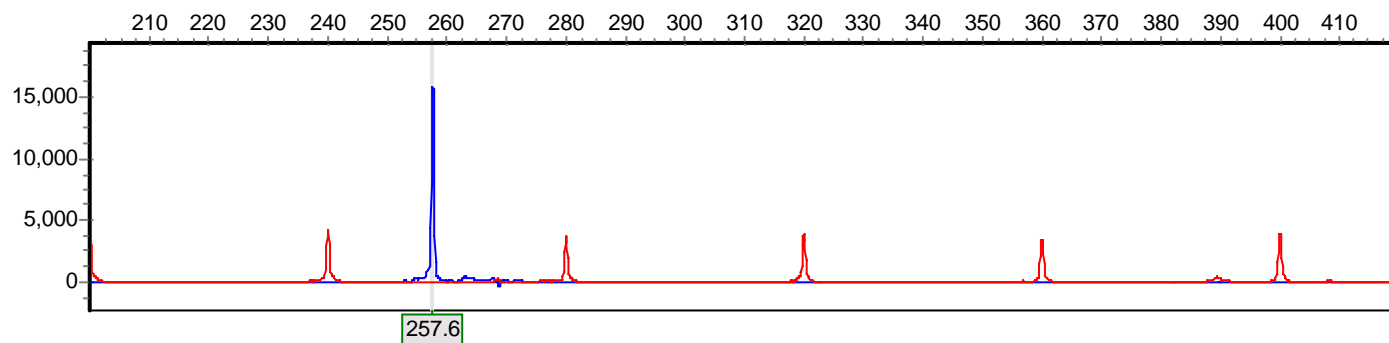

Sample 37: 37\_E05.fsa    Run date and time: 01/05/2017 - 08:54:22 -> 01/05/2017 - 09:38:13

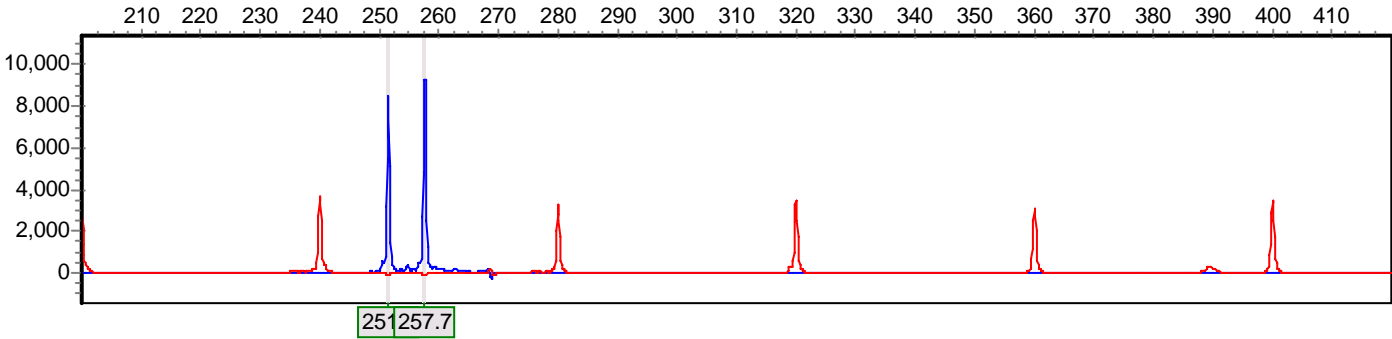

Sample 38: 38\_F05.fsa    Run date and time: 01/05/2017 - 08:54:22 -> 01/05/2017 - 09:38:13

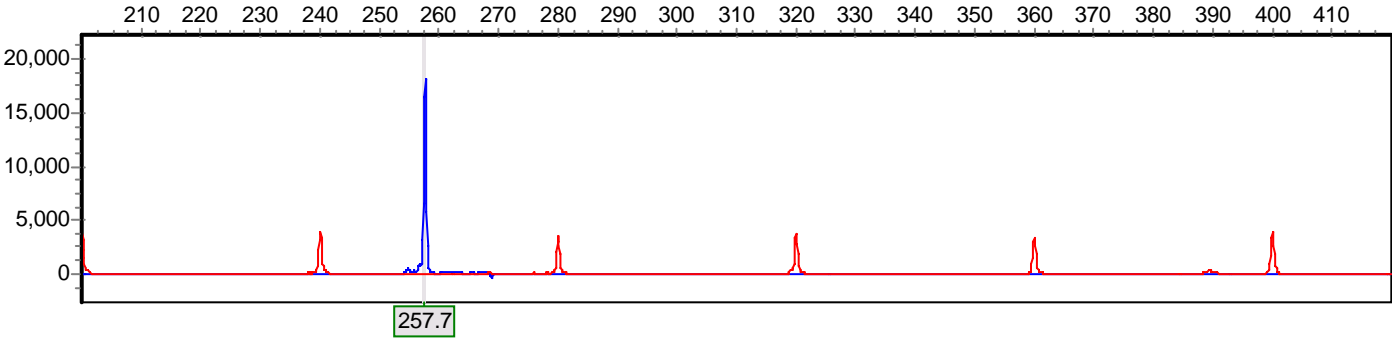

Sample 39: 39\_G05.fsa    Run date and time: 01/05/2017 - 08:54:22 -> 01/05/2017 - 09:38:13

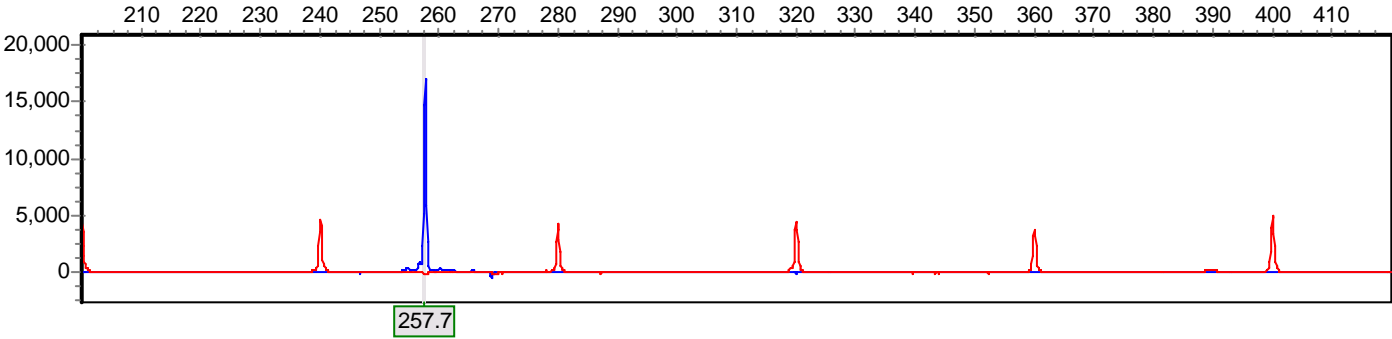

Sample 40: 40\_H05.fsa    Run date and time: 01/05/2017 - 08:54:22 -> 01/05/2017 - 09:38:13

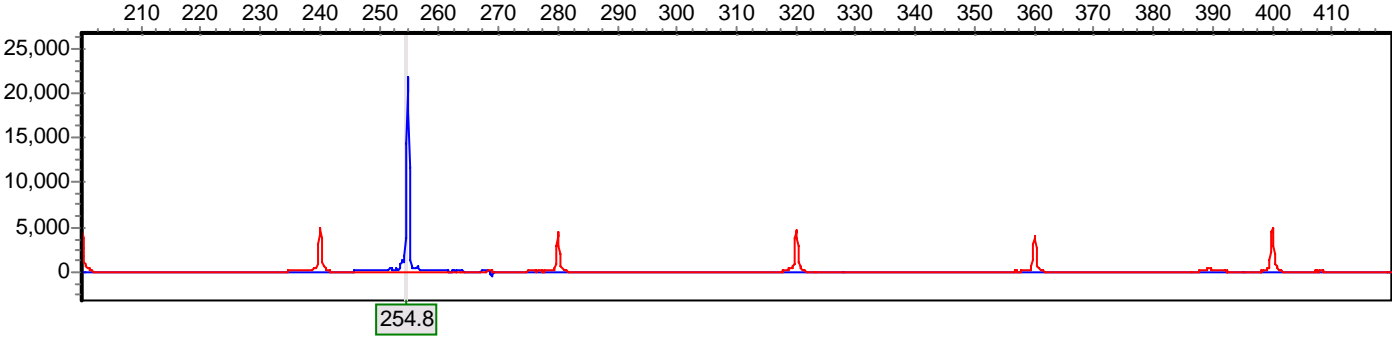

**Sample 41:** 41\_A06.fsa Run date and time: 01/05/2017 - 08:54:22 -> 01/05/2017 - 09:38:13

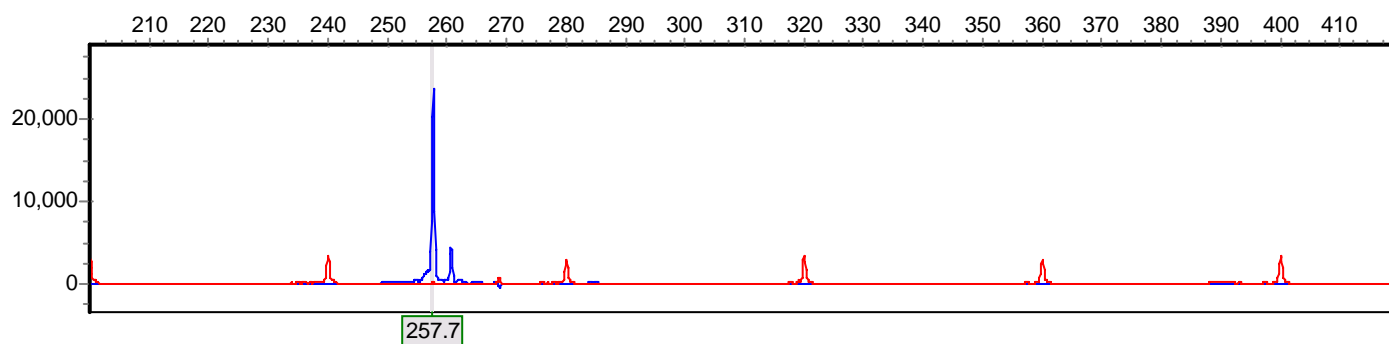

**Sample 42:** 42\_B06.fsa Run date and time: 01/05/2017 - 08:54:22 -> 01/05/2017 - 09:38:13

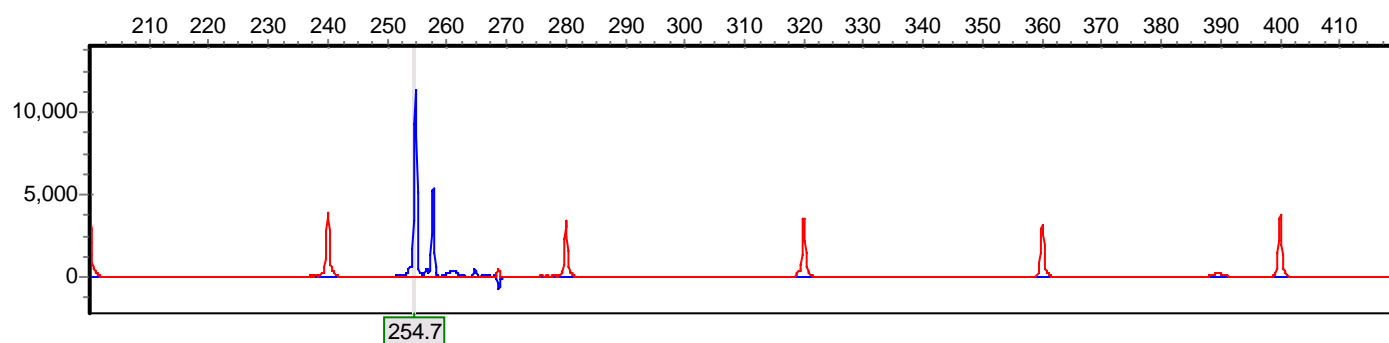

**Sample 43:** 43\_C06.fsa Run date and time: 01/05/2017 - 08:54:22 -> 01/05/2017 - 09:38:13

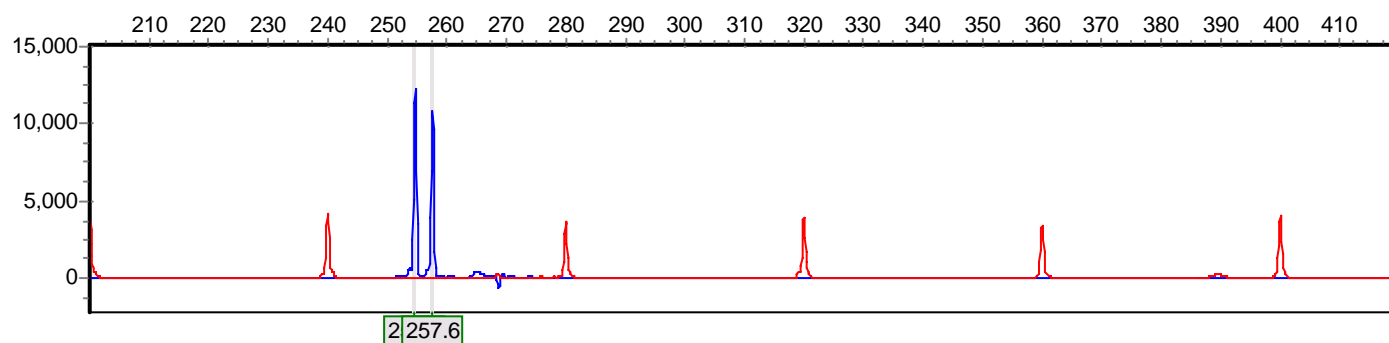

**Sample 44:** 44\_D06.fsa Run date and time: 01/05/2017 - 08:54:22 -> 01/05/2017 - 09:38:13

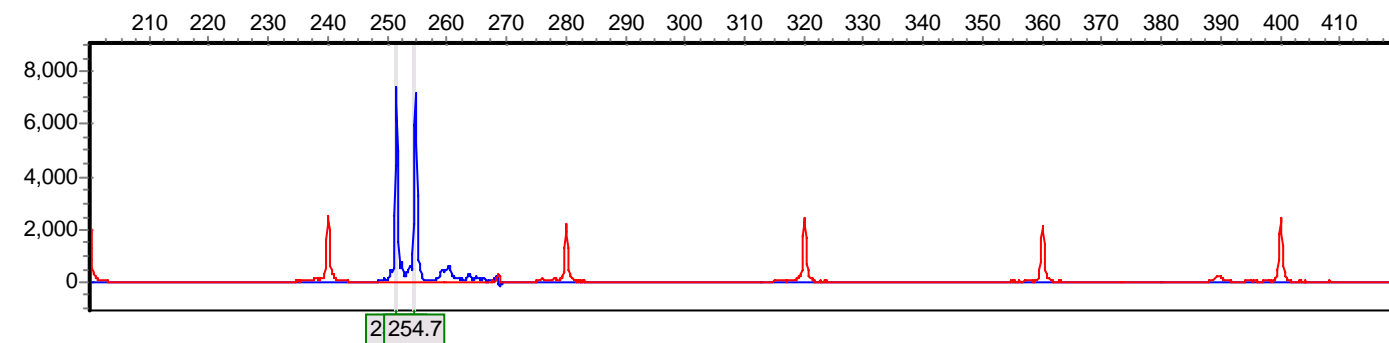

**Sample 45:** 45\_E06.fsa Run date and time: 01/05/2017 - 08:54:22 -> 01/05/2017 - 09:38:13

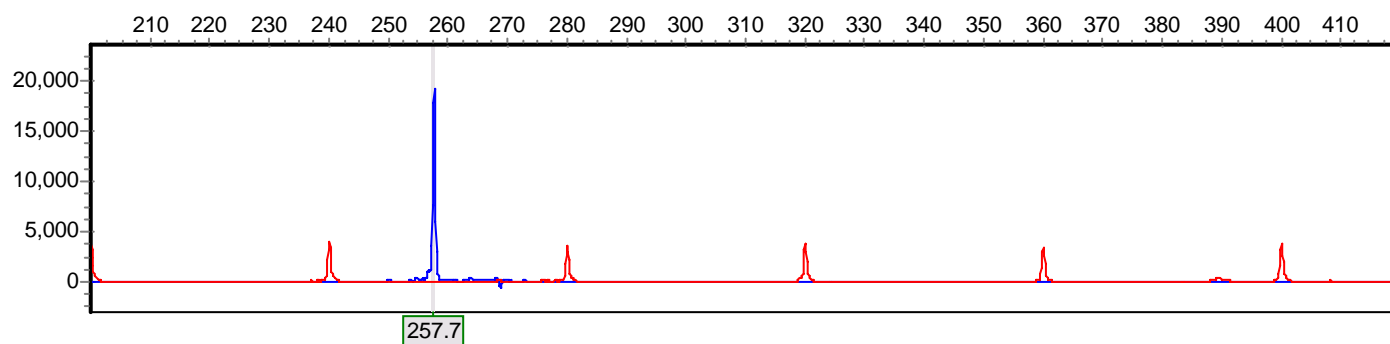

**Sample 46:** 46\_F06.fsa Run date and time: 01/05/2017 - 08:54:22 -> 01/05/2017 - 09:38:13

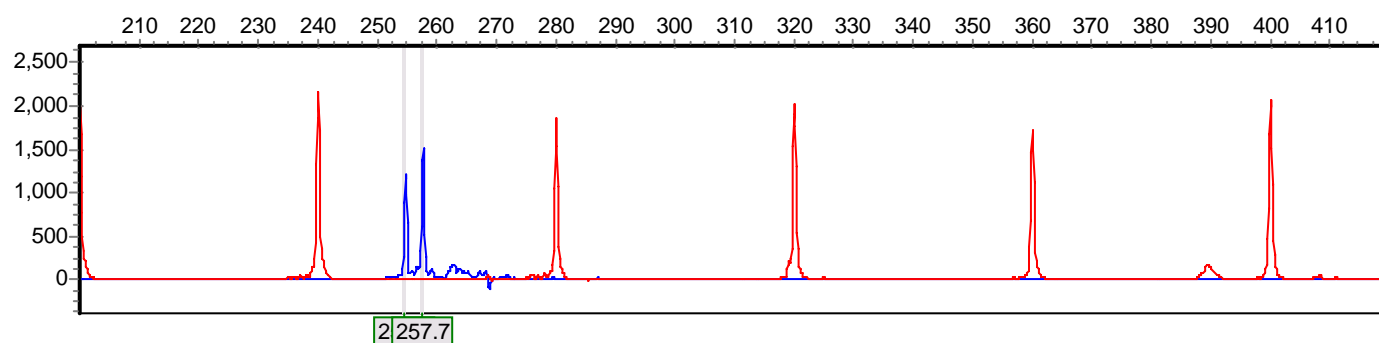

**Sample 47:** 47H100.fsa Run date and time: 12/31/2016 - 12:23:44 -> 12/31/2016 - 13:07:04

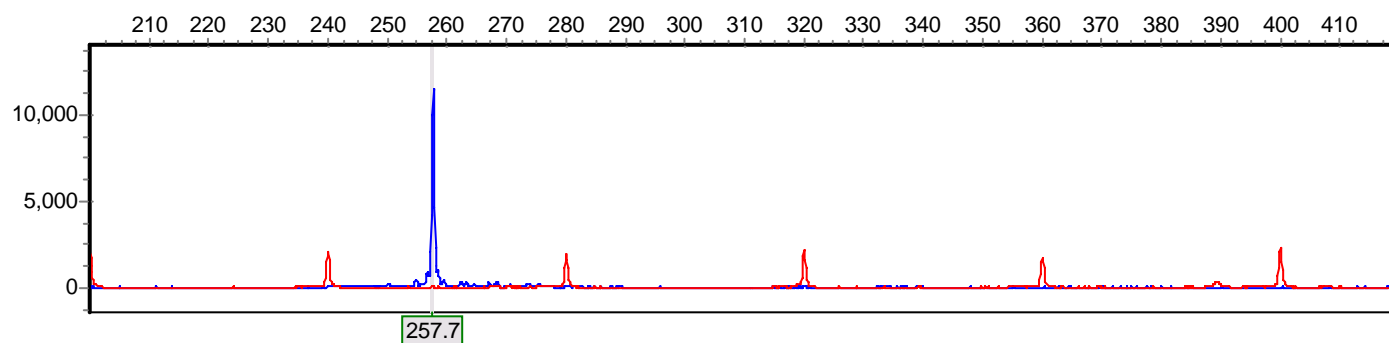

**Sample 48:** 48H102.fsa Run date and time: 12/31/2016 - 12:23:44 -> 12/31/2016 - 13:07:04

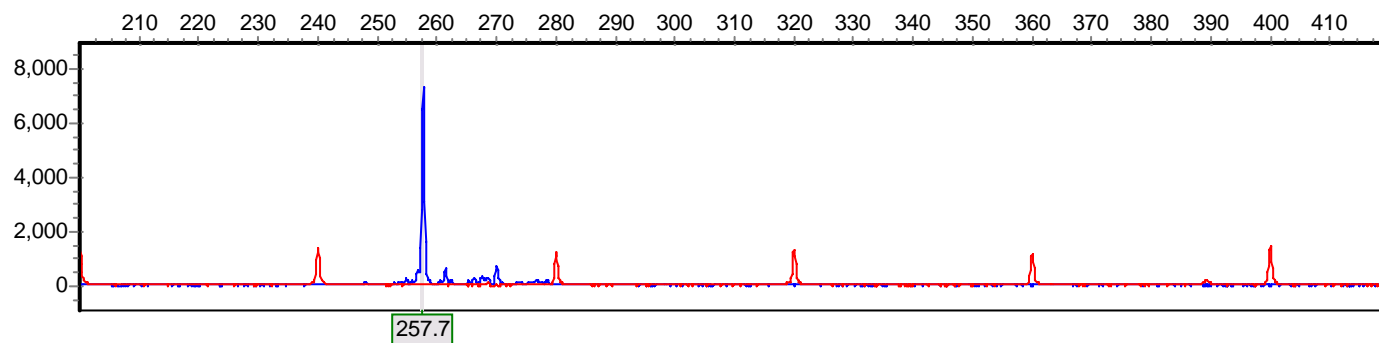

**Sample 49:** H106.fsa Run date and time: 12/31/2016 - 12:23:44 -> 12/31/2016 - 13:07:04

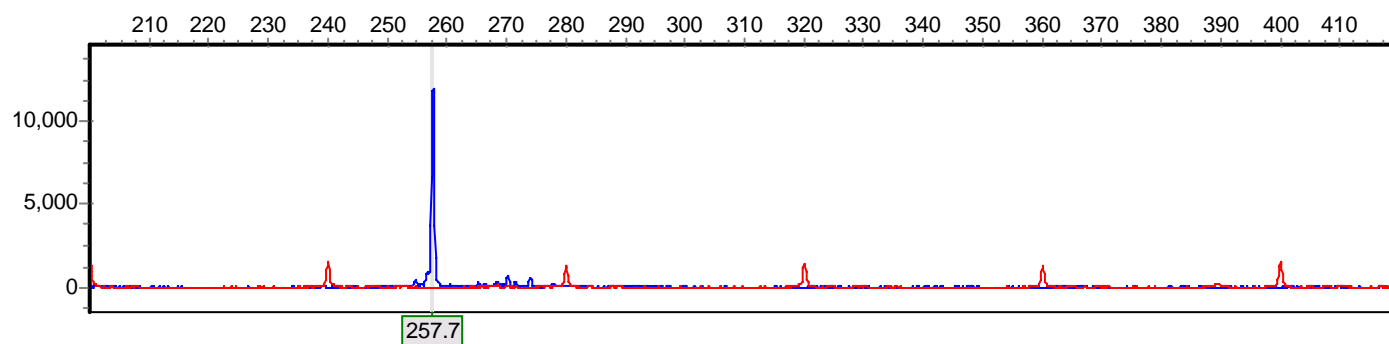

**Sample 50**H107.fsa Run date and time: 12/31/2016 - 12:23:44 -> 12/31/2016 - 13:07:04

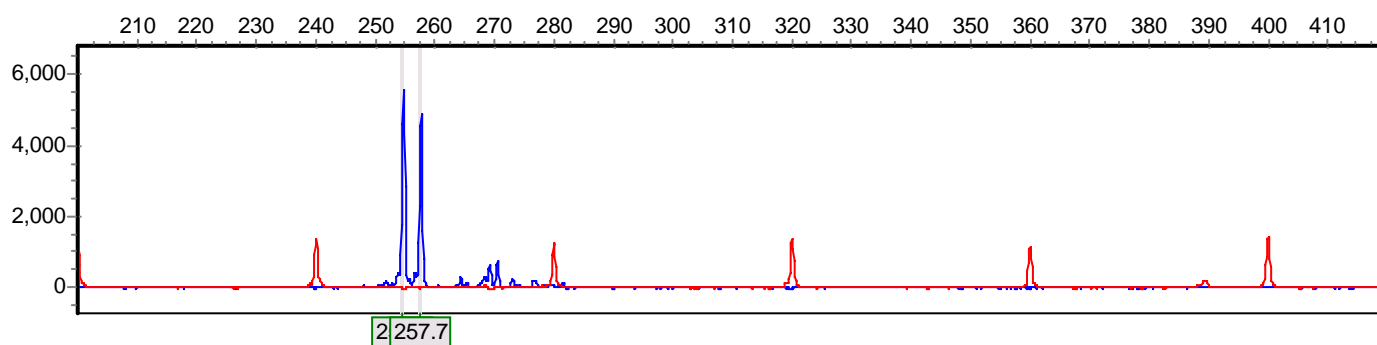

**Sample 51**H108.fsa Run date and time: 12/31/2016 - 12:23:44 -> 12/31/2016 - 13:07:04

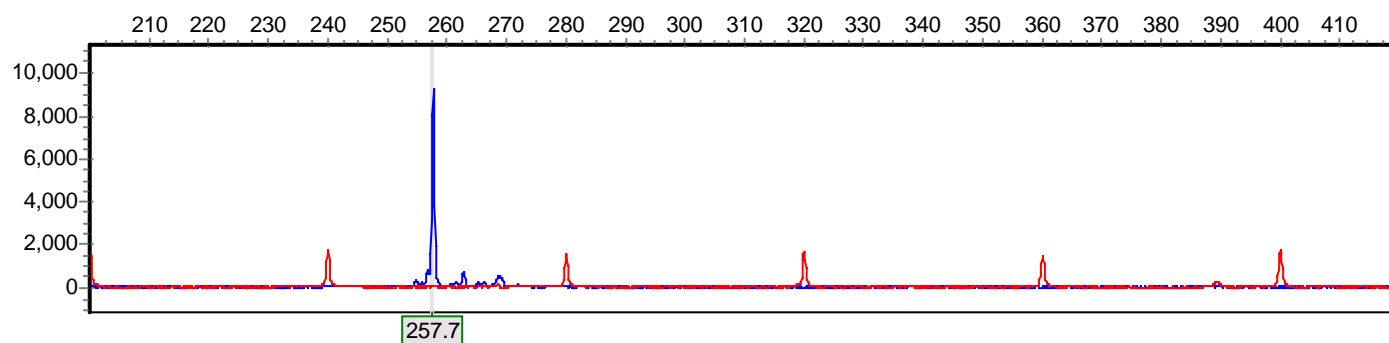

**Sample 52**H110.fsa Run date and time: 12/31/2016 - 12:23:44 -> 12/31/2016 - 13:07:04

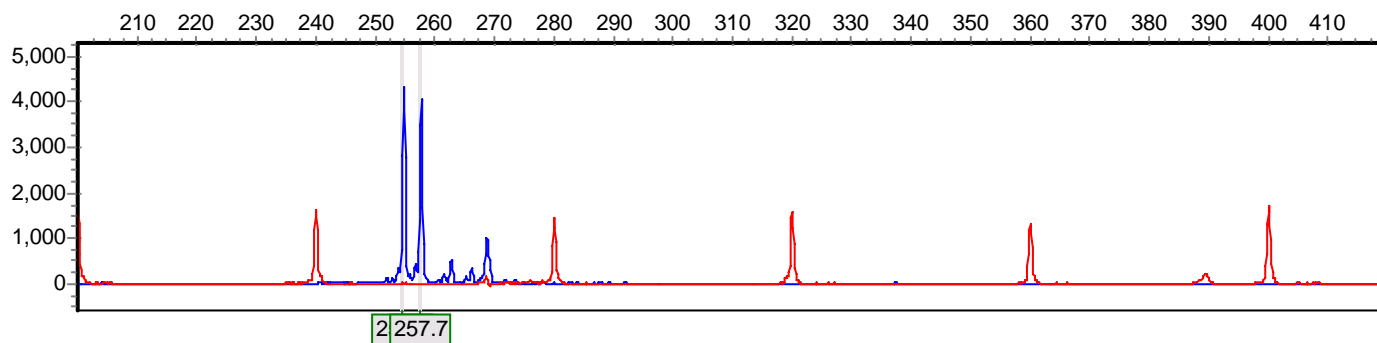

Sample 53: H111.fsa    Run date and time: 12/31/2016 - 12:23:44 -> 12/31/2016 - 13:07:04

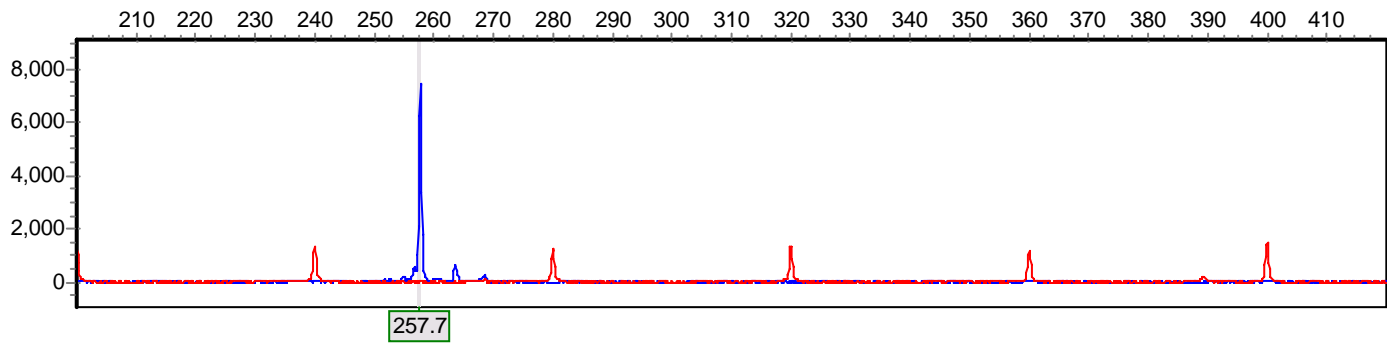

Supplement: s1 [file s1]
