# Supplementary material
Source: MDPI journal article supplement (https://www.mdpi.com/1999-4907/10/3/225)

**Sample 1:** 01\_A01.fsa Run date and time: 09/22/2017 - 14:52:02 -> 09/22/2017 - 15:34:31

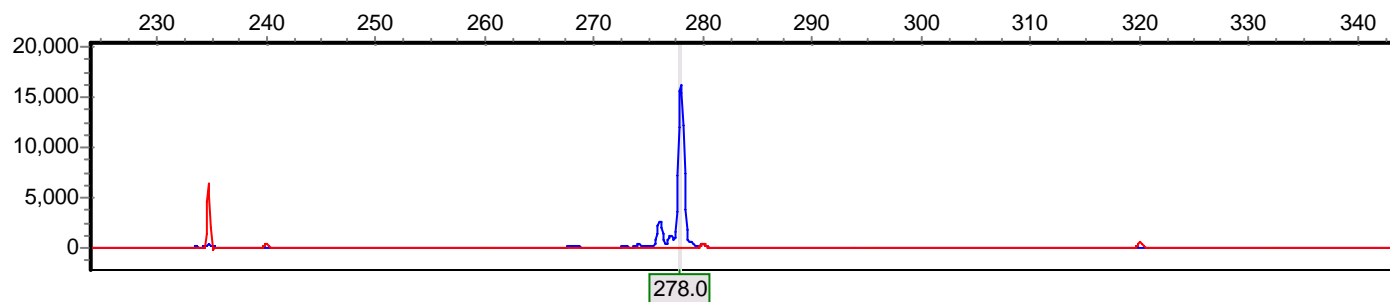

**Sample 2:** 02\_B01.fsa Run date and time: 09/22/2017 - 14:52:02 -> 09/22/2017 - 15:34:31

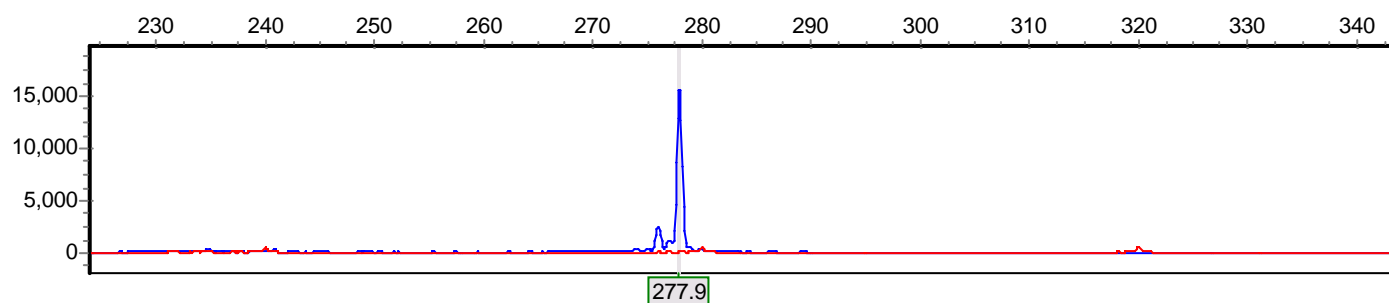

**Sample 3:** 03\_C01.fsa Run date and time: 09/22/2017 - 14:52:02 -> 09/22/2017 - 15:34:31

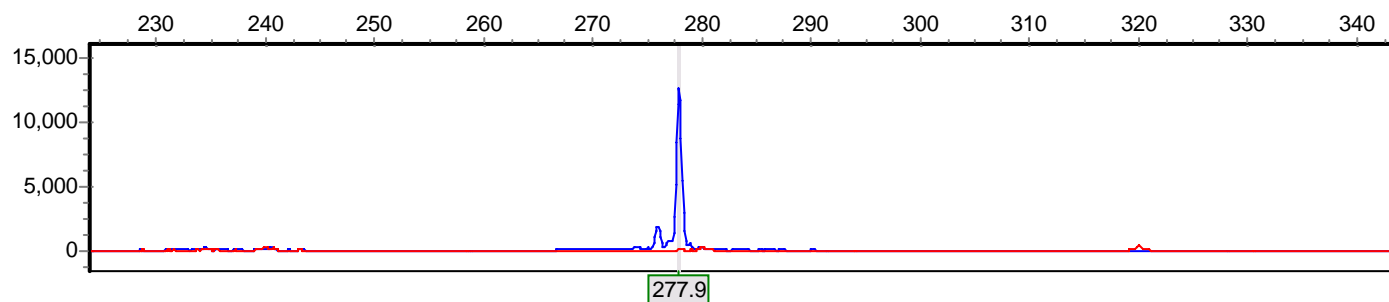

**Sample 4:** 04\_D01.fsa Run date and time: 09/22/2017 - 14:52:02 -> 09/22/2017 - 15:34:31

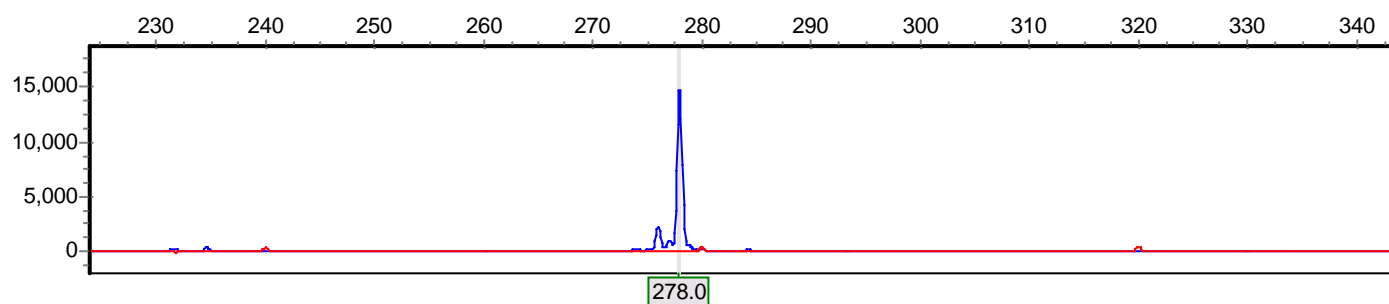

**Sample 5:** 05\_E01.fsa Run date and time: 09/22/2017 - 14:52:02 -> 09/22/2017 - 15:34:31

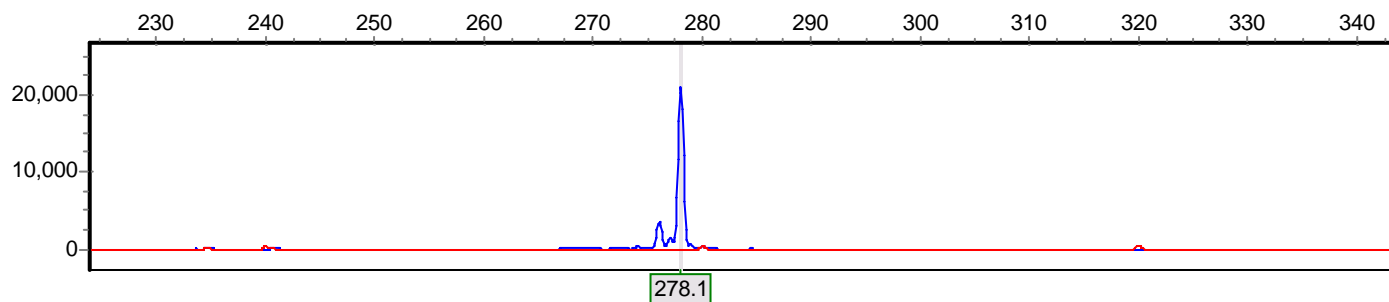

**Sample 6:** 06\_F01.fsa Run date and time: 09/22/2017 - 14:52:02 -> 09/22/2017 - 15:34:31

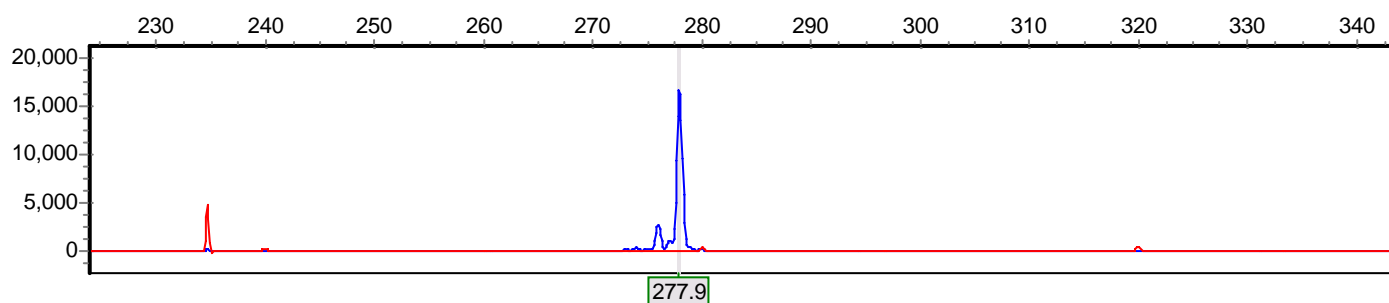

**Sample 7:** 07\_G01.fsa Run date and time: 09/22/2017 - 14:52:02 -> 09/22/2017 - 15:34:31

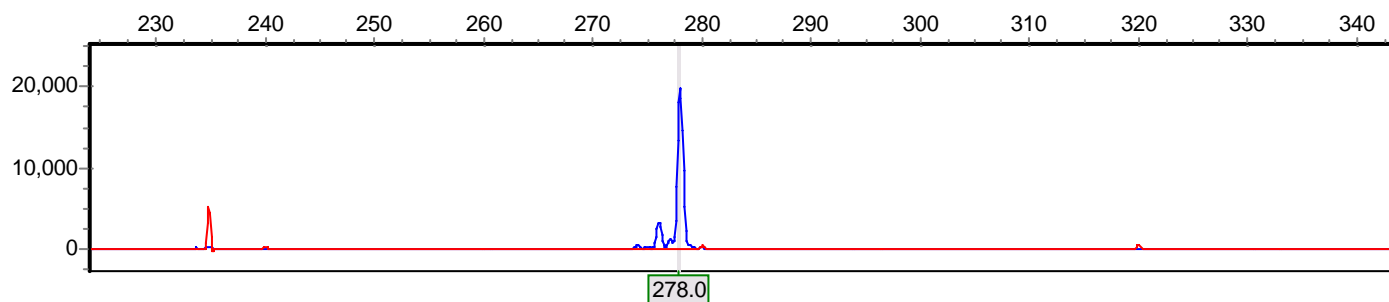

**Sample 8:** 08\_H01.fsa Run date and time: 09/22/2017 - 14:52:02 -> 09/22/2017 - 15:34:31

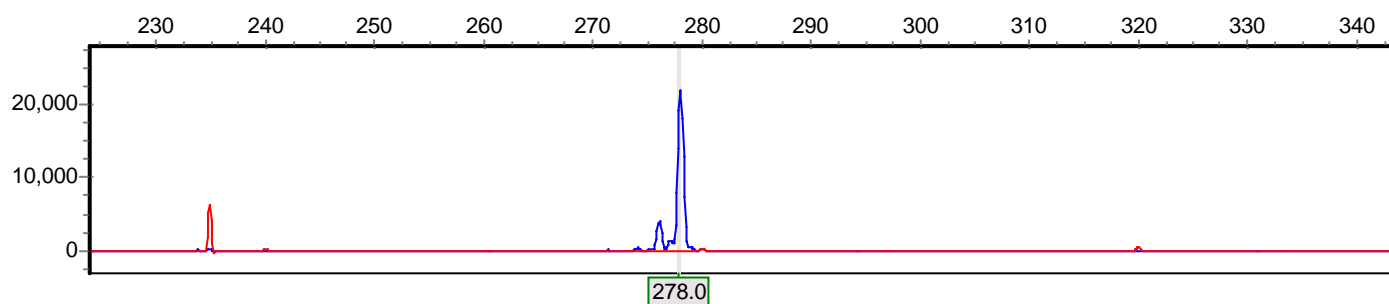

**Sample 9:** 09\_A02.fsa Run date and time: 09/22/2017 - 14:52:02 -> 09/22/2017 - 15:34:31

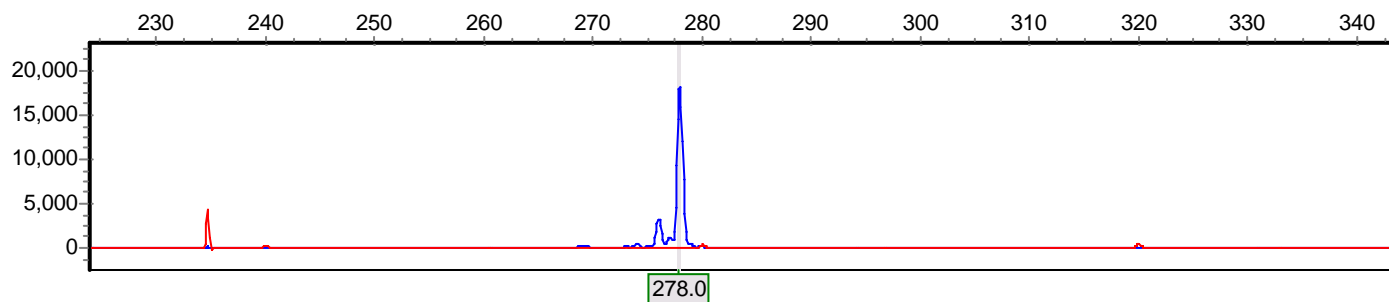

**Sample 10** 10\_B02.fsa Run date and time: 09/22/2017 - 14:52:02 -> 09/22/2017 - 15:34:31

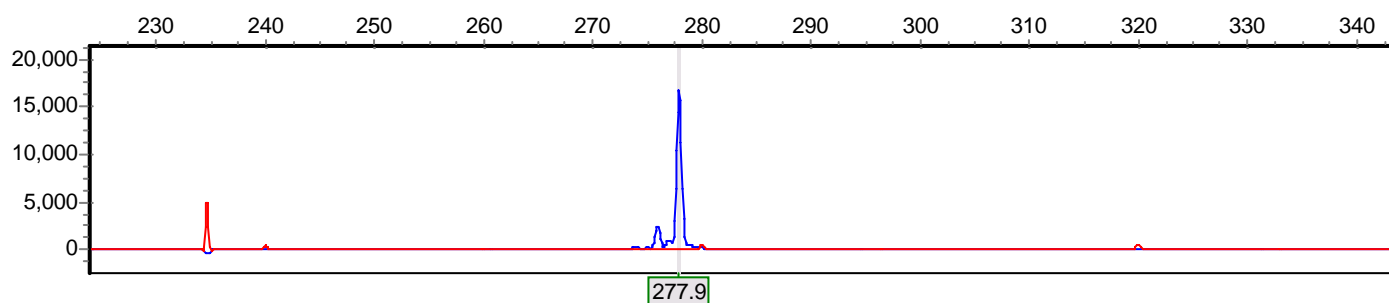

**Sample 11** 11\_C02.fsa Run date and time: 09/22/2017 - 14:52:02 -> 09/22/2017 - 15:34:31

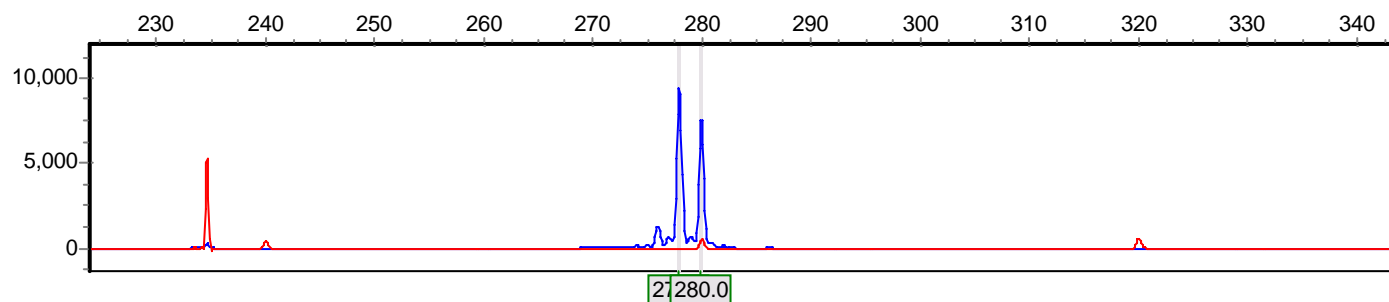

**Sample 12** 12\_D02.fsa Run date and time: 09/22/2017 - 14:52:02 -> 09/22/2017 - 15:34:31

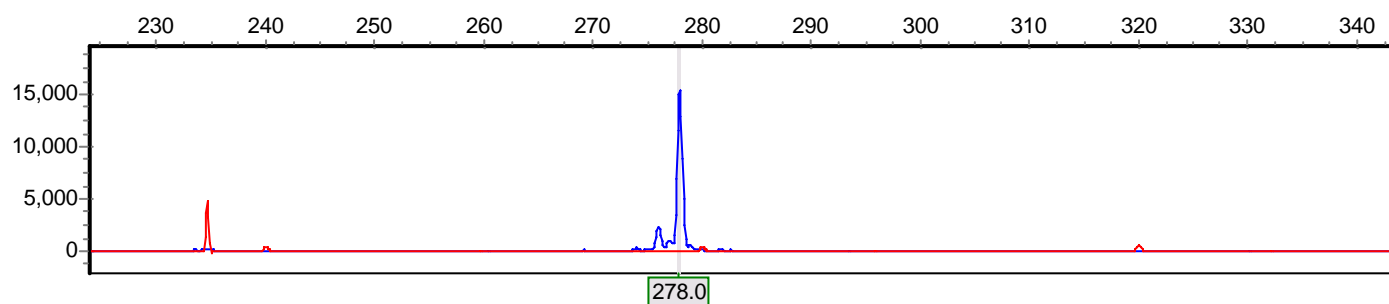

**Sample 13:** 13\_E02.fsa Run date and time: 09/22/2017 - 14:52:02 -> 09/22/2017 - 15:34:31

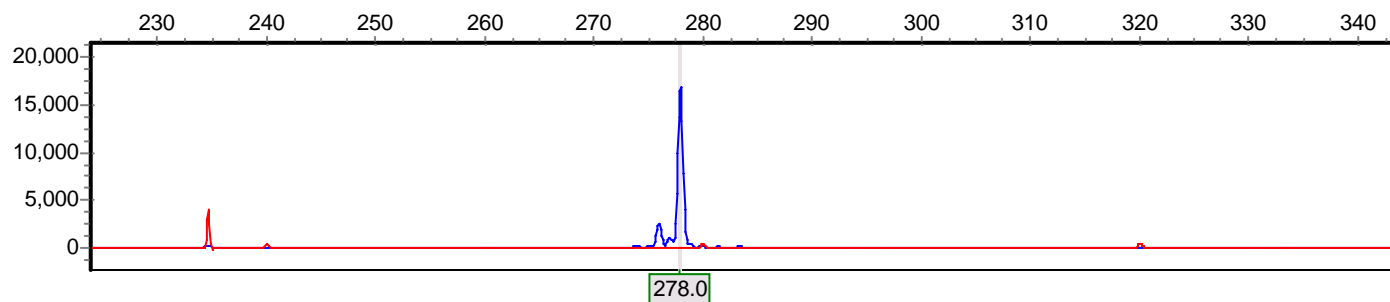

**Sample 14** 14\_F02.fsa Run date and time: 09/22/2017 - 14:52:02 -> 09/22/2017 - 15:34:31

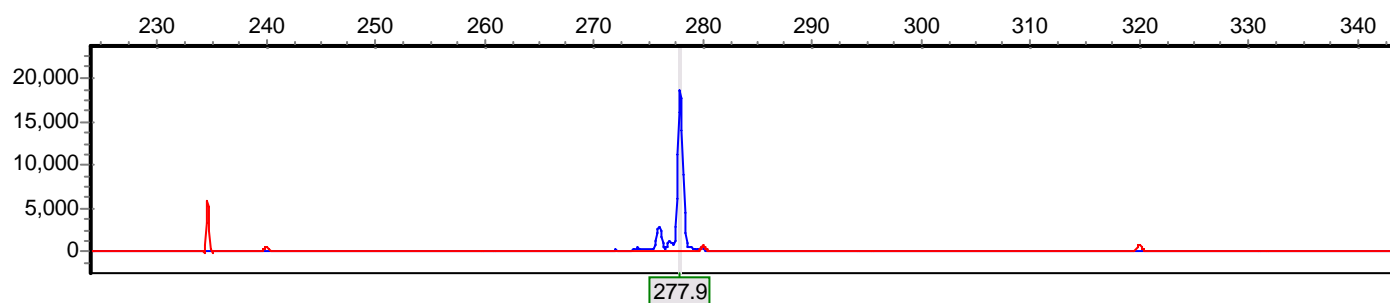

**Sample 15** 15\_G02.fsa Run date and time: 09/22/2017 - 14:52:02 -> 09/22/2017 - 15:34:31

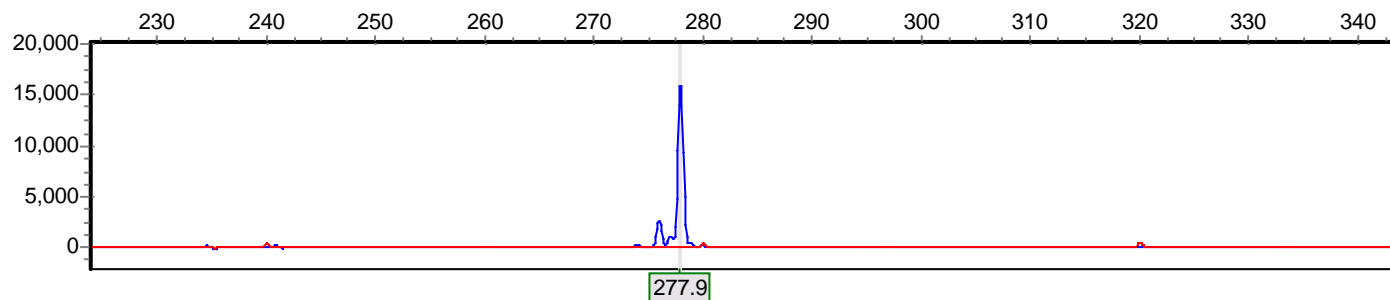

**Sample 16** 16\_H02.fsa Run date and time: 09/22/2017 - 14:52:02 -> 09/22/2017 - 15:34:31

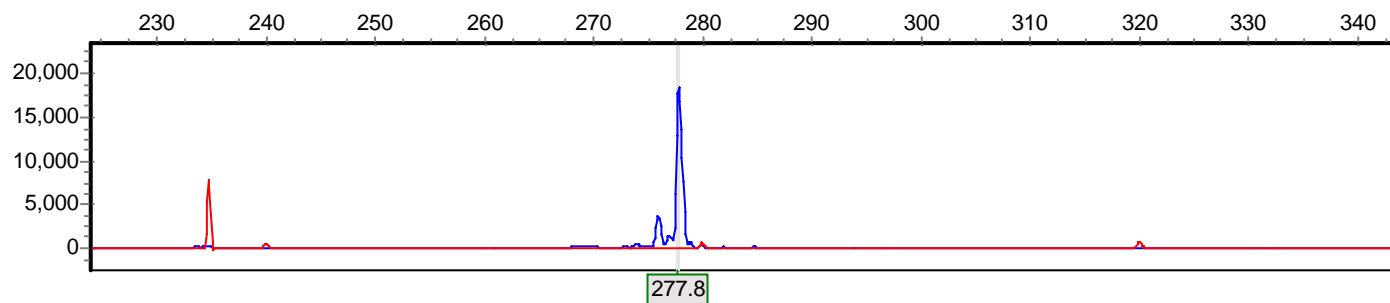

**Sample 17:** 17\_A03.fsa Run date and time: 09/22/2017 - 14:52:02 -> 09/22/2017 - 15:34:31

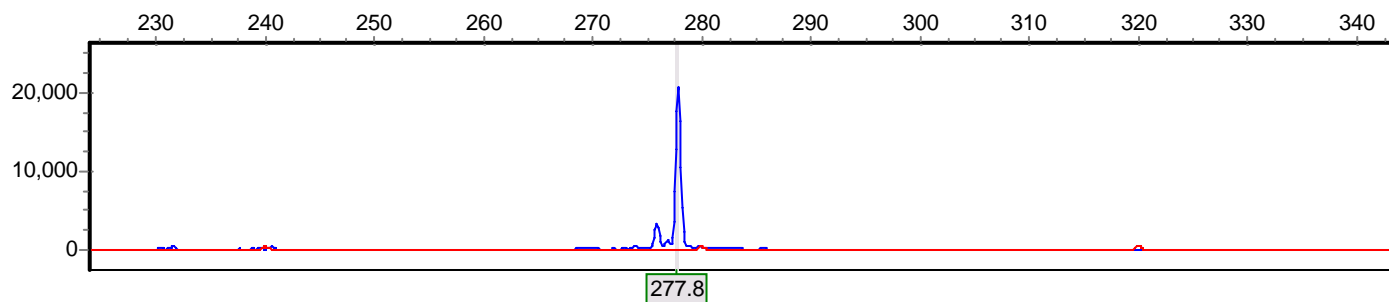

**Sample 18** 18\_B03.fsa Run date and time: 09/22/2017 - 14:52:02 -> 09/22/2017 - 15:34:31

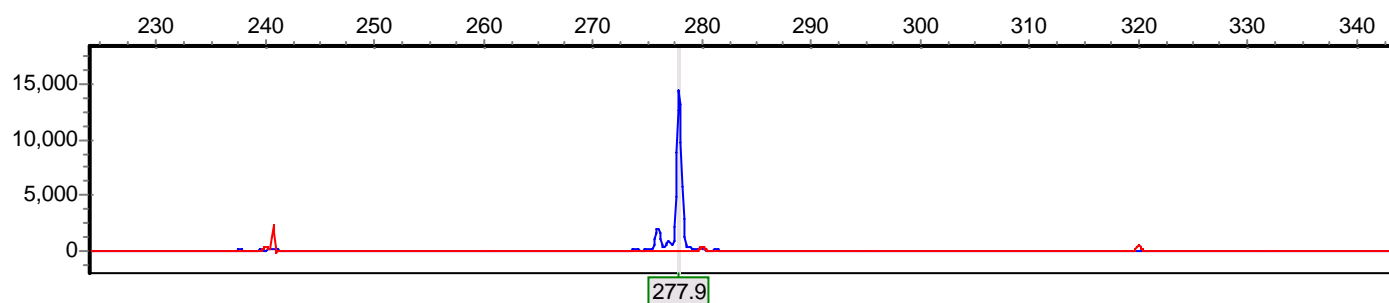

**Sample 19** 19\_C03.fsa Run date and time: 09/22/2017 - 14:52:02 -> 09/22/2017 - 15:34:31

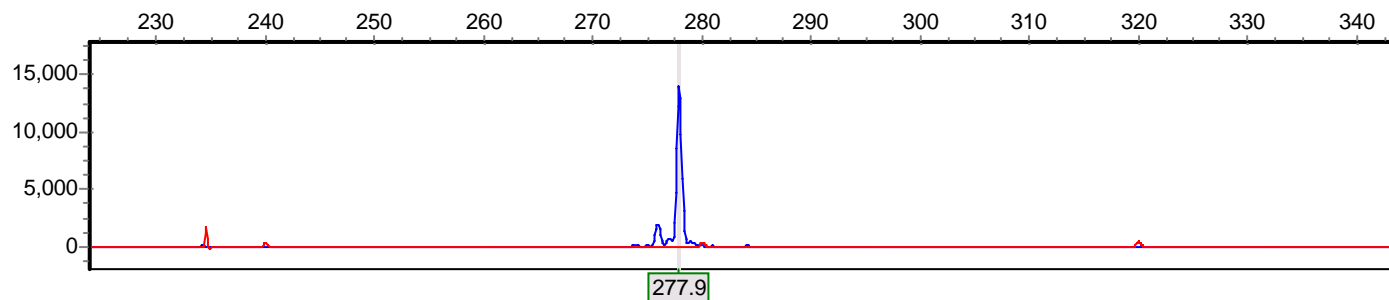

**Sample 20** 20\_D03.fsa Run date and time: 09/22/2017 - 14:52:02 -> 09/22/2017 - 15:34:31

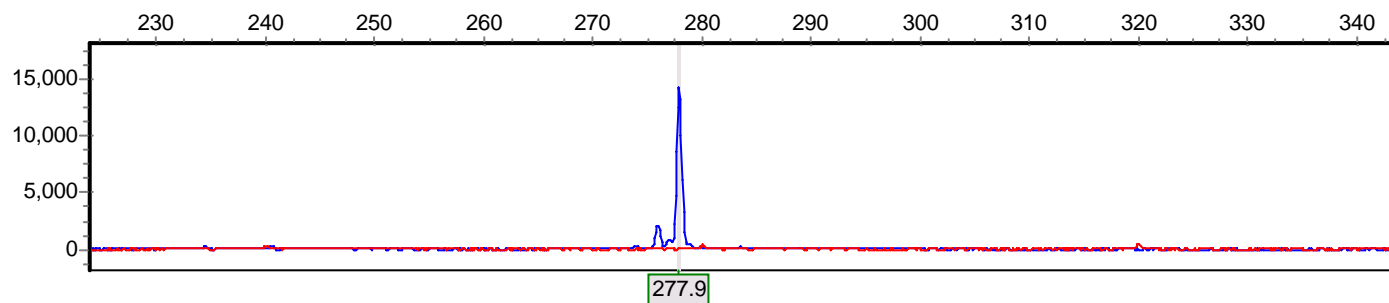

**Sample 21:** 21\_E03.fsa Run date and time: 09/22/2017 - 14:52:02 -> 09/22/2017 - 15:34:31

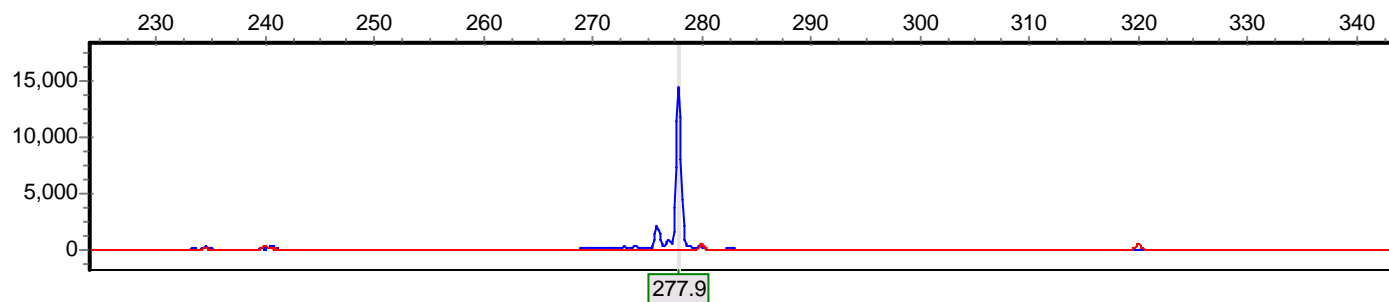

**Sample 22** 22\_F03.fsa Run date and time: 09/22/2017 - 14:52:02 -> 09/22/2017 - 15:34:31

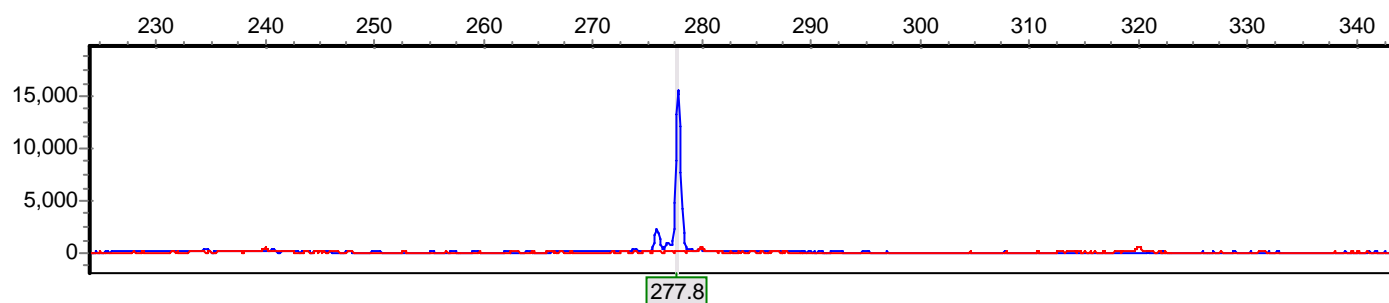

**Sample 23** 23\_G03.fsa Run date and time: 09/22/2017 - 14:52:02 -> 09/22/2017 - 15:34:31

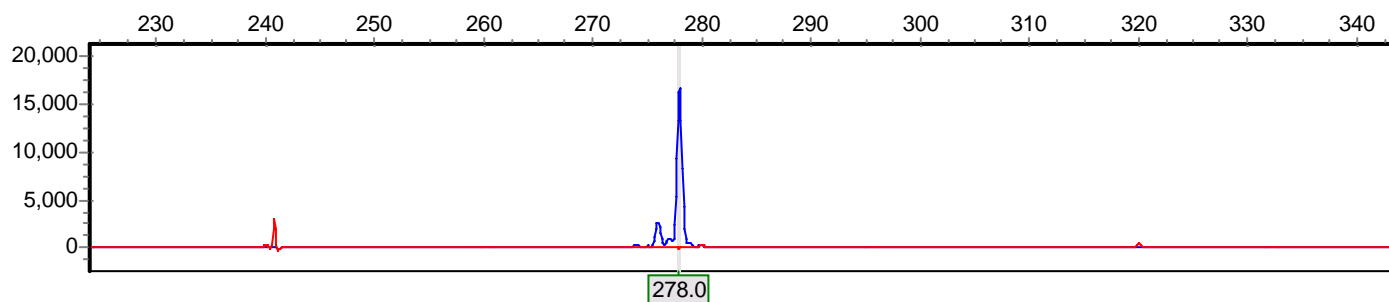

**Sample 24** 24\_H03.fsa Run date and time: 09/22/2017 - 14:52:02 -> 09/22/2017 - 15:34:31

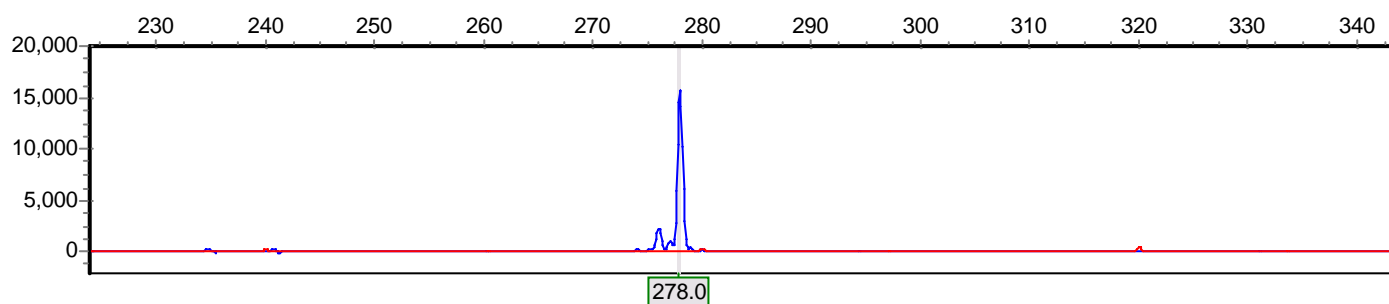

**Sample 25:** 25\_A04.fsa Run date and time: 09/22/2017 - 14:52:02 -> 09/22/2017 - 15:34:31

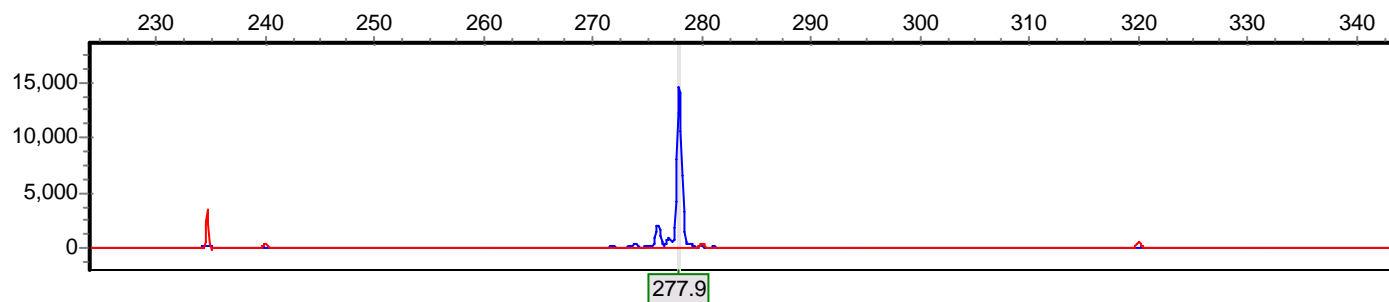

**Sample 26** 26\_B04.fsa Run date and time: 09/22/2017 - 14:52:02 -> 09/22/2017 - 15:34:31

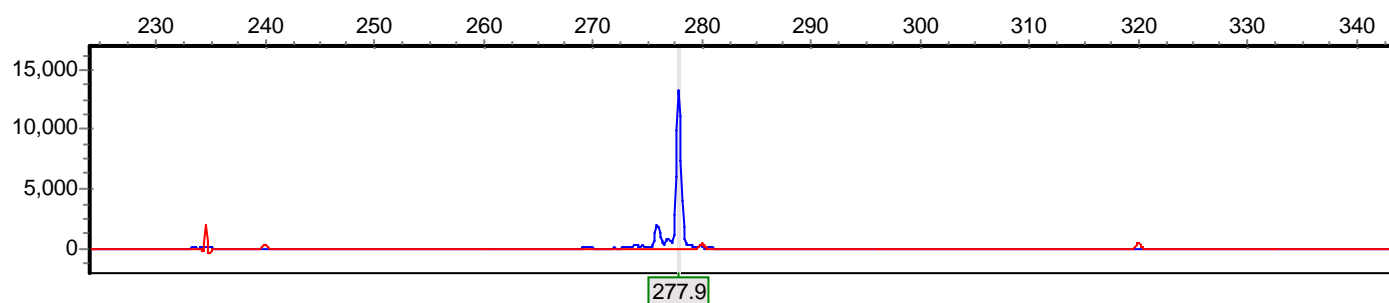

**Sample 27** 27\_C04.fsa Run date and time: 09/22/2017 - 14:52:02 -> 09/22/2017 - 15:34:31

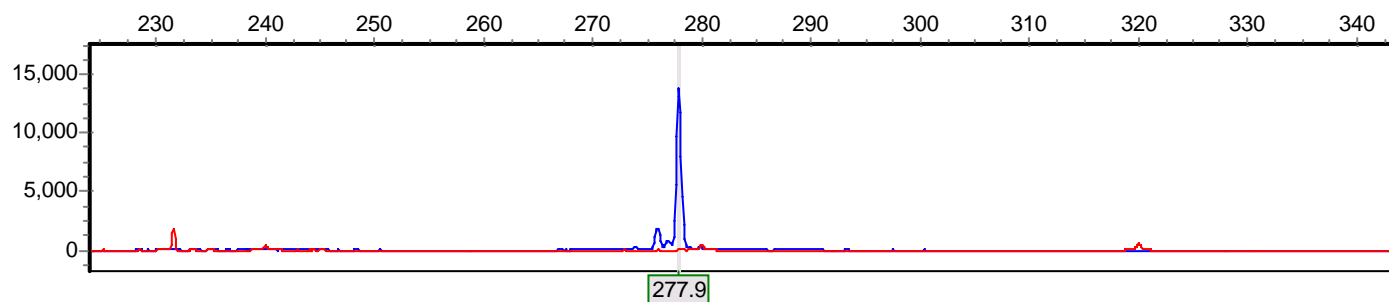

**Sample 28** 28\_D04.fsa Run date and time: 09/22/2017 - 14:52:02 -> 09/22/2017 - 15:34:31

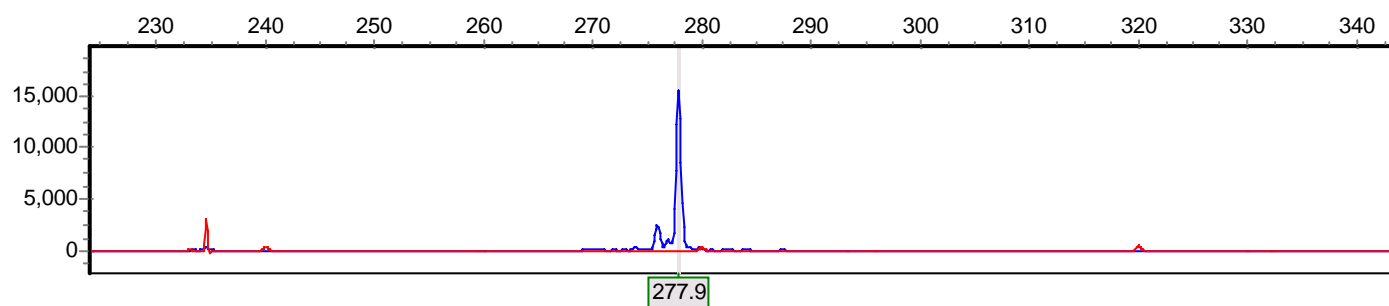

**Sample 29:** 29\_E04.fsa Run date and time: 09/22/2017 - 14:52:02 -> 09/22/2017 - 15:34:31

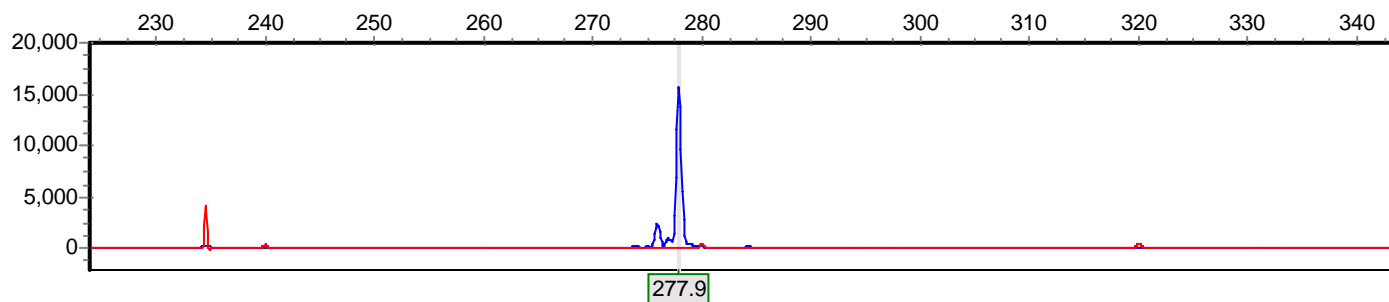

**Sample 30** 30\_F04.fsa Run date and time: 09/22/2017 - 14:52:02 -> 09/22/2017 - 15:34:31

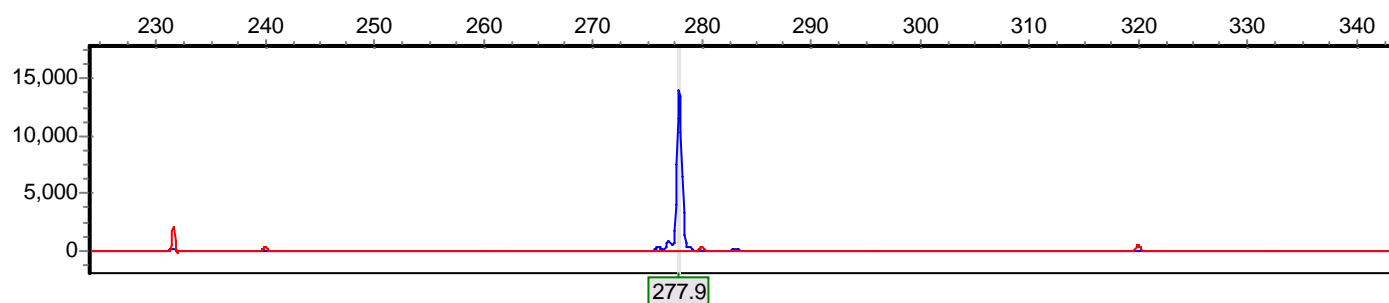

**Sample 31** 31\_G04.fsa Run date and time: 09/22/2017 - 14:52:02 -> 09/22/2017 - 15:34:31

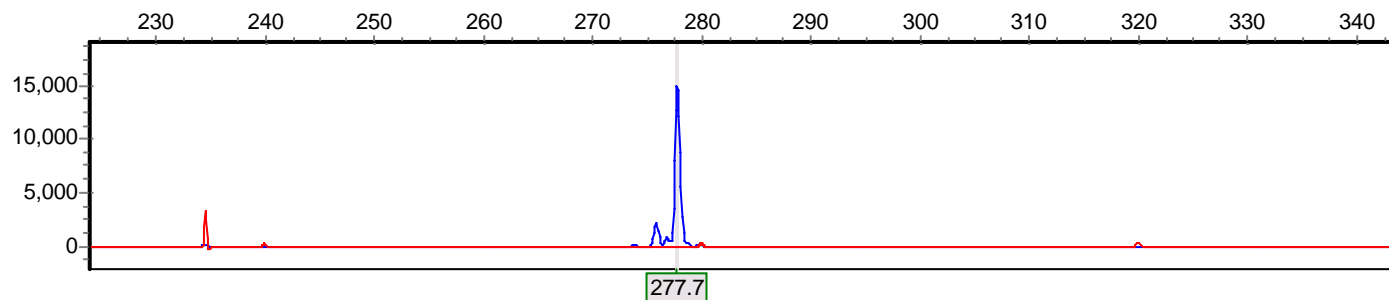

**Sample 32** 32\_H04.fsa Run date and time: 09/22/2017 - 14:52:02 -> 09/22/2017 - 15:34:31

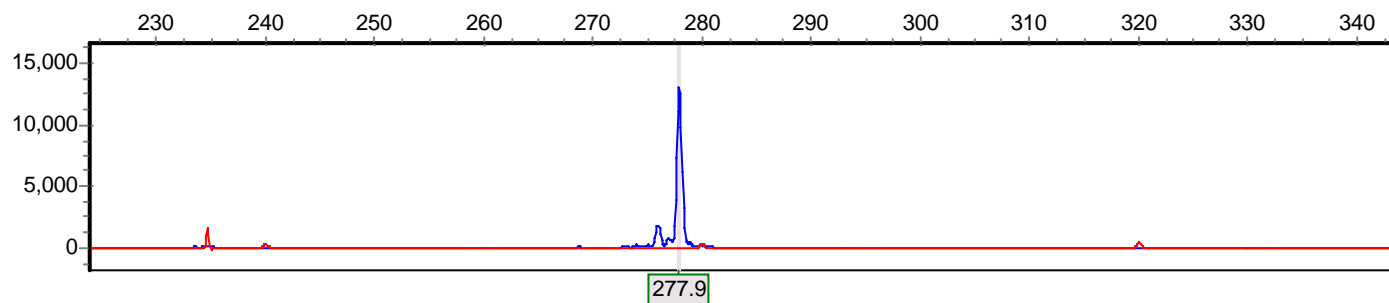



**Sample 33:** 33\_A05.fsa Run date and time: 09/22/2017 - 14:52:02 -> 09/22/2017 - 15:34:31

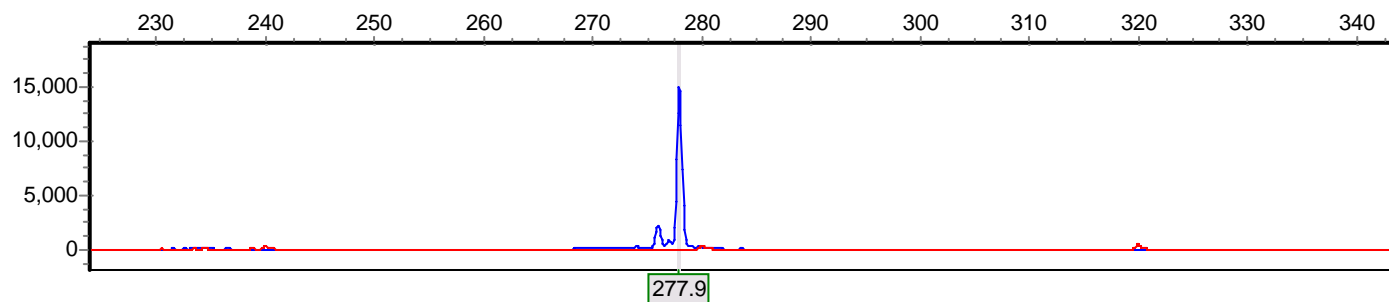

**Sample 34:** 34\_B05.fsa Run date and time: 09/22/2017 - 14:52:02 -> 09/22/2017 - 15:34:31

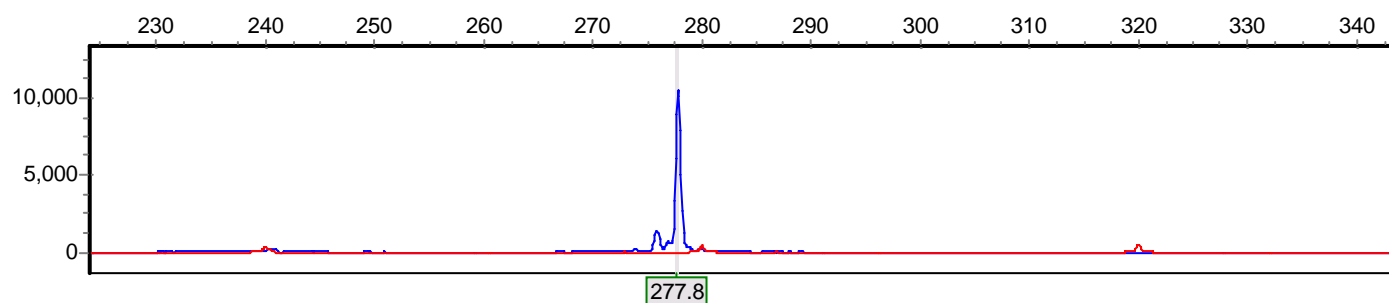

**Sample 35:** 35\_C05.fsa Run date and time: 09/22/2017 - 14:52:02 -> 09/22/2017 - 15:34:31

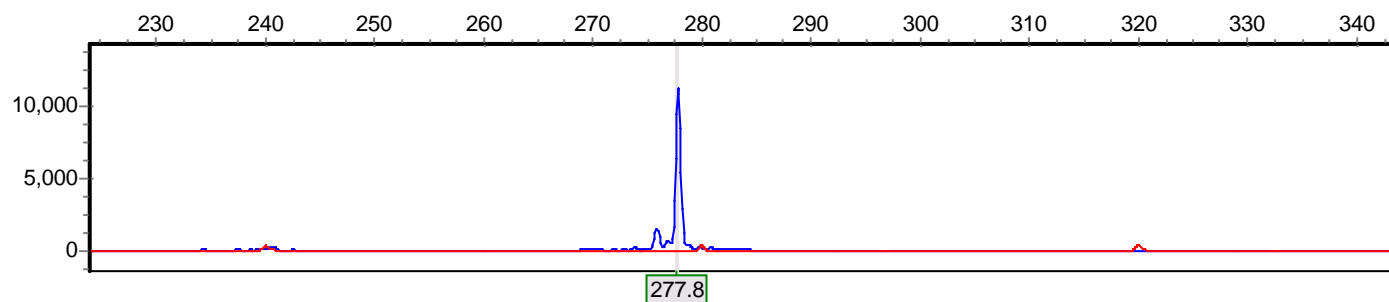

**Sample 36:** 36\_D05.fsa Run date and time: 09/22/2017 - 14:52:02 -> 09/22/2017 - 15:34:31

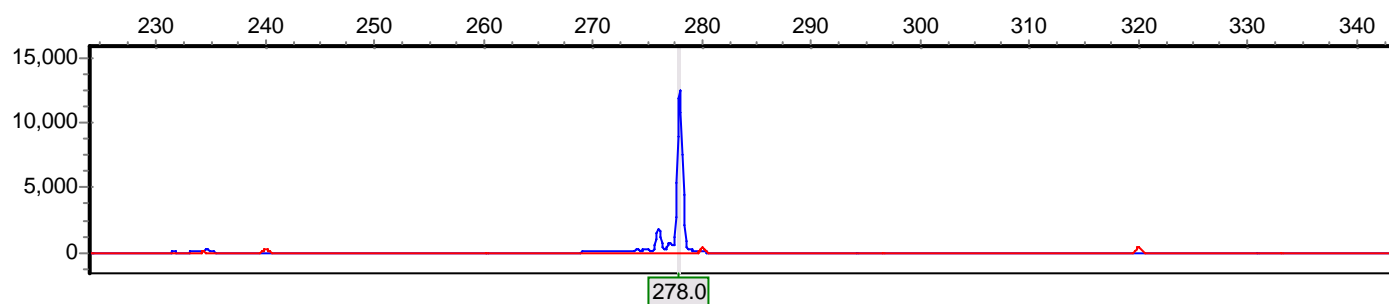

Sample 37: 37\_E05.fsa Run date and time: 09/22/2017 - 14:52:02 -> 09/22/2017 - 15:34:31

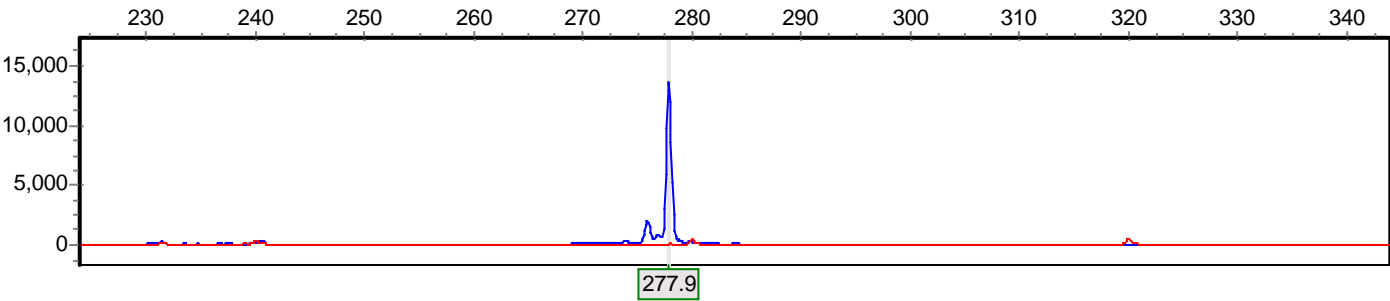

Sample 38 38\_F05.fsa Run date and time: 09/22/2017 - 14:52:02 -> 09/22/2017 - 15:34:31

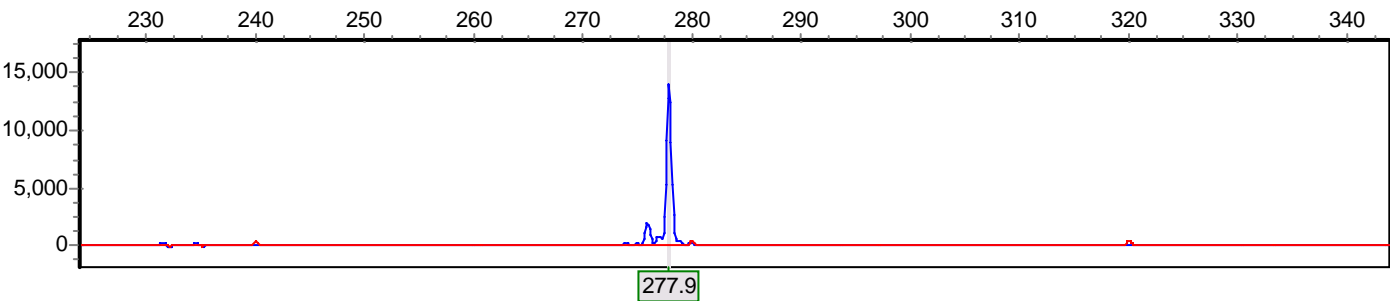

Sample 39 39\_G05.fsa Run date and time: 09/22/2017 - 14:52:02 -> 09/22/2017 - 15:34:31

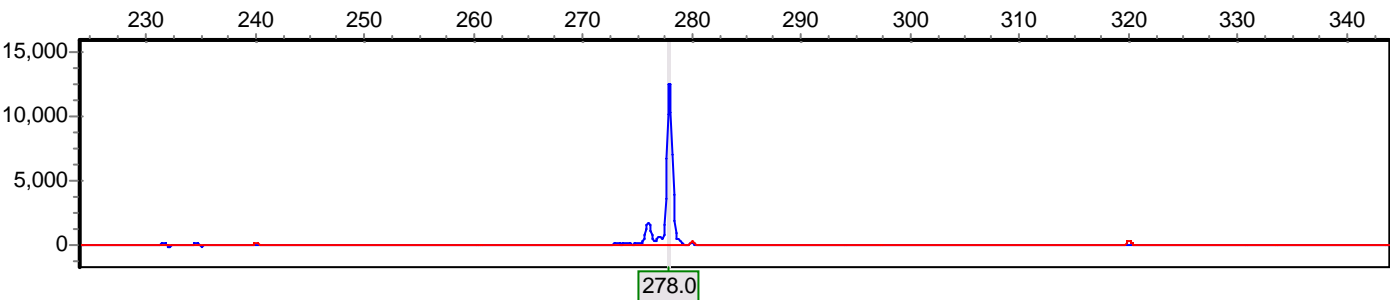

Sample 40 40\_H05.fsa Run date and time: 09/22/2017 - 14:52:02 -> 09/22/2017 - 15:34:31

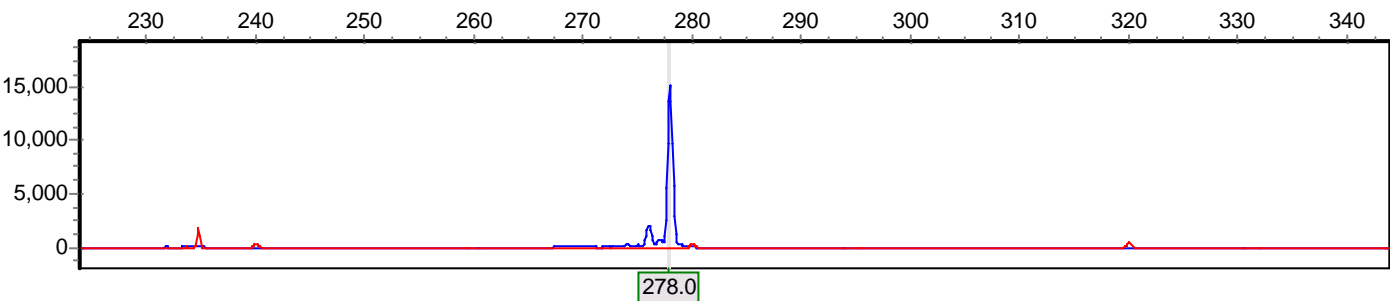

**Sample 41:** 41\_A06.fsa Run date and time: 09/22/2017 - 14:52:02 -> 09/22/2017 - 15:34:31

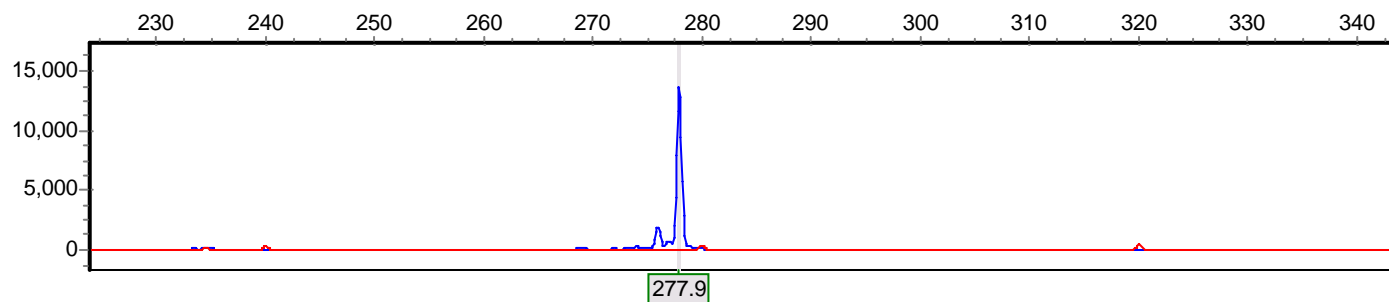

**Sample 42:** 42\_B06.fsa Run date and time: 09/22/2017 - 14:52:02 -> 09/22/2017 - 15:34:31

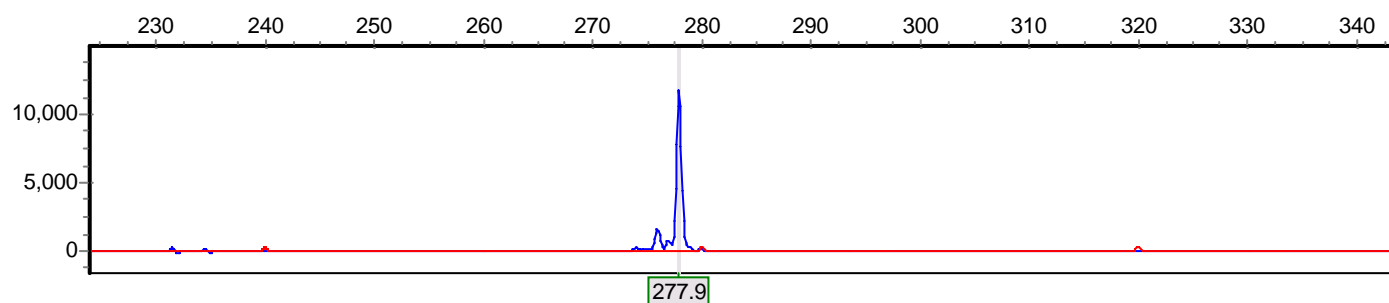

**Sample 43:** 43\_C06.fsa Run date and time: 09/22/2017 - 14:52:02 -> 09/22/2017 - 15:34:31

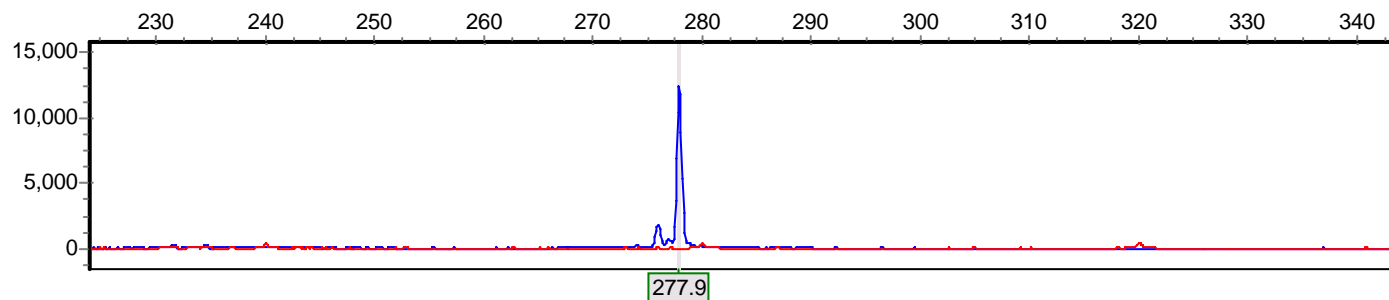

**Sample 44:** 44\_D06.fsa Run date and time: 09/22/2017 - 14:52:02 -> 09/22/2017 - 15:34:31

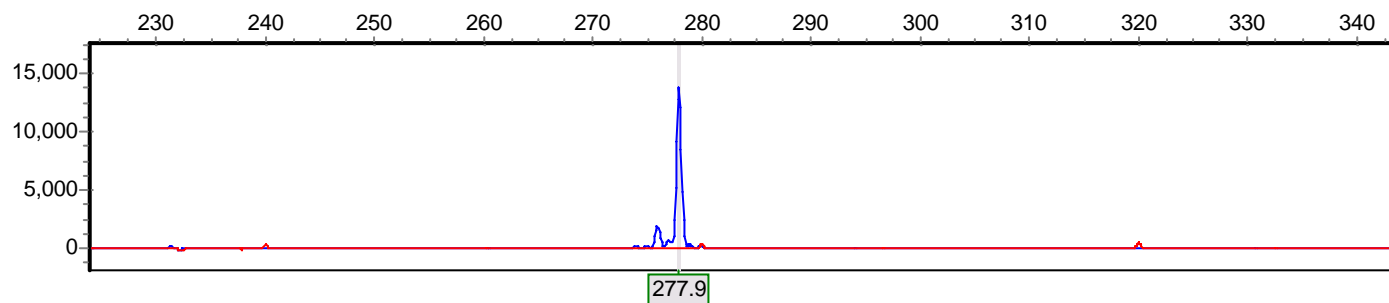

**Sample 45:** 45\_E06.fsa Run date and time: 09/22/2017 - 14:52:02 -> 09/22/2017 - 15:34:31

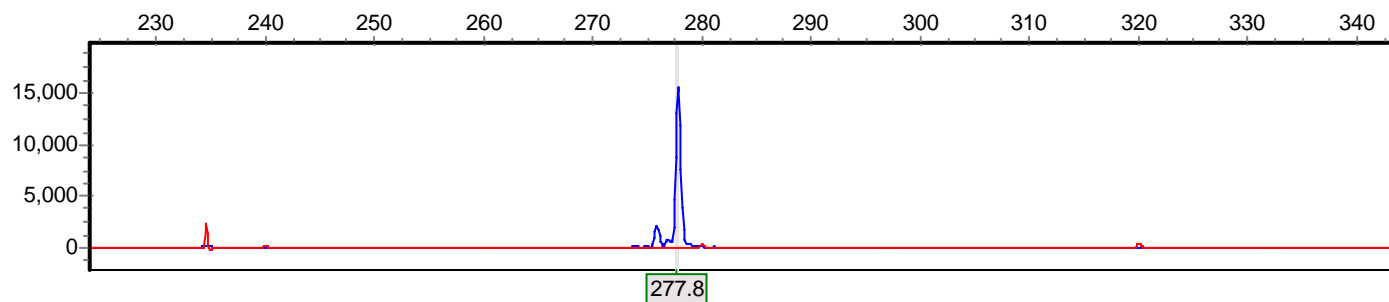

**Sample 46** 46\_F06.fsa Run date and time: 09/22/2017 - 14:52:02 -> 09/22/2017 - 15:34:31

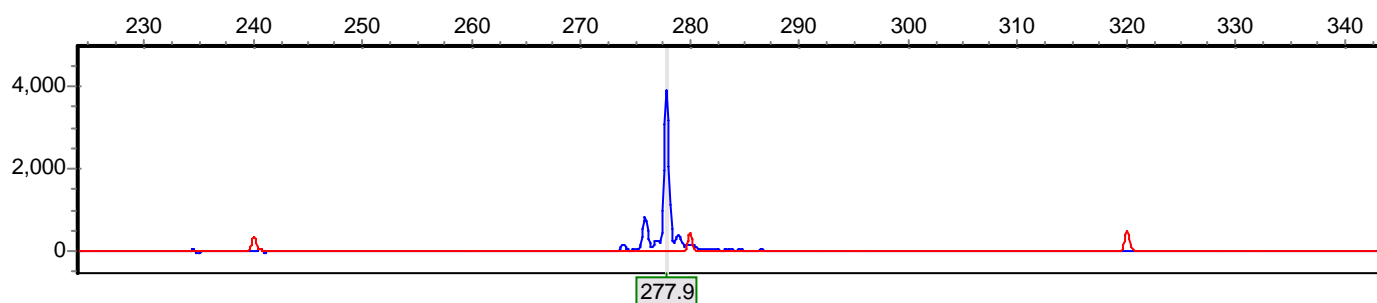

**Sample 47** 47\_G06.fsa Run date and time: 09/22/2017 - 14:52:02 -> 09/22/2017 - 15:34:31

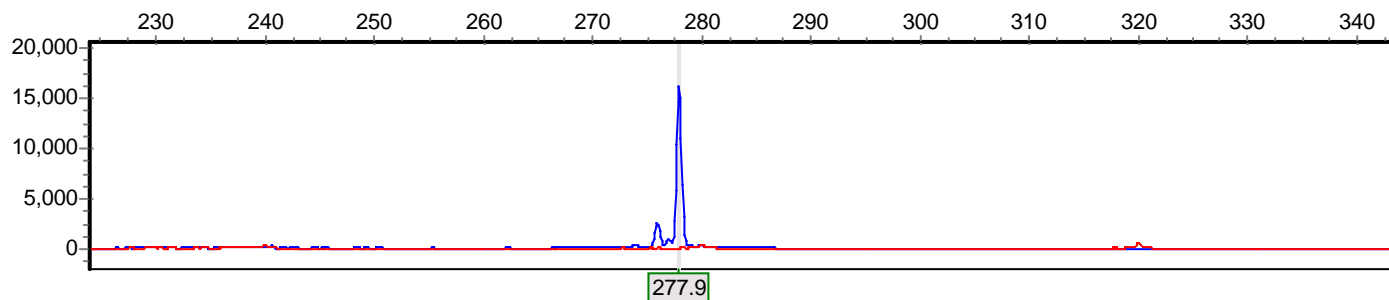

**Sample 48** 48\_H06.fsa Run date and time: 09/22/2017 - 14:52:02 -> 09/22/2017 - 15:34:31

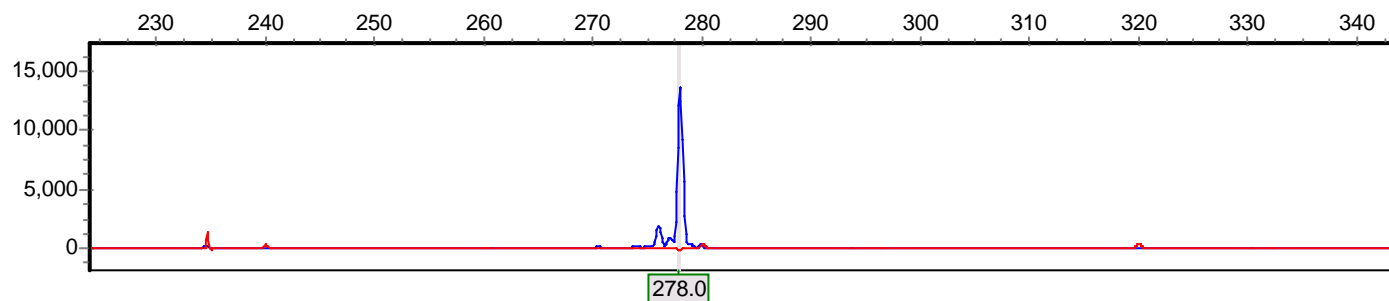

Sample 49: 49\_A07.fsa    Run date and time: 09/22/2017 - 14:52:02 -> 09/22/2017 - 15:34:31

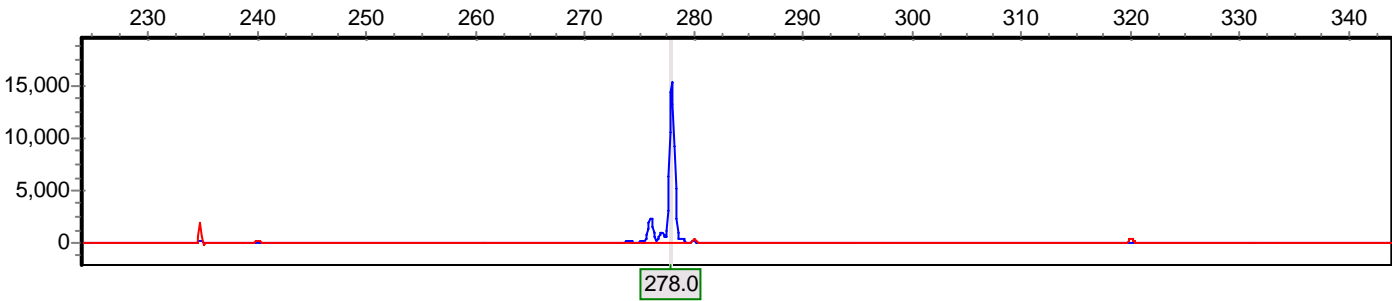

Sample 5050\_B07.fsa    Run date and time: 09/22/2017 - 14:52:02 -> 09/22/2017 - 15:34:31

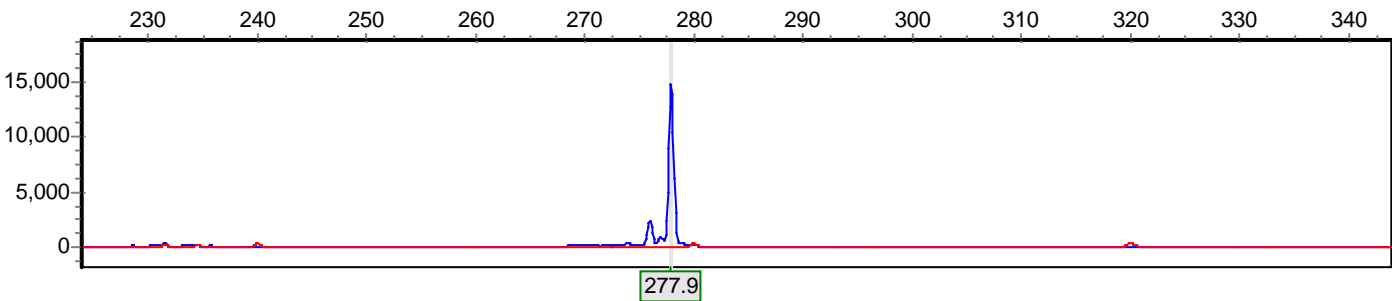

Sample 5151\_C07.fsa    Run date and time: 09/22/2017 - 14:52:02 -> 09/22/2017 - 15:34:31

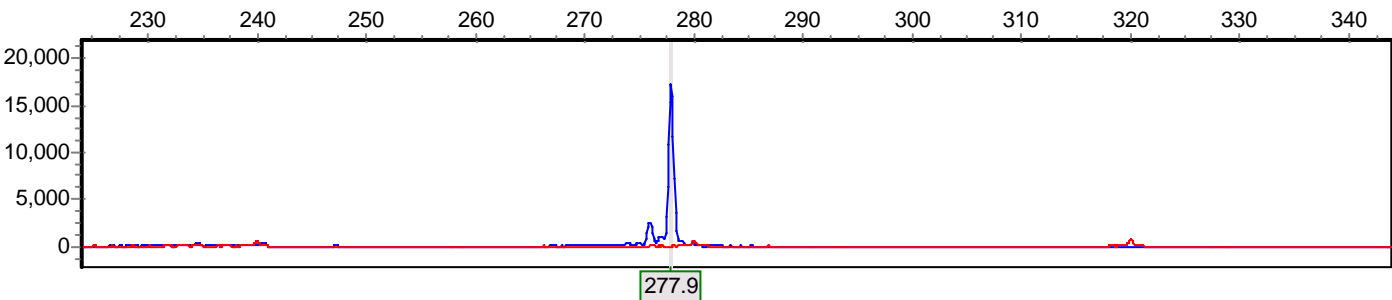

Sample 5252\_D07.fsa    Run date and time: 09/22/2017 - 14:52:02 -> 09/22/2017 - 15:34:31

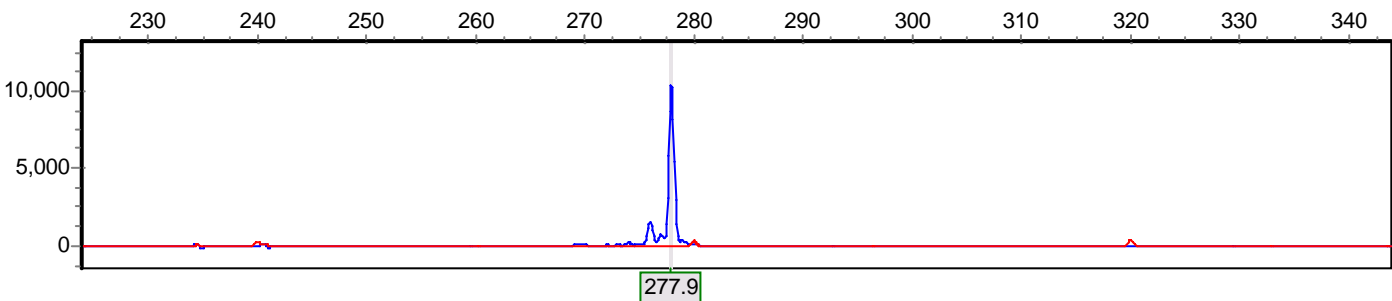

Sample 53: 53\_E07.fsa    Run date and time: 09/22/2017 - 14:52:02 -> 09/22/2017 - 15:34:31

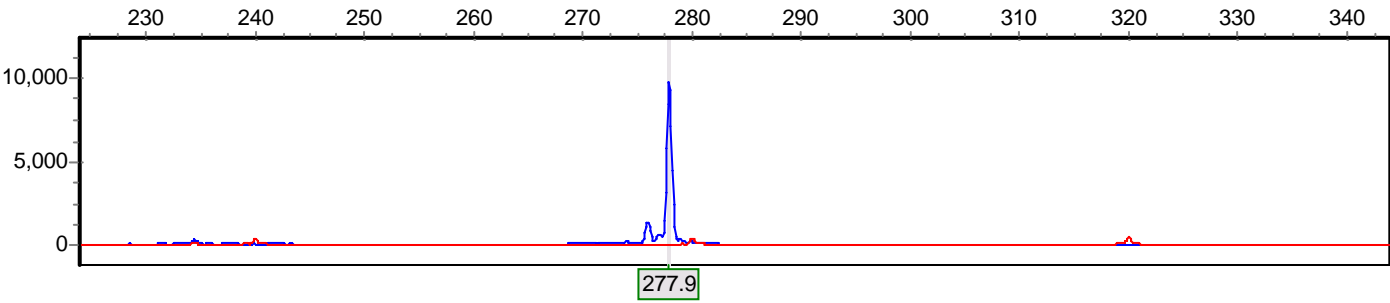

Supplement: s1 [file s1]
