# Supplementary material
Source: MDPI journal article supplement (https://www.mdpi.com/1999-4907/10/3/225)

**Sample 1:** 01\_A01.fsa Run date and time: 01/05/2017 - 10:23:59 -> 01/05/2017 - 11:07:48

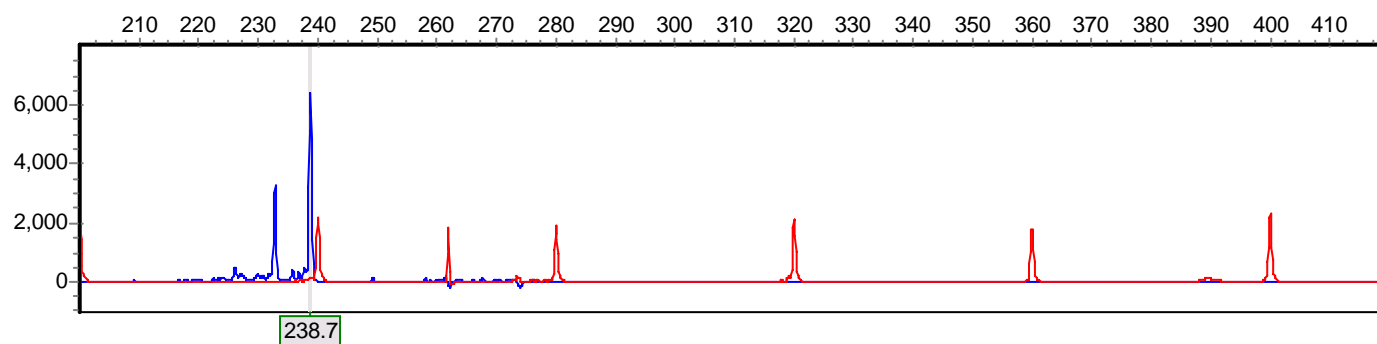

**Sample 2:** 02\_B01.fsa Run date and time: 01/05/2017 - 10:23:59 -> 01/05/2017 - 11:07:48

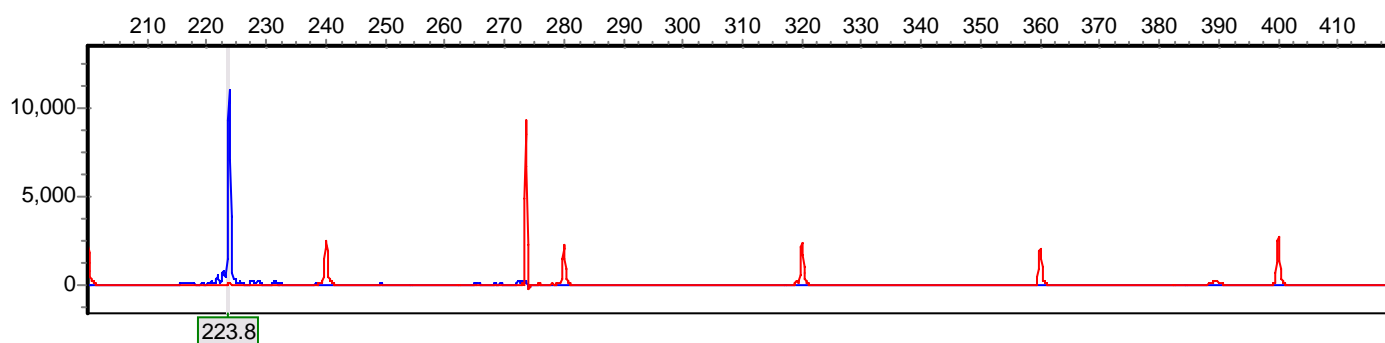

**Sample 3:** 03\_C01.fsa Run date and time: 01/05/2017 - 10:23:59 -> 01/05/2017 - 11:07:48

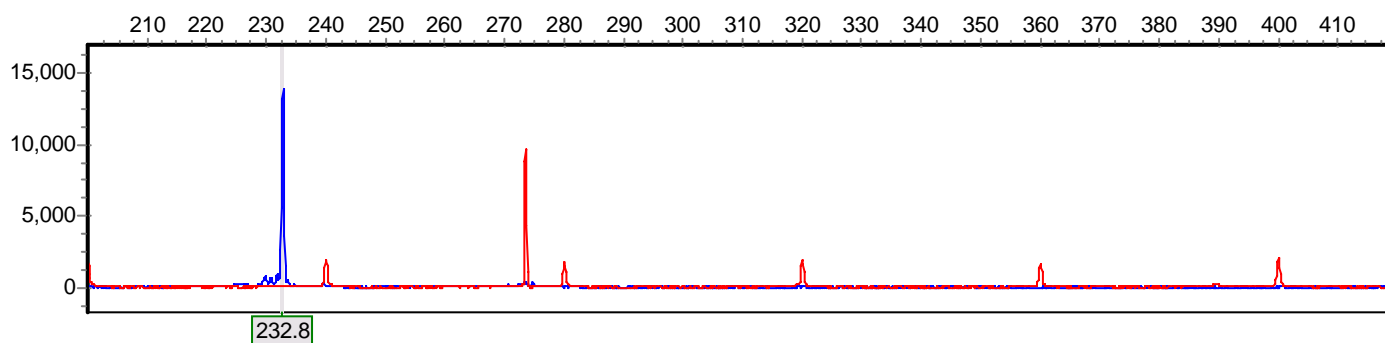

**Sample 4:** 04\_D01.fsa Run date and time: 01/05/2017 - 10:23:59 -> 01/05/2017 - 11:07:48

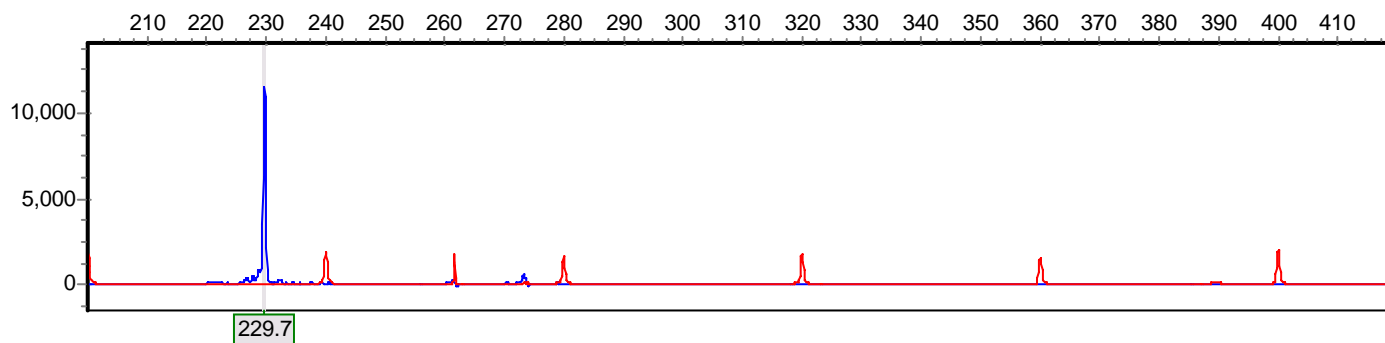

Sample 5: 05\_E01.fsa    Run date and time: 01/05/2017 - 10:23:59 -> 01/05/2017 - 11:07:48

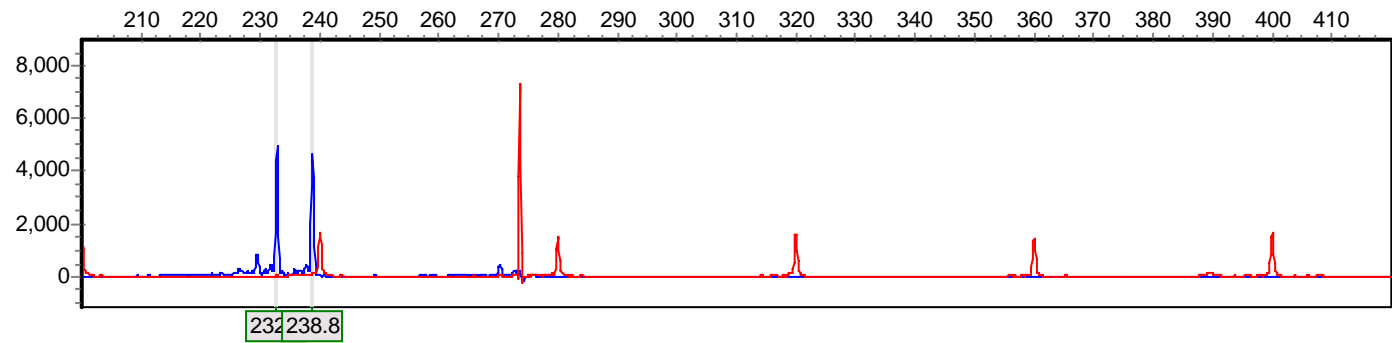

Sample 6: 06\_F01.fsa    Run date and time: 01/05/2017 - 10:23:59 -> 01/05/2017 - 11:07:48

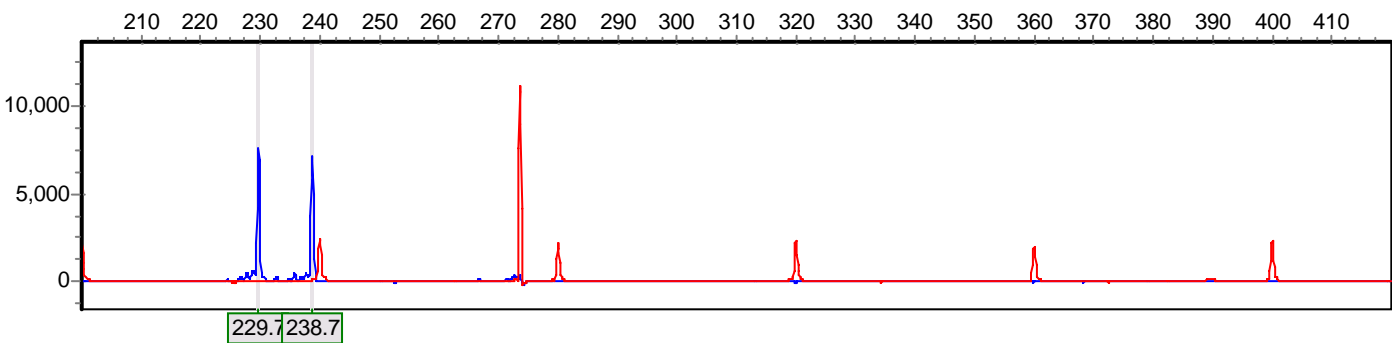

Sample 7: 07\_G01.fsa    Run date and time: 01/05/2017 - 10:23:59 -> 01/05/2017 - 11:07:48

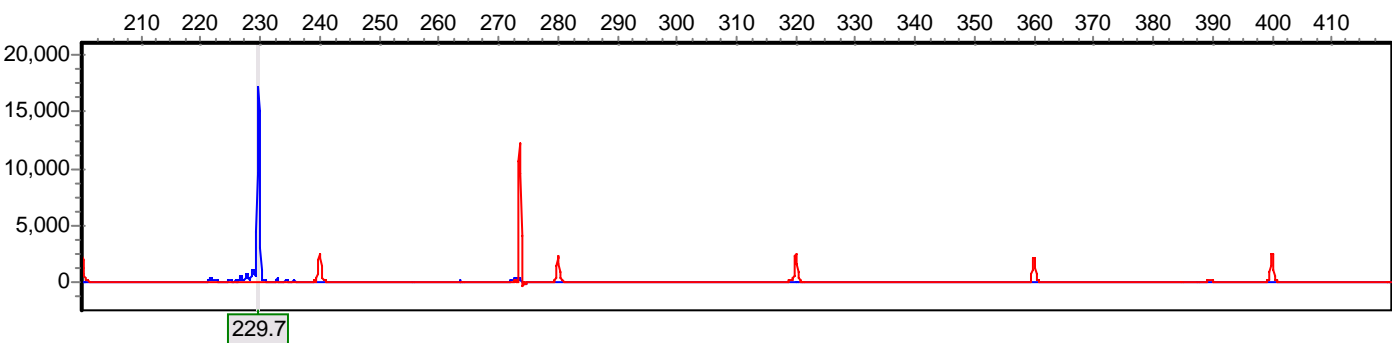

Sample 8: 08\_H01.fsa    Run date and time: 01/05/2017 - 10:23:59 -> 01/05/2017 - 11:07:48

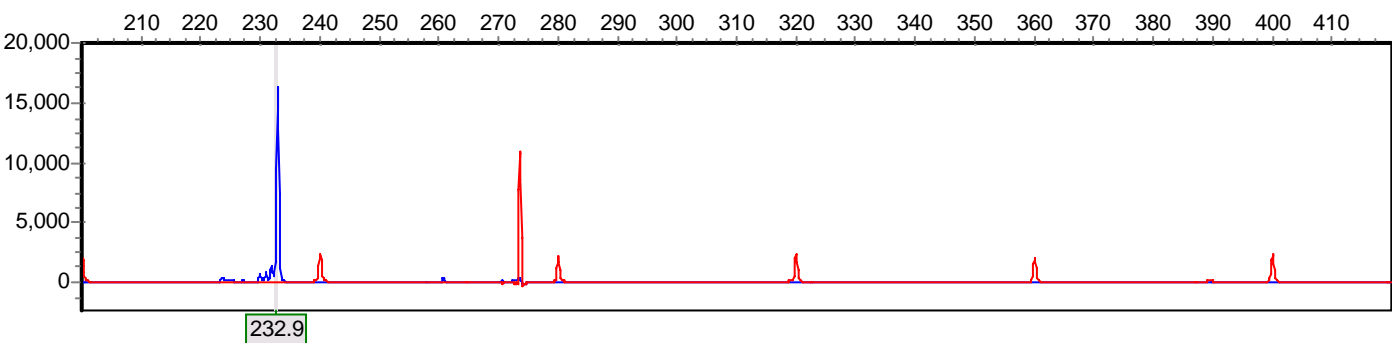

Sample 9: 09\_A02.fsa    Run date and time: 01/05/2017 - 10:23:59 -> 01/05/2017 - 11:07:48

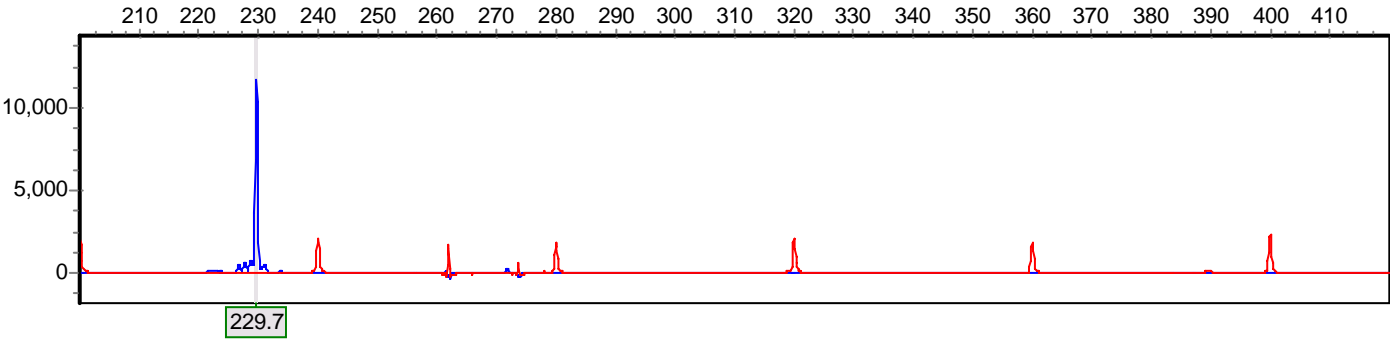

Sample 10 10\_B02.fsa    Run date and time: 01/05/2017 - 10:23:59 -> 01/05/2017 - 11:07:48

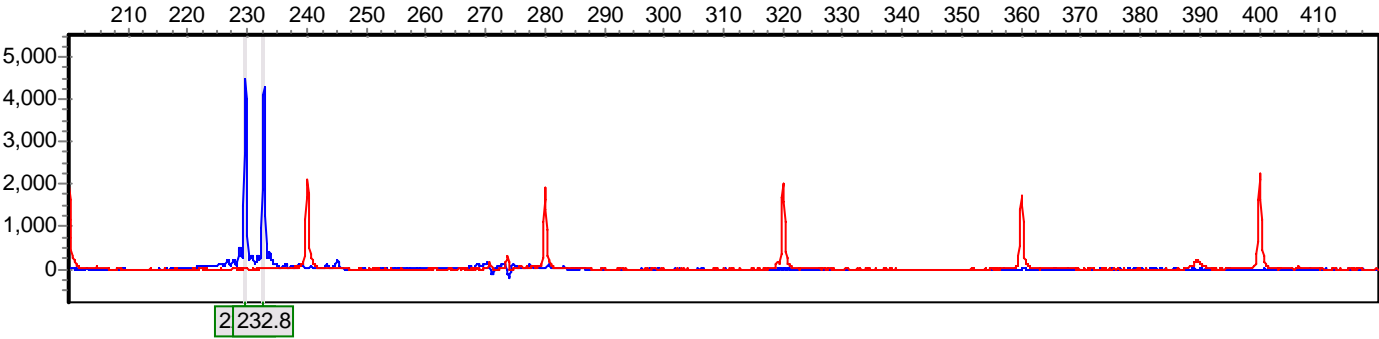

Sample 11 11\_C02.fsa    Run date and time: 01/05/2017 - 10:23:59 -> 01/05/2017 - 11:07:48

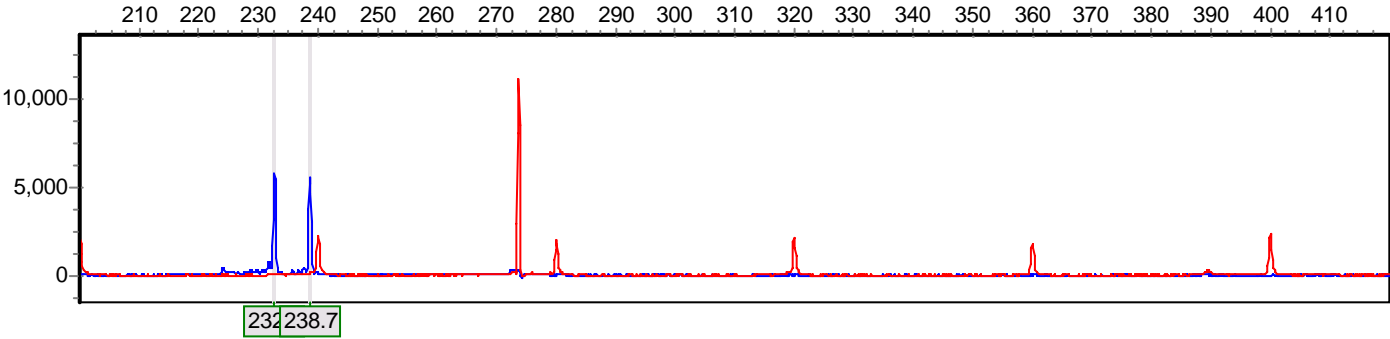

Sample 12 12\_D02.fsa    Run date and time: 01/05/2017 - 10:23:59 -> 01/05/2017 - 11:07:48

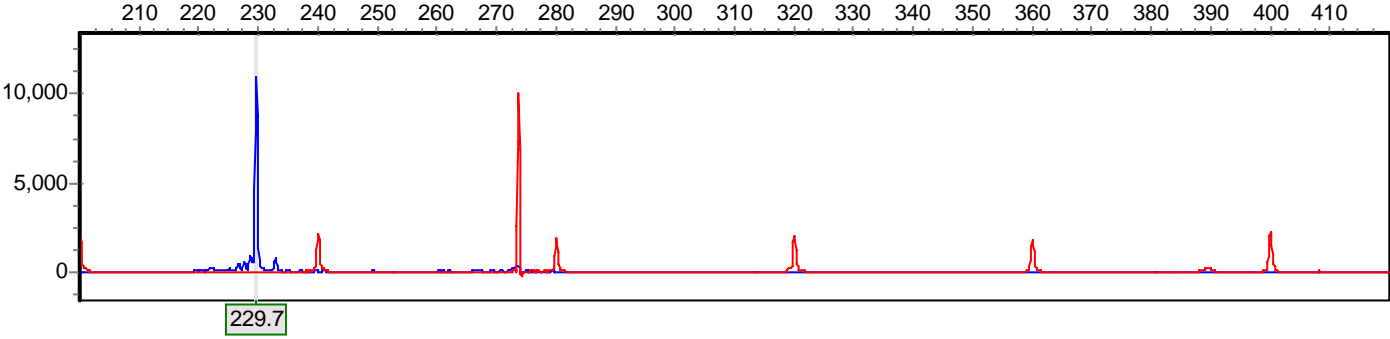

Sample 13: 13\_E02.fsa    Run date and time: 01/05/2017 - 10:23:59 -> 01/05/2017 - 11:07:48

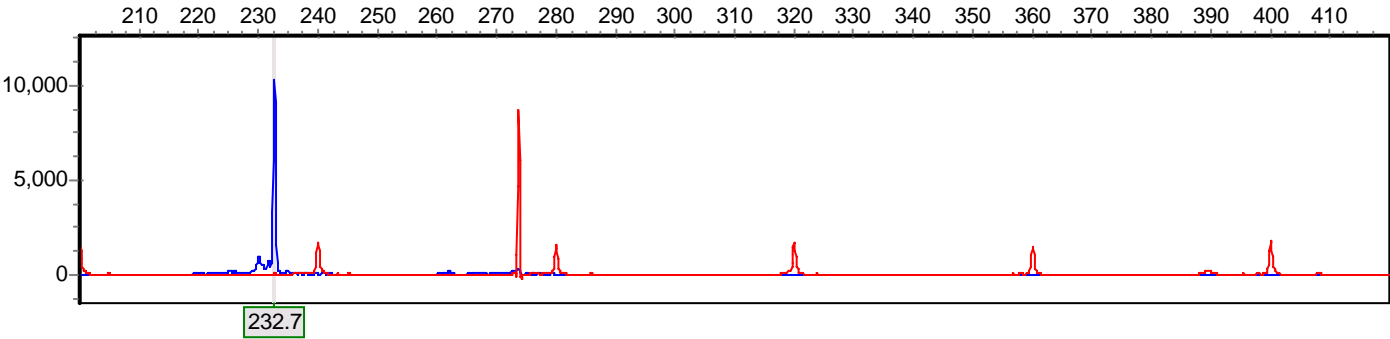

Sample 14: 14\_F02.fsa    Run date and time: 01/05/2017 - 10:23:59 -> 01/05/2017 - 11:07:48

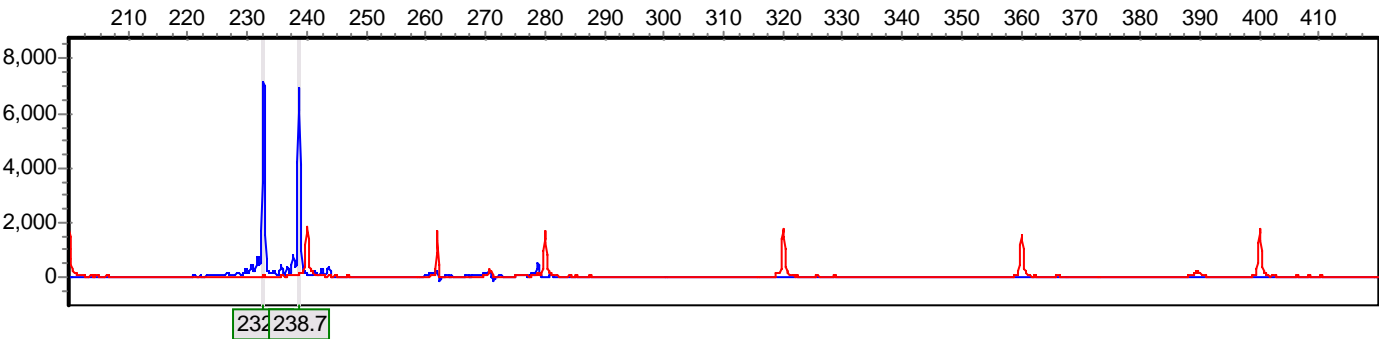

Sample 15: 15\_G02.fsa    Run date and time: 01/05/2017 - 10:23:59 -> 01/05/2017 - 11:07:48

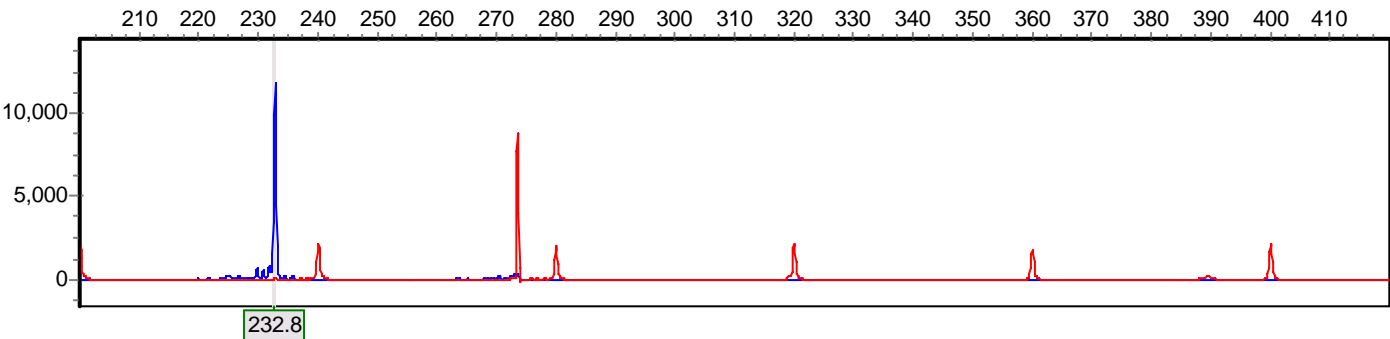

Sample 16: 16\_H02.fsa    Run date and time: 01/05/2017 - 10:23:59 -> 01/05/2017 - 11:07:48

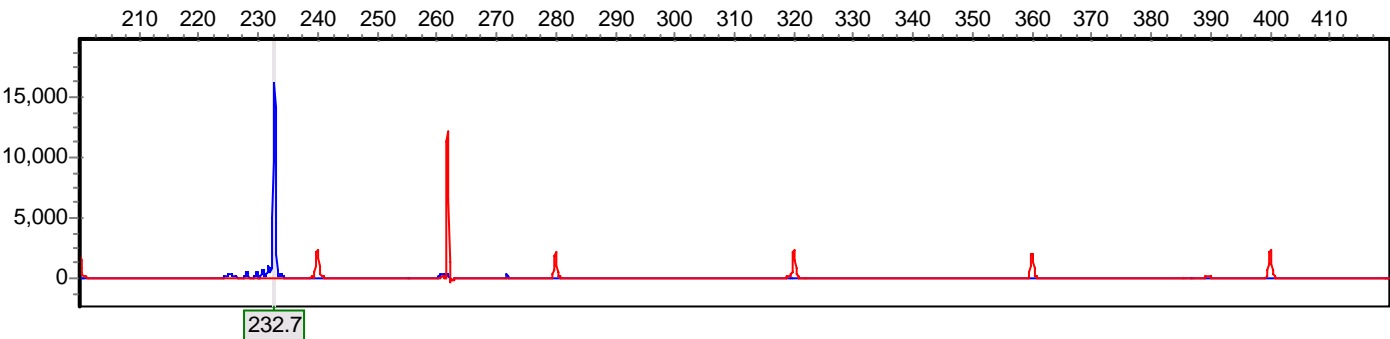

**Sample 17:** 17\_A03.fsa Run date and time: 01/05/2017 - 10:23:59 -> 01/05/2017 - 11:07:48

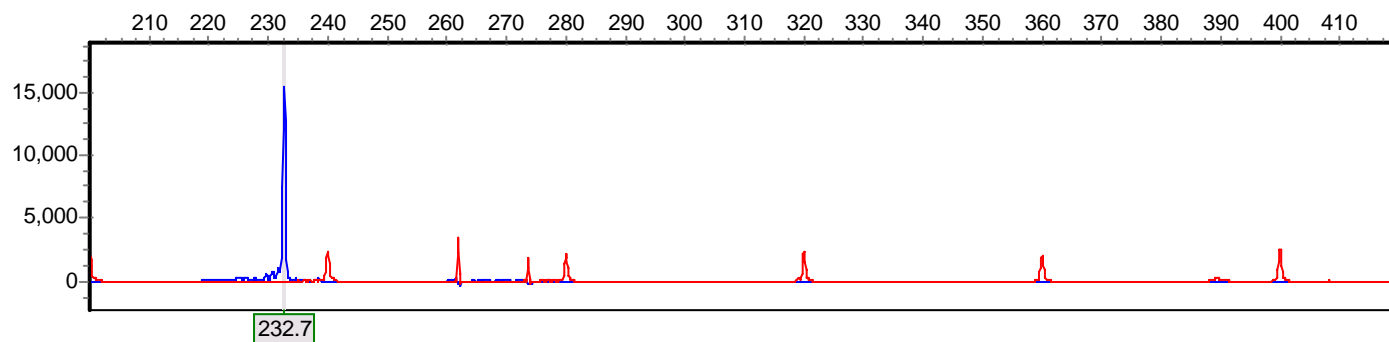

**Sample 18** 18\_B03.fsa Run date and time: 01/05/2017 - 10:23:59 -> 01/05/2017 - 11:07:48

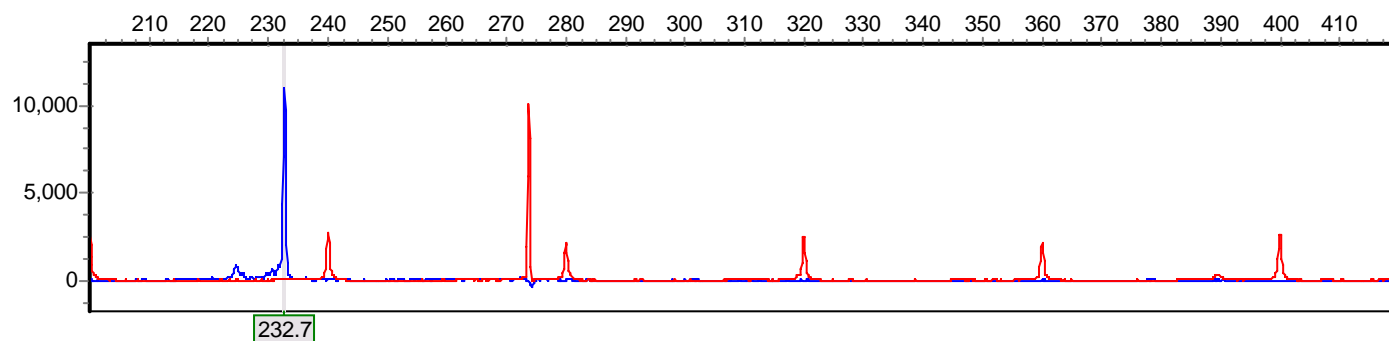

**Sample 19** 19\_C03.fsa Run date and time: 01/05/2017 - 10:23:59 -> 01/05/2017 - 11:07:48

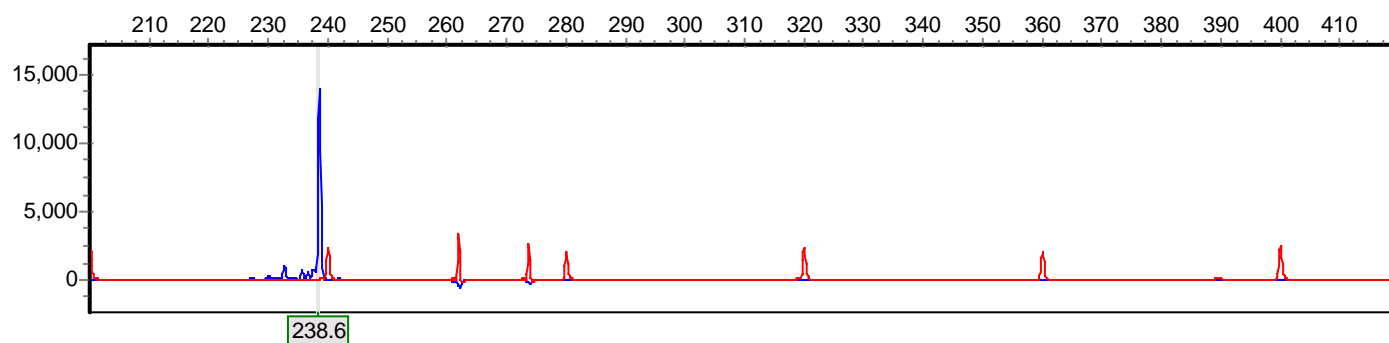

**Sample 20** 20\_D03.fsa Run date and time: 01/05/2017 - 10:23:59 -> 01/05/2017 - 11:07:48

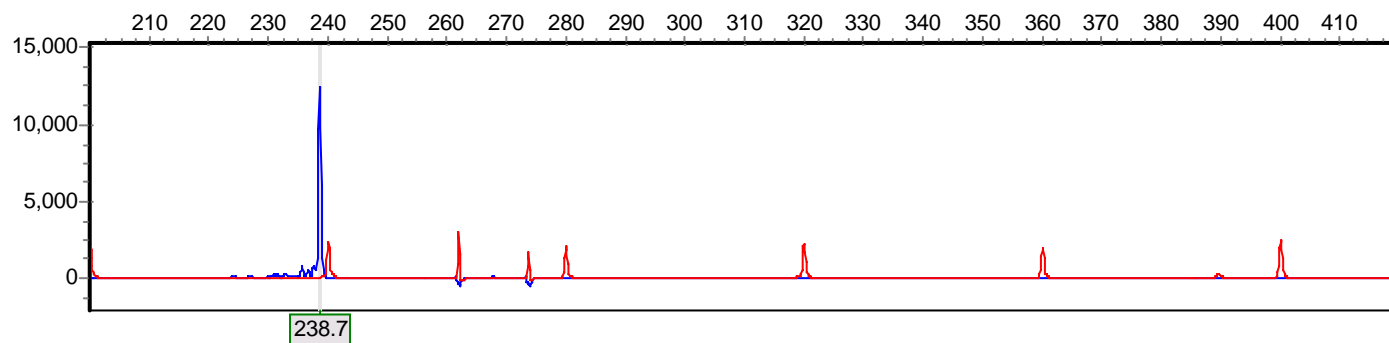

Sample 21: 21\_E03.fsa    Run date and time: 01/05/2017 - 10:23:59 -> 01/05/2017 - 11:07:48

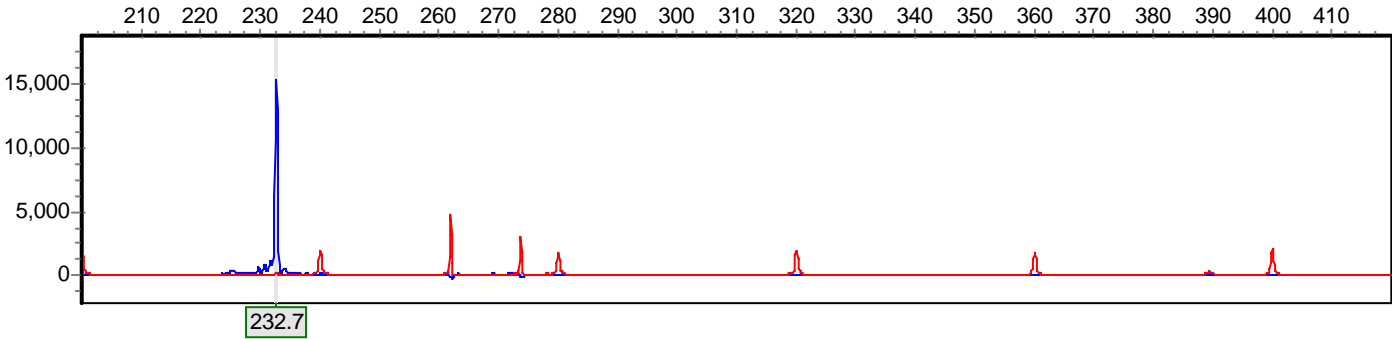

Sample 22: 222\_F03.fsa    Run date and time: 01/05/2017 - 10:23:59 -> 01/05/2017 - 11:07:48

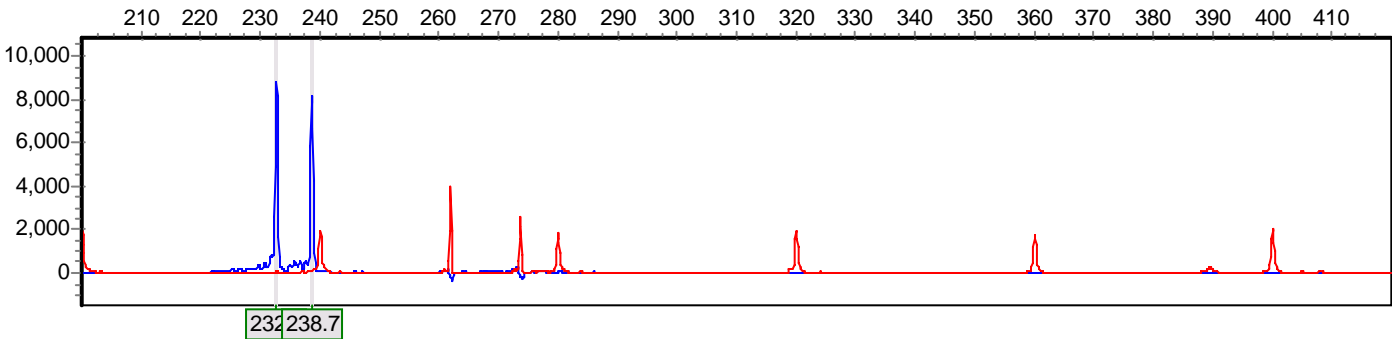

Sample 23: 23\_G03.fsa    Run date and time: 01/05/2017 - 10:23:59 -> 01/05/2017 - 11:07:48

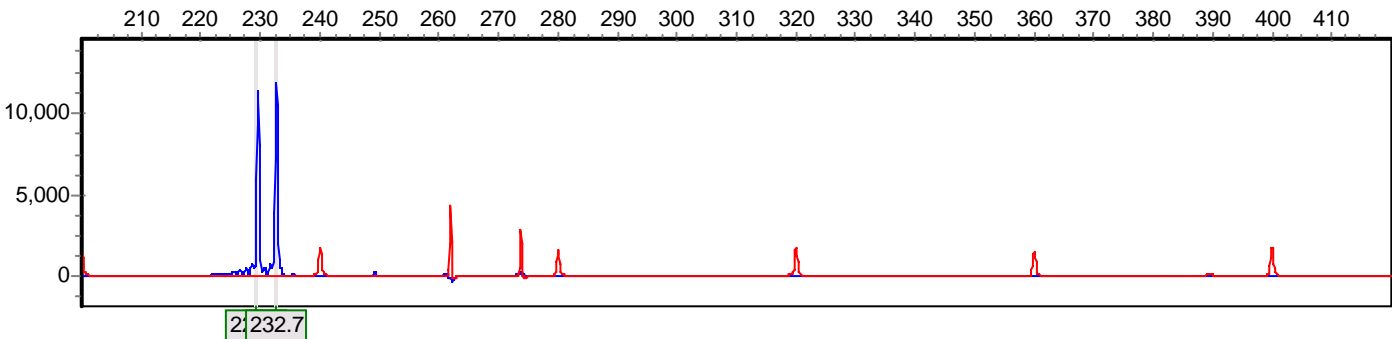

Sample 24: 24\_H03.fsa    Run date and time: 01/05/2017 - 10:23:59 -> 01/05/2017 - 11:07:48

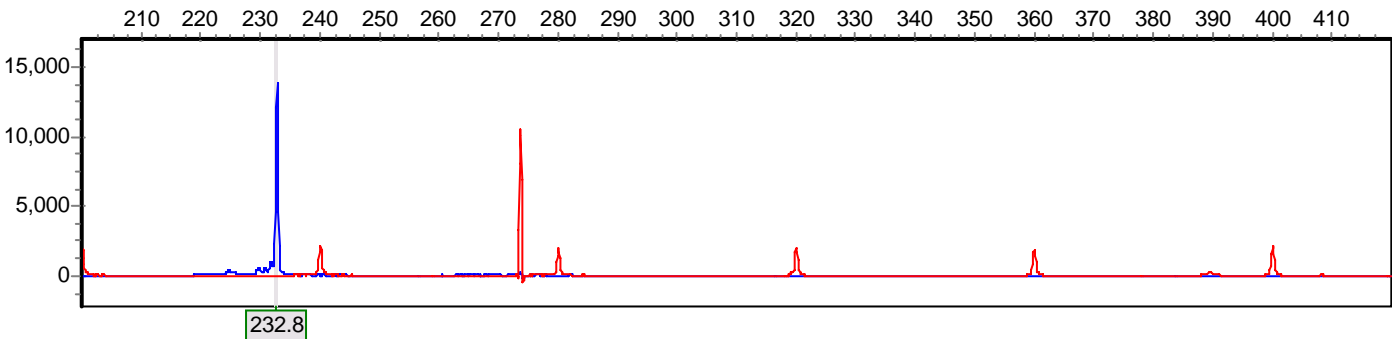

Sample 25: 25\_A04.fsa    Run date and time: 01/05/2017 - 10:23:59 -> 01/05/2017 - 11:07:48

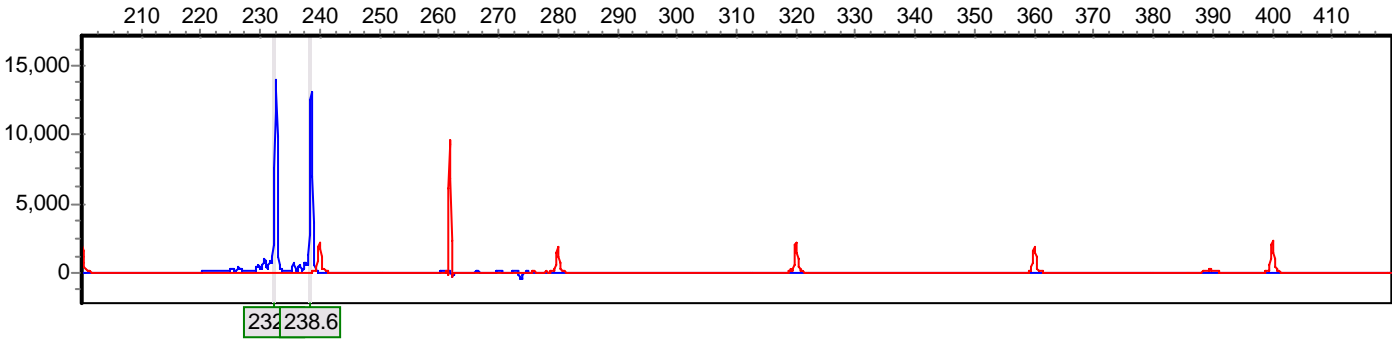

Sample 26: 26\_B04.fsa    Run date and time: 01/05/2017 - 10:23:59 -> 01/05/2017 - 11:07:48

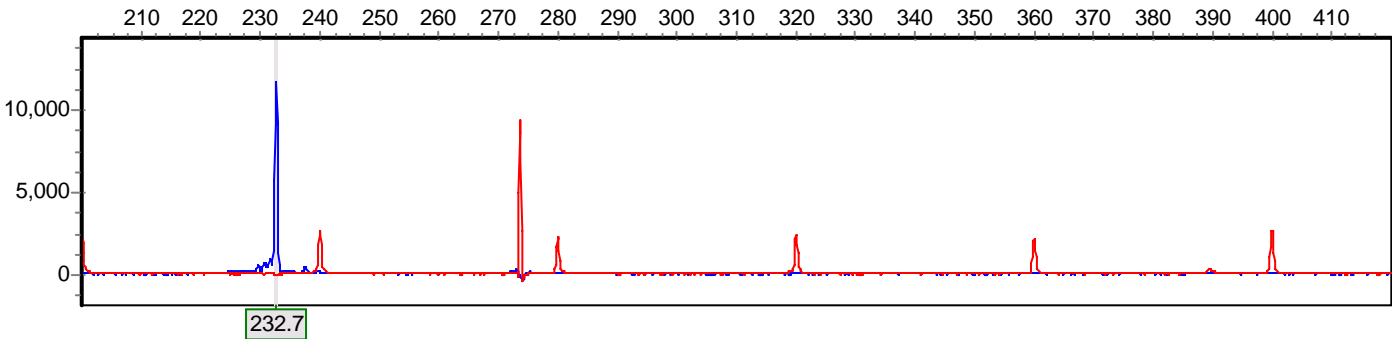

Sample 27: 27\_C04.fsa    Run date and time: 01/05/2017 - 10:23:59 -> 01/05/2017 - 11:07:48

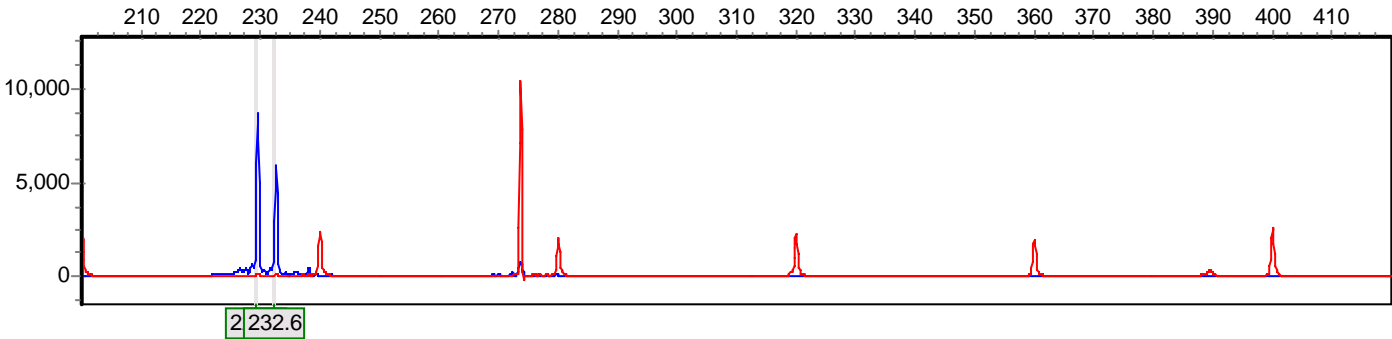

Sample 28: 28\_D04.fsa    Run date and time: 01/05/2017 - 10:23:59 -> 01/05/2017 - 11:07:48

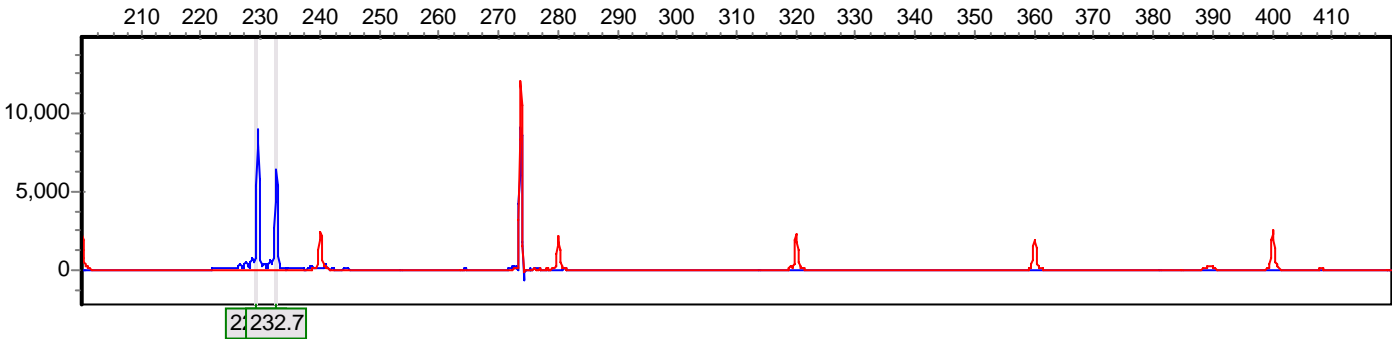

Sample 29: 29\_E04.fsa    Run date and time: 01/05/2017 - 10:23:59 -> 01/05/2017 - 11:07:48

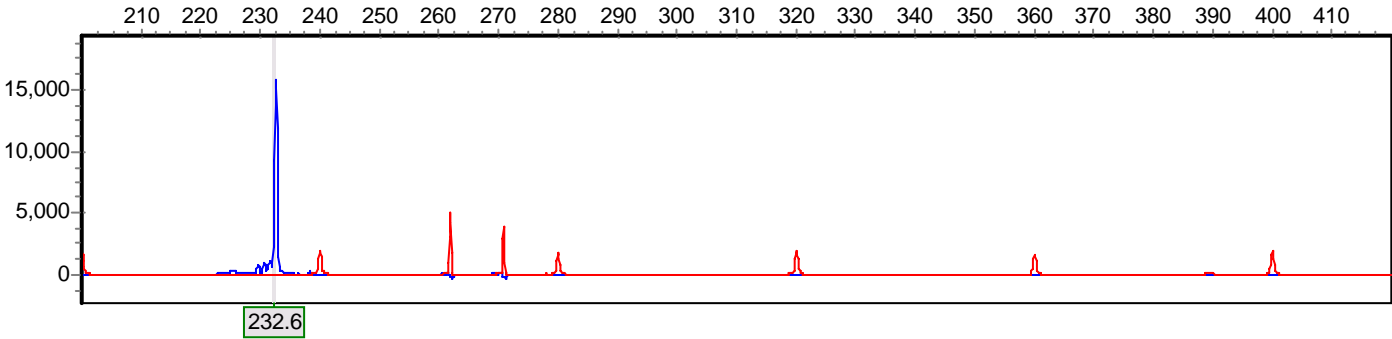

Sample 30: 30\_F04.fsa    Run date and time: 01/05/2017 - 10:23:59 -> 01/05/2017 - 11:07:48

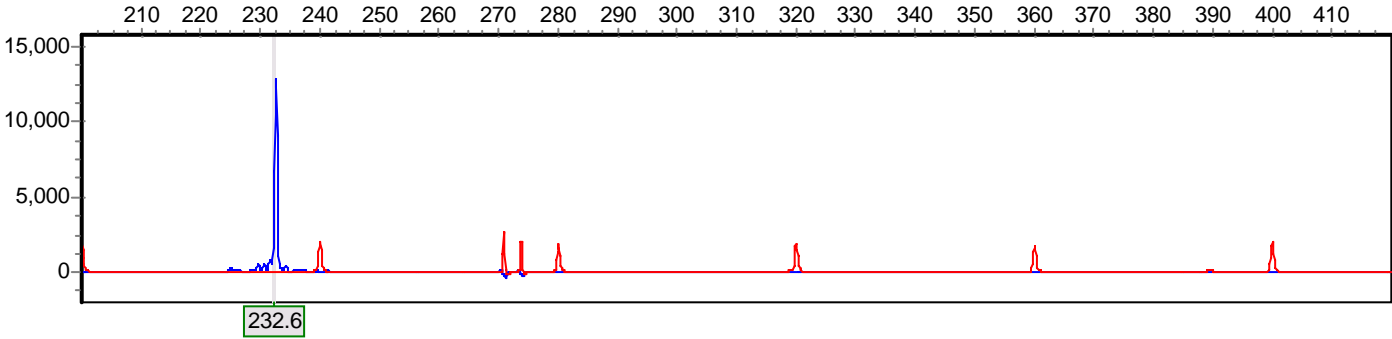

Sample 31: 31\_G04.fsa    Run date and time: 01/05/2017 - 10:23:59 -> 01/05/2017 - 11:07:48

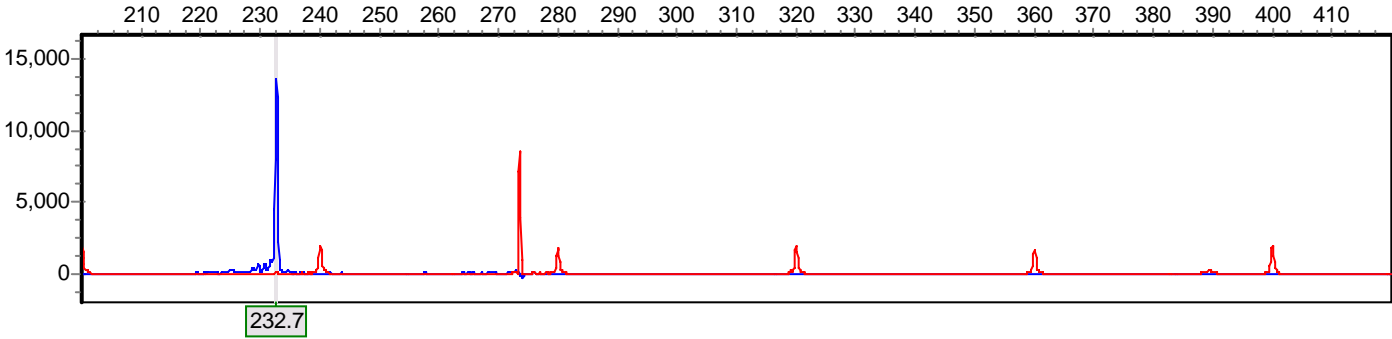

Sample 32: 32\_H04.fsa    Run date and time: 01/05/2017 - 10:23:59 -> 01/05/2017 - 11:07:48

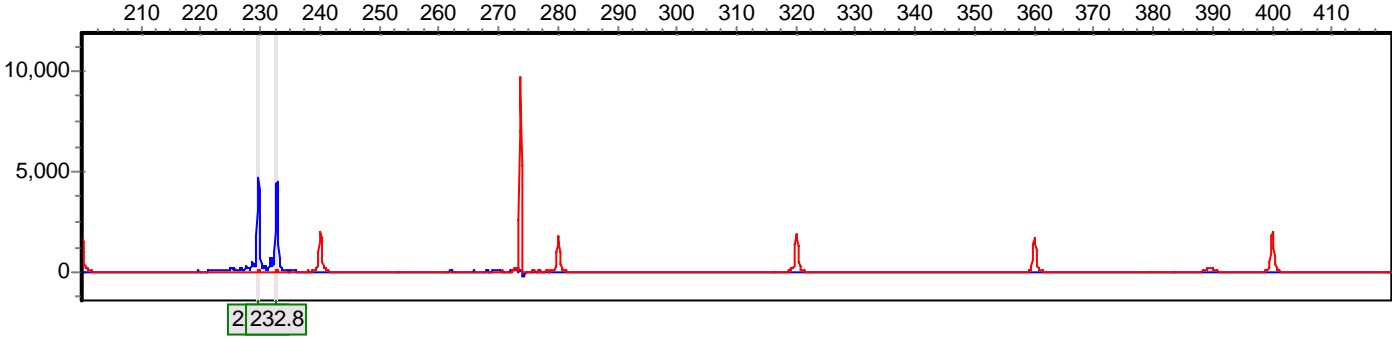



**Sample 33:** 33\_A05.fsa Run date and time: 01/05/2017 - 10:23:59 -> 01/05/2017 - 11:07:48

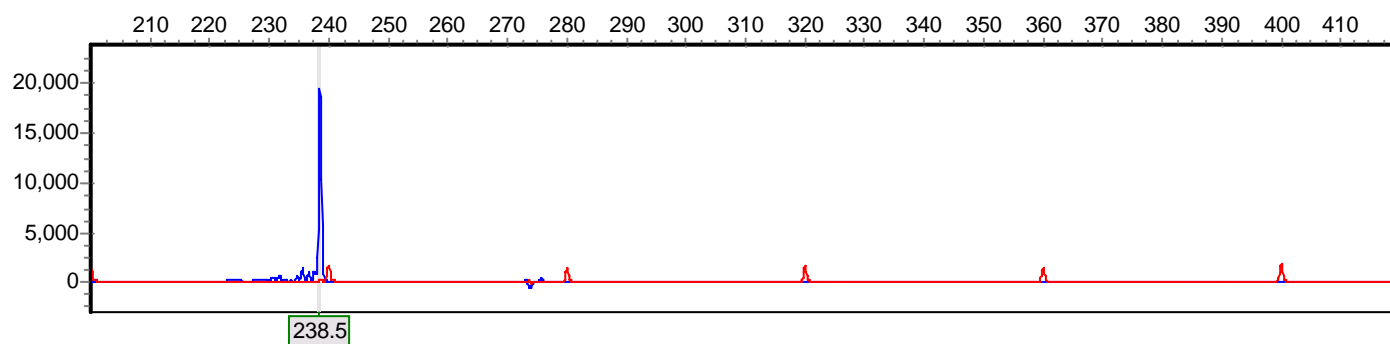

**Sample 34:** 34\_B05.fsa Run date and time: 01/05/2017 - 10:23:59 -> 01/05/2017 - 11:07:48

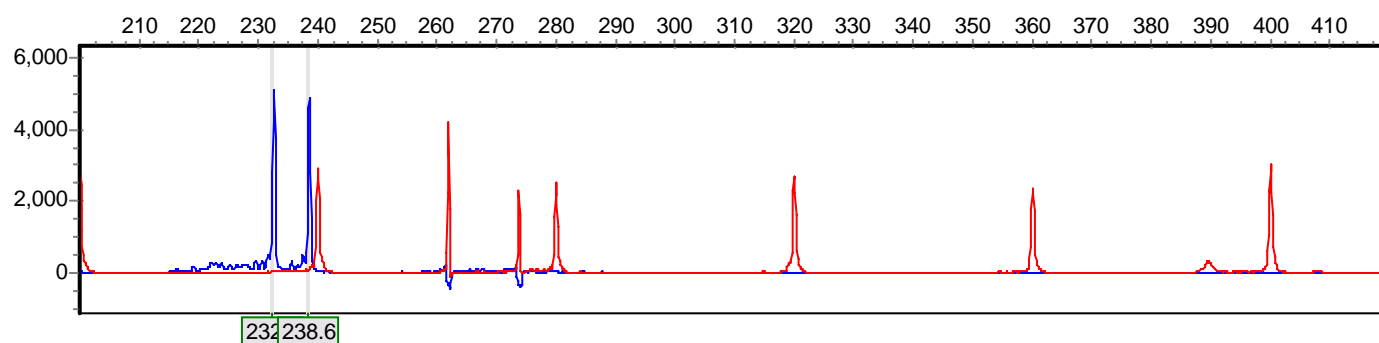

**Sample 35:** 35\_C05.fsa Run date and time: 01/05/2017 - 10:23:59 -> 01/05/2017 - 11:07:48

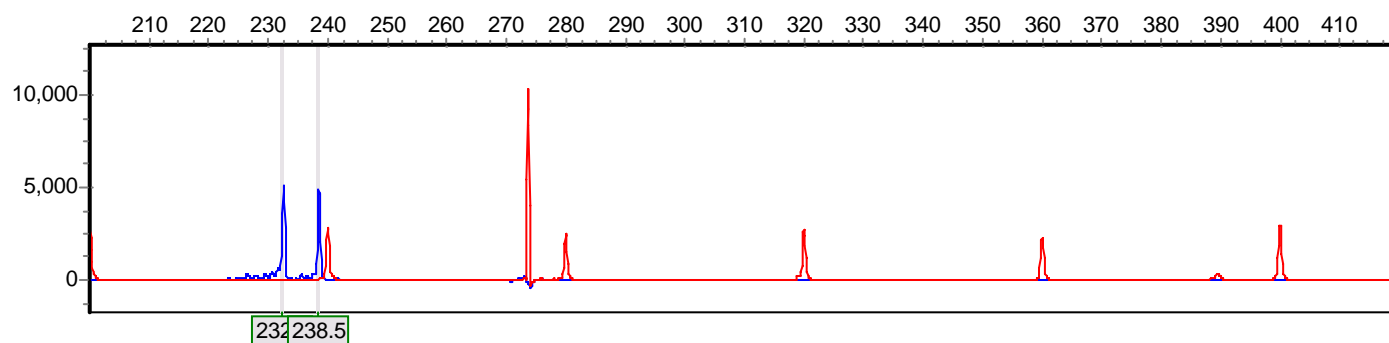

**Sample 36:** 36\_D05.fsa Run date and time: 01/05/2017 - 10:23:59 -> 01/05/2017 - 11:07:48

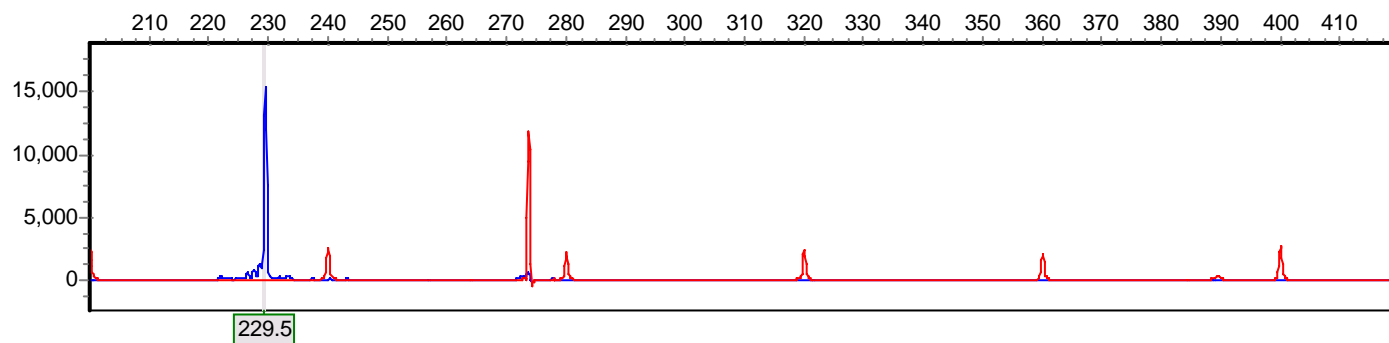

Sample 37: 37\_E05.fsa    Run date and time: 01/05/2017 - 10:23:59 -> 01/05/2017 - 11:07:48

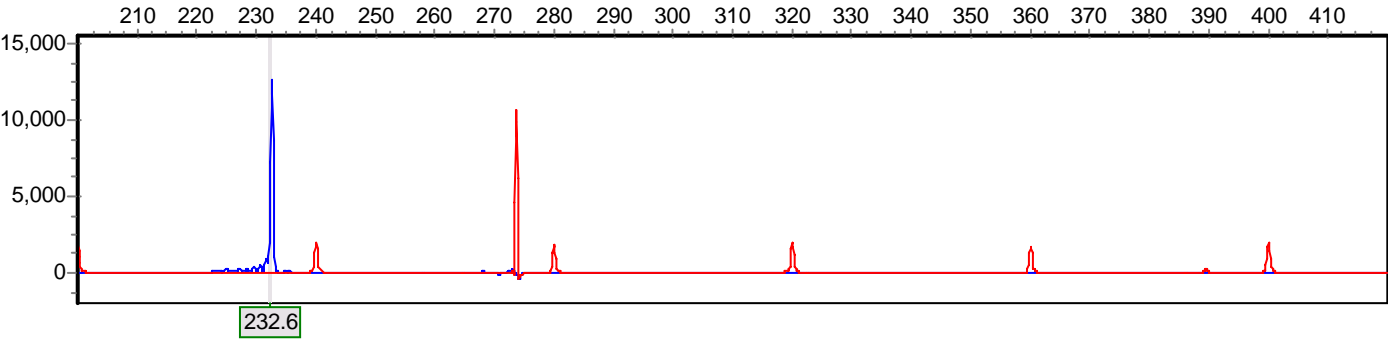

Sample 38 38\_F05.fsa    Run date and time: 01/05/2017 - 10:23:59 -> 01/05/2017 - 11:07:48

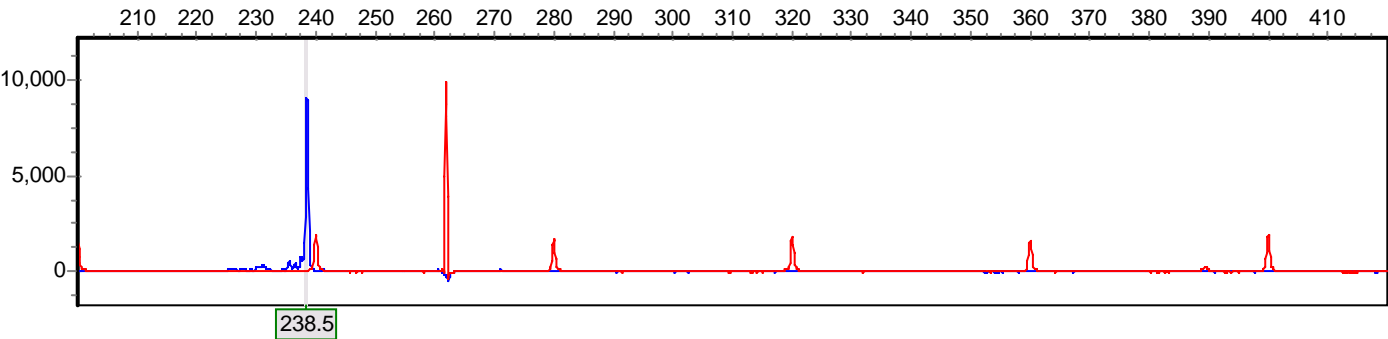

Sample 39 39\_G05.fsa    Run date and time: 01/05/2017 - 10:23:59 -> 01/05/2017 - 11:07:48

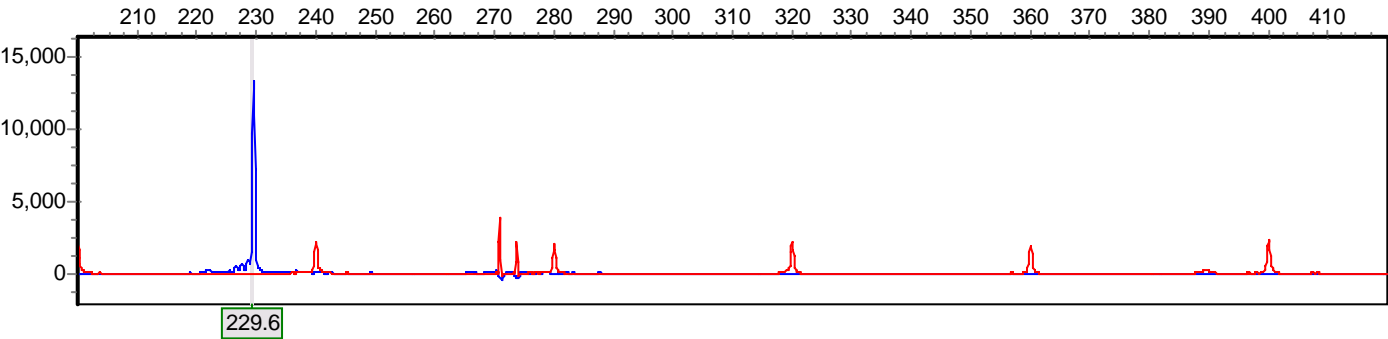

Sample 40 40\_H05.fsa    Run date and time: 01/05/2017 - 10:23:59 -> 01/05/2017 - 11:07:48

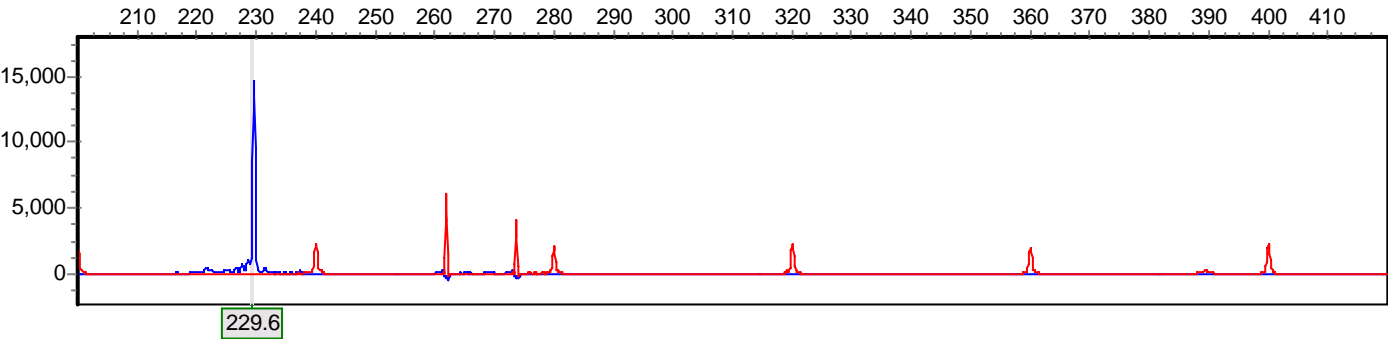

**Sample 41:** 41\_A06.fsa Run date and time: 01/05/2017 - 10:23:59 -> 01/05/2017 - 11:07:48

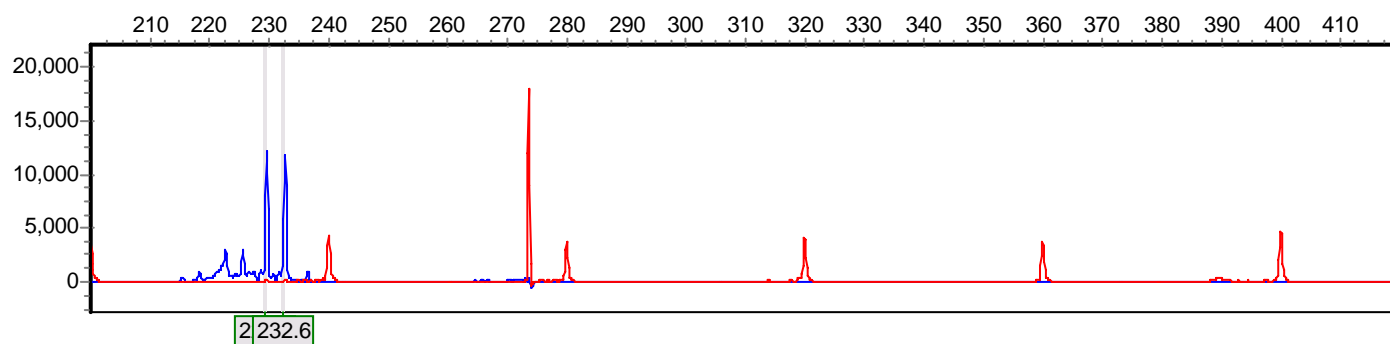

**Sample 42:** 42\_B06.fsa Run date and time: 01/05/2017 - 10:23:59 -> 01/05/2017 - 11:07:48

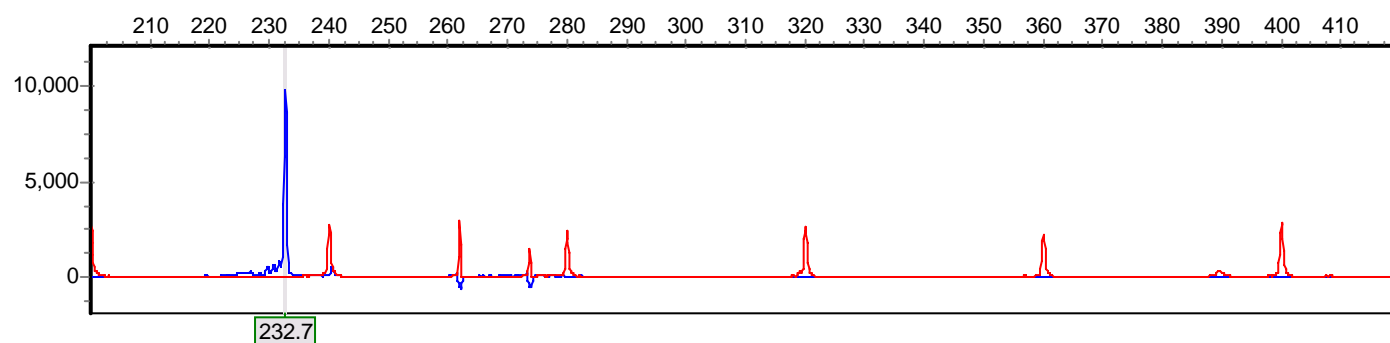

**Sample 43:** 43\_C06.fsa Run date and time: 01/05/2017 - 10:23:59 -> 01/05/2017 - 11:07:48

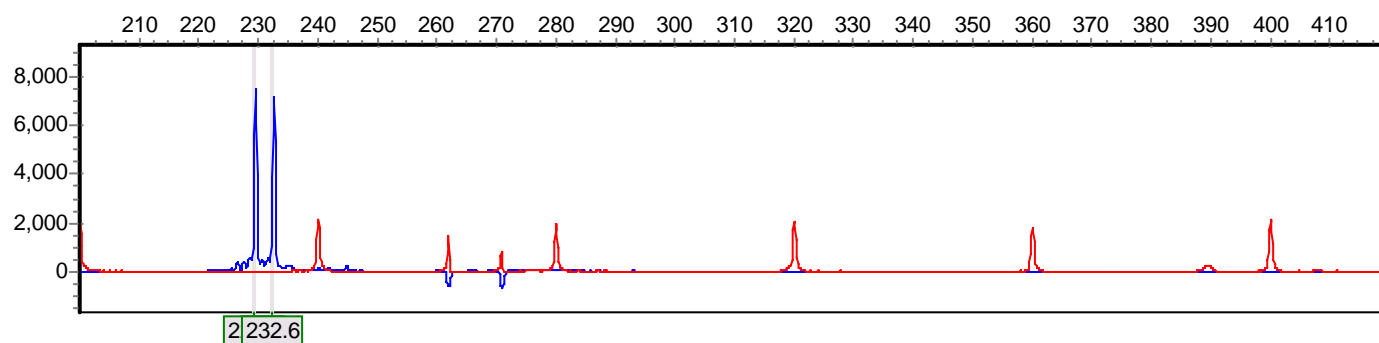

**Sample 44:** 44\_D06.fsa Run date and time: 01/05/2017 - 10:23:59 -> 01/05/2017 - 11:07:48

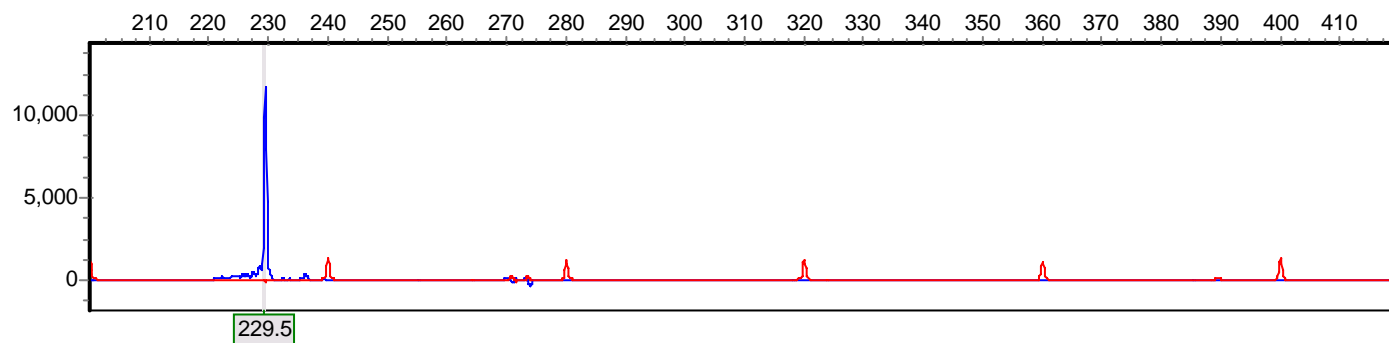

Sample 45: 45\_E06.fsa    Run date and time: 01/05/2017 - 10:23:59 -> 01/05/2017 - 11:07:48

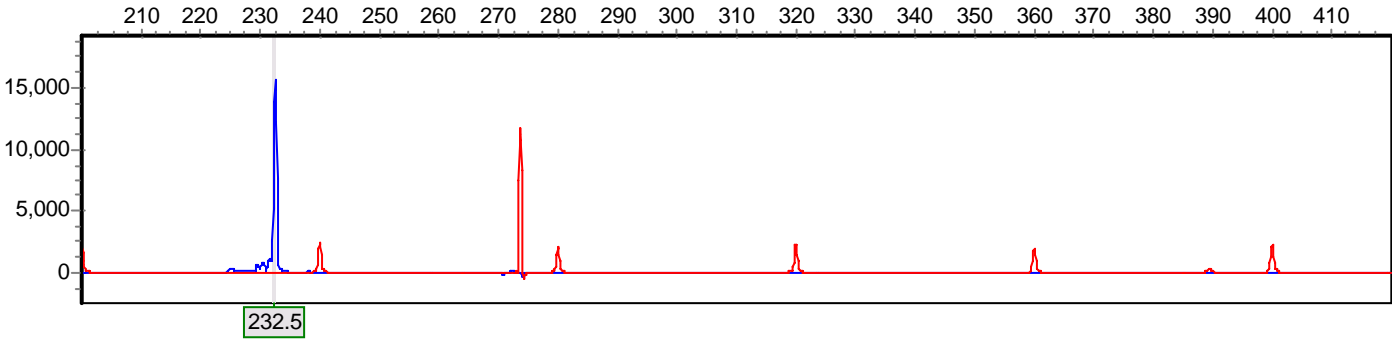

Sample 46: 46\_F06.fsa    Run date and time: 01/05/2017 - 10:23:59 -> 01/05/2017 - 11:07:48

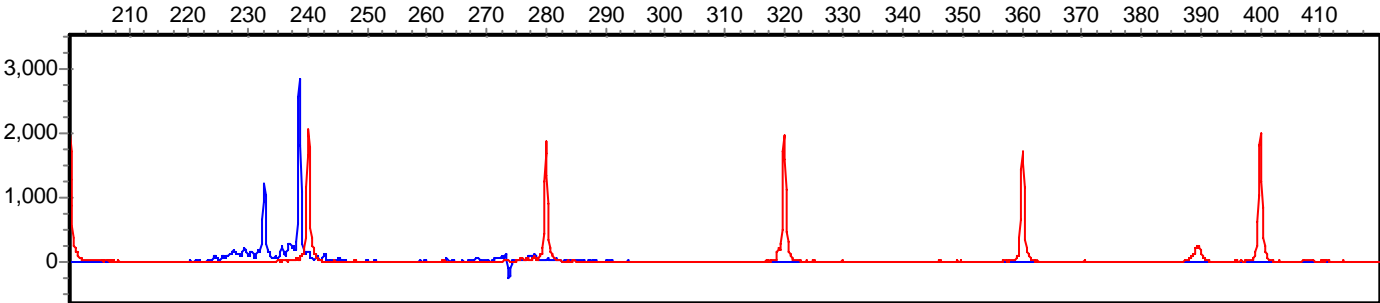

Sample 47: 47H100.fsa    Run date and time: 12/31/2016 - 10:54:02 -> 12/31/2016 - 11:37:41

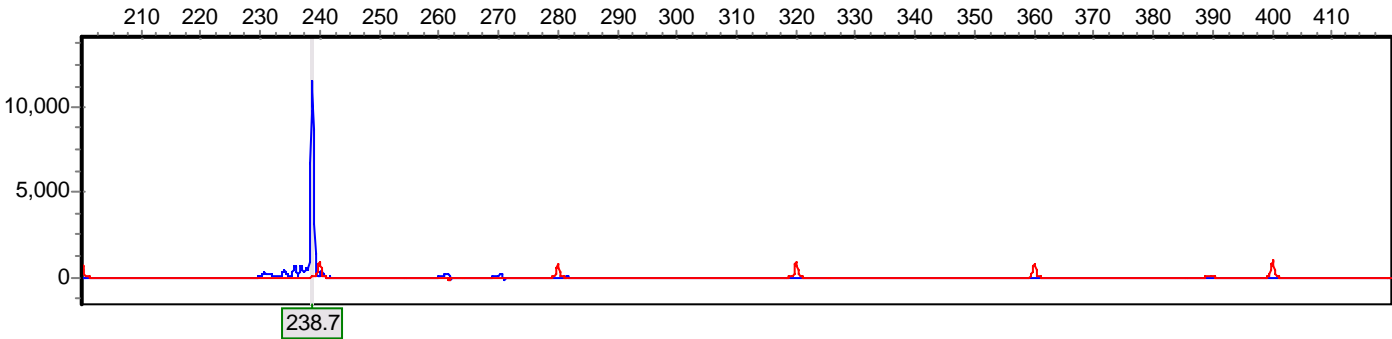

Sample 48: 48H102.fsa    Run date and time: 12/31/2016 - 10:54:02 -> 12/31/2016 - 11:37:41

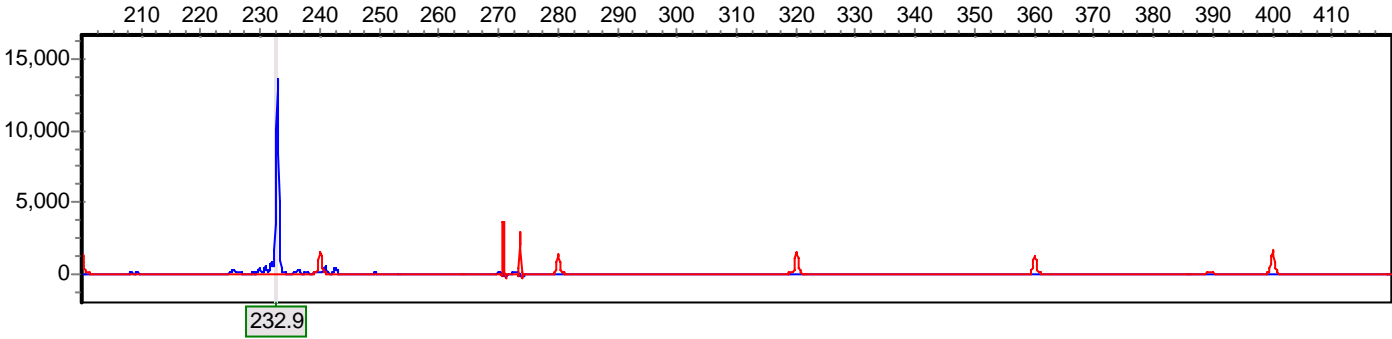

**Sample 49:** H106.fsa Run date and time: 12/31/2016 - 10:54:02 -> 12/31/2016 - 11:37:41

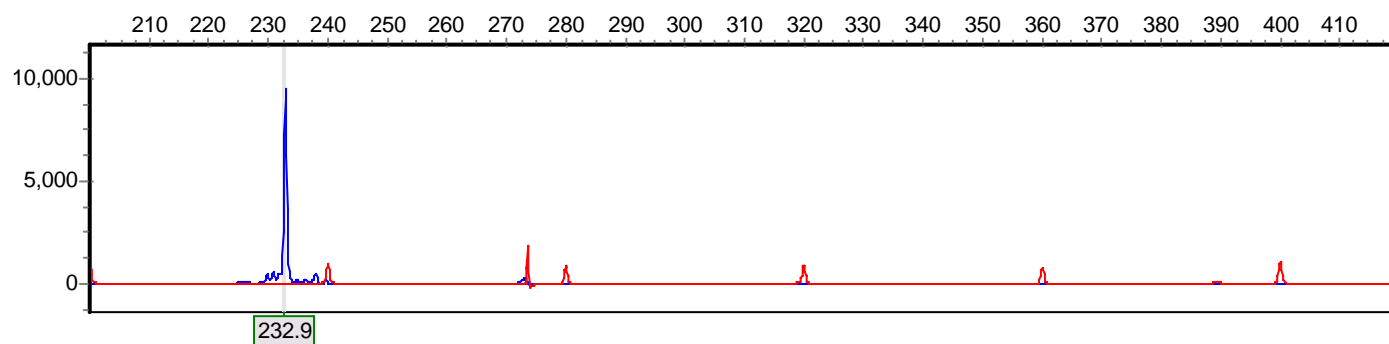

**Sample 50**H107.fsa Run date and time: 12/31/2016 - 10:54:02 -> 12/31/2016 - 11:37:41

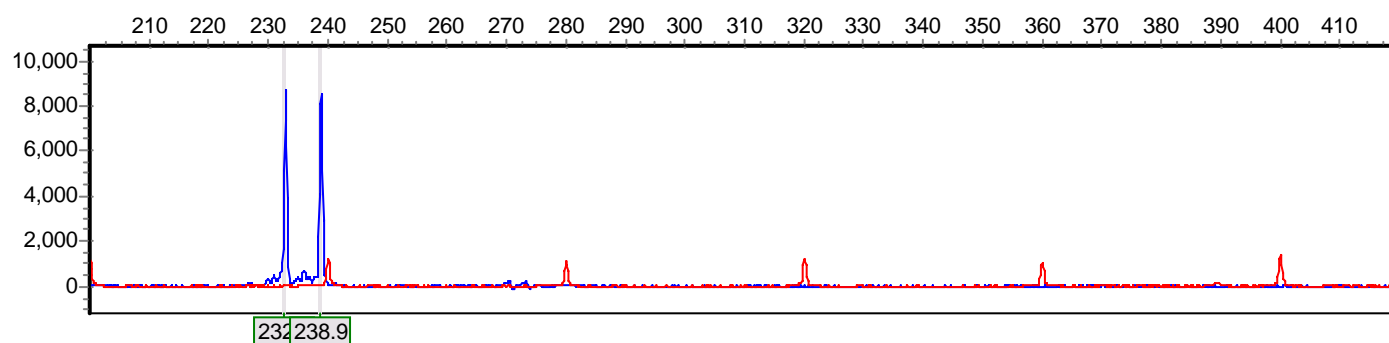

**Sample 51**H108.fsa Run date and time: 12/31/2016 - 10:54:02 -> 12/31/2016 - 11:37:41

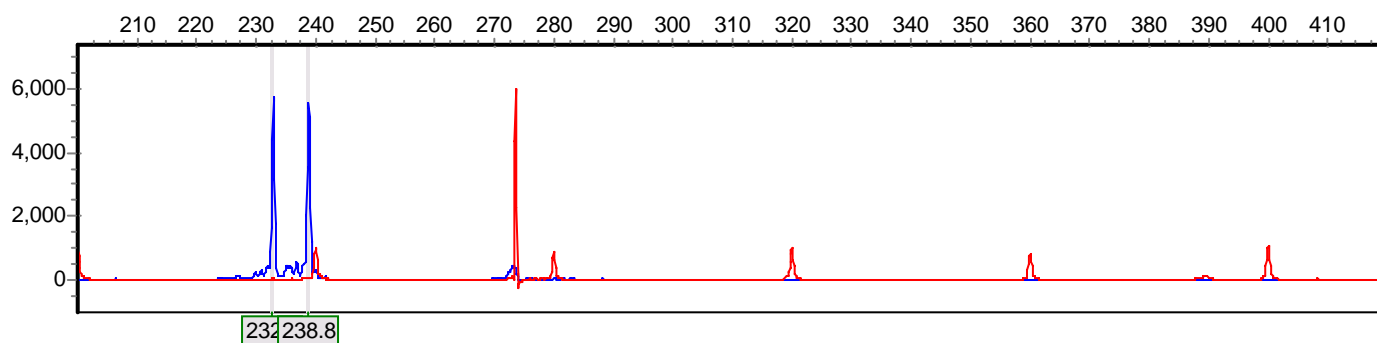

**Sample 52**H110.fsa Run date and time: 12/31/2016 - 10:54:02 -> 12/31/2016 - 11:37:41

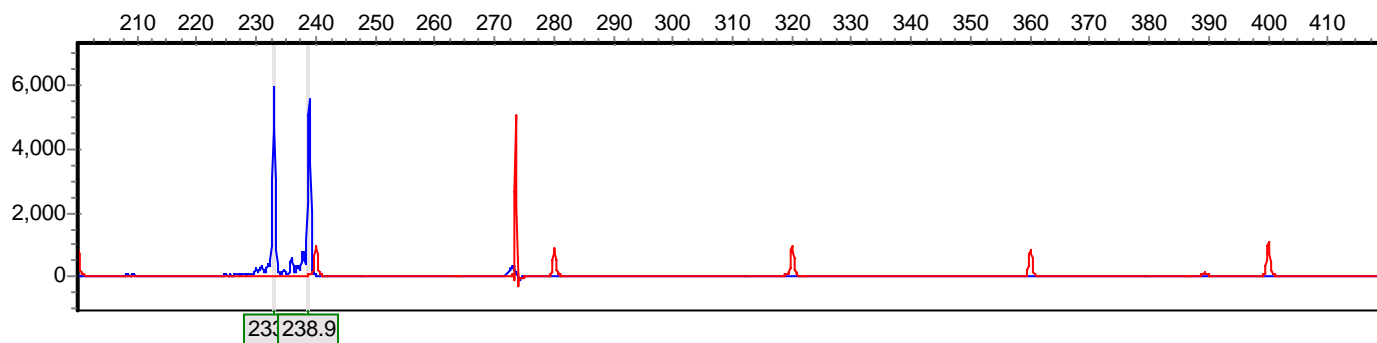

Sample 53: H111.fsa    Run date and time: 12/31/2016 - 10:54:02 -> 12/31/2016 - 11:37:41

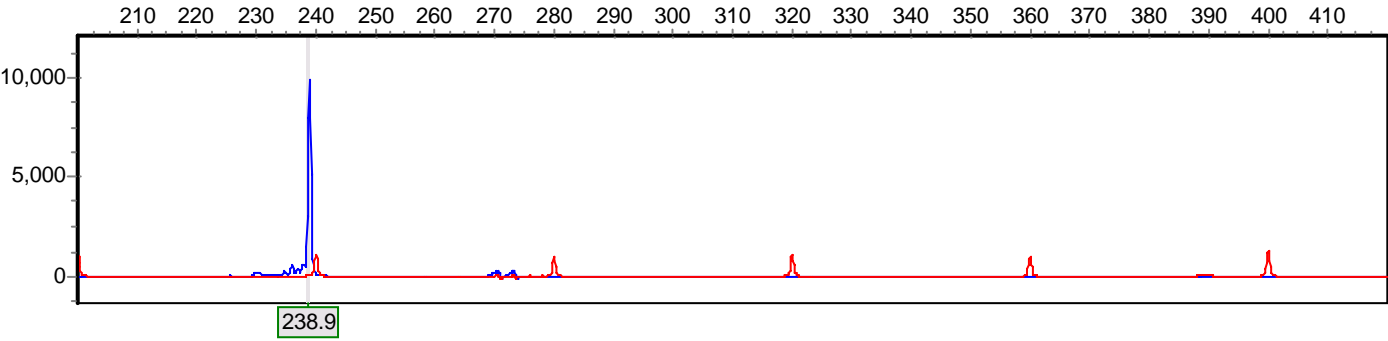

Supplement: s1 [file s1]
