# Supplementary material
Source: MDPI journal article supplement (https://www.mdpi.com/1999-4907/10/3/225)

Sample 1: 01\_A01.fsa    Run date and time: 09/22/2017 - 14:10:36 -> 09/22/2017 - 15:08:23

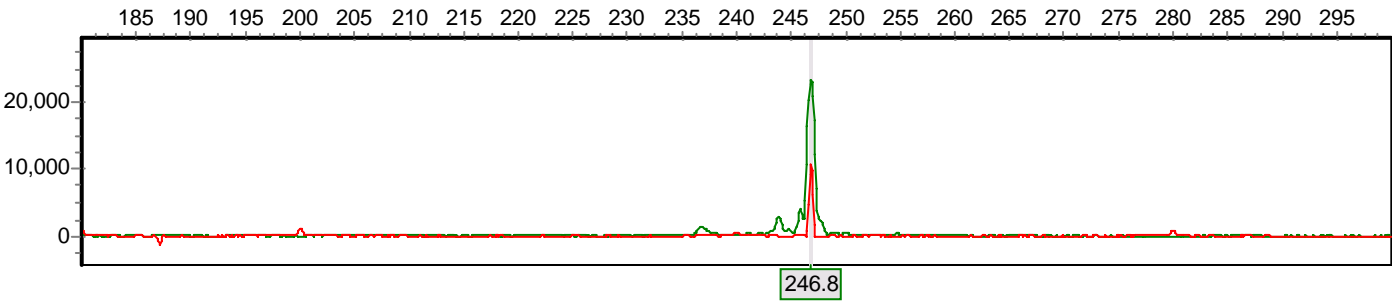

Sample 2: 02\_B01.fsa    Run date and time: 09/22/2017 - 14:10:36 -> 09/22/2017 - 15:08:23

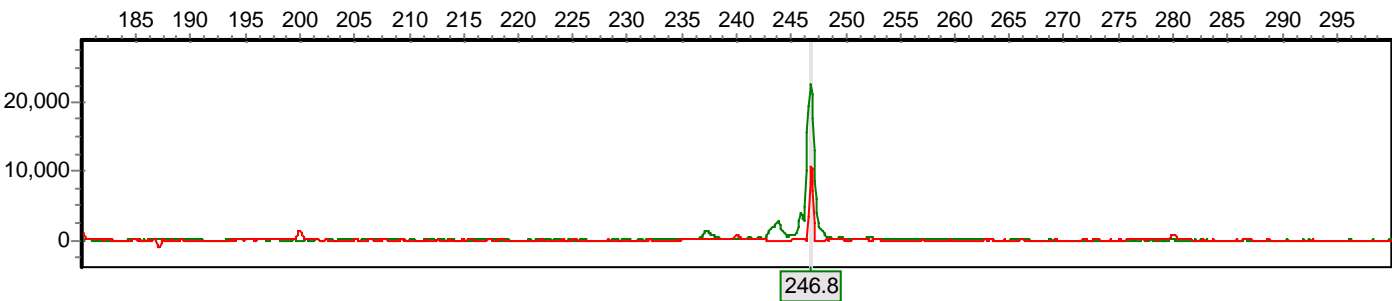

Sample 3: 03\_C01.fsa    Run date and time: 09/22/2017 - 14:10:36 -> 09/22/2017 - 15:08:23

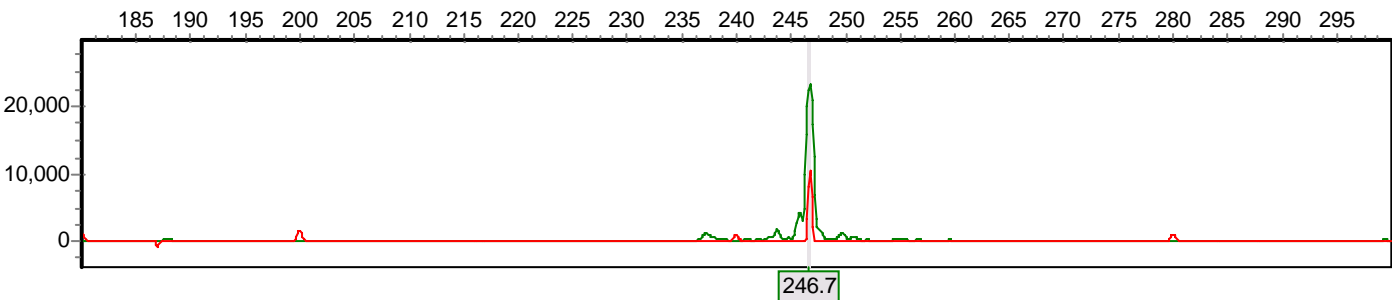

Sample 4: 04\_D01.fsa    Run date and time: 09/22/2017 - 14:10:36 -> 09/22/2017 - 15:08:23

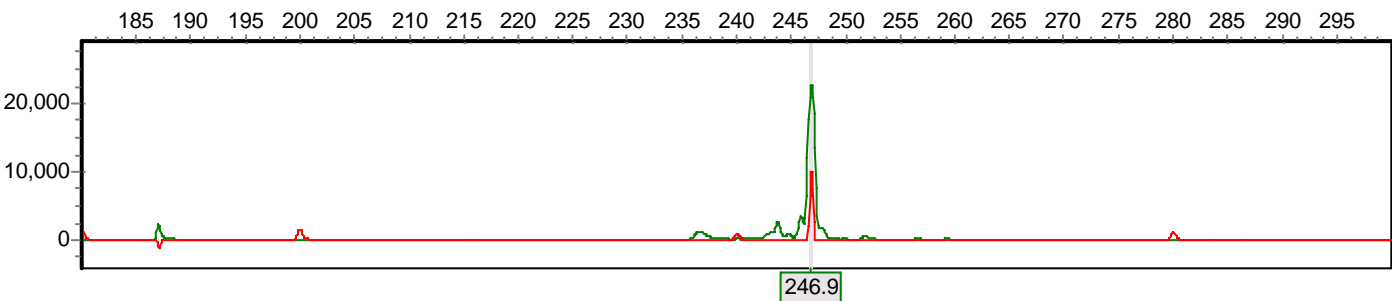

Sample 5: 05\_E01.fsa    Run date and time: 09/22/2017 - 14:10:36 -> 09/22/2017 - 15:08:23

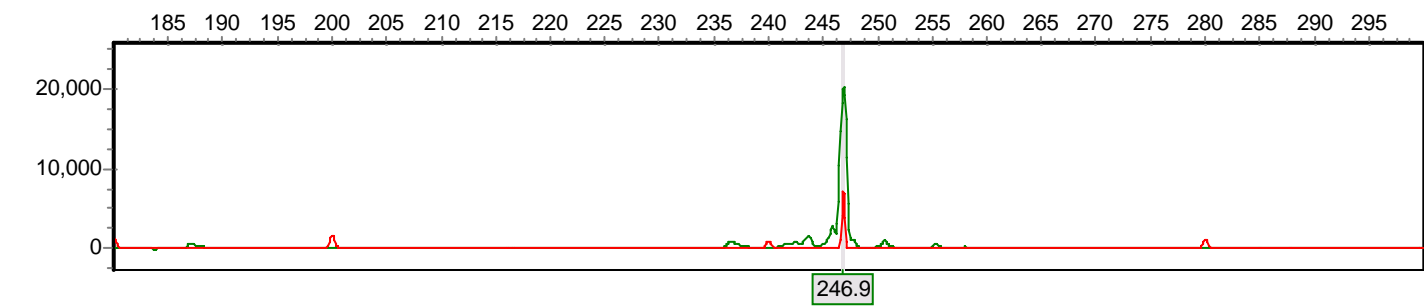

Sample 6: 06\_F01.fsa    Run date and time: 09/22/2017 - 14:10:36 -> 09/22/2017 - 15:08:23

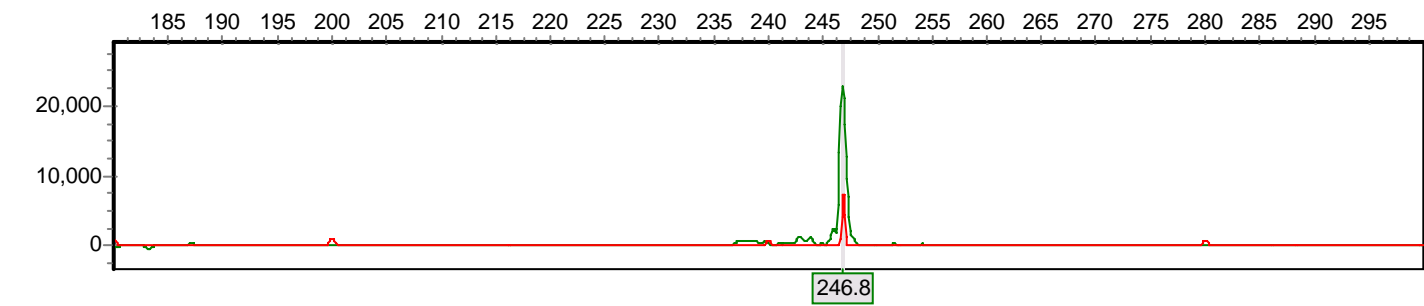

Sample 7: 07\_G01.fsa    Run date and time: 09/22/2017 - 14:10:36 -> 09/22/2017 - 15:08:23

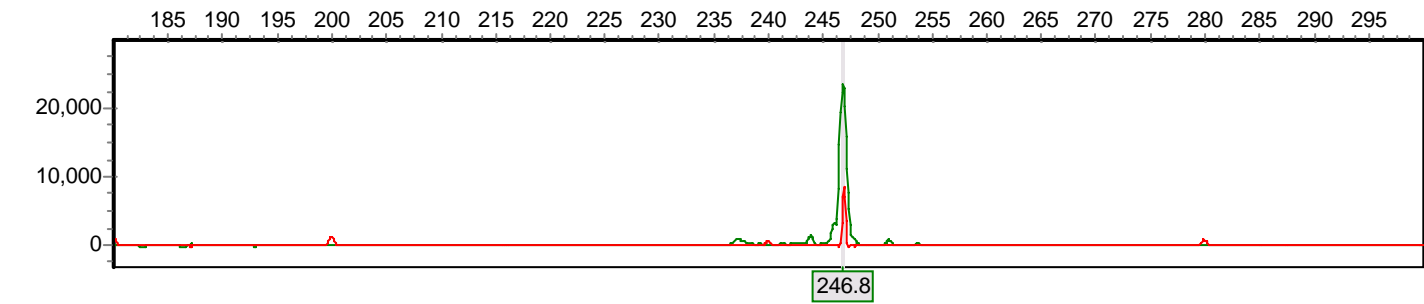

Sample 8: 08\_H01.fsa    Run date and time: 09/22/2017 - 14:10:36 -> 09/22/2017 - 15:08:23

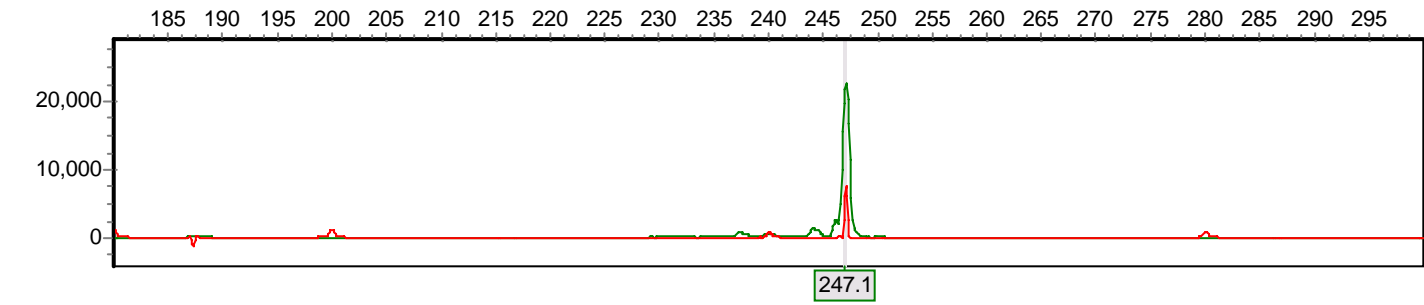

**Sample 9:** 09\_A02.fsa Run date and time: 09/22/2017 - 14:10:36 -> 09/22/2017 - 15:08:23

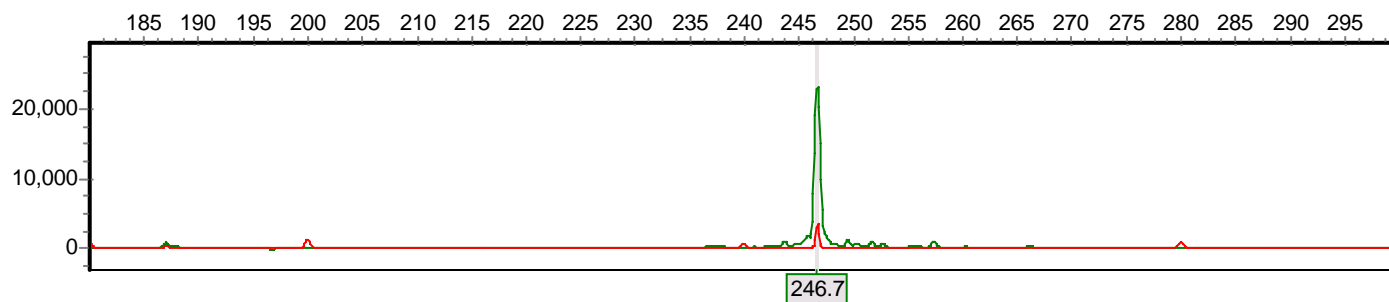

**Sample 10** 10\_B02.fsa Run date and time: 09/22/2017 - 14:10:36 -> 09/22/2017 - 15:08:23

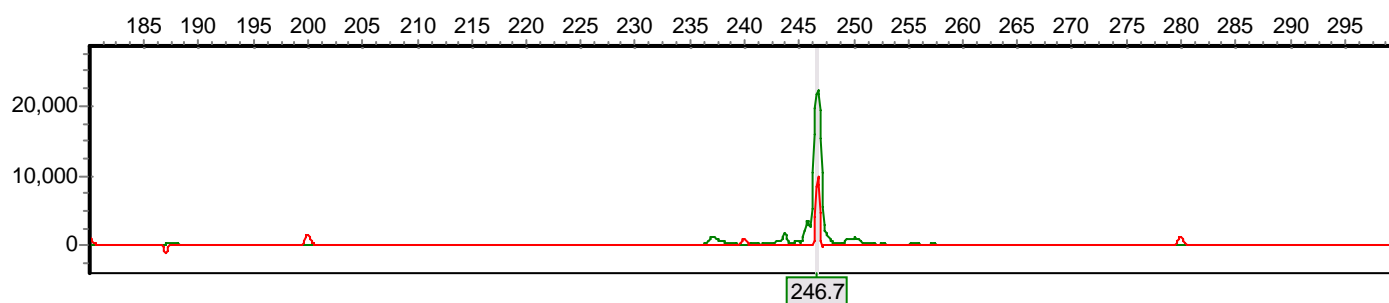

**Sample 11** 11\_C02.fsa Run date and time: 09/22/2017 - 14:10:36 -> 09/22/2017 - 15:08:23

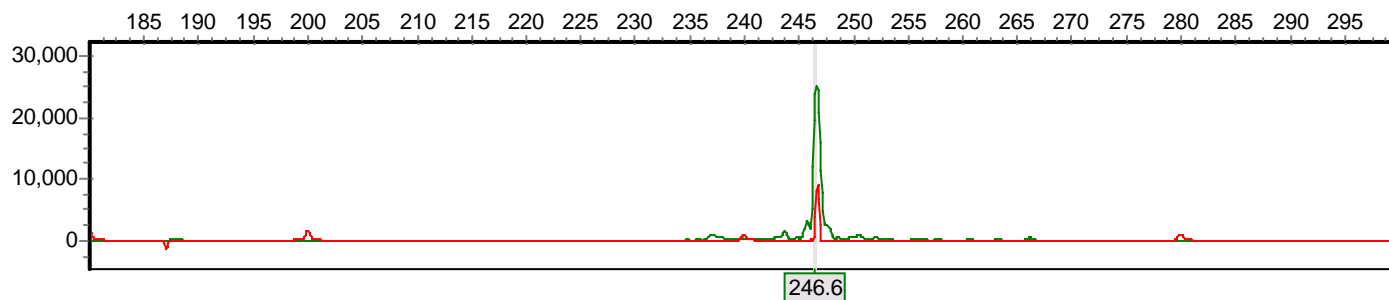

**Sample 12** 12\_D02.fsa Run date and time: 09/22/2017 - 14:10:36 -> 09/22/2017 - 15:08:23

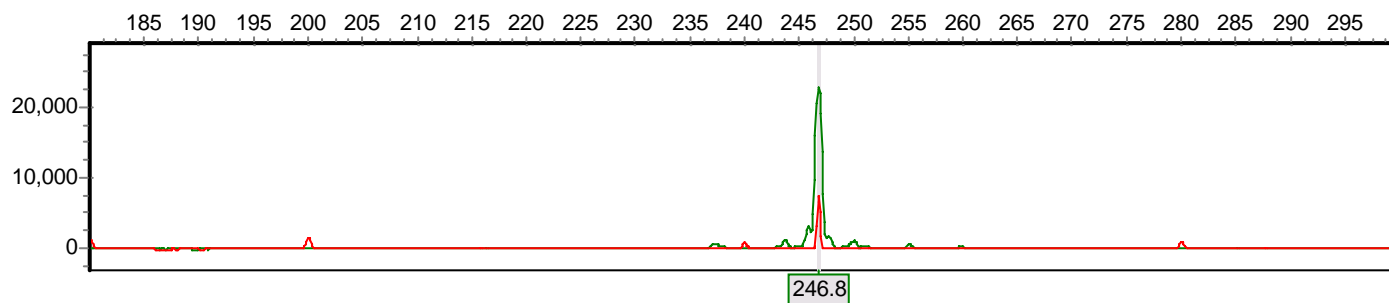

Sample 13: 13\_E02.fsa    Run date and time: 09/22/2017 - 14:10:36 -> 09/22/2017 - 15:08:23

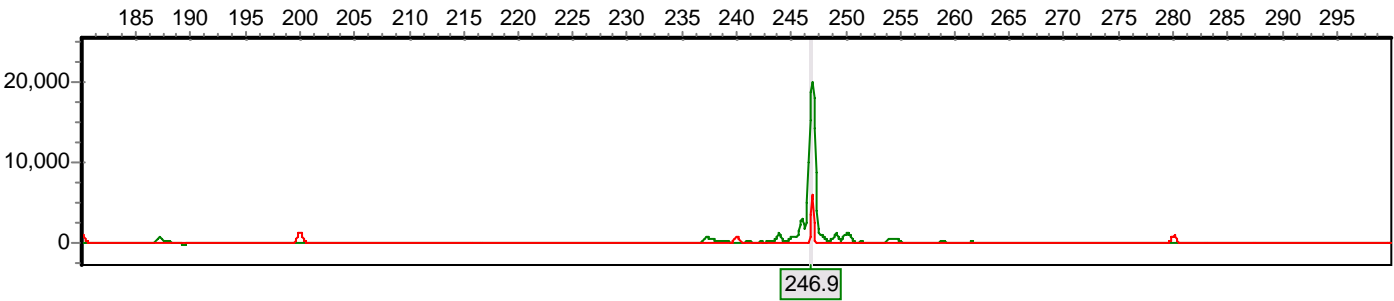

Sample 14: 14\_F02.fsa    Run date and time: 09/22/2017 - 14:10:36 -> 09/22/2017 - 15:08:23

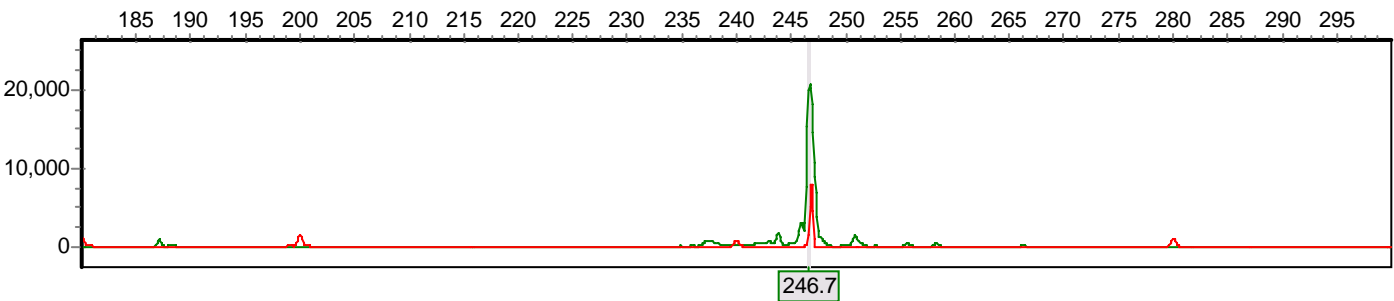

Sample 15: 15\_G02.fsa    Run date and time: 09/22/2017 - 14:10:36 -> 09/22/2017 - 15:08:23

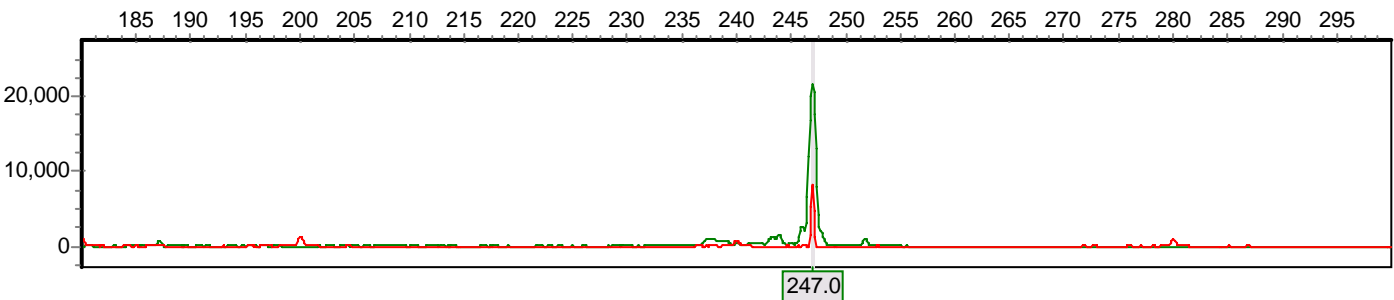

Sample 16: 16\_H02.fsa    Run date and time: 09/22/2017 - 14:10:36 -> 09/22/2017 - 15:08:23

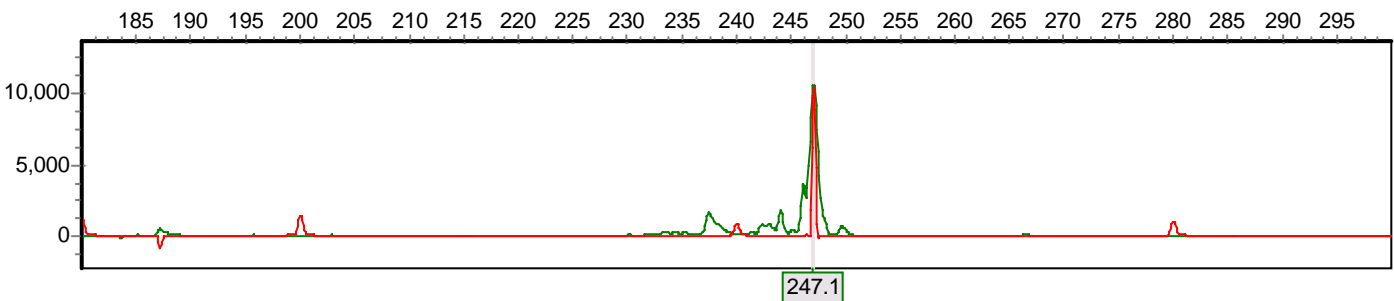

**Sample 17:** 17\_A03.fsa Run date and time: 09/22/2017 - 14:10:36 -> 09/22/2017 - 15:08:23

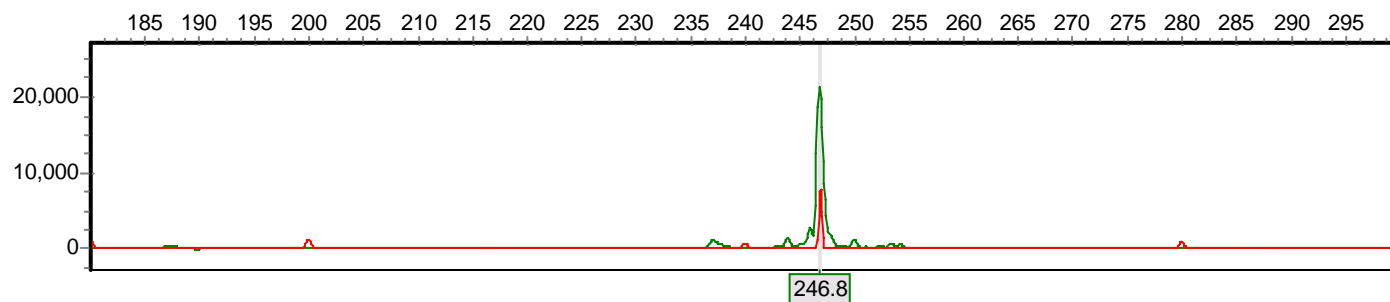

**Sample 18** 18\_B03.fsa Run date and time: 09/22/2017 - 14:10:36 -> 09/22/2017 - 15:08:23

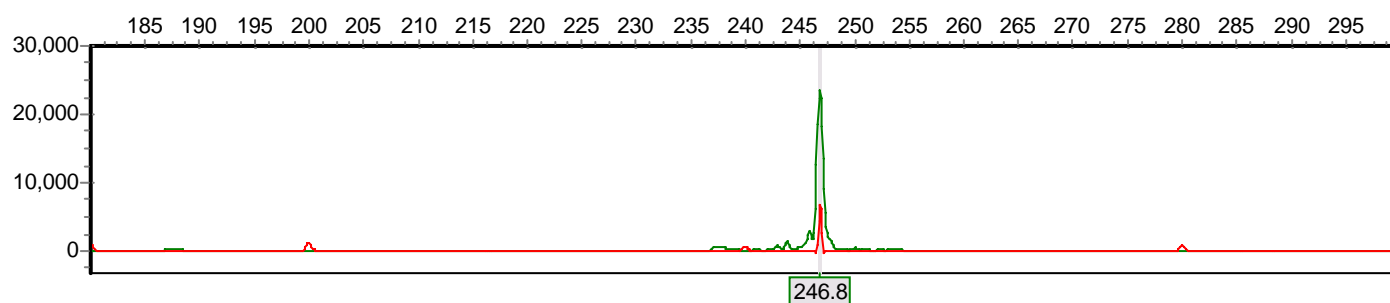

**Sample 19** 19\_C03.fsa Run date and time: 09/22/2017 - 14:10:36 -> 09/22/2017 - 15:08:23

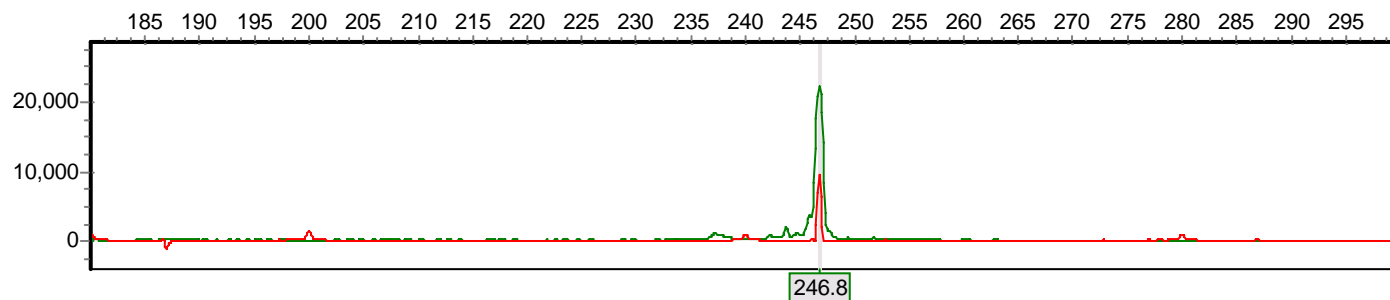

**Sample 20** 20\_D03.fsa Run date and time: 09/22/2017 - 14:10:36 -> 09/22/2017 - 15:08:23

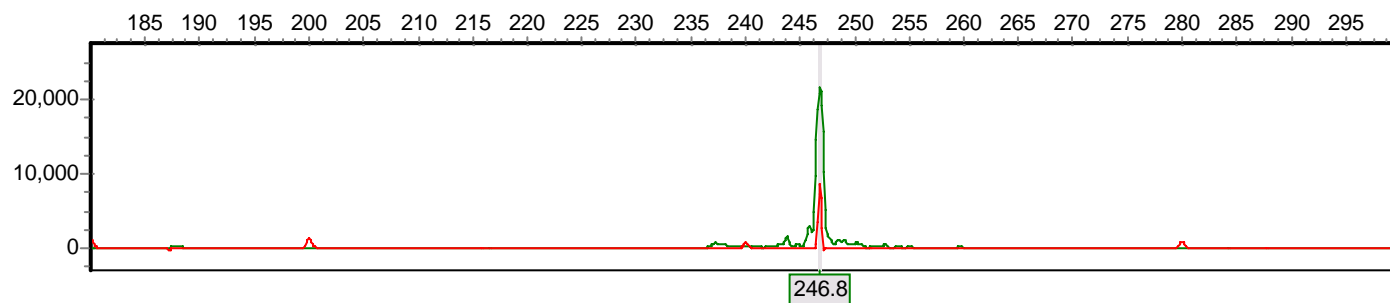

Sample 21: 21\_E03.fsa    Run date and time: 09/22/2017 - 14:10:36 -> 09/22/2017 - 15:08:23

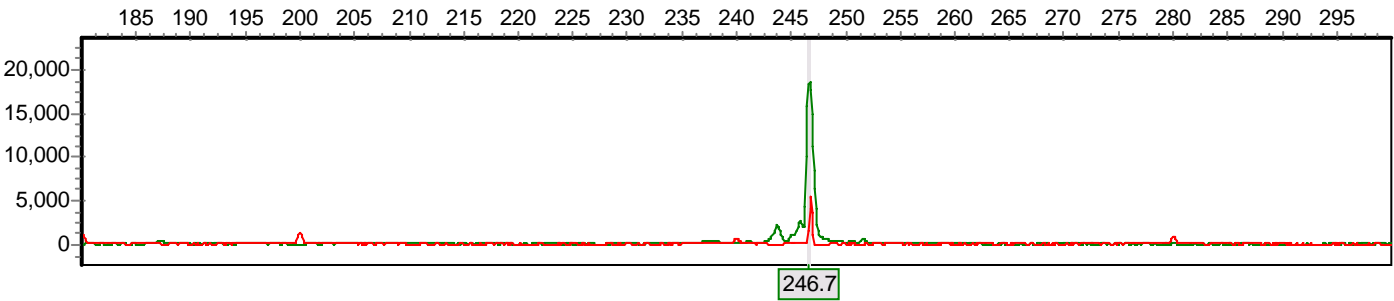

Sample 2222\_F03.fsa    Run date and time: 09/22/2017 - 14:10:36 -> 09/22/2017 - 15:08:23

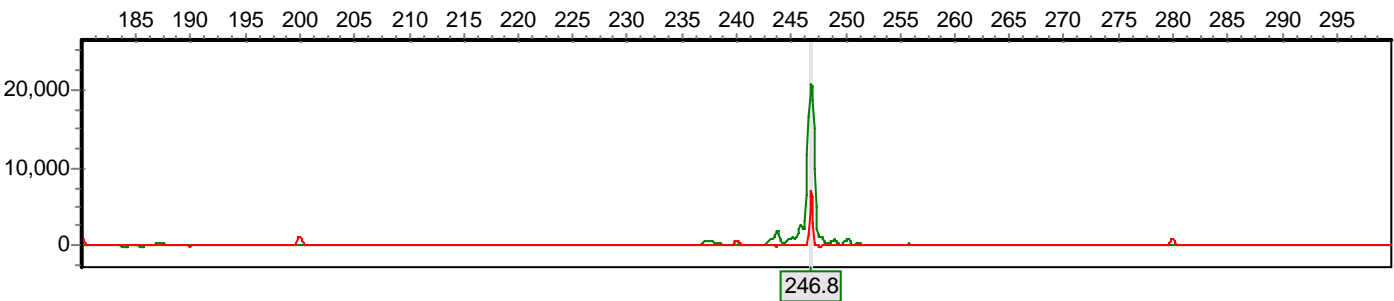

Sample 2323\_G03.fsa    Run date and time: 09/22/2017 - 14:10:36 -> 09/22/2017 - 15:08:23

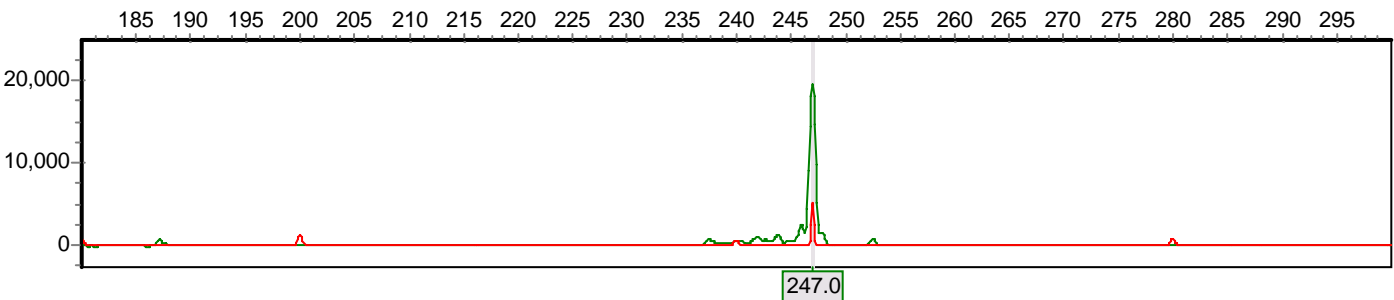

Sample 2424\_H03.fsa    Run date and time: 09/22/2017 - 14:10:36 -> 09/22/2017 - 15:08:23

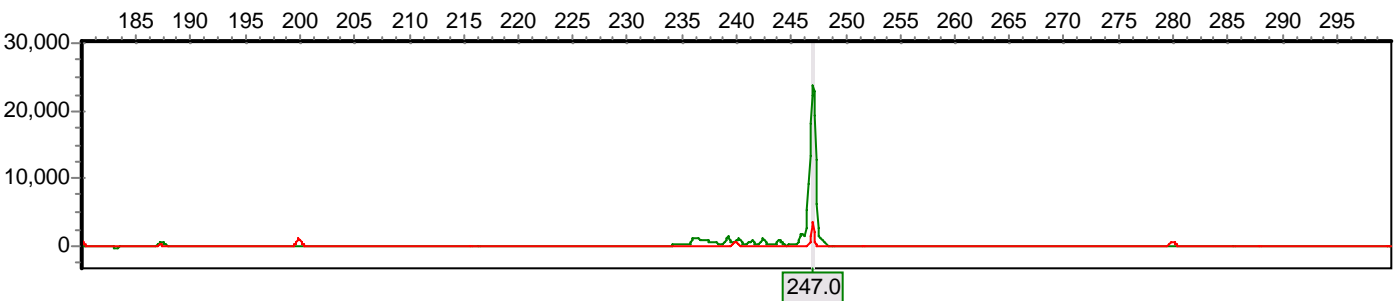

**Sample 25:** 25\_A04.fsa Run date and time: 09/22/2017 - 14:10:36 -> 09/22/2017 - 15:08:23

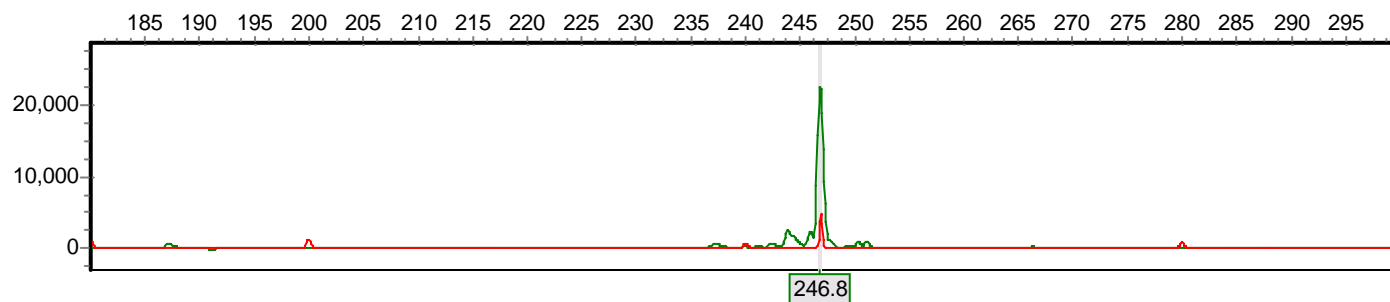

**Sample 26:** 26\_B04.fsa Run date and time: 09/22/2017 - 14:10:36 -> 09/22/2017 - 15:08:23

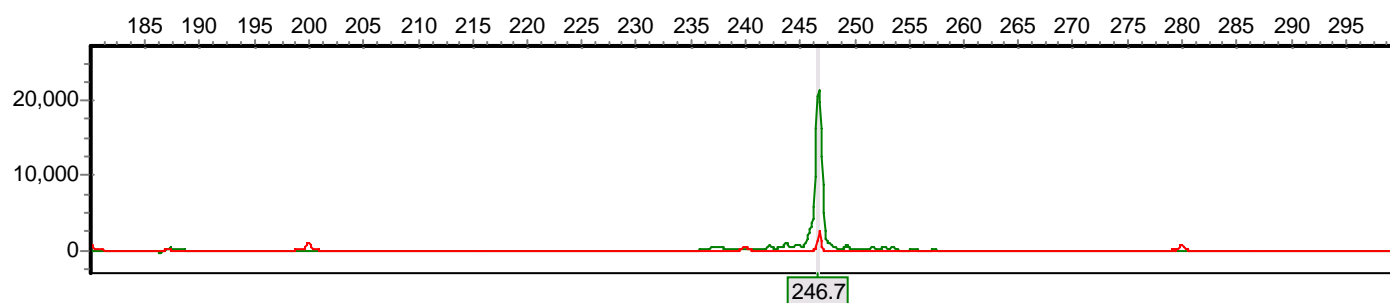

**Sample 27:** 27\_C04.fsa Run date and time: 09/22/2017 - 14:10:36 -> 09/22/2017 - 15:08:23

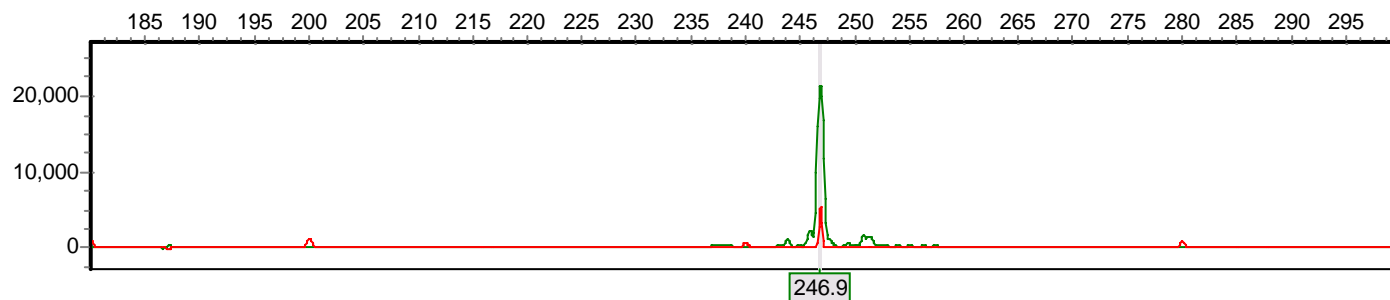

**Sample 28:** 28\_D04.fsa Run date and time: 09/22/2017 - 14:10:36 -> 09/22/2017 - 15:08:23

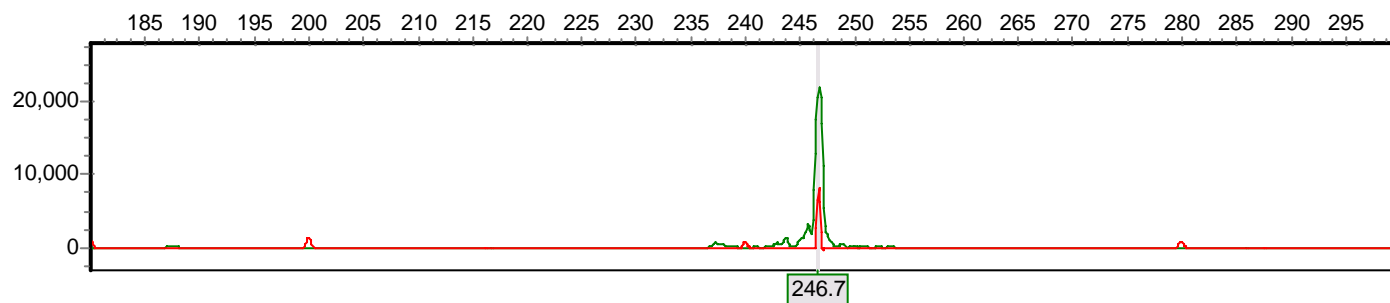

**Sample 29:** 29\_E04.fsa Run date and time: 09/22/2017 - 14:10:36 -> 09/22/2017 - 15:08:23

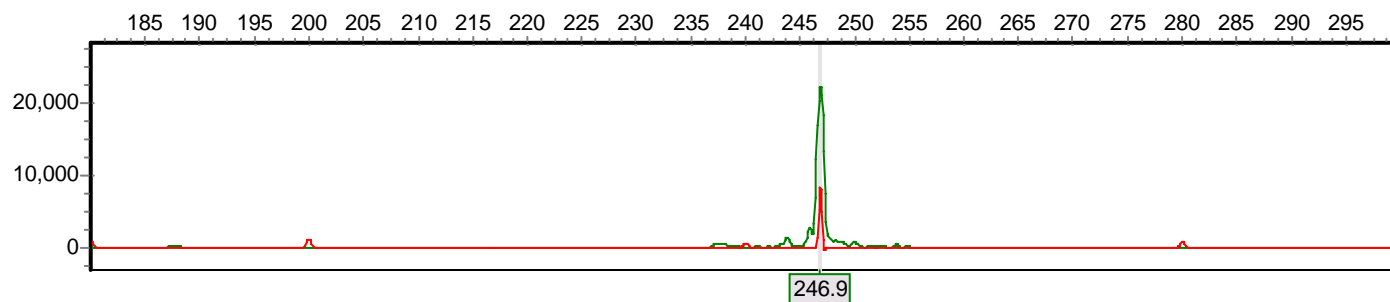

**Sample 30** 30\_F04.fsa Run date and time: 09/22/2017 - 14:10:36 -> 09/22/2017 - 15:08:23

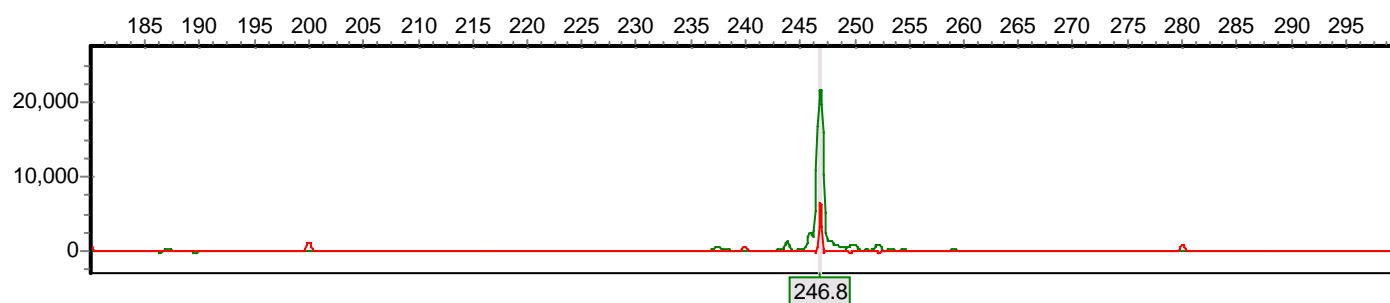

**Sample 31** 31\_G04.fsa Run date and time: 09/22/2017 - 14:10:36 -> 09/22/2017 - 15:08:23

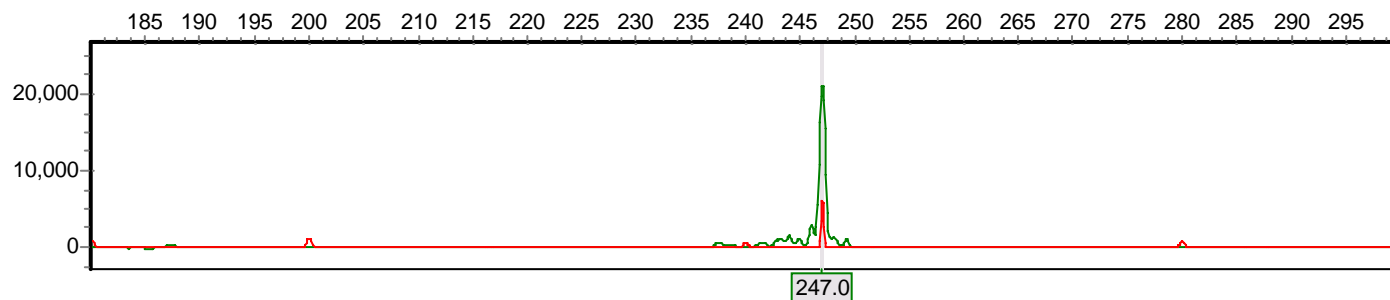

**Sample 32** 32\_H04.fsa Run date and time: 09/22/2017 - 14:10:36 -> 09/22/2017 - 15:08:23

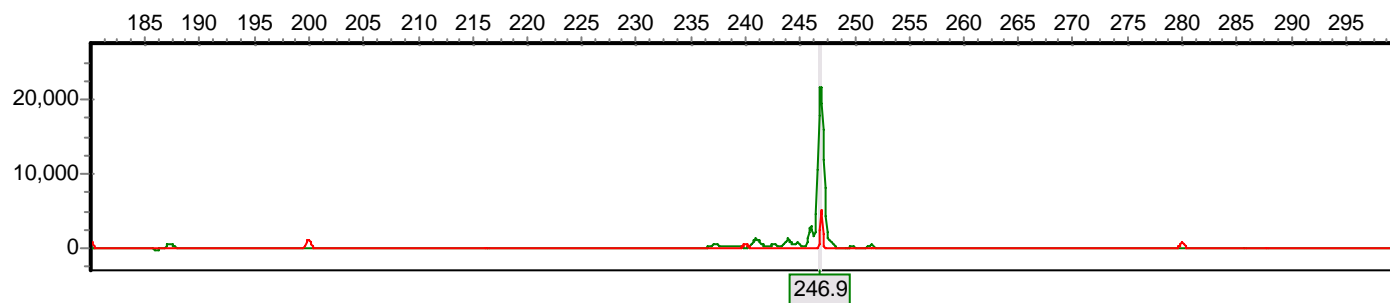



Sample 33: 33\_A05.fsa    Run date and time: 09/22/2017 - 14:10:36 -> 09/22/2017 - 15:08:23

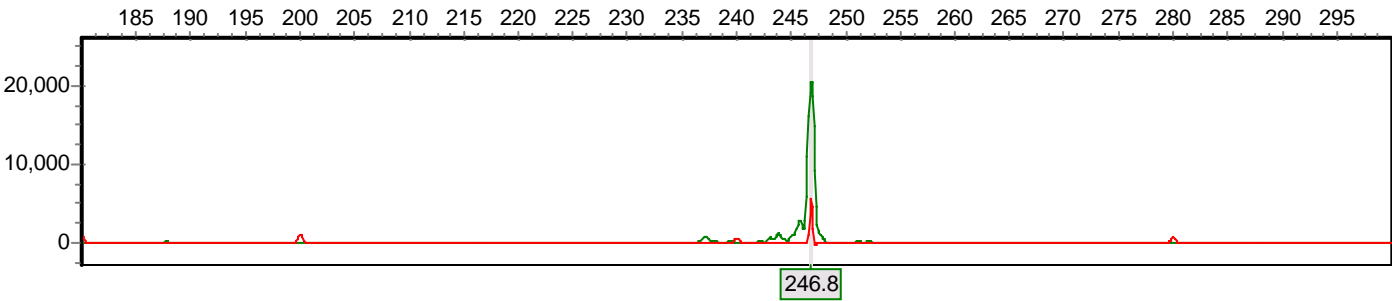

Sample 34: 34\_B05.fsa    Run date and time: 09/22/2017 - 14:10:36 -> 09/22/2017 - 15:08:23

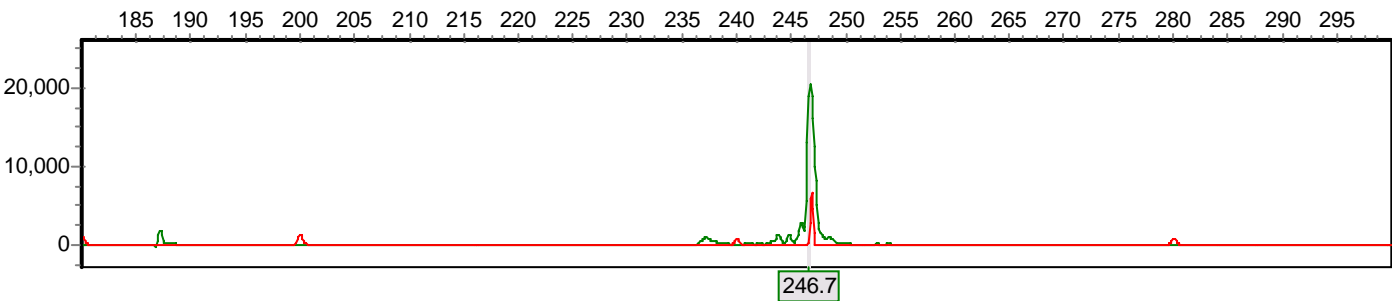

Sample 35: 35\_C05.fsa    Run date and time: 09/22/2017 - 14:10:36 -> 09/22/2017 - 15:08:23

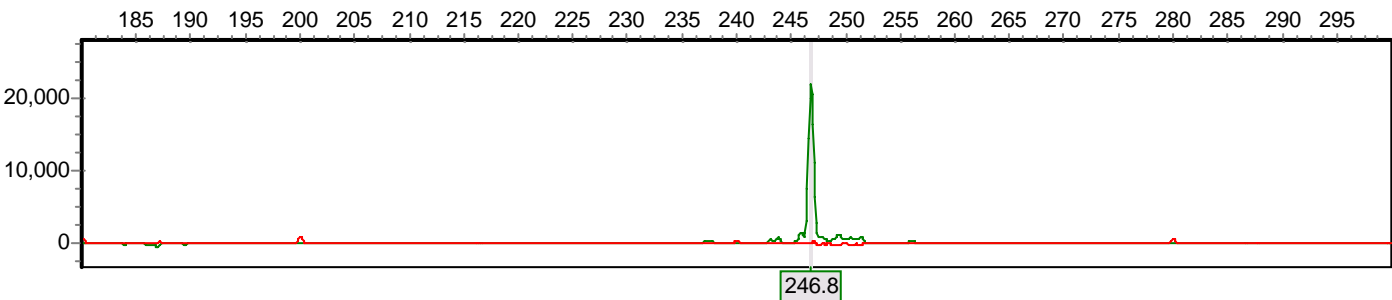

Sample 36: 36\_D05.fsa    Run date and time: 09/22/2017 - 14:10:36 -> 09/22/2017 - 15:08:23

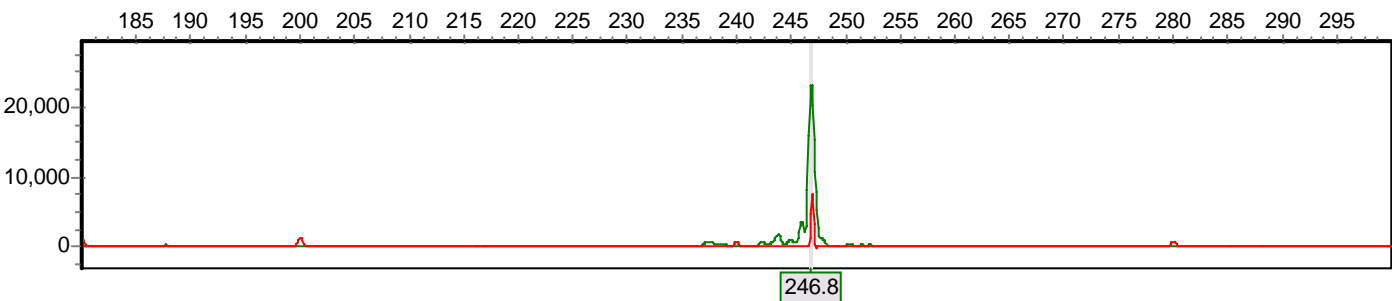

**Sample 37:** 37\_E05.fsa Run date and time: 09/22/2017 - 14:10:36 -> 09/22/2017 - 15:08:23

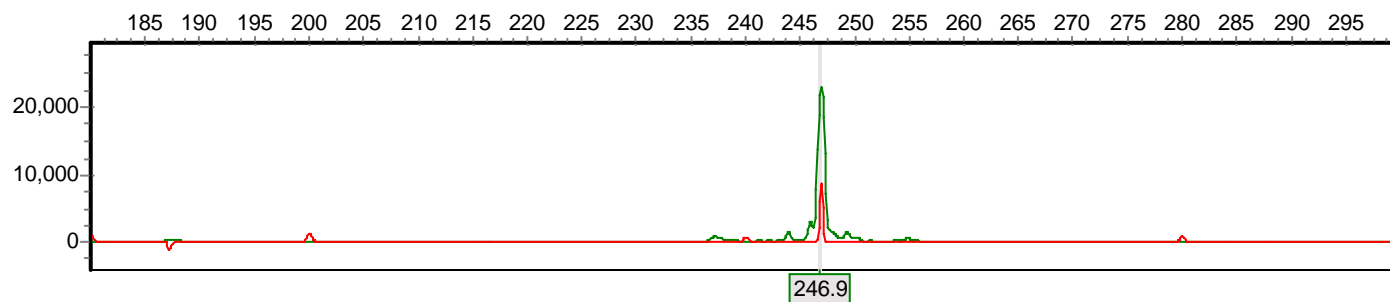

**Sample 38**38\_F05.fsa Run date and time: 09/22/2017 - 14:10:36 -> 09/22/2017 - 15:08:23

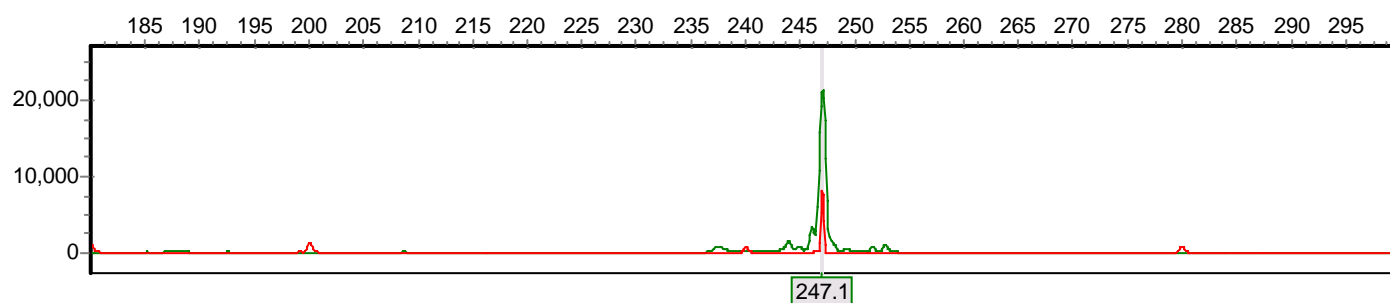

**Sample 39**39\_G05.fsa Run date and time: 09/22/2017 - 14:10:36 -> 09/22/2017 - 15:08:23

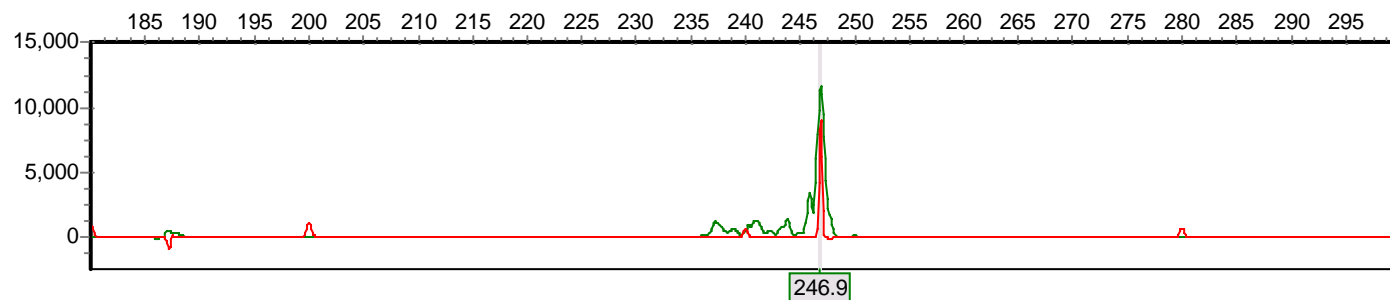

**Sample 40**40\_H05.fsa Run date and time: 09/22/2017 - 14:10:36 -> 09/22/2017 - 15:08:23

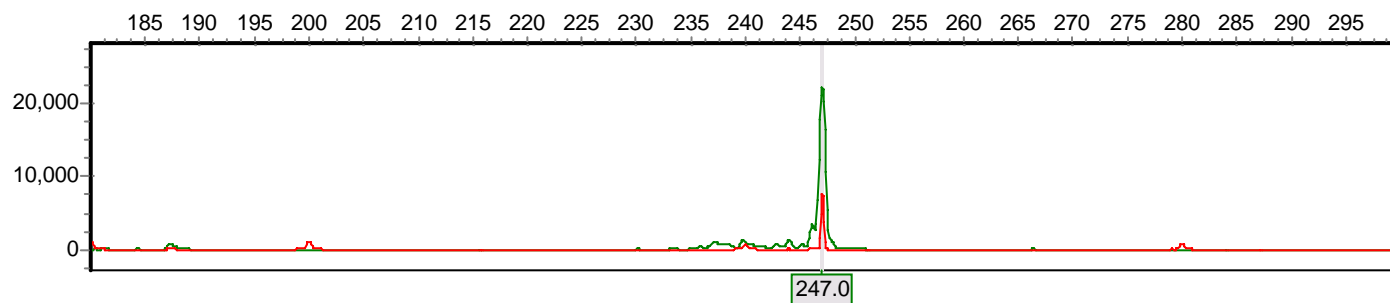

Sample 41: 41\_A06.fsa    Run date and time: 09/22/2017 - 14:10:36 -> 09/22/2017 - 15:08:23

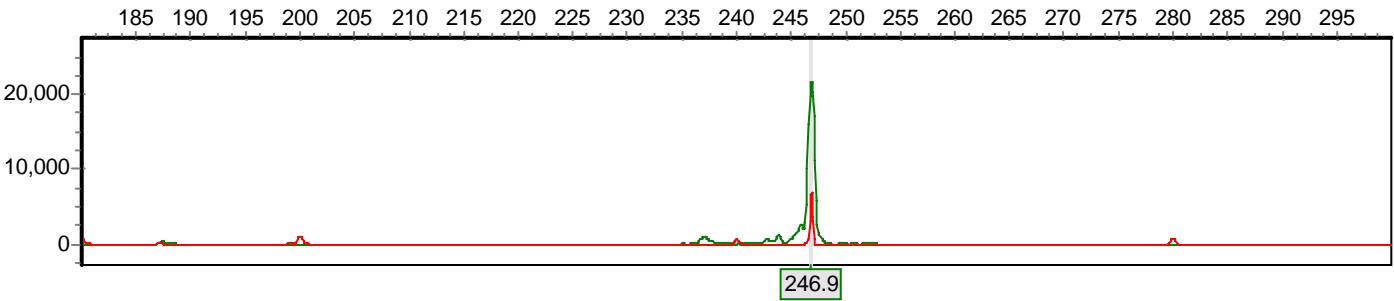

Sample 42: 42\_B06.fsa    Run date and time: 09/22/2017 - 14:10:36 -> 09/22/2017 - 15:08:23

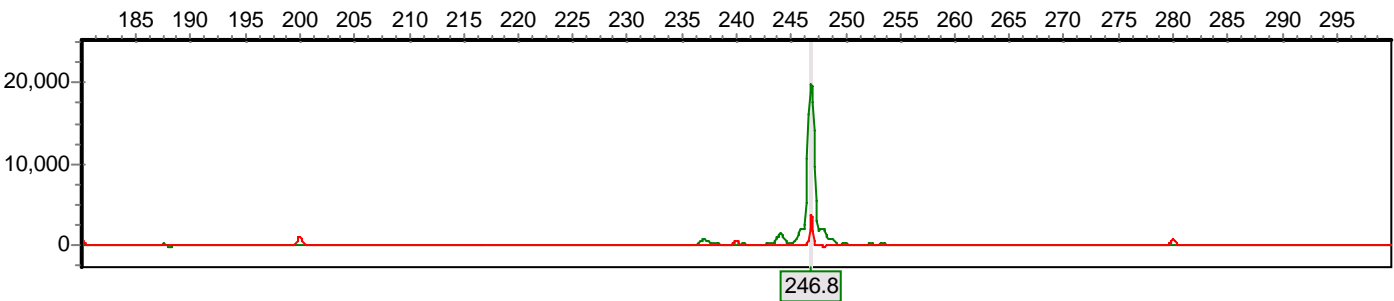

Sample 43: 43\_C06.fsa    Run date and time: 09/22/2017 - 14:10:36 -> 09/22/2017 - 15:08:23

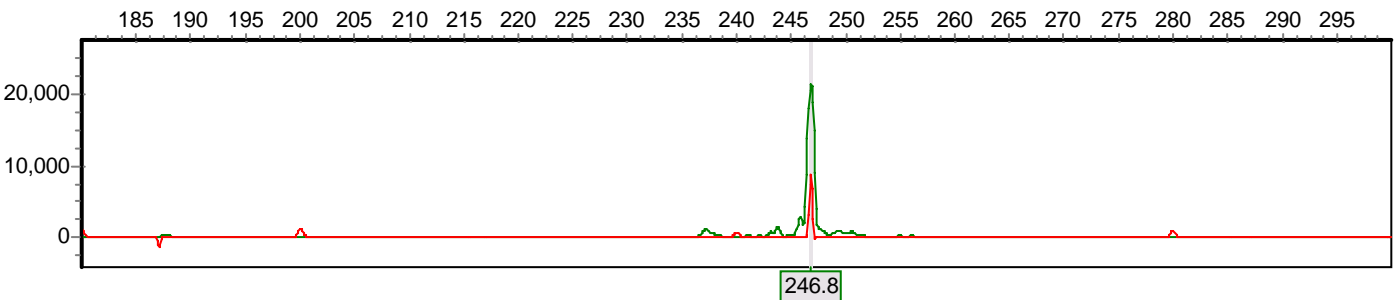

Sample 44: 44\_D06.fsa    Run date and time: 09/22/2017 - 14:10:36 -> 09/22/2017 - 15:08:23

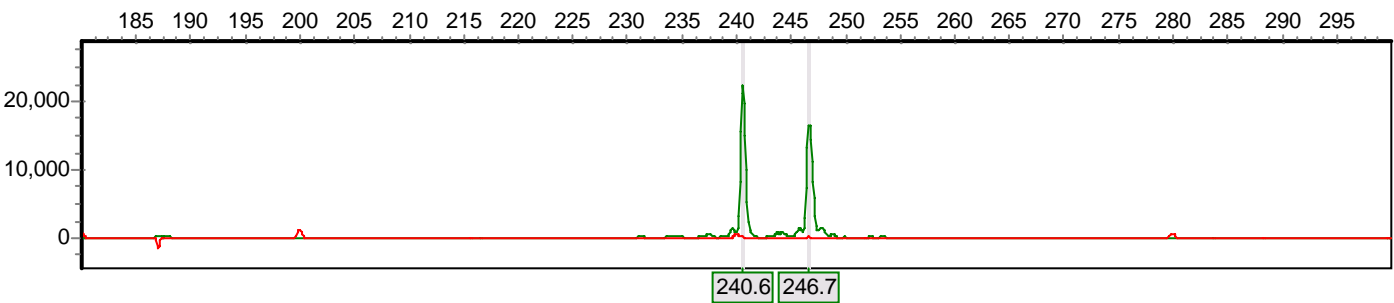

**Sample 45:** 45\_E06.fsa Run date and time: 09/22/2017 - 14:10:36 -> 09/22/2017 - 15:08:23

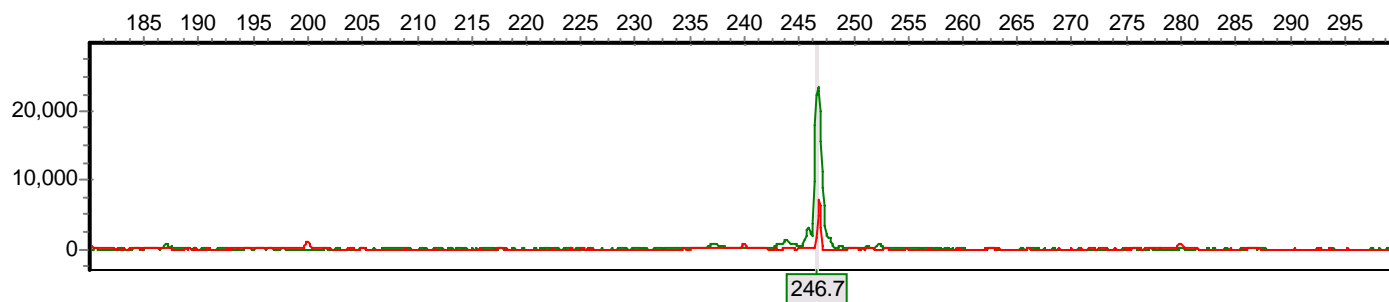

**Sample 46:** 46\_F06.fsa Run date and time: 09/22/2017 - 14:10:36 -> 09/22/2017 - 15:08:23

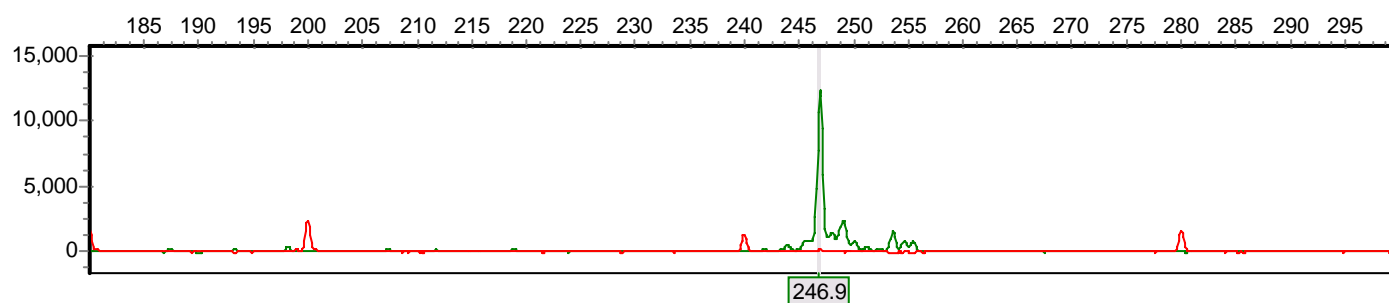

**Sample 47:** 47\_G06.fsa Run date and time: 09/22/2017 - 14:10:36 -> 09/22/2017 - 15:08:23

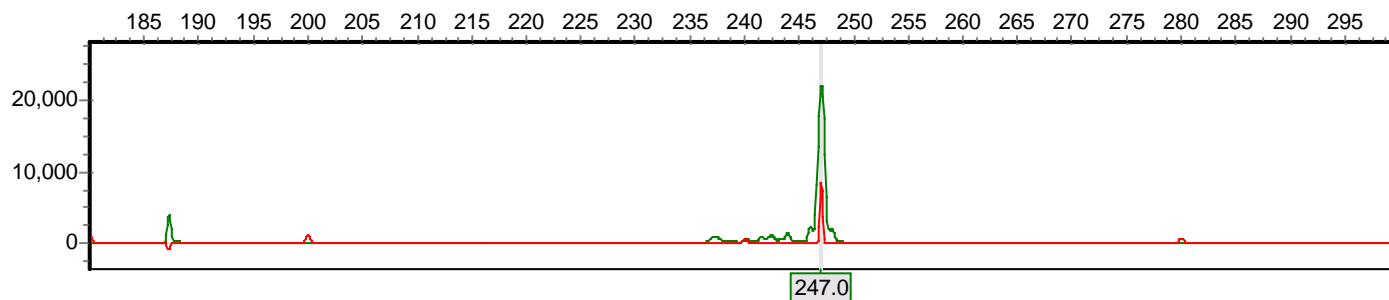

**Sample 48:** 48\_H06.fsa Run date and time: 09/22/2017 - 14:10:36 -> 09/22/2017 - 15:08:23

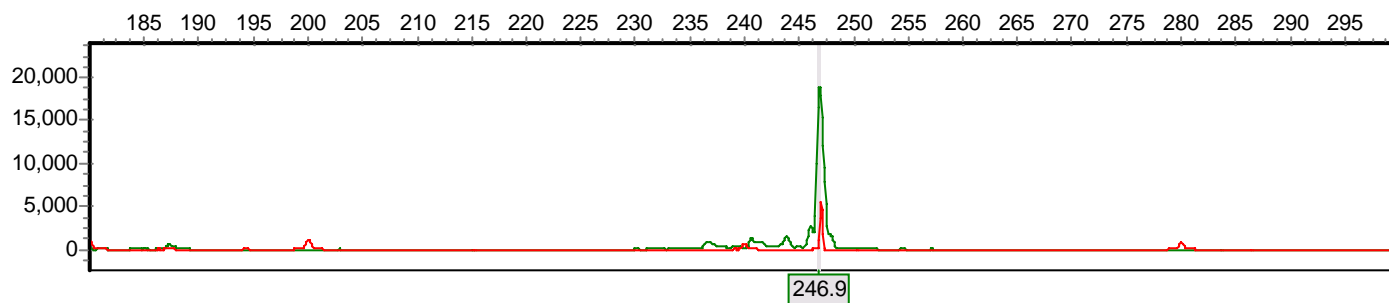

Sample 49: 49\_A07.fsa    Run date and time: 09/22/2017 - 14:10:36 -> 09/22/2017 - 15:08:23

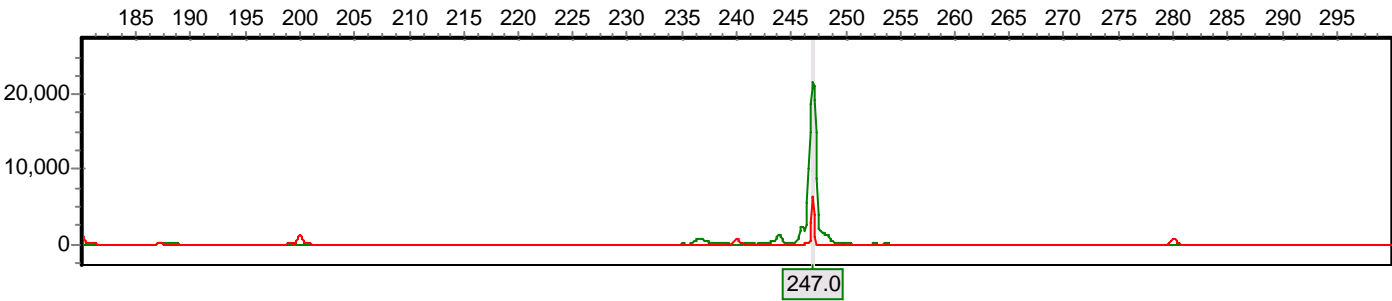

Sample 5050\_B07.fsa    Run date and time: 09/22/2017 - 14:10:36 -> 09/22/2017 - 15:08:23

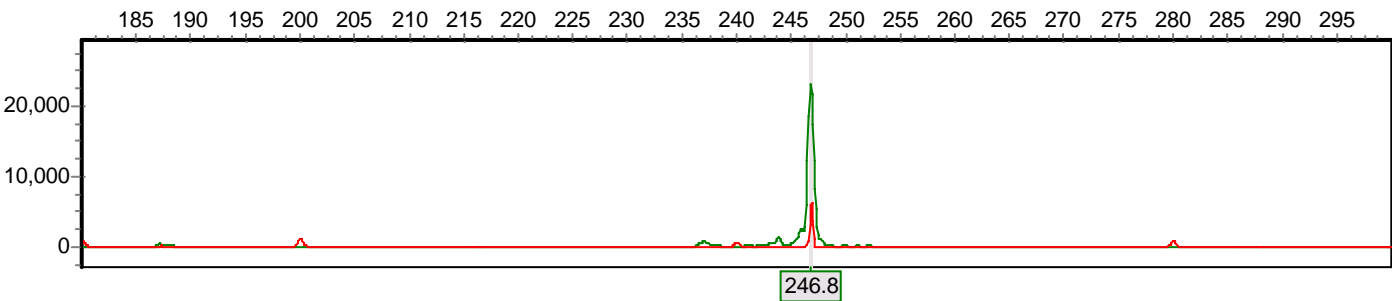

Sample 5151\_C07.fsa    Run date and time: 09/22/2017 - 14:10:36 -> 09/22/2017 - 15:08:23

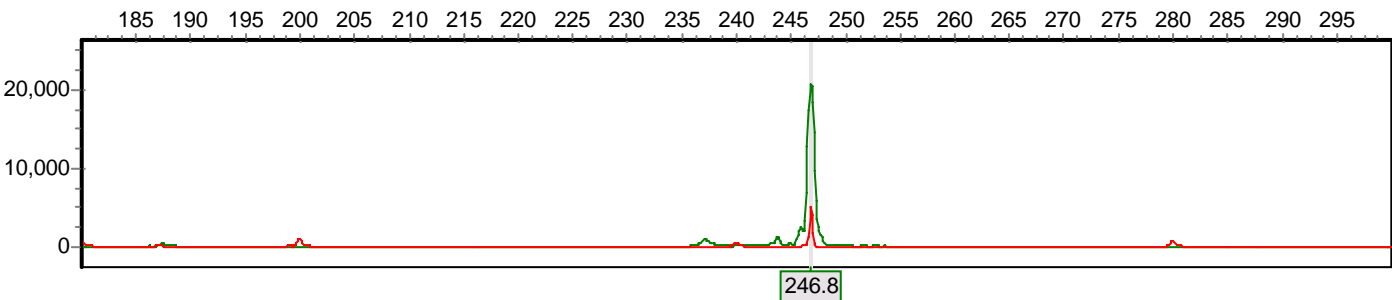

Sample 5252\_D07.fsa    Run date and time: 09/22/2017 - 14:10:36 -> 09/22/2017 - 15:08:23

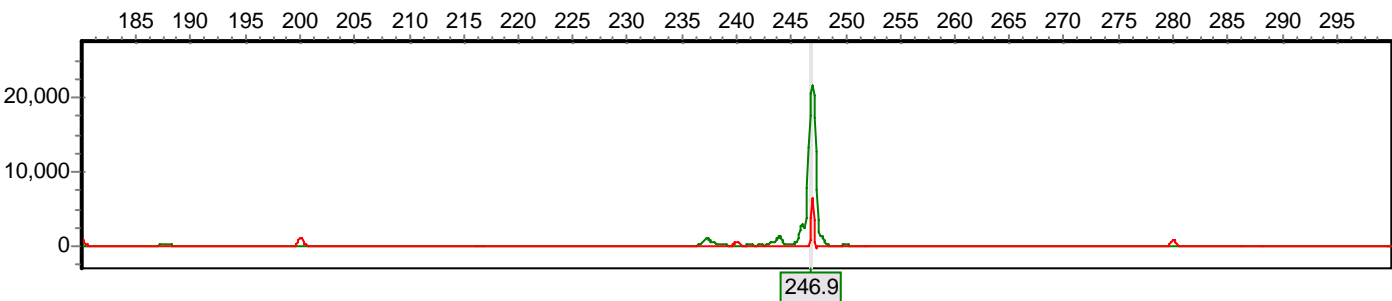

Sample 53: 53\_E07.fsa    Run date and time: 09/22/2017 - 14:10:36 -> 09/22/2017 - 15:08:23

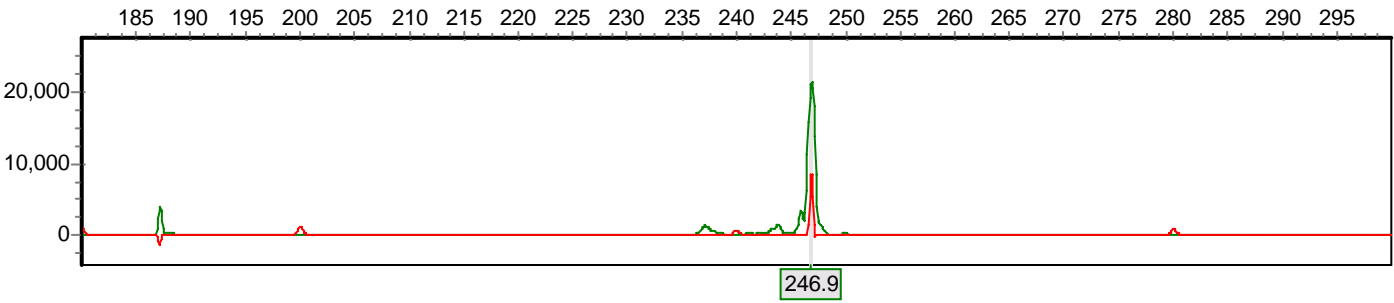

Supplement: s1 [file s1]
