# Supplementary material
Source: MDPI journal article supplement (https://www.mdpi.com/1999-4907/10/3/225)

Sample 1: 01\_A01.fsa    Run date and time: 09/22/2017 - 15:09:09 -> 09/22/2017 - 15:52:49

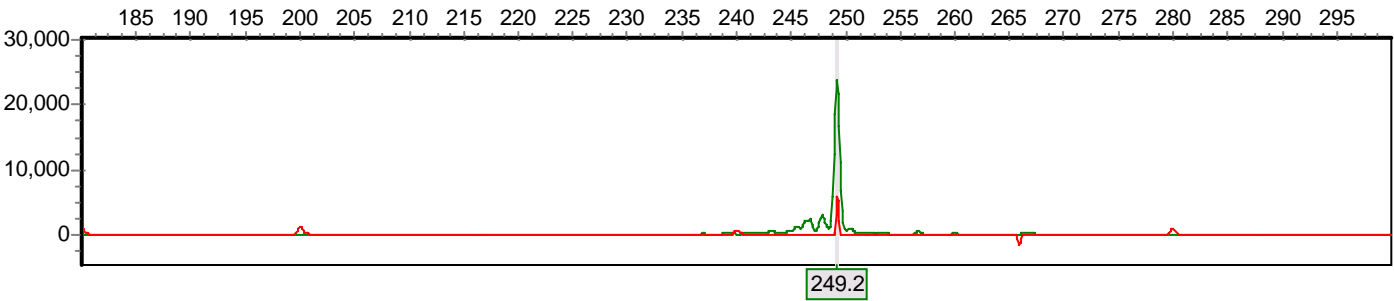

Sample 2: 02\_B01.fsa    Run date and time: 09/22/2017 - 15:09:09 -> 09/22/2017 - 15:52:49

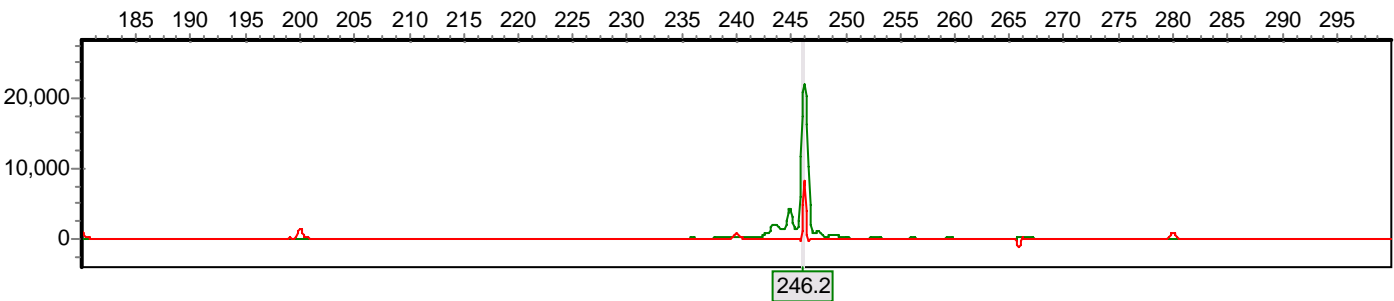

Sample 3: 03\_C01.fsa    Run date and time: 09/22/2017 - 15:09:09 -> 09/22/2017 - 15:52:49

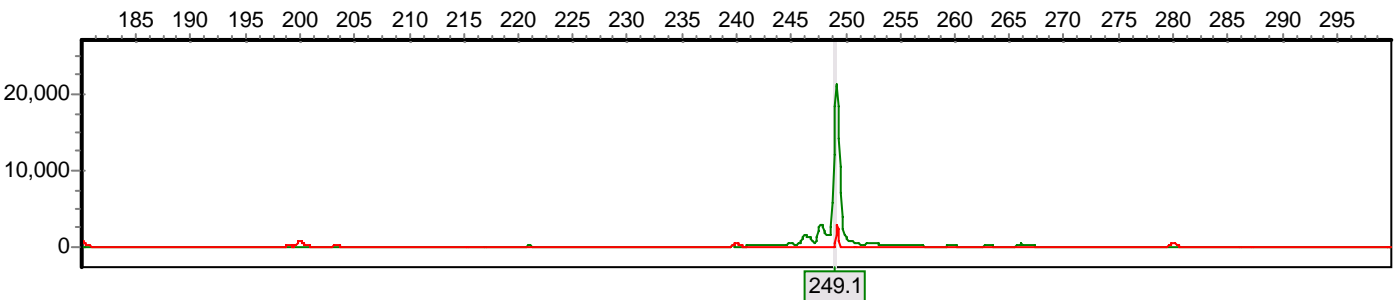

Sample 4: 04\_D01.fsa    Run date and time: 09/22/2017 - 15:09:09 -> 09/22/2017 - 15:52:49

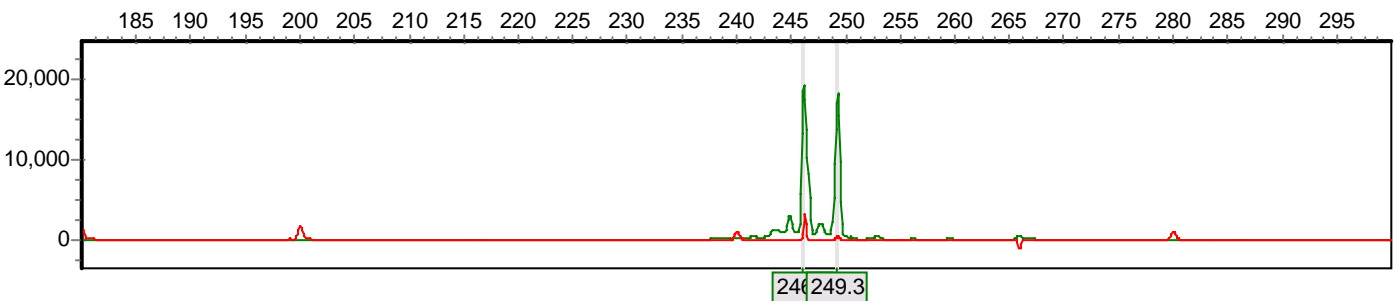

Sample 5: 05\_E01.fsa    Run date and time: 09/22/2017 - 15:09:09 -> 09/22/2017 - 15:52:49

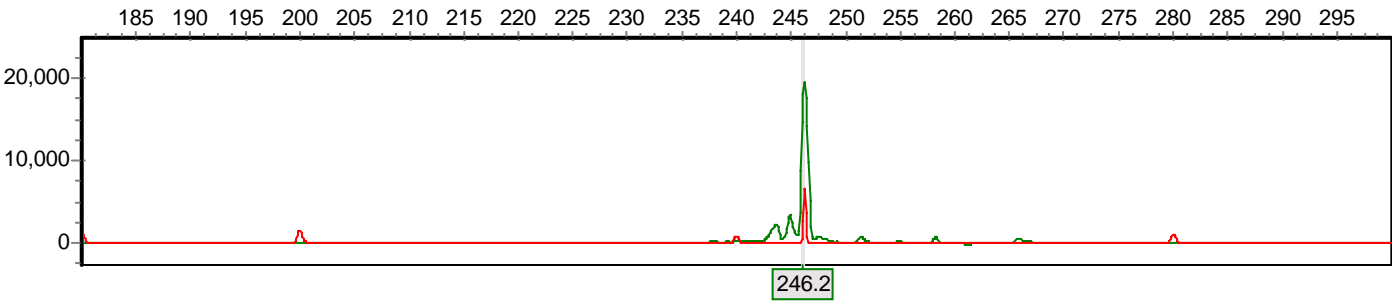

Sample 6: 06\_F01.fsa    Run date and time: 09/22/2017 - 15:09:09 -> 09/22/2017 - 15:52:49

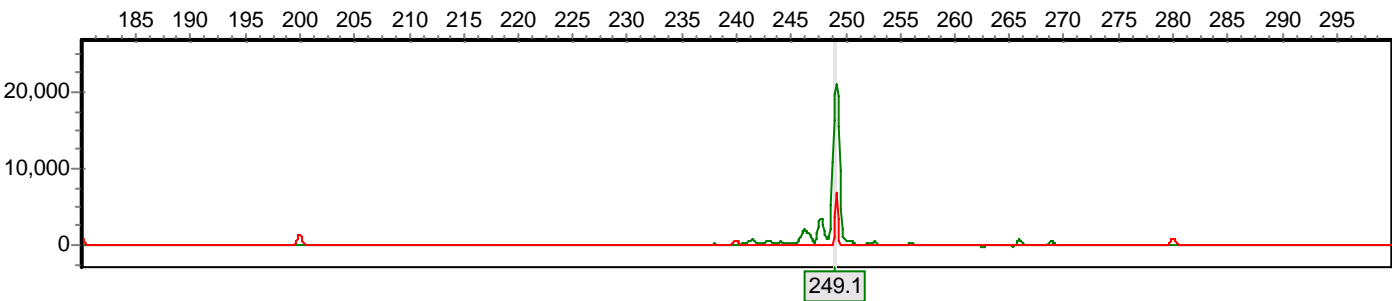

Sample 7: 07\_G01.fsa    Run date and time: 09/22/2017 - 15:09:09 -> 09/22/2017 - 15:52:49

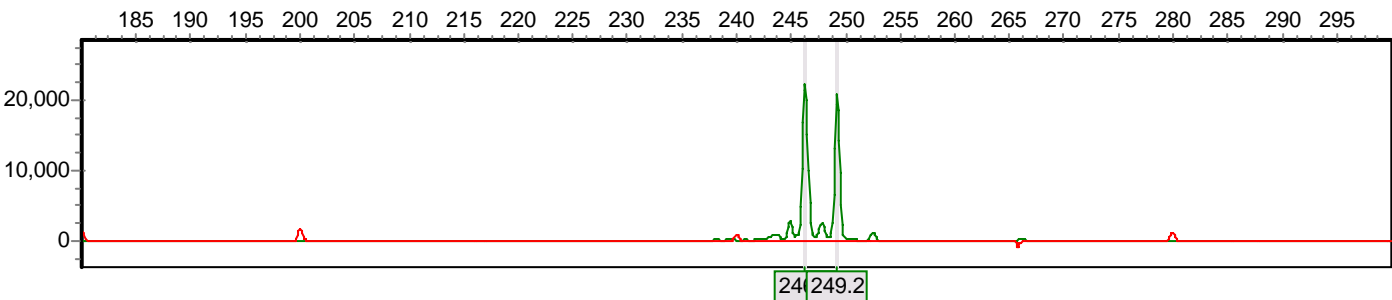

Sample 8: 08\_H01.fsa    Run date and time: 09/22/2017 - 15:09:09 -> 09/22/2017 - 15:52:49

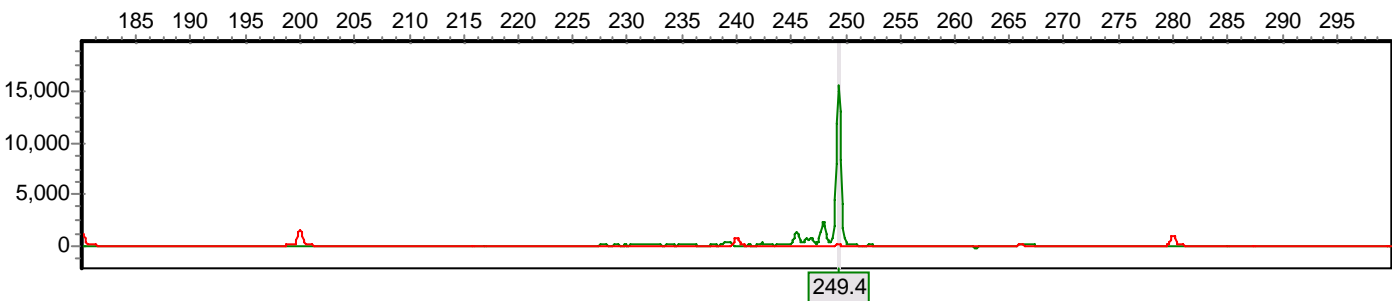

Sample 9: 09\_A02.fsa    Run date and time: 09/22/2017 - 15:09:09 -> 09/22/2017 - 15:52:49

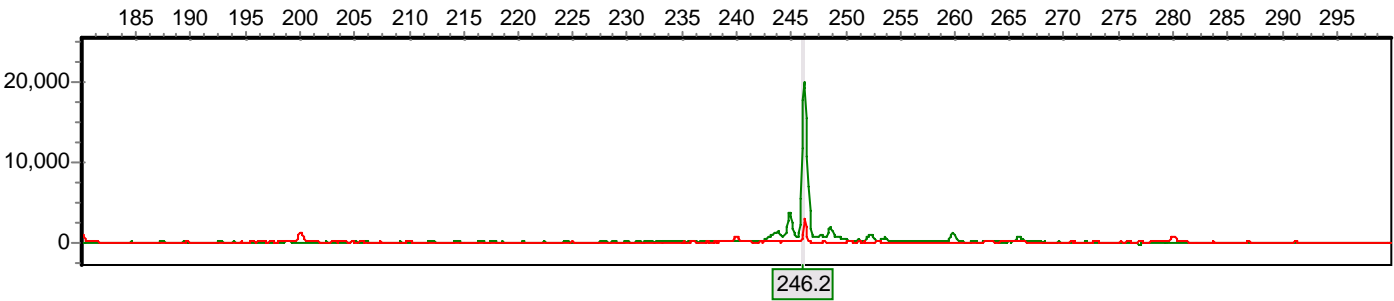

Sample 10: 10\_B02.fsa    Run date and time: 09/22/2017 - 15:09:09 -> 09/22/2017 - 15:52:49

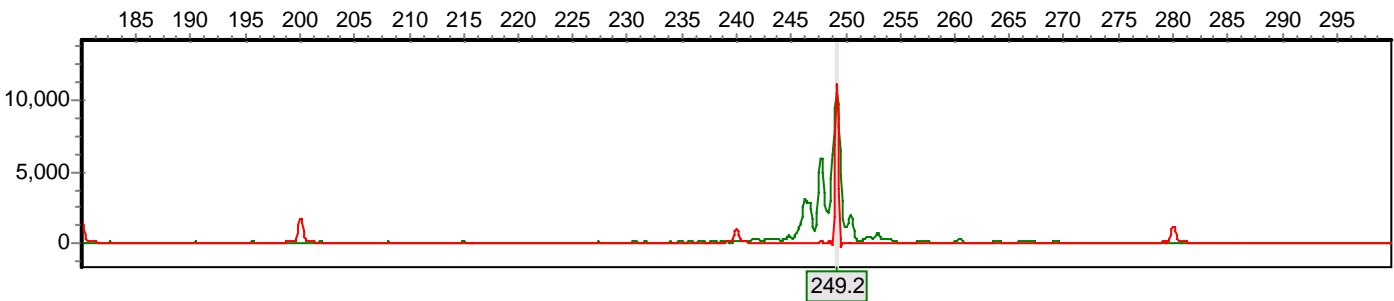

Sample 11: 11\_C02.fsa    Run date and time: 09/22/2017 - 15:09:09 -> 09/22/2017 - 15:52:49

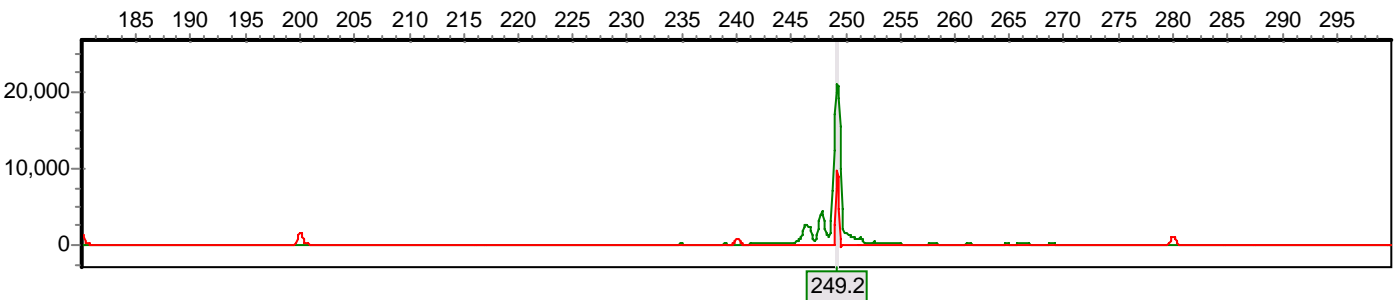

Sample 12: 12\_D02.fsa    Run date and time: 09/22/2017 - 15:09:09 -> 09/22/2017 - 15:52:49

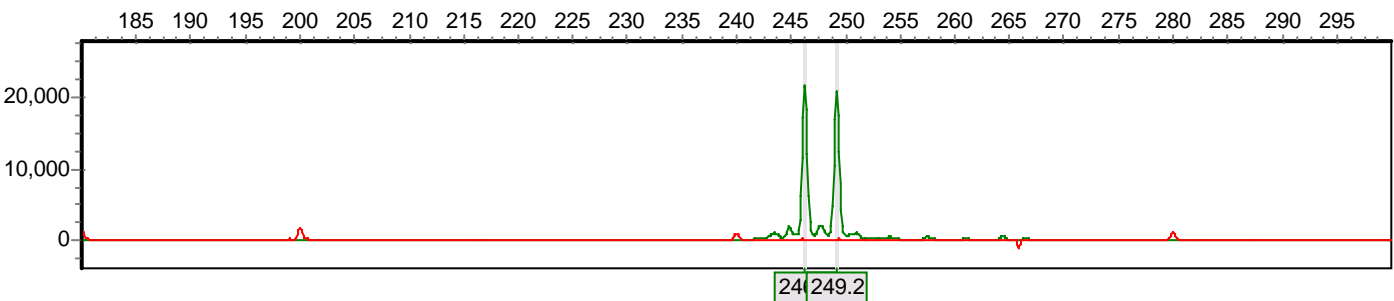

**Sample 13:** 13\_E02.fsa Run date and time: 09/22/2017 - 15:09:09 -> 09/22/2017 - 15:52:49

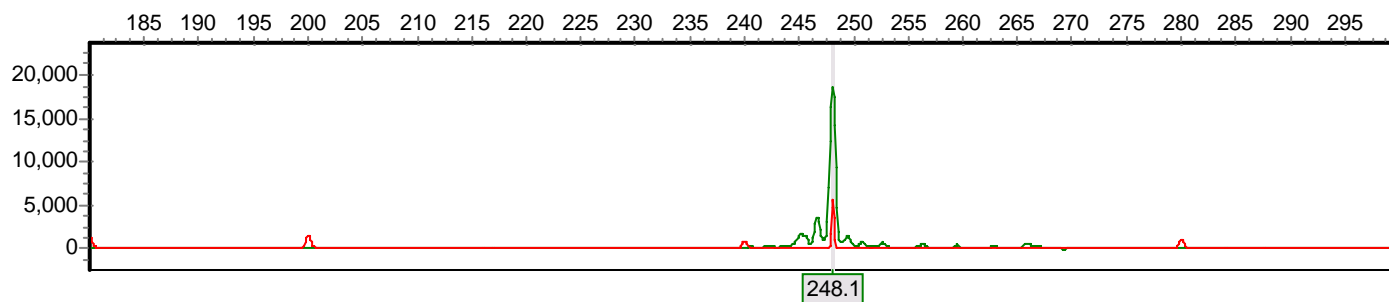

**Sample 14** 14\_F02.fsa Run date and time: 09/22/2017 - 15:09:09 -> 09/22/2017 - 15:52:49

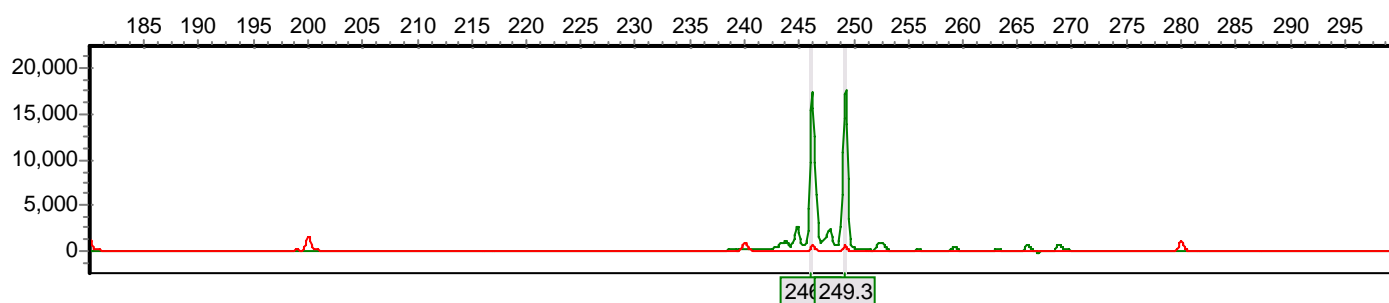

**Sample 15** 15\_G02.fsa Run date and time: 09/22/2017 - 15:09:09 -> 09/22/2017 - 15:52:49

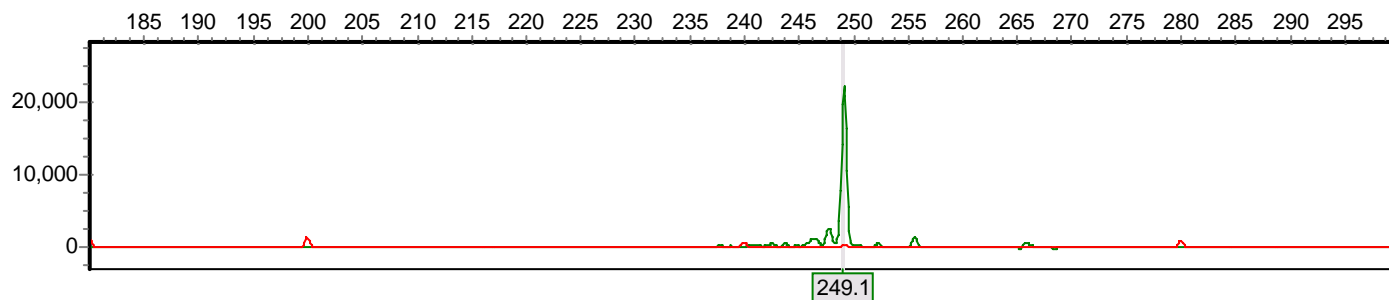

**Sample 16** 16\_H02.fsa Run date and time: 09/22/2017 - 15:09:09 -> 09/22/2017 - 15:52:49

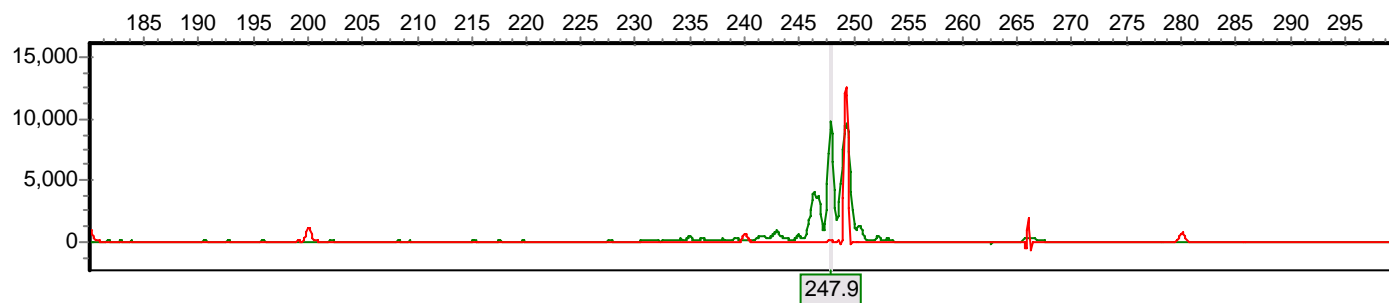

**Sample 17:** 17\_A03.fsa Run date and time: 09/22/2017 - 15:09:09 -> 09/22/2017 - 15:52:49

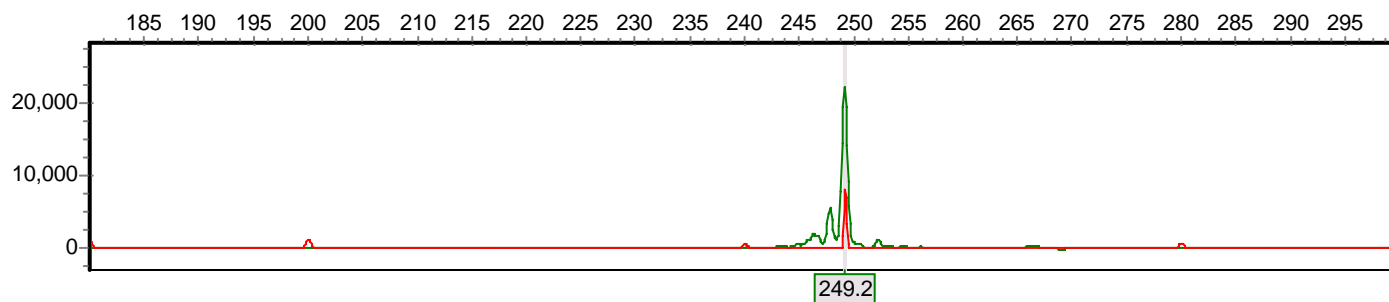

**Sample 18** 18\_B03.fsa Run date and time: 09/22/2017 - 15:09:09 -> 09/22/2017 - 15:52:49

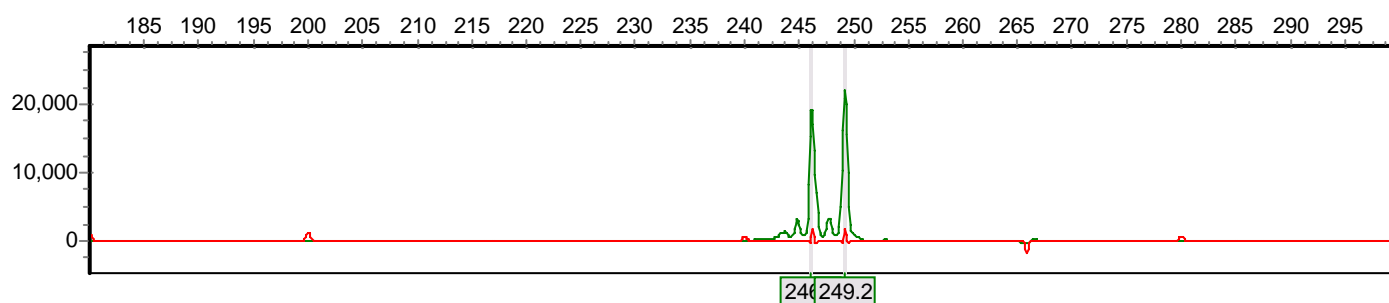

**Sample 19** 19\_C03.fsa Run date and time: 09/22/2017 - 15:09:09 -> 09/22/2017 - 15:52:49

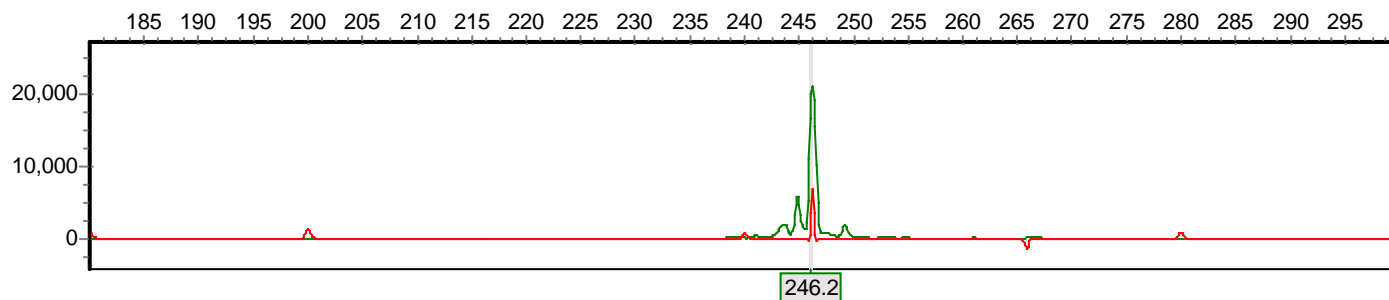

**Sample 20** 20\_D03.fsa Run date and time: 09/22/2017 - 15:09:09 -> 09/22/2017 - 15:52:49

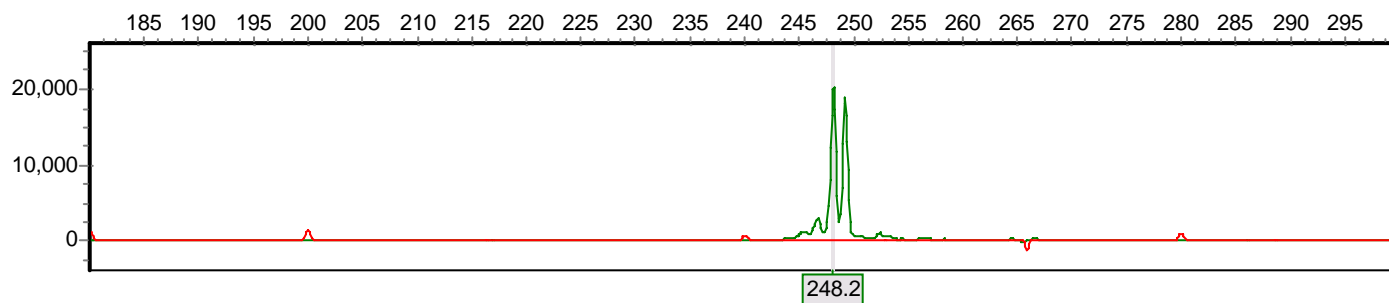

Sample 21: 21\_E03.fsa    Run date and time: 09/22/2017 - 15:09:09 -> 09/22/2017 - 15:52:49

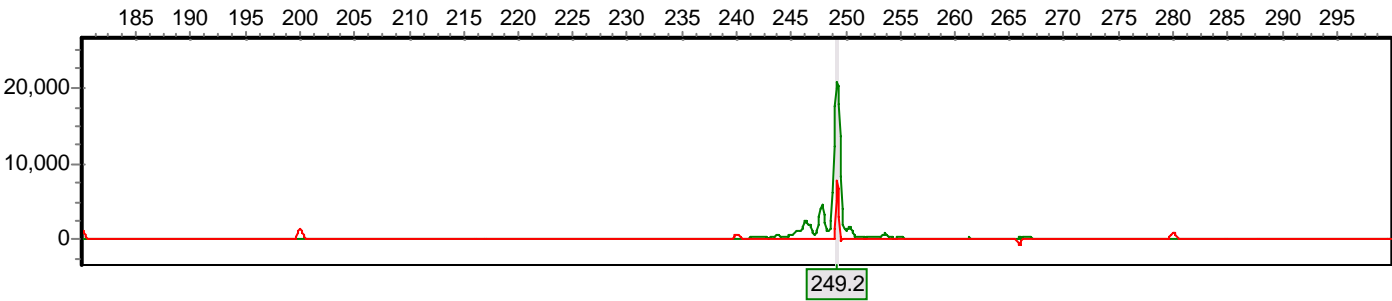

Sample 22: 222\_F03.fsa    Run date and time: 09/22/2017 - 15:09:09 -> 09/22/2017 - 15:52:49

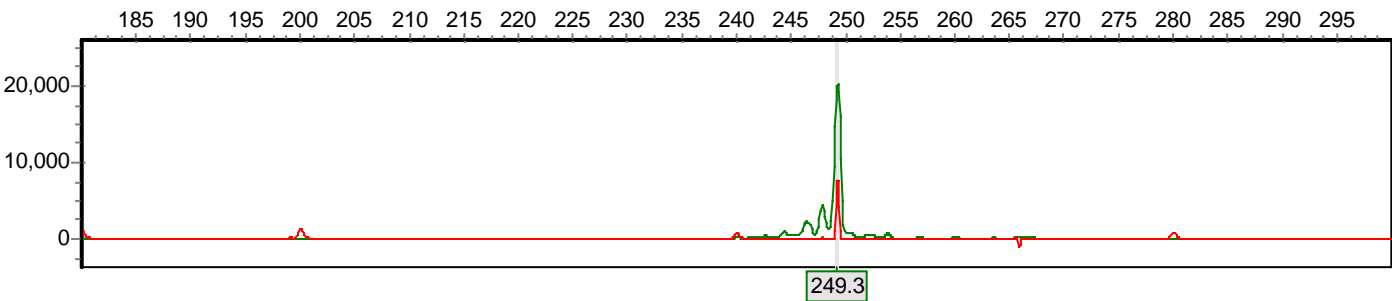

Sample 23: 233\_G03.fsa    Run date and time: 09/22/2017 - 15:09:09 -> 09/22/2017 - 15:52:49

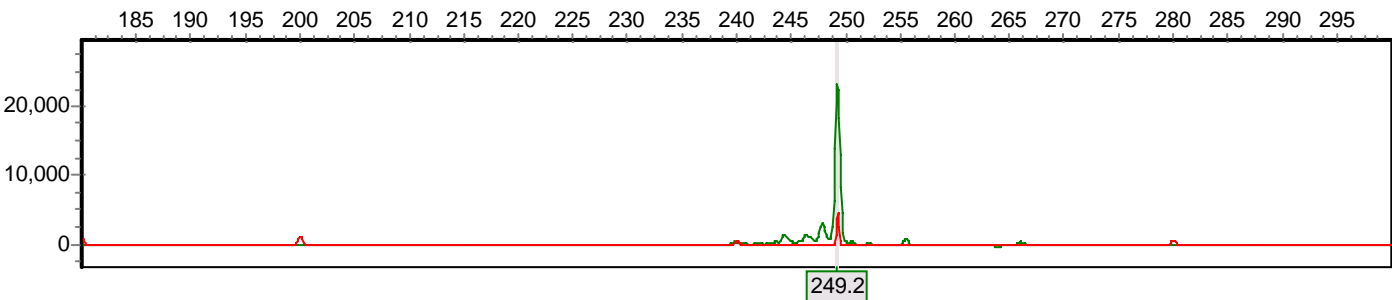

Sample 24: 244\_H03.fsa    Run date and time: 09/22/2017 - 15:09:09 -> 09/22/2017 - 15:52:49

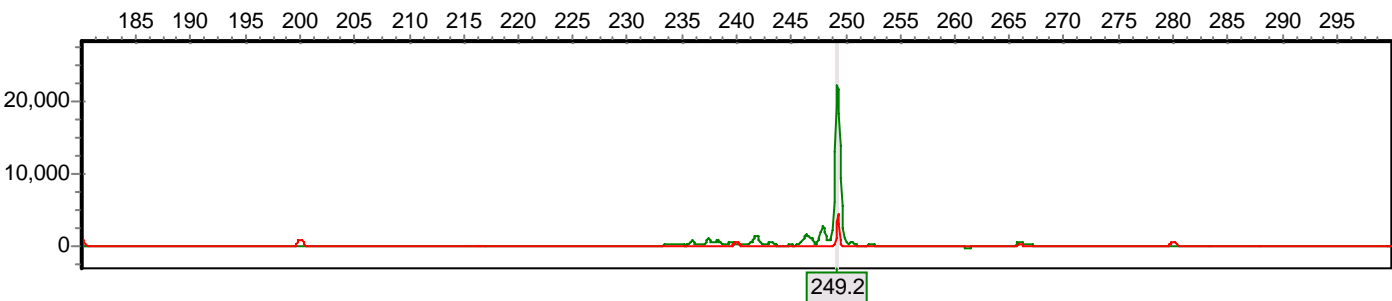

**Sample 25:** 25\_A04.fsa Run date and time: 09/22/2017 - 15:09:09 -> 09/22/2017 - 15:52:49

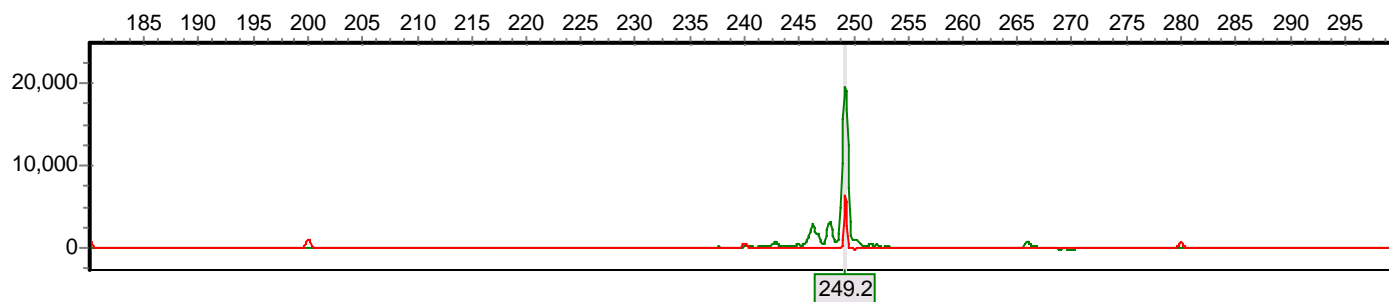

**Sample 26** 26\_B04.fsa Run date and time: 09/22/2017 - 15:09:09 -> 09/22/2017 - 15:52:49

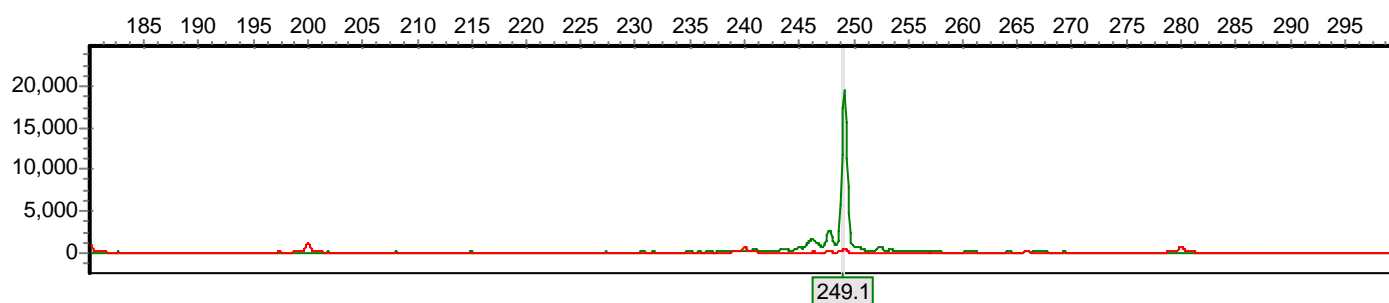

**Sample 27** 27\_C04.fsa Run date and time: 09/22/2017 - 15:09:09 -> 09/22/2017 - 15:52:49

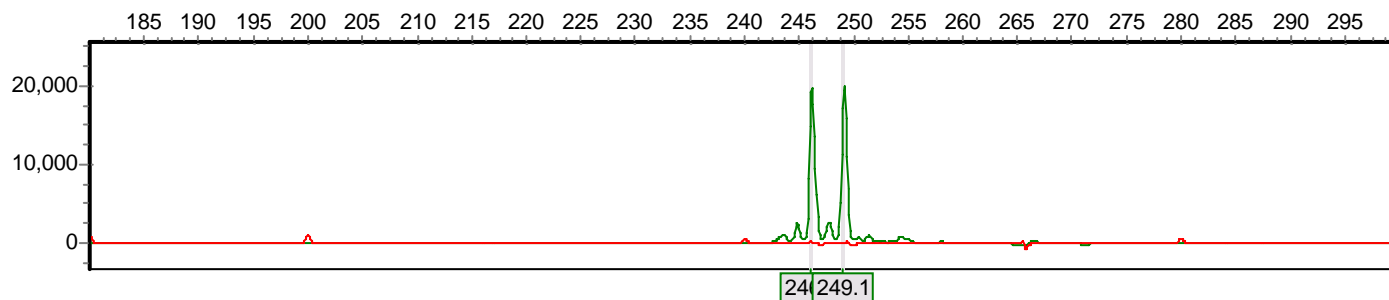

**Sample 28** 28\_D04.fsa Run date and time: 09/22/2017 - 15:09:09 -> 09/22/2017 - 15:52:49

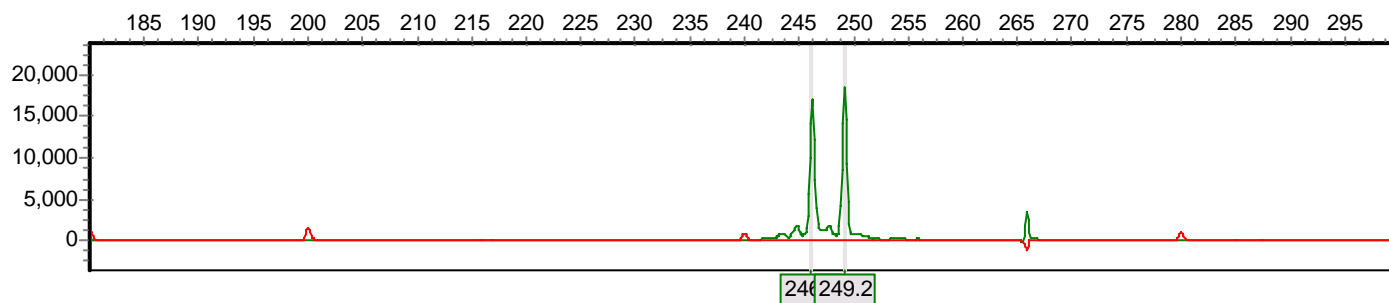

Sample 29: 29\_E04.fsa    Run date and time: 09/22/2017 - 15:09:09 -> 09/22/2017 - 15:52:49

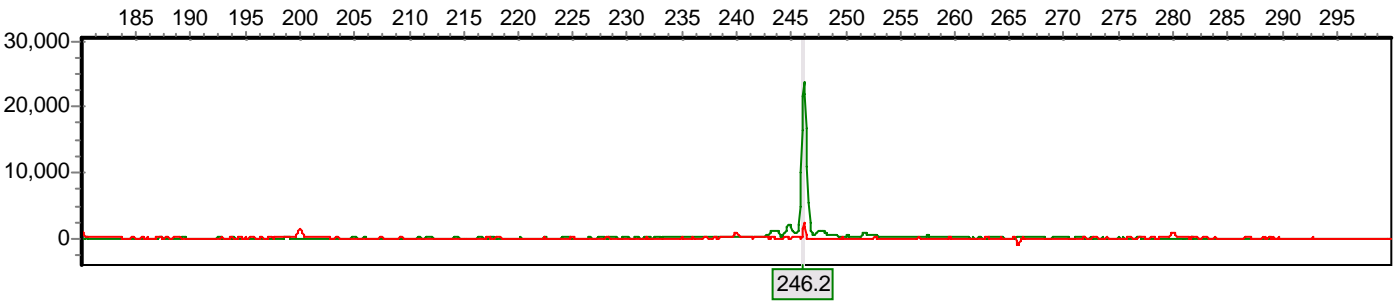

Sample 30: 30\_F04.fsa    Run date and time: 09/22/2017 - 15:09:09 -> 09/22/2017 - 15:52:49

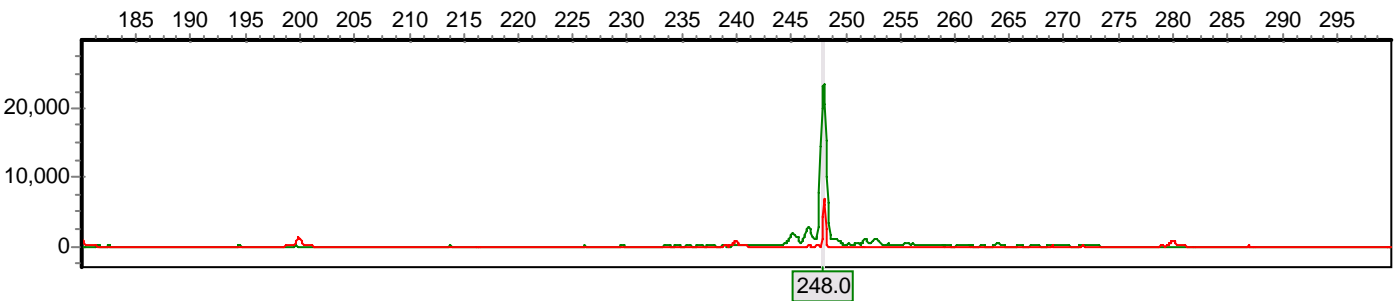

Sample 31: 31\_G04.fsa    Run date and time: 09/22/2017 - 15:09:09 -> 09/22/2017 - 15:52:49

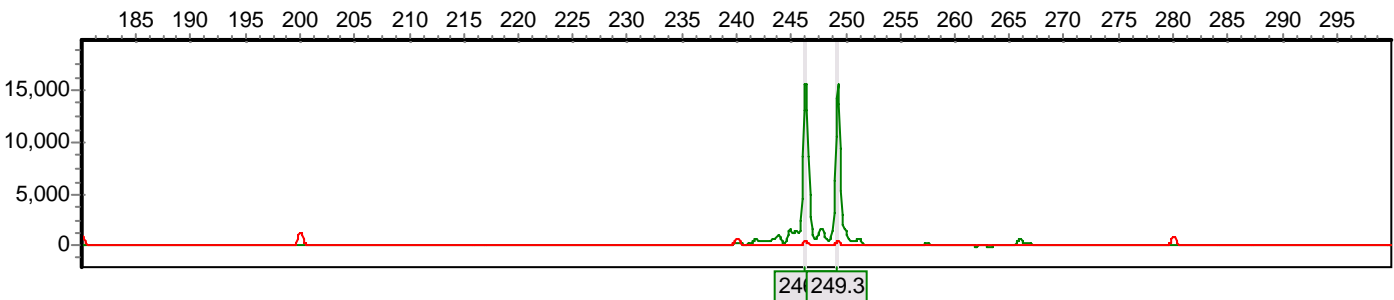

Sample 32: 32\_H04.fsa    Run date and time: 09/22/2017 - 15:09:09 -> 09/22/2017 - 15:52:49

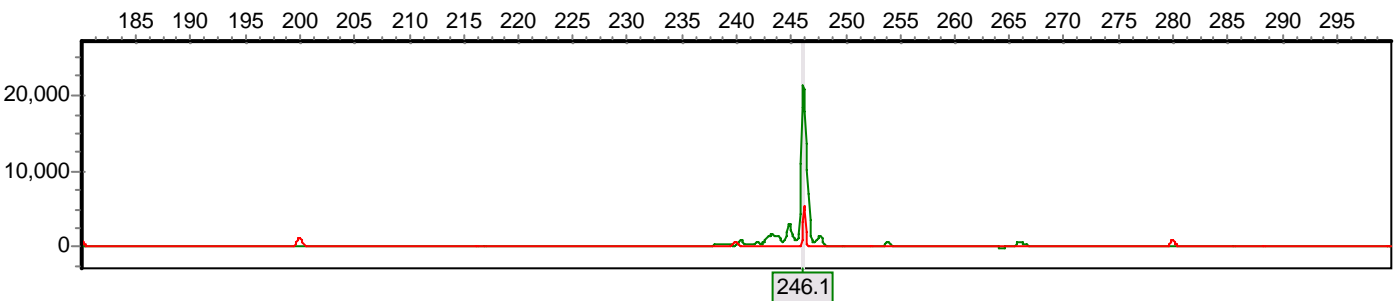



**Sample 33:** 33\_A05.fsa Run date and time: 09/22/2017 - 15:09:09 -> 09/22/2017 - 15:52:49

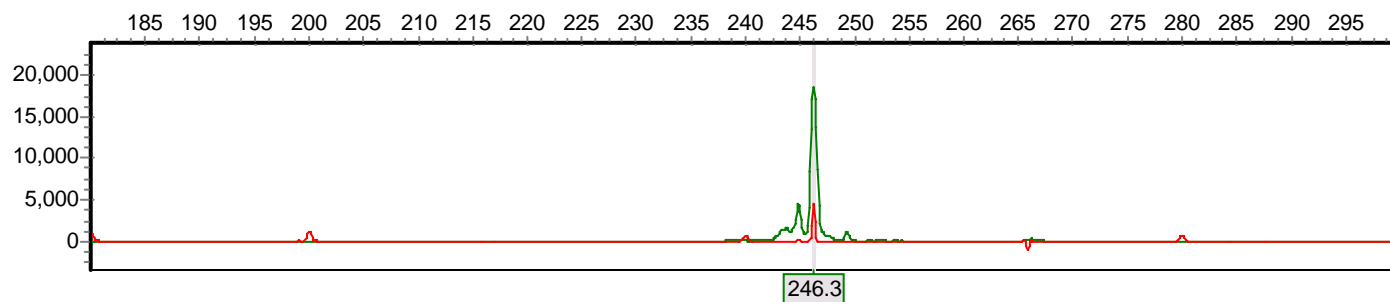

**Sample 34:** 34\_B05.fsa Run date and time: 09/22/2017 - 15:09:09 -> 09/22/2017 - 15:52:49

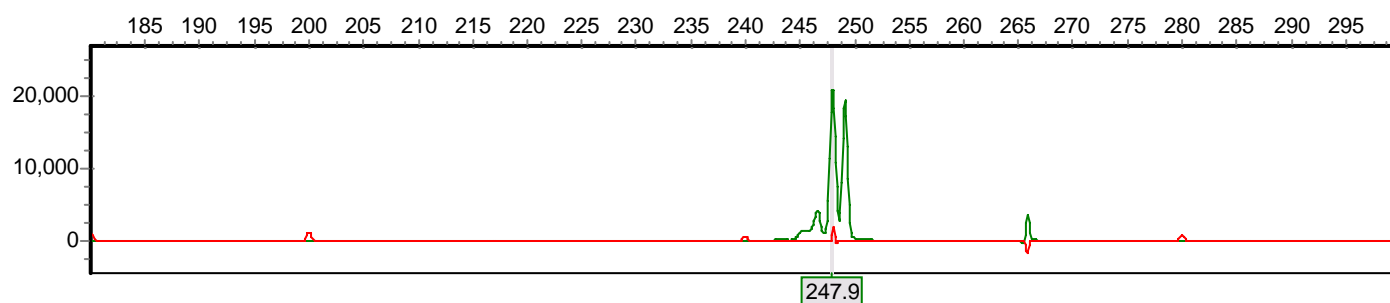

**Sample 35:** 35\_C05.fsa Run date and time: 09/22/2017 - 15:09:09 -> 09/22/2017 - 15:52:49

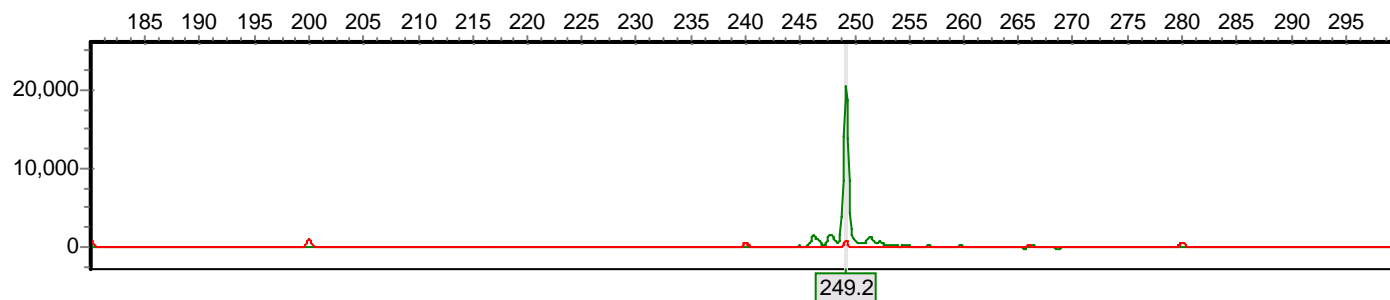

**Sample 36:** 36\_D05.fsa Run date and time: 09/22/2017 - 15:09:09 -> 09/22/2017 - 15:52:49

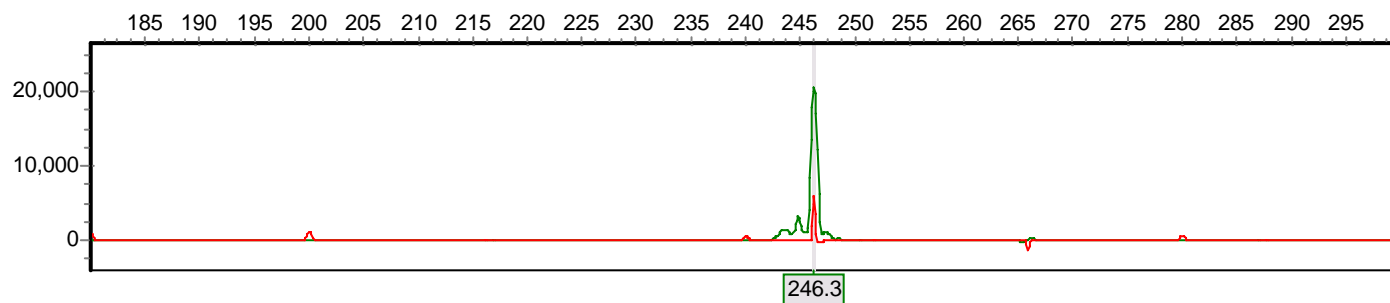

Sample 37: 37\_E05.fsa    Run date and time: 09/22/2017 - 15:09:09 -> 09/22/2017 - 15:52:49

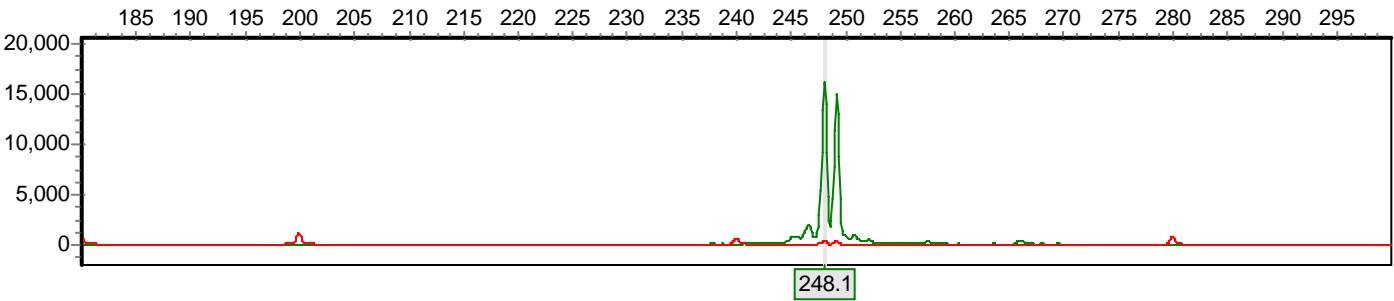

Sample 38 38\_F05.fsa    Run date and time: 09/22/2017 - 15:09:09 -> 09/22/2017 - 15:52:49

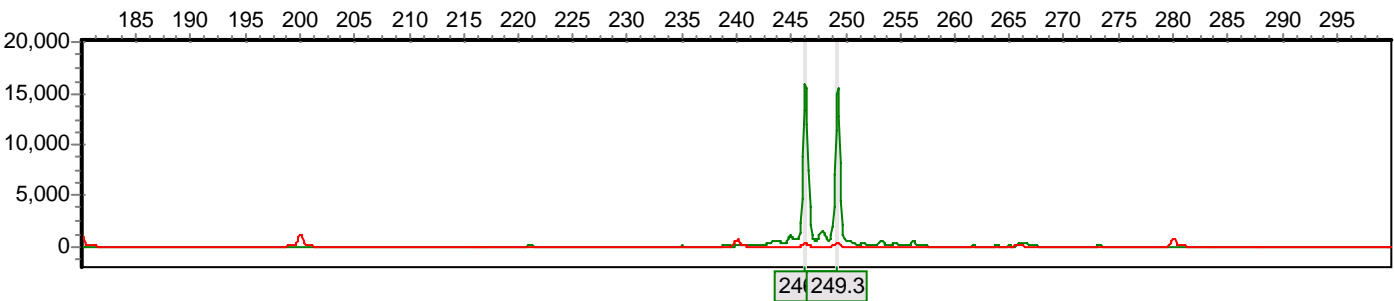

Sample 39 39\_G05.fsa    Run date and time: 09/22/2017 - 15:09:09 -> 09/22/2017 - 15:52:49

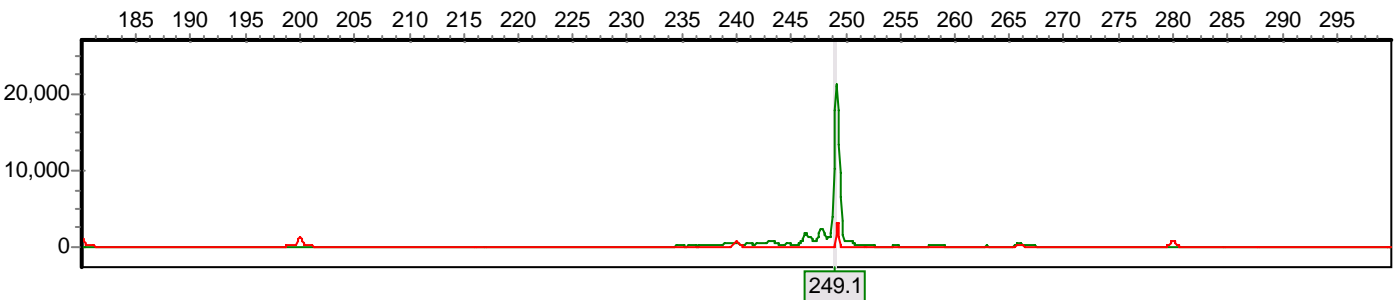

Sample 40 40\_H05.fsa    Run date and time: 09/22/2017 - 15:09:09 -> 09/22/2017 - 15:52:49

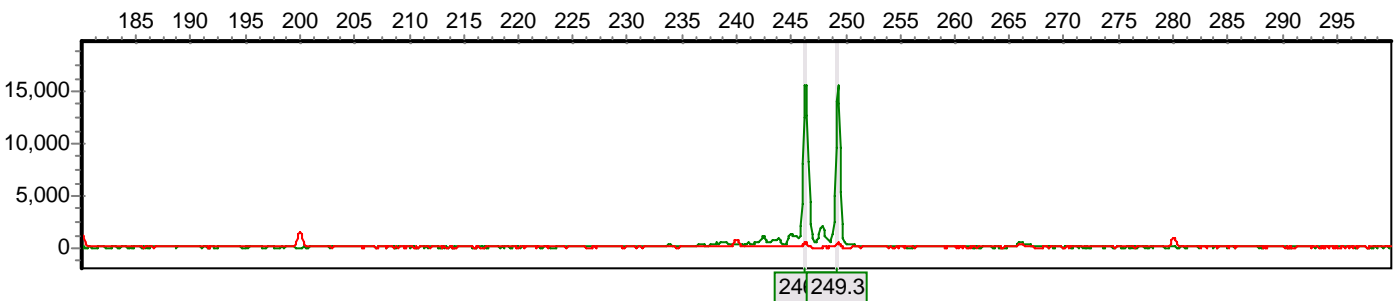

**Sample 41:** 41\_A06.fsa Run date and time: 09/22/2017 - 15:09:09 -> 09/22/2017 - 15:52:49

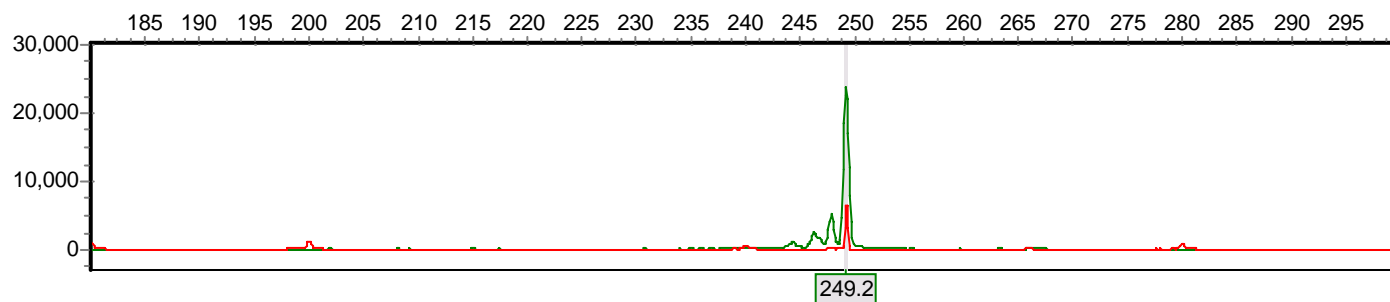

**Sample 42:** 42\_B06.fsa Run date and time: 09/22/2017 - 15:09:09 -> 09/22/2017 - 15:52:49

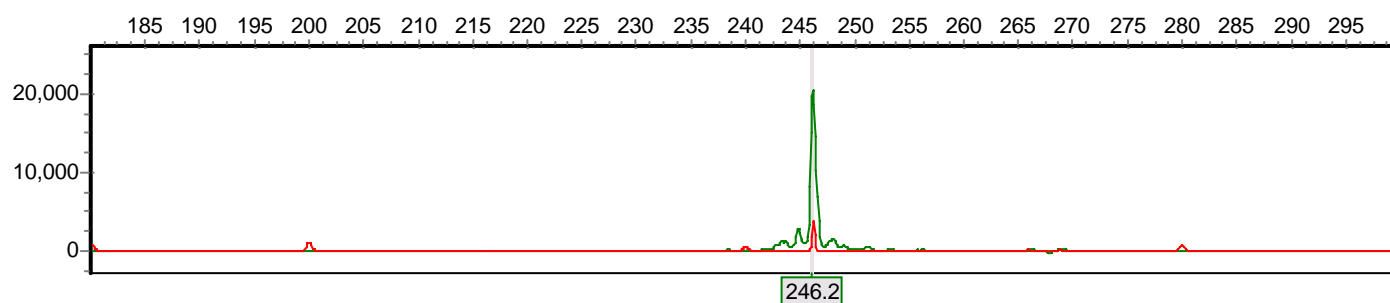

**Sample 43:** 43\_C06.fsa Run date and time: 09/22/2017 - 15:09:09 -> 09/22/2017 - 15:52:49

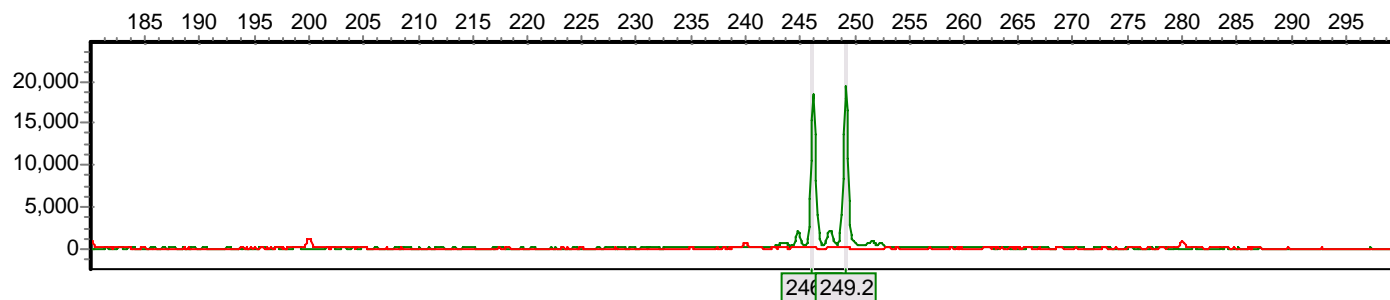

**Sample 44:** 44\_D06.fsa Run date and time: 09/22/2017 - 15:09:09 -> 09/22/2017 - 15:52:49

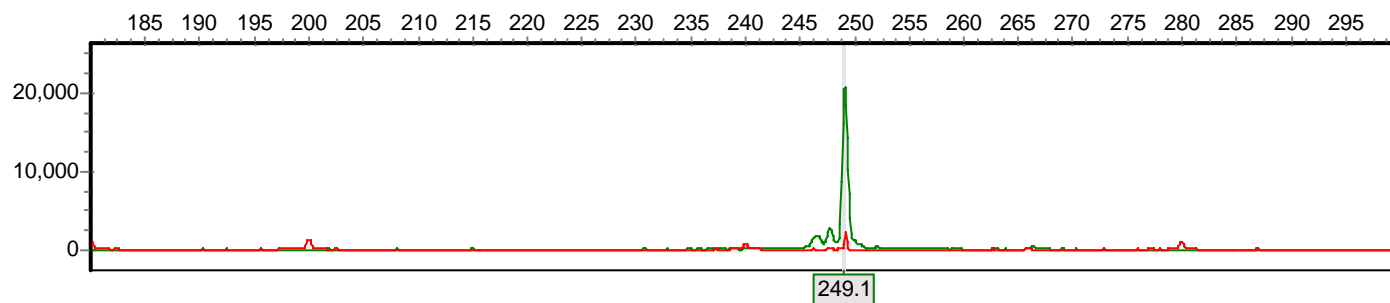

Sample 45: 45\_E06.fsa    Run date and time: 09/22/2017 - 15:09:09 -> 09/22/2017 - 15:52:49

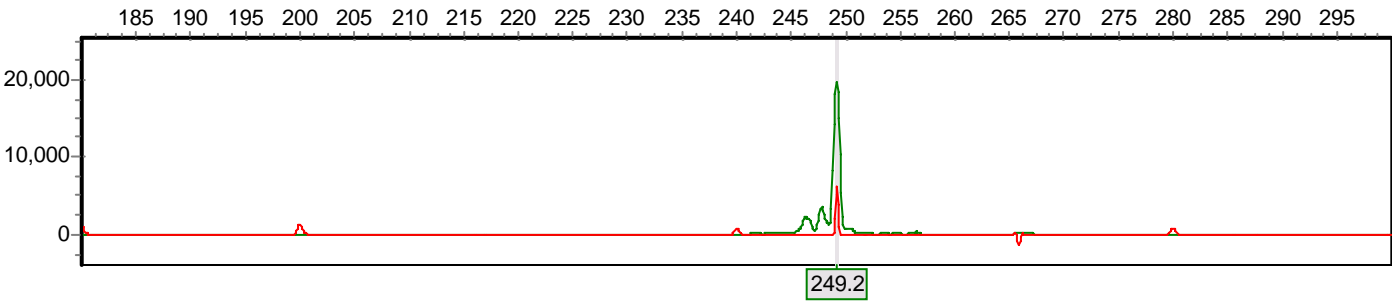

Sample 46: 46\_F06.fsa    Run date and time: 09/22/2017 - 15:09:09 -> 09/22/2017 - 15:52:49

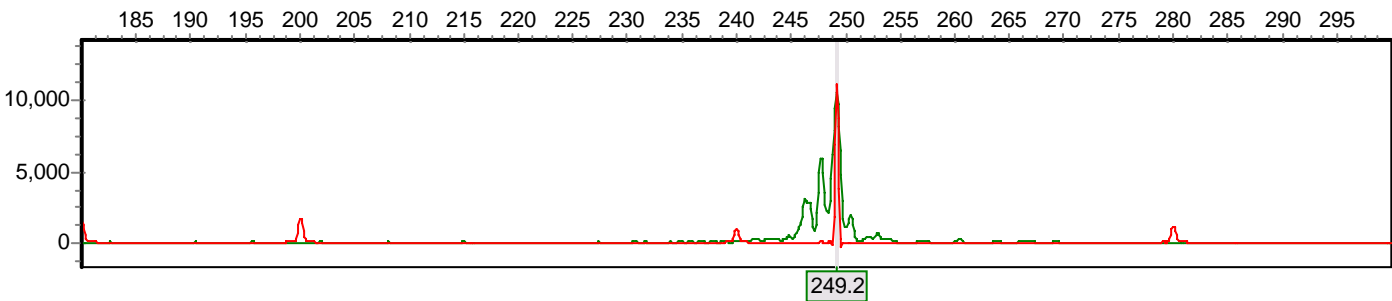

Sample 47: 47\_G06.fsa    Run date and time: 09/22/2017 - 15:09:09 -> 09/22/2017 - 15:52:49

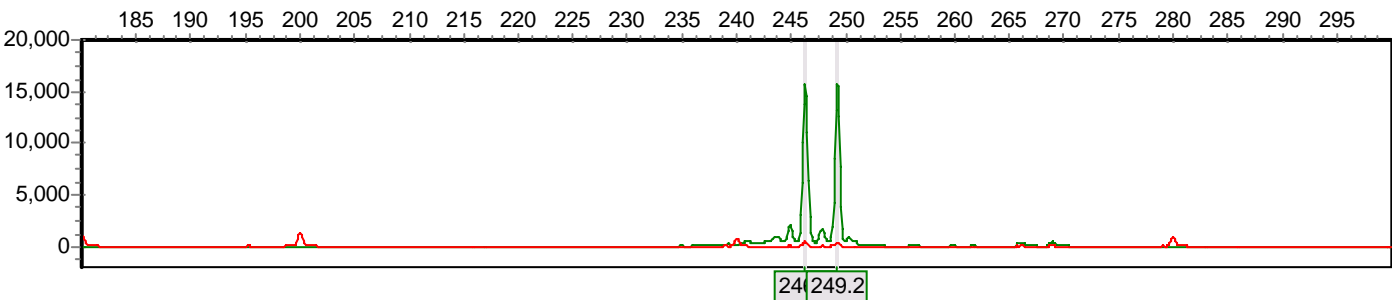

Sample 48: 48\_H06.fsa    Run date and time: 09/22/2017 - 15:09:09 -> 09/22/2017 - 15:52:49

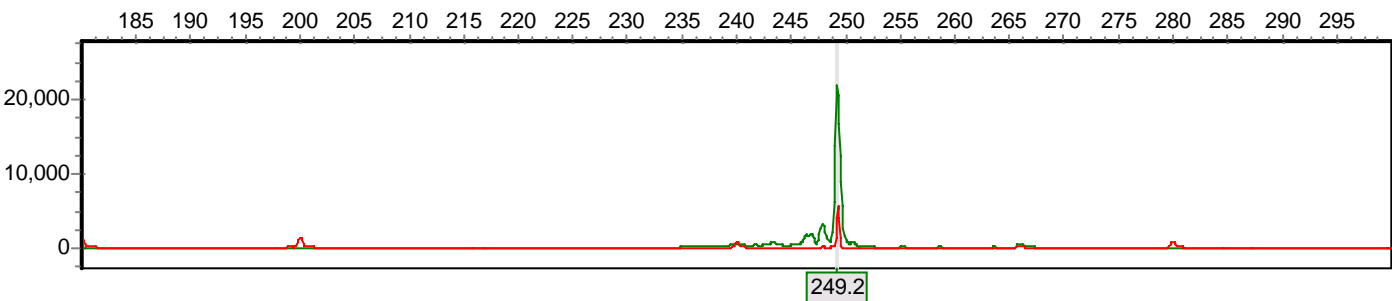

**Sample 49:** 49\_A07.fsa Run date and time: 09/22/2017 - 15:09:09 -> 09/22/2017 - 15:52:49

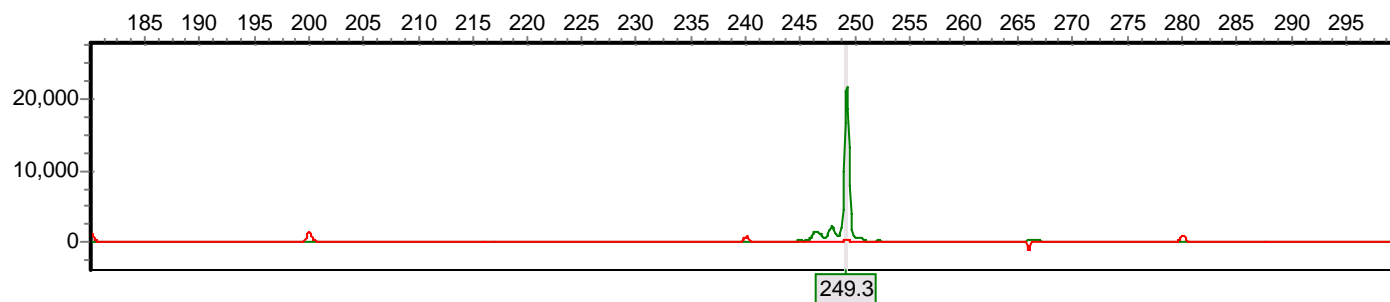

**Sample 5050\_B07.fsa** Run date and time: 09/22/2017 - 15:09:09 -> 09/22/2017 - 15:52:49

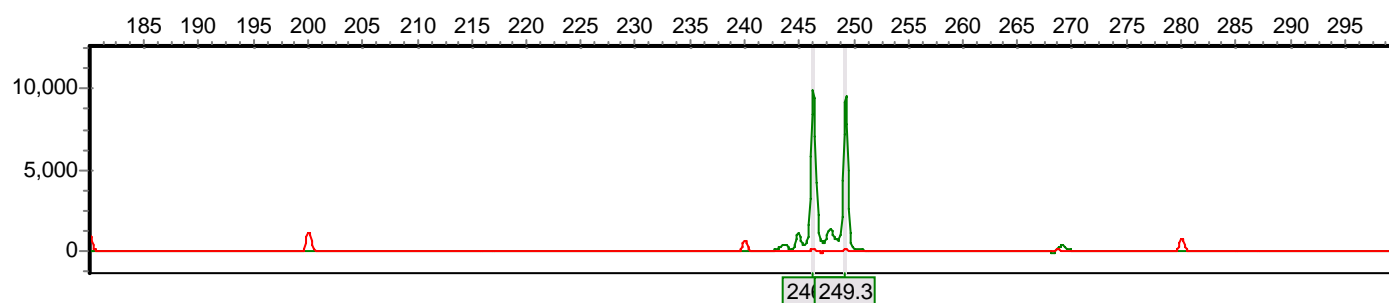

**Sample 5151\_C07.fsa** Run date and time: 09/22/2017 - 15:09:09 -> 09/22/2017 - 15:52:49

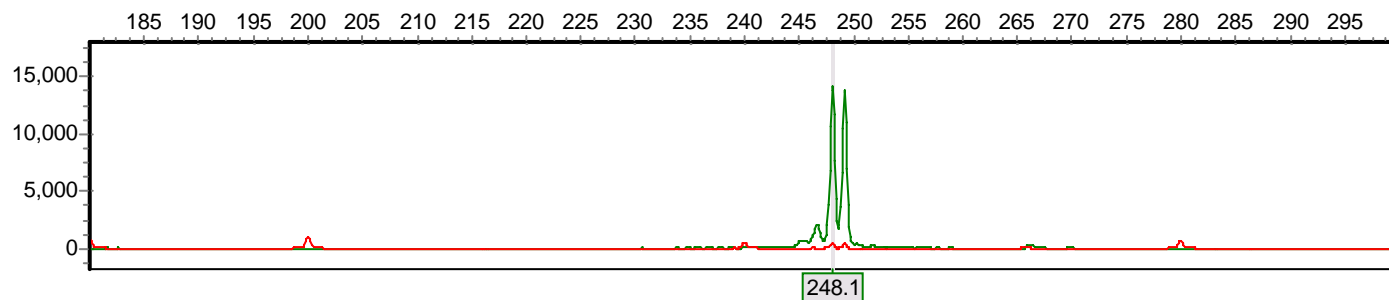

**Sample 5252\_D07.fsa** Run date and time: 09/22/2017 - 15:09:09 -> 09/22/2017 - 15:52:49

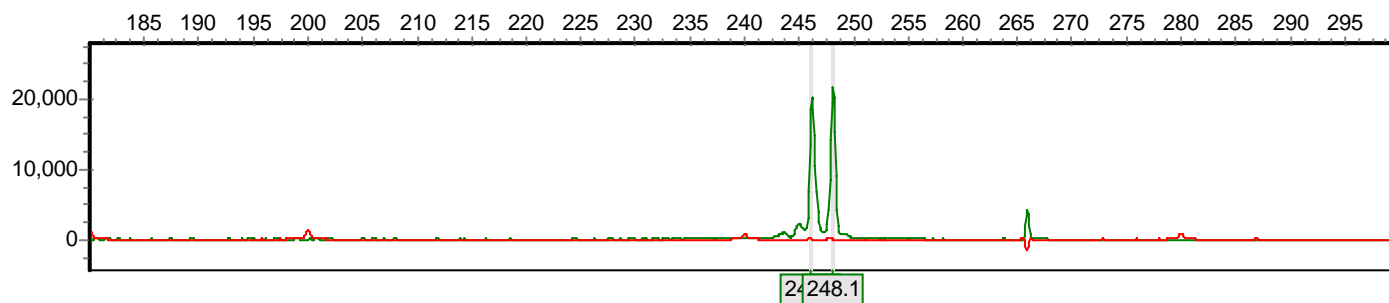

Sample 53: 53\_E07.fsa    Run date and time: 09/22/2017 - 15:09:09 -> 09/22/2017 - 15:52:49

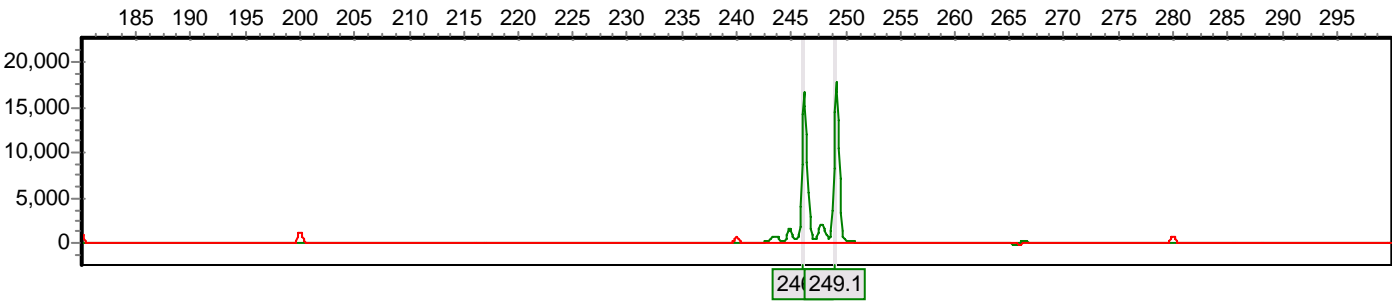

Supplement: s1 [file s1]
