# Supplementary material
Source: MDPI journal article supplement (https://www.mdpi.com/1999-4907/10/3/225)

Sample 1: 49\_A07.fsa    Run date and time: 01/05/2017 - 08:54:22 -> 01/05/2017 - 09:38:13

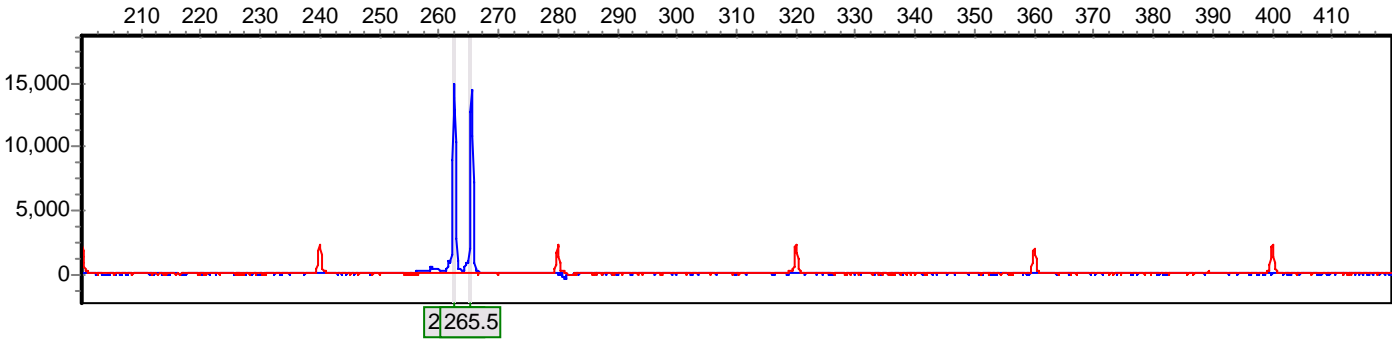

Sample 2: 50\_B07.fsa    Run date and time: 01/05/2017 - 08:54:22 -> 01/05/2017 - 09:38:13

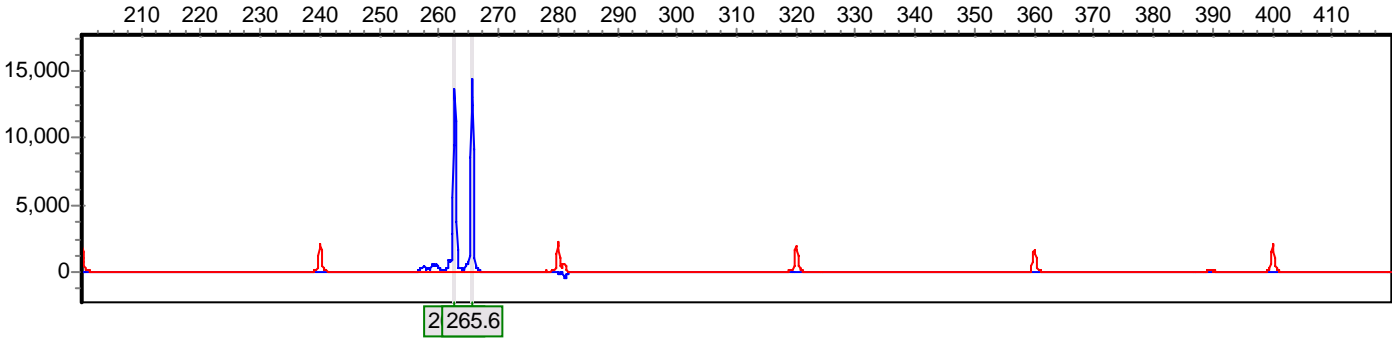

Sample 3: 51\_C07.fsa    Run date and time: 01/05/2017 - 08:54:22 -> 01/05/2017 - 09:38:13

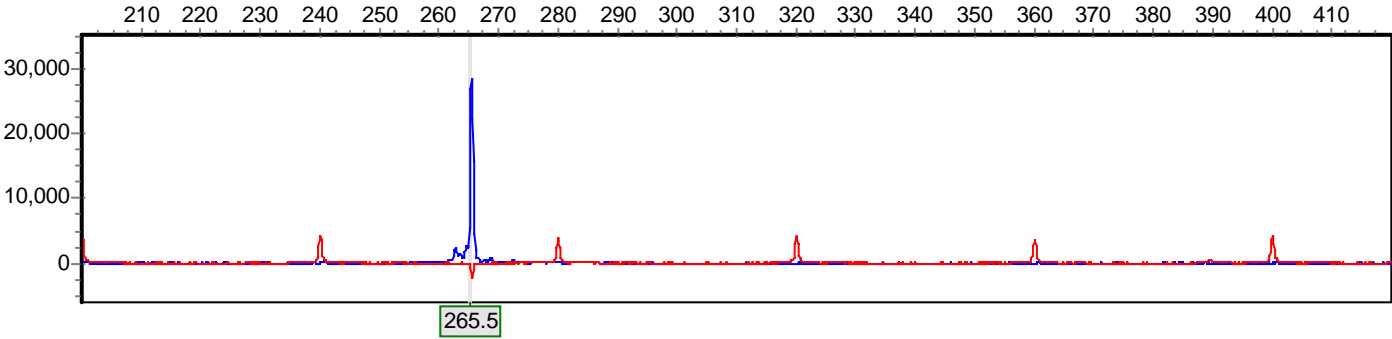

Sample 4: 52\_D07.fsa    Run date and time: 01/05/2017 - 08:54:22 -> 01/05/2017 - 09:38:13

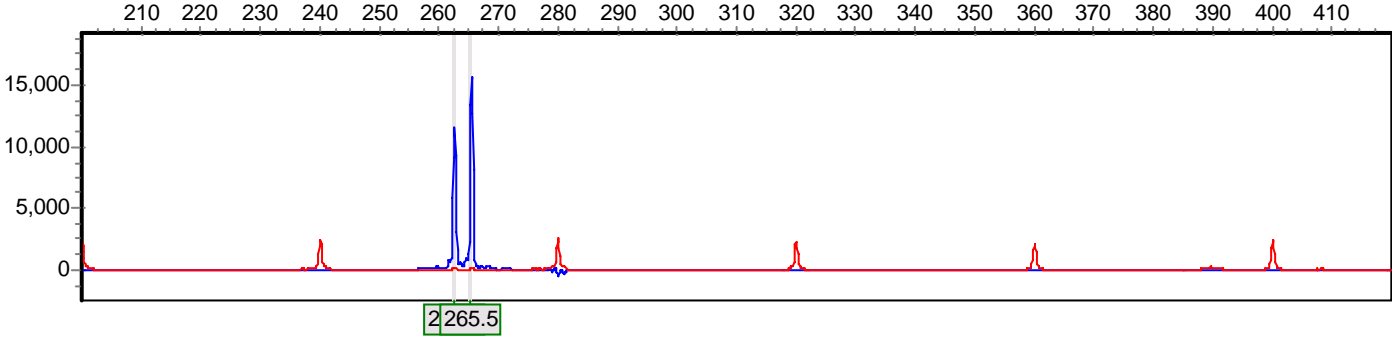

**Sample 5:** 53\_E07.fsa Run date and time: 01/05/2017 - 08:54:22 -> 01/05/2017 - 09:38:13

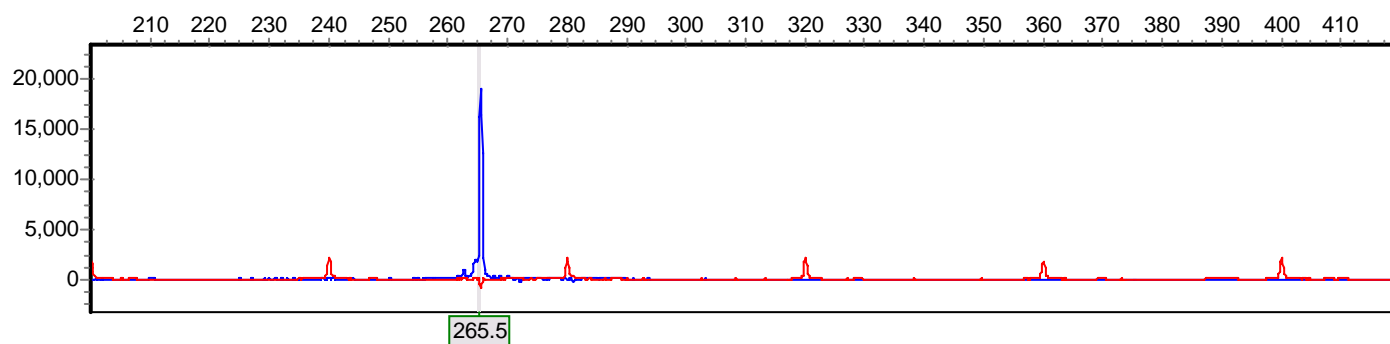

**Sample 6:** 54\_F07.fsa Run date and time: 01/05/2017 - 08:54:22 -> 01/05/2017 - 09:38:13

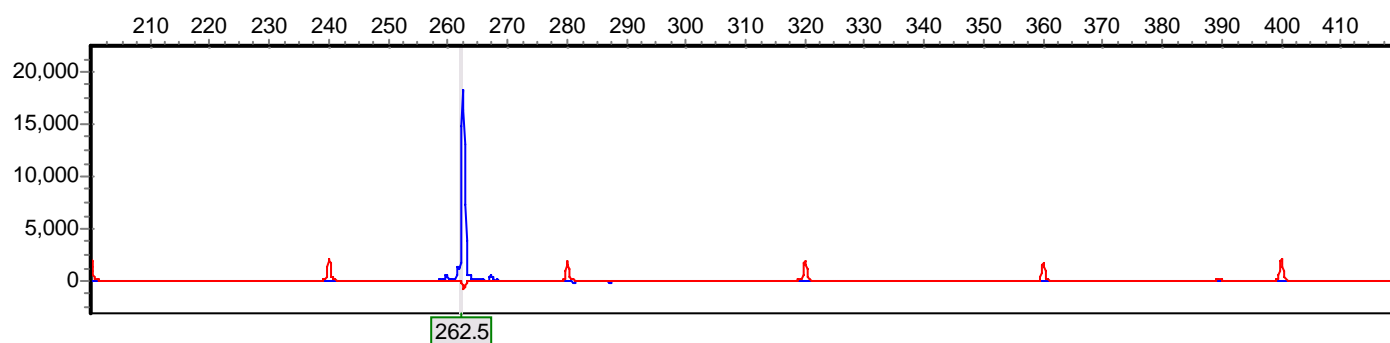

**Sample 7:** 55\_G07.fsa Run date and time: 01/05/2017 - 08:54:22 -> 01/05/2017 - 09:38:13

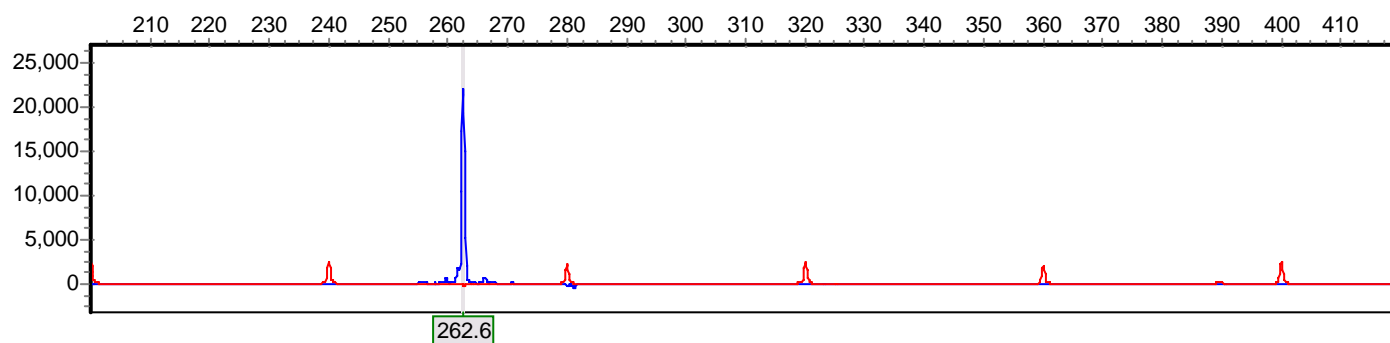

**Sample 8:** 56\_H07.fsa Run date and time: 01/05/2017 - 08:54:22 -> 01/05/2017 - 09:38:13

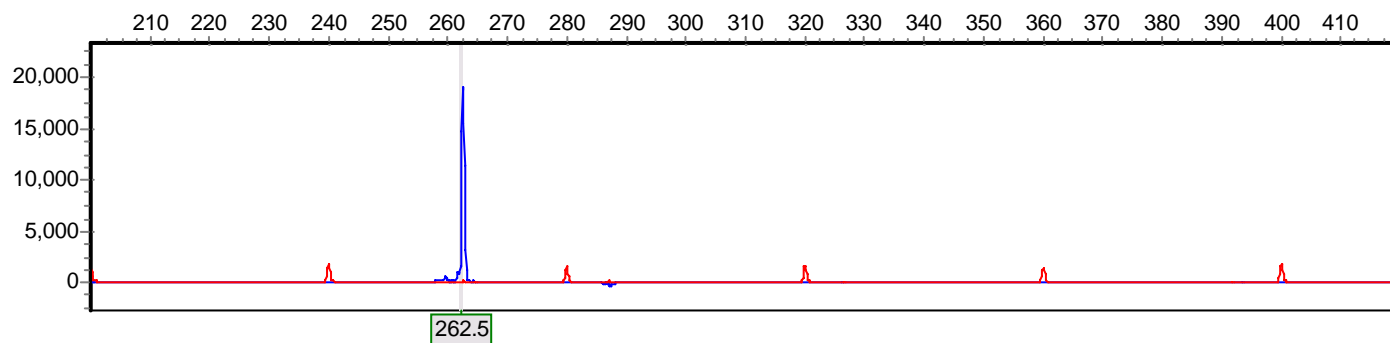

Sample 9: 57\_A08.fsa    Run date and time: 01/05/2017 - 08:54:22 -> 01/05/2017 - 09:38:13

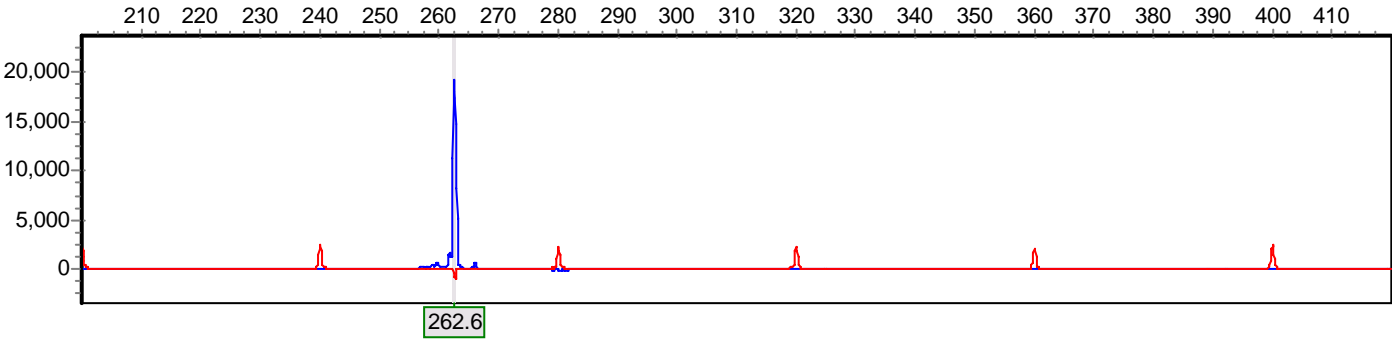

Sample 1058\_B08.fsa    Run date and time: 01/05/2017 - 08:54:22 -> 01/05/2017 - 09:38:13

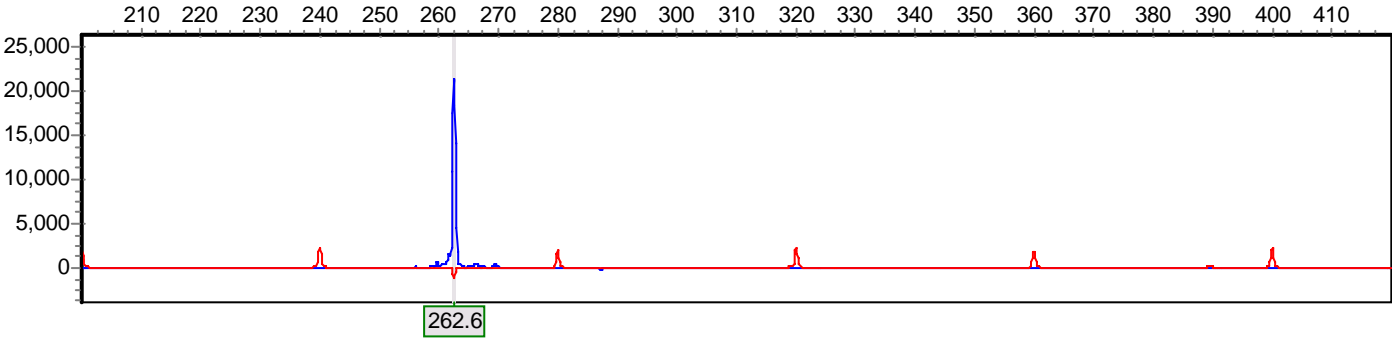

Sample 1159\_C08.fsa    Run date and time: 01/05/2017 - 08:54:22 -> 01/05/2017 - 09:38:13

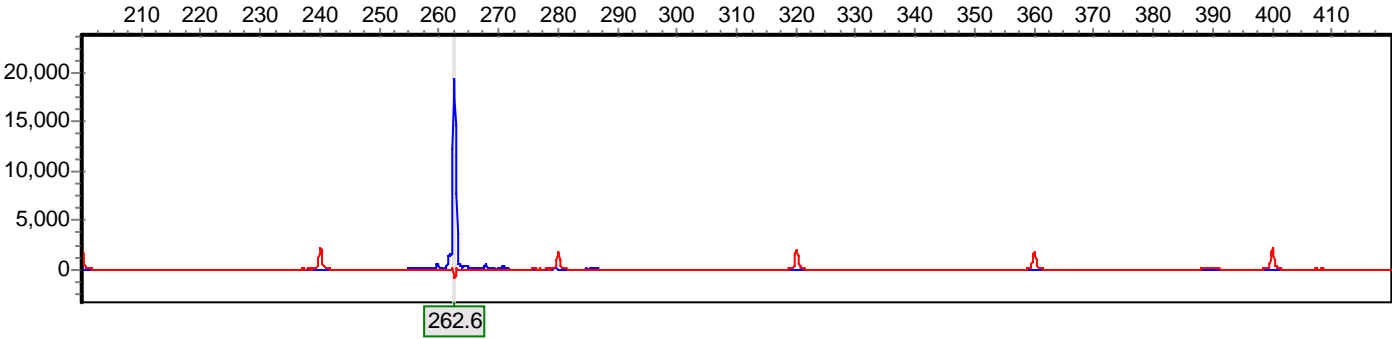

Sample 1260\_D08.fsa    Run date and time: 01/05/2017 - 08:54:22 -> 01/05/2017 - 09:38:13

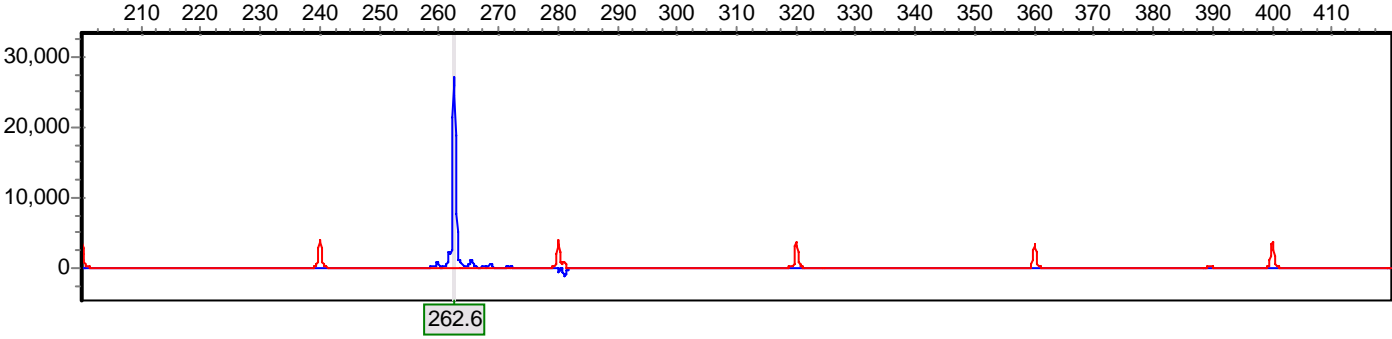

**Sample 13:** 61\_E08.fsa Run date and time: 01/05/2017 - 08:54:22 -> 01/05/2017 - 09:38:13

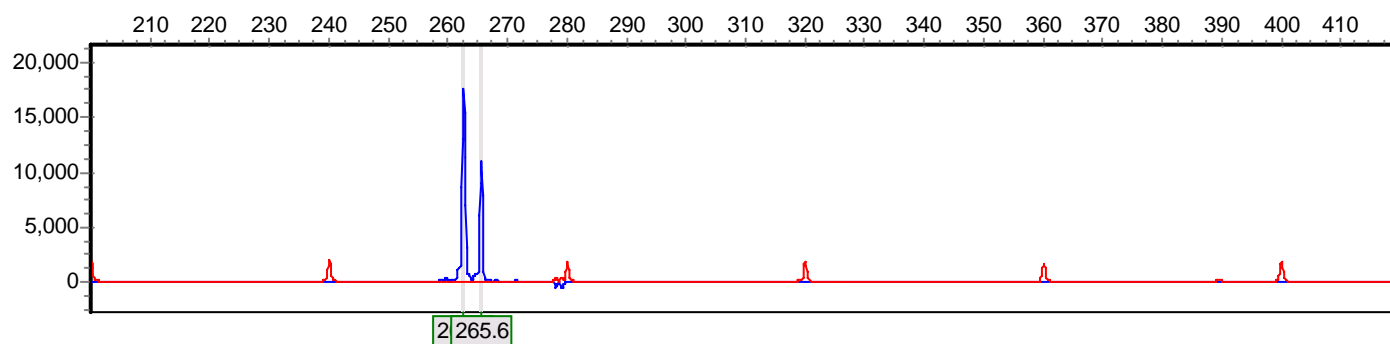

**Sample 14:** 62\_F08.fsa Run date and time: 01/05/2017 - 08:54:22 -> 01/05/2017 - 09:38:13

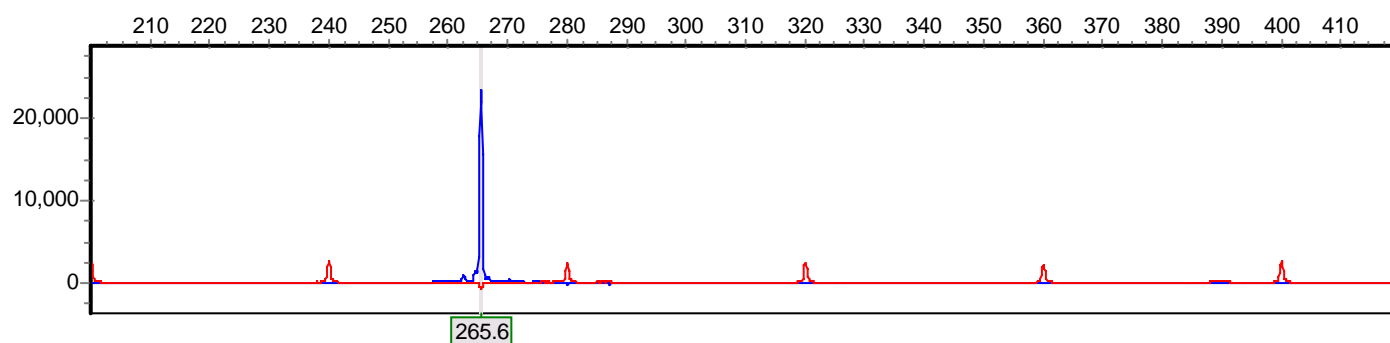

**Sample 15:** 63\_G08.fsa Run date and time: 01/05/2017 - 08:54:22 -> 01/05/2017 - 09:38:13

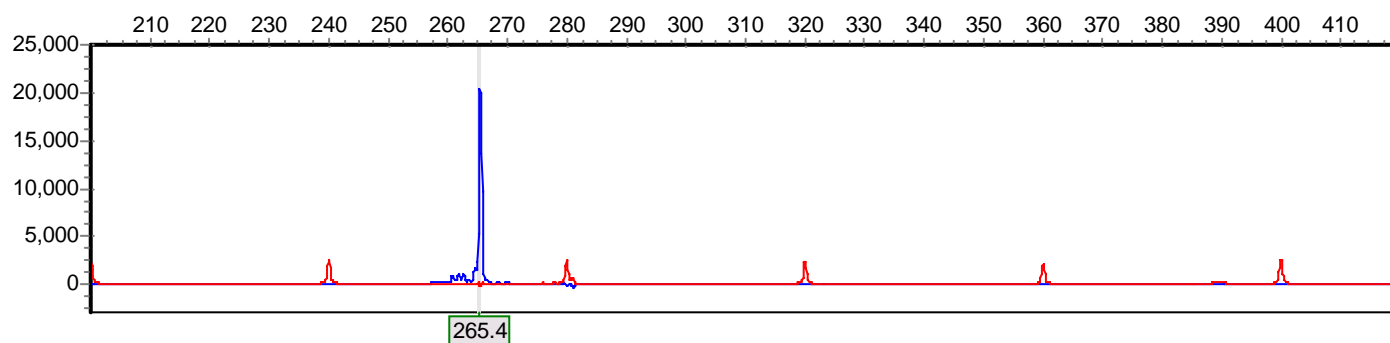

**Sample 16:** 64\_H08.fsa Run date and time: 01/05/2017 - 08:54:22 -> 01/05/2017 - 09:38:13

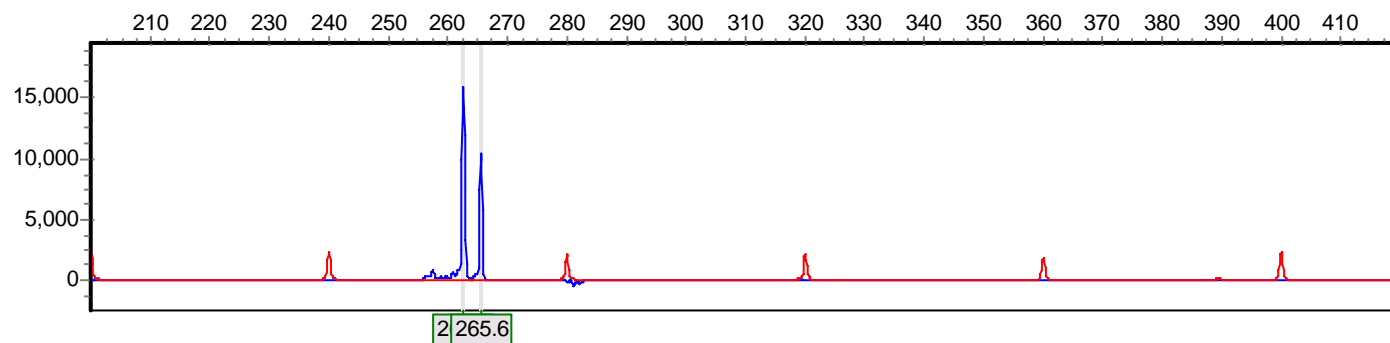

**Sample 17:** 65\_A09.fsa Run date and time: 01/05/2017 - 08:54:22 -> 01/05/2017 - 09:38:13

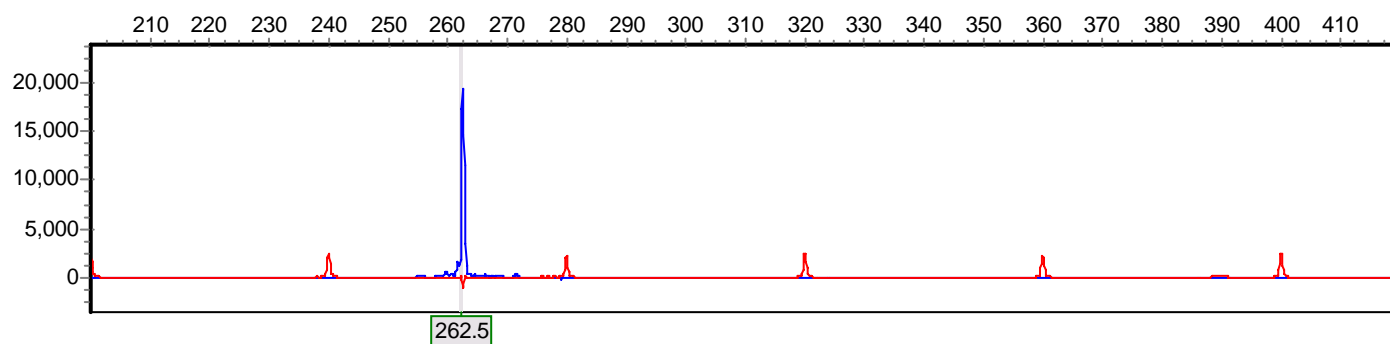

**Sample 18**66\_B09.fsa Run date and time: 01/05/2017 - 08:54:22 -> 01/05/2017 - 09:38:13

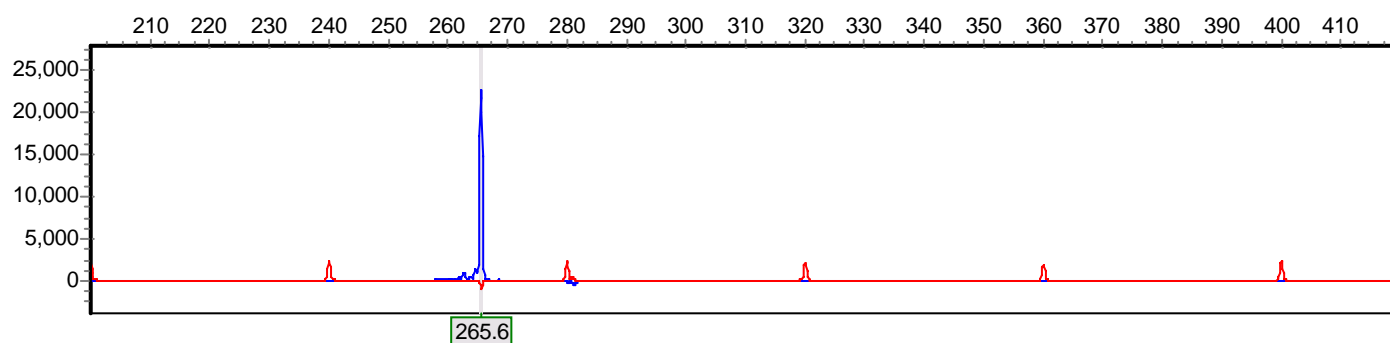

**Sample 19**67\_C09.fsa Run date and time: 01/05/2017 - 08:54:22 -> 01/05/2017 - 09:38:13

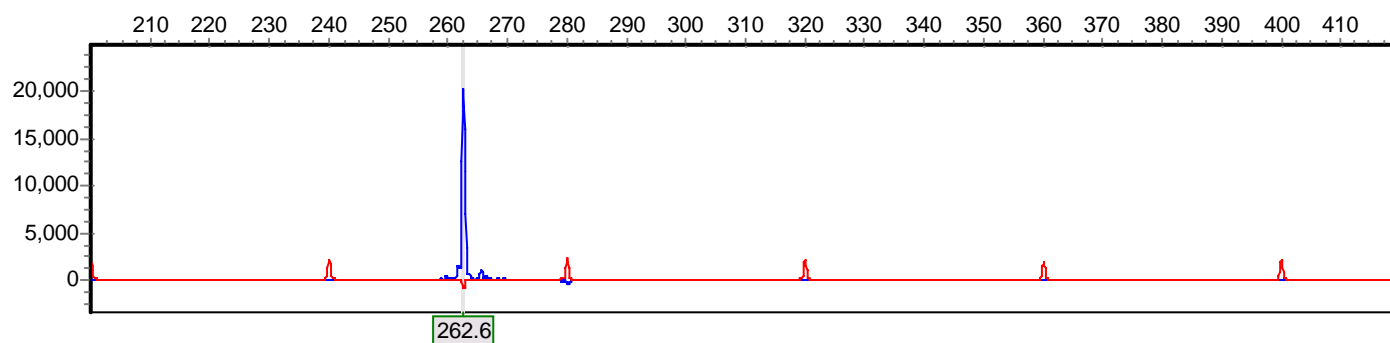

**Sample 20**68\_D09.fsa Run date and time: 01/05/2017 - 08:54:22 -> 01/05/2017 - 09:38:13

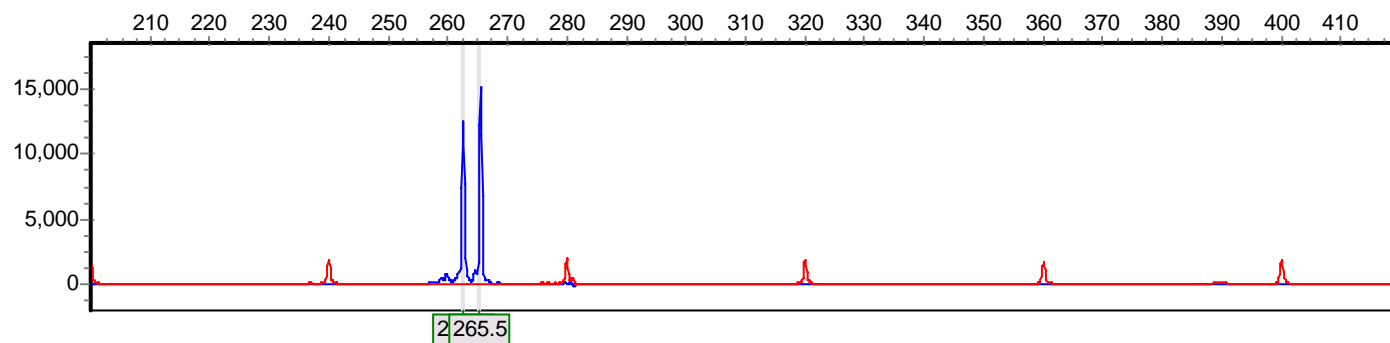

**Sample 21:** 69\_E09.fsa Run date and time: 01/05/2017 - 08:54:22 -> 01/05/2017 - 09:38:13

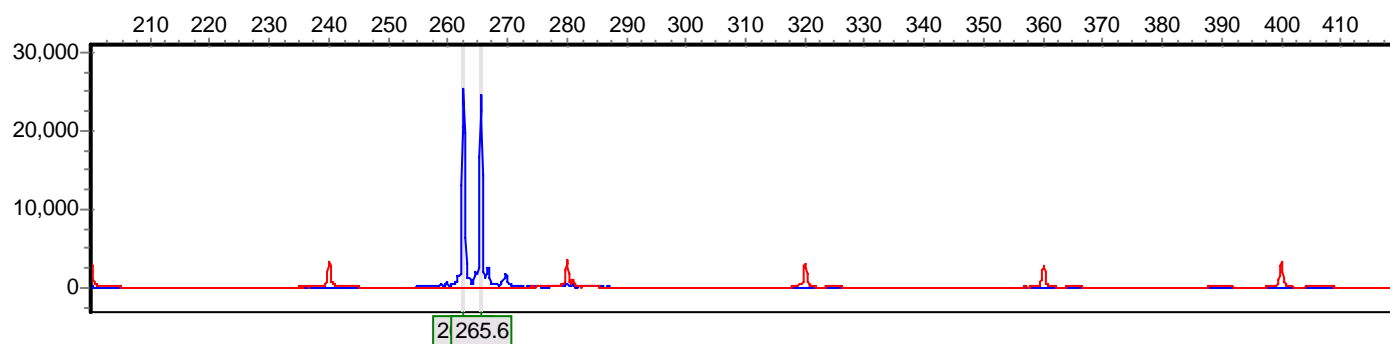

**Sample 22**70\_F09.fsa Run date and time: 01/05/2017 - 08:54:22 -> 01/05/2017 - 09:38:13

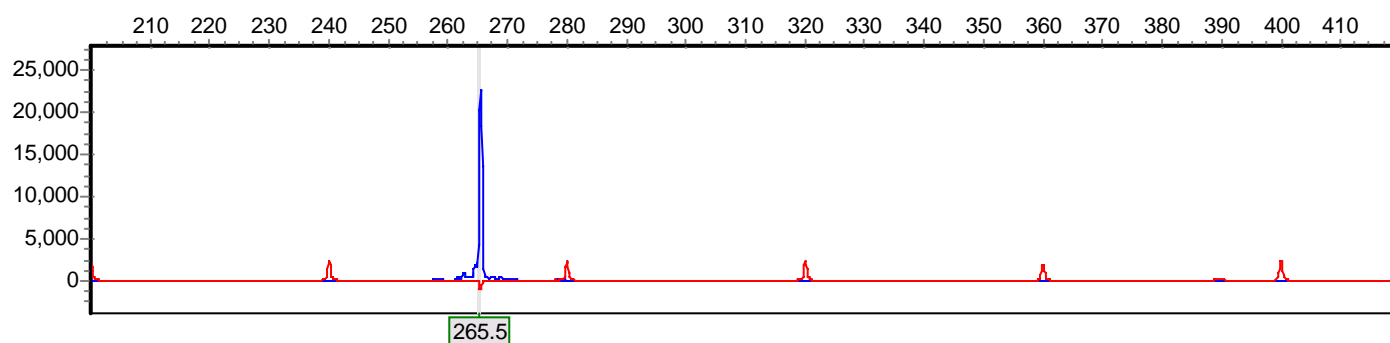

**Sample 23**71\_G09.fsa Run date and time: 01/05/2017 - 08:54:22 -> 01/05/2017 - 09:38:13

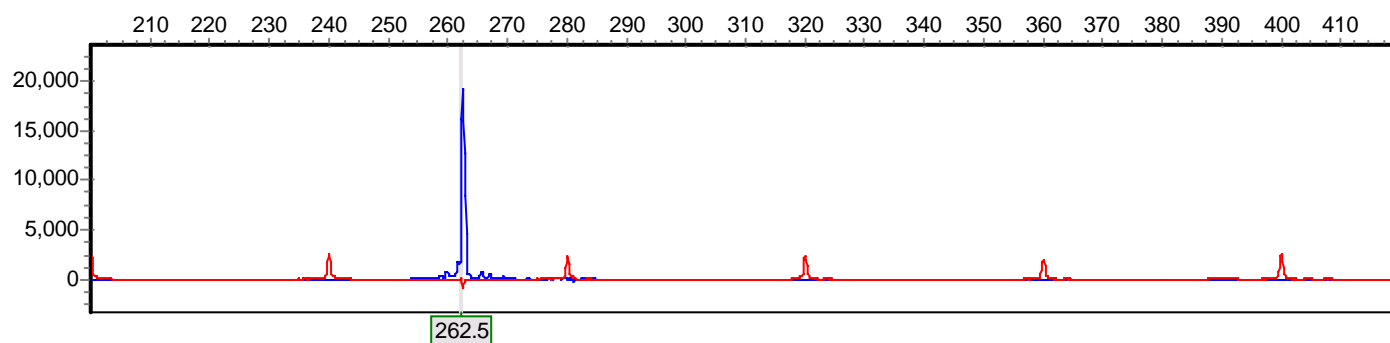

**Sample 24**72\_H09.fsa Run date and time: 01/05/2017 - 08:54:22 -> 01/05/2017 - 09:38:13

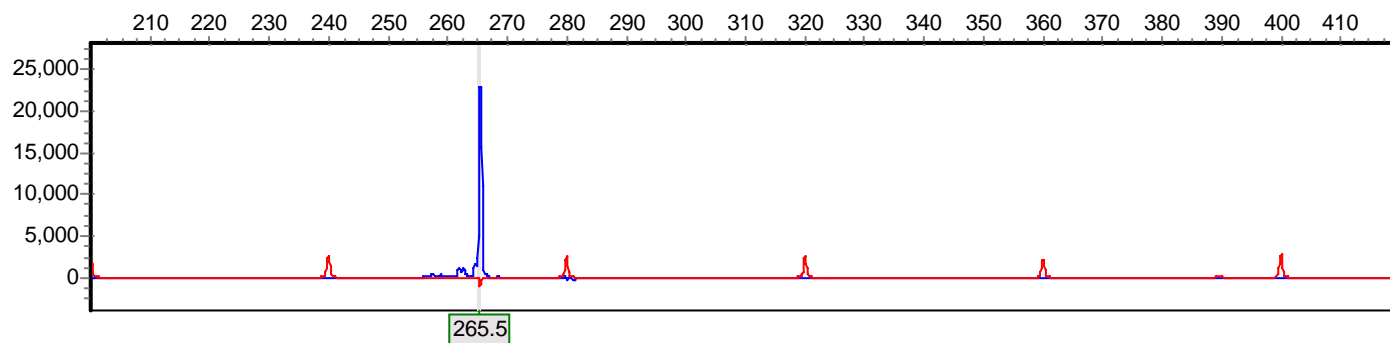

**Sample 25:** 73\_A10.fsa Run date and time: 01/05/2017 - 08:54:22 -> 01/05/2017 - 09:38:13

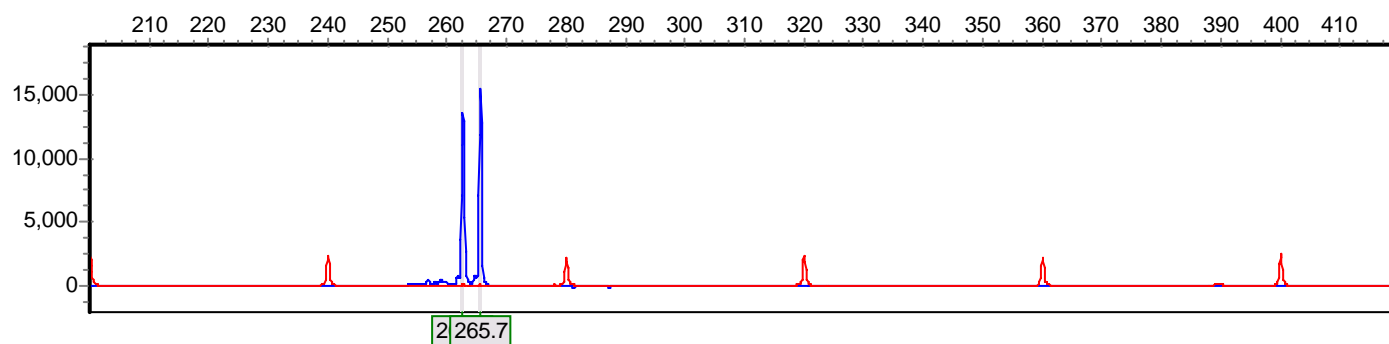

**Sample 26** 74\_B10.fsa Run date and time: 01/05/2017 - 08:54:22 -> 01/05/2017 - 09:38:13

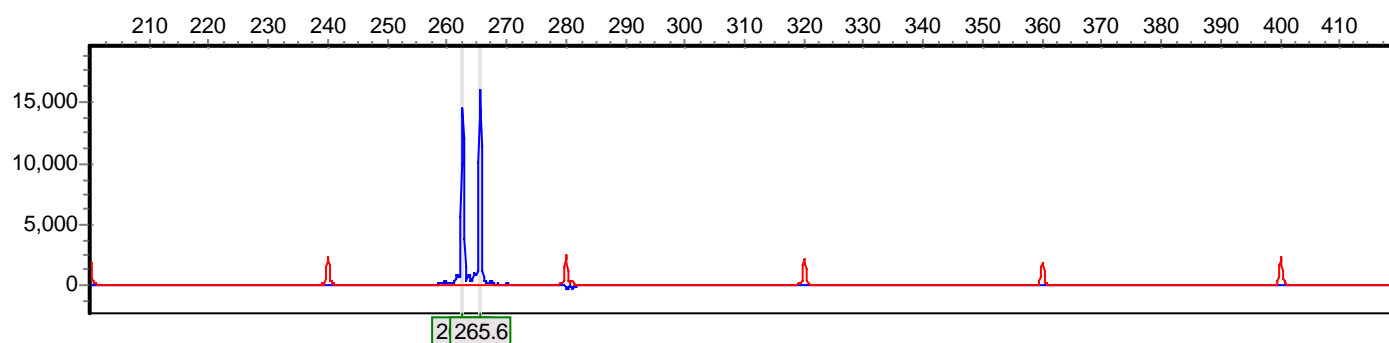

**Sample 27** 5\_C10.fsa Run date and time: 01/05/2017 - 08:54:22 -> 01/05/2017 - 09:38:13

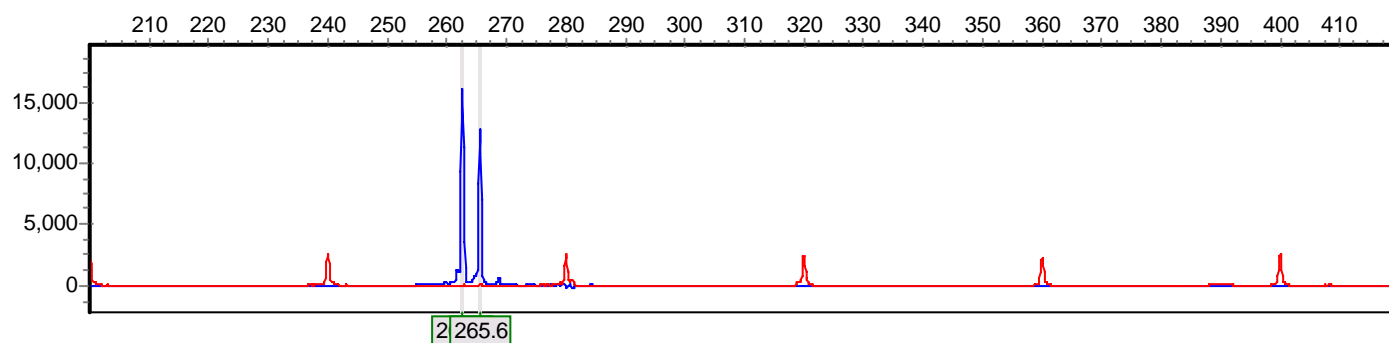

**Sample 28** 76\_D10.fsa Run date and time: 01/05/2017 - 08:54:22 -> 01/05/2017 - 09:38:13

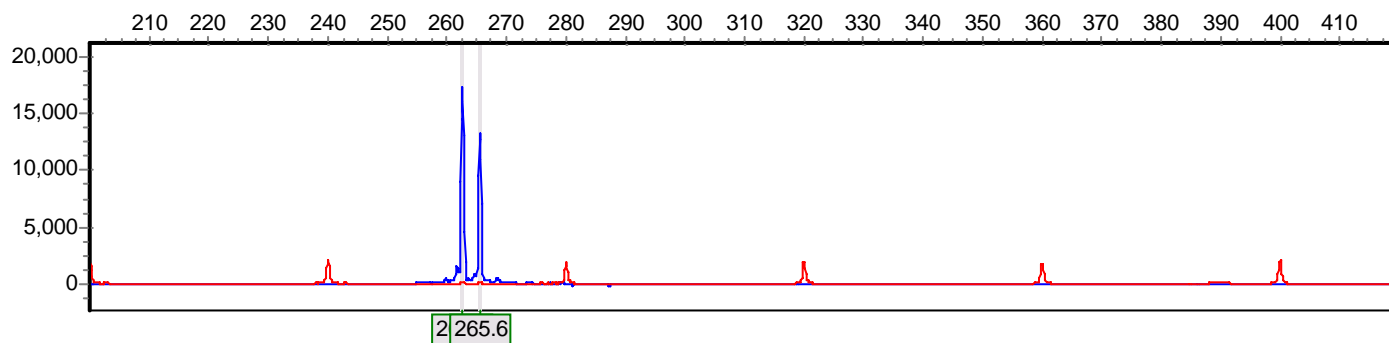

Sample 29: 77\_E10.fsa    Run date and time: 01/05/2017 - 08:54:22 -> 01/05/2017 - 09:38:13

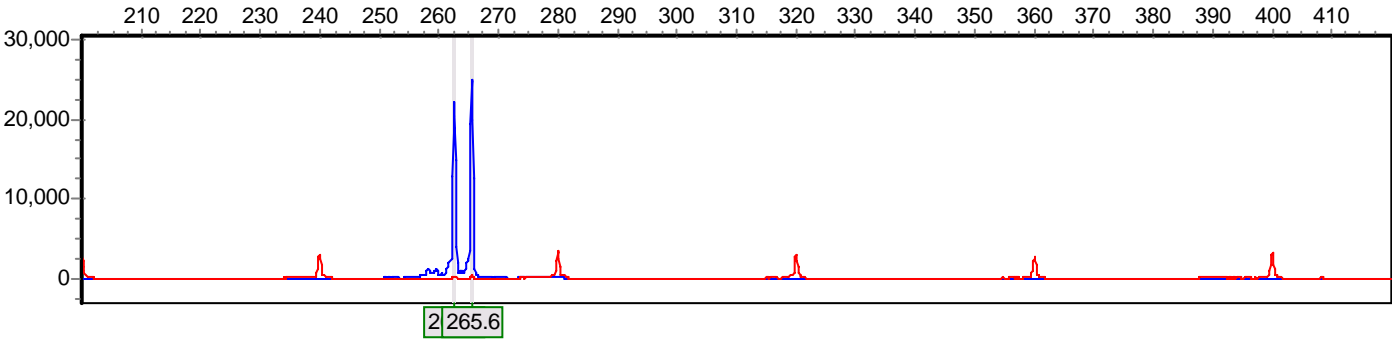

Sample 30: 78\_F10.fsa    Run date and time: 01/05/2017 - 08:54:22 -> 01/05/2017 - 09:38:13

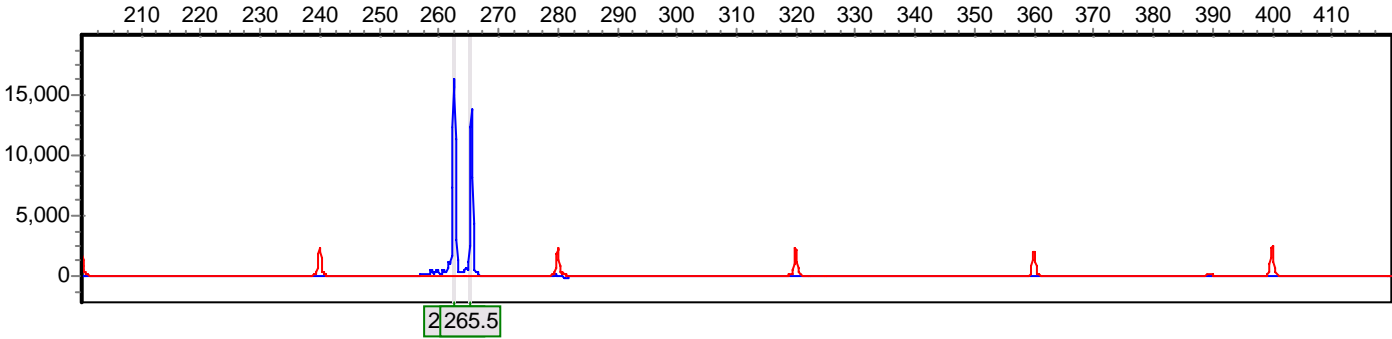

Sample 31: 79\_G10.fsa    Run date and time: 01/05/2017 - 08:54:22 -> 01/05/2017 - 09:38:13

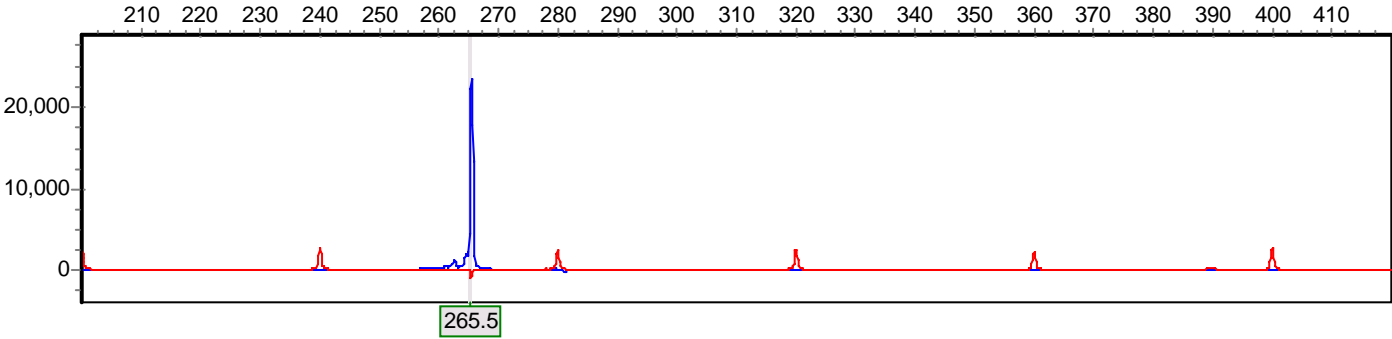

Sample 32: 80\_H10.fsa    Run date and time: 01/05/2017 - 08:54:22 -> 01/05/2017 - 09:38:13

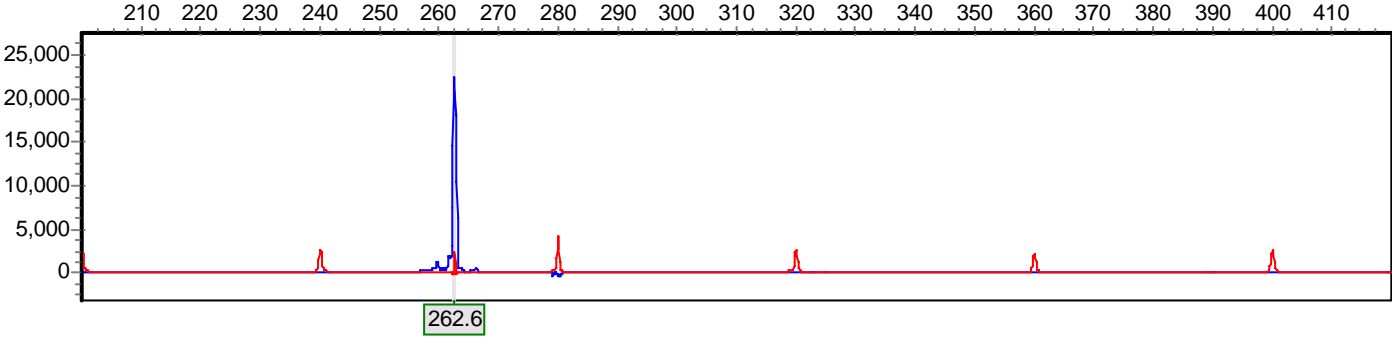



**Sample 33:** 81\_A11.fsa Run date and time: 01/05/2017 - 08:54:22 -> 01/05/2017 - 09:38:13

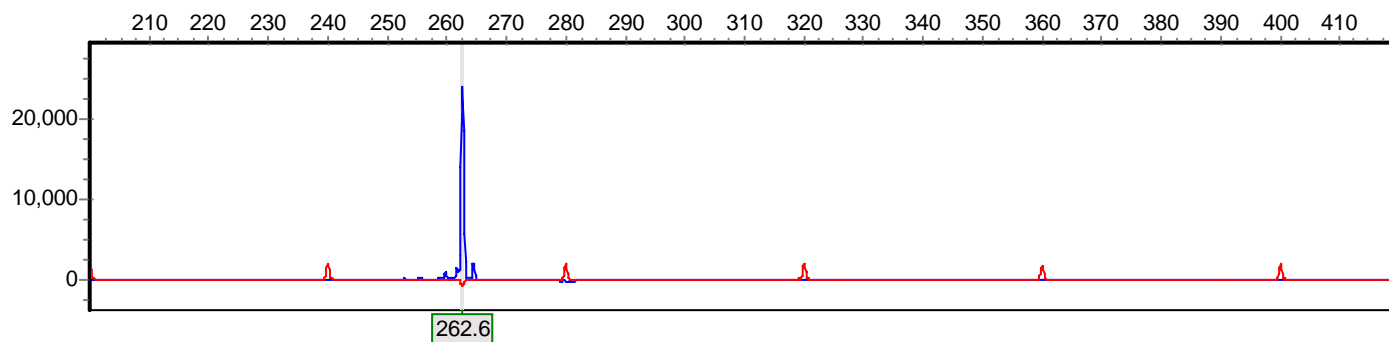

**Sample 34**82\_B11.fsa Run date and time: 01/05/2017 - 08:54:22 -> 01/05/2017 - 09:38:13

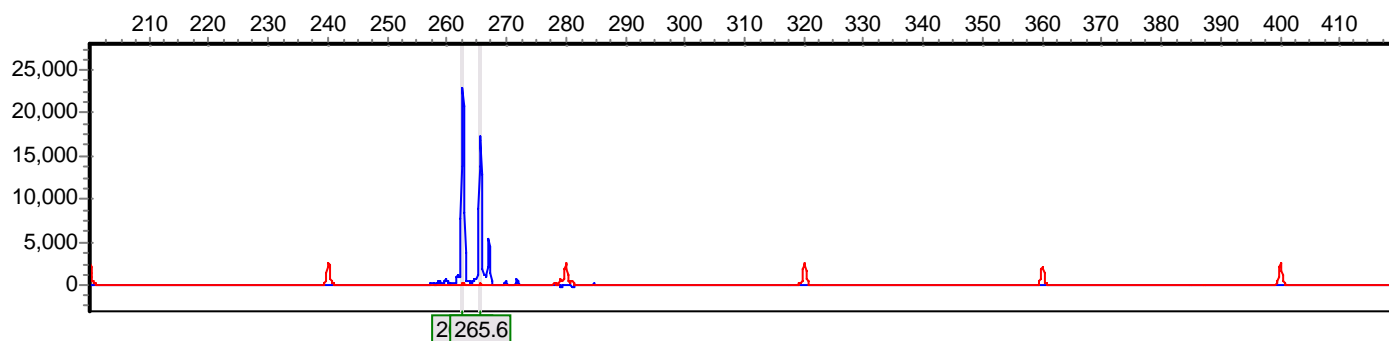

**Sample 35**83\_C11.fsa Run date and time: 01/05/2017 - 08:54:22 -> 01/05/2017 - 09:38:13

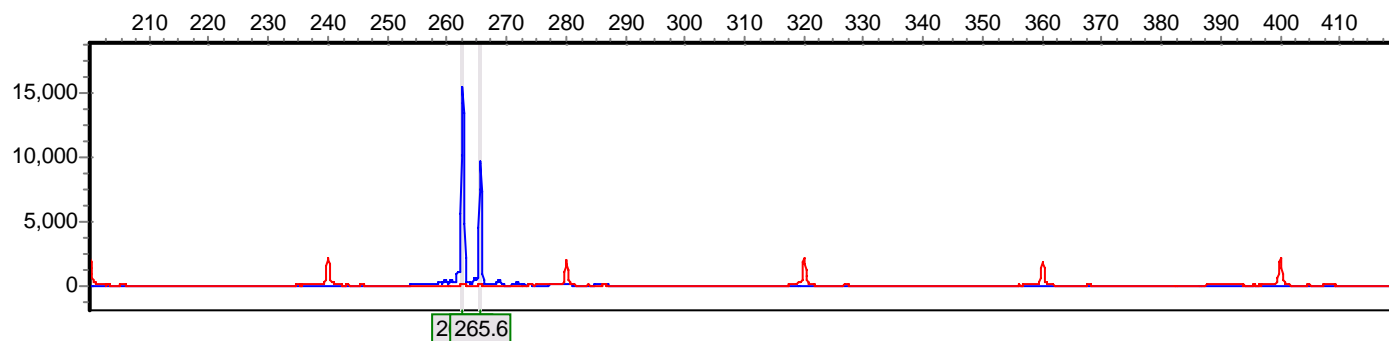

**Sample 36**84\_D11.fsa Run date and time: 01/05/2017 - 08:54:22 -> 01/05/2017 - 09:38:13

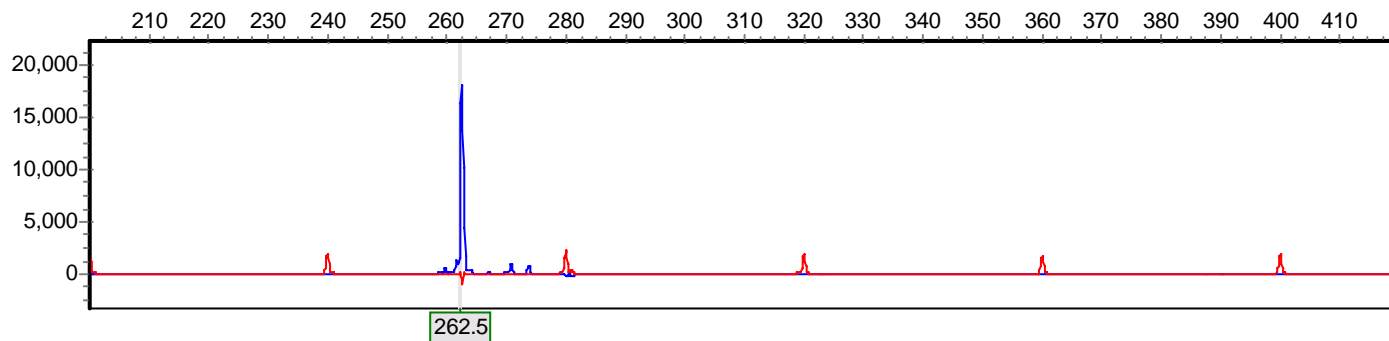

**Sample 37:** 85\_E11.fsa Run date and time: 01/05/2017 - 08:54:22 -> 01/05/2017 - 09:38:13

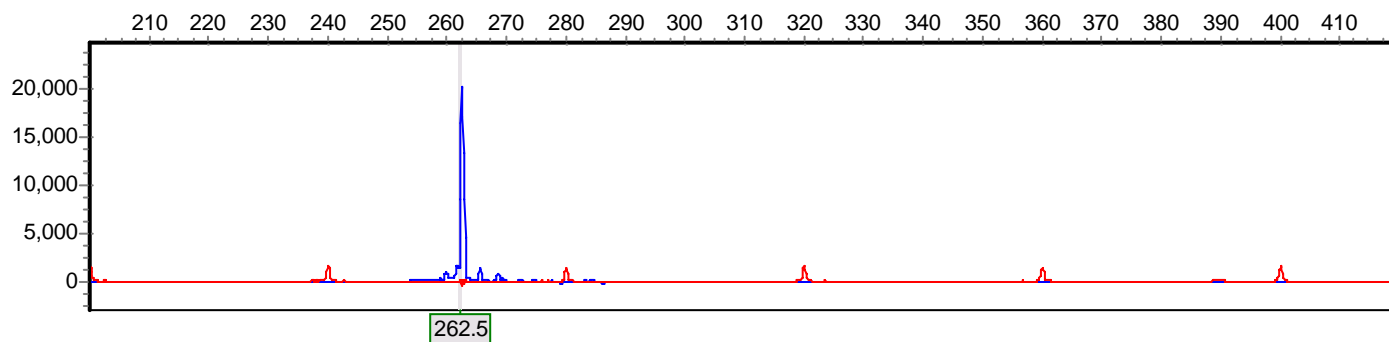

**Sample 38**86\_F11.fsa Run date and time: 01/05/2017 - 08:54:22 -> 01/05/2017 - 09:38:13

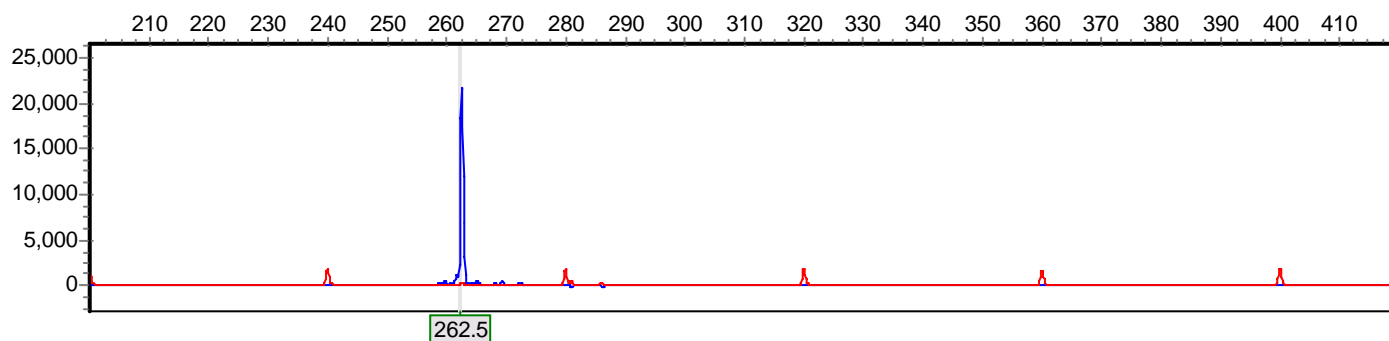

**Sample 39**87\_G11.fsa Run date and time: 01/05/2017 - 08:54:22 -> 01/05/2017 - 09:38:13

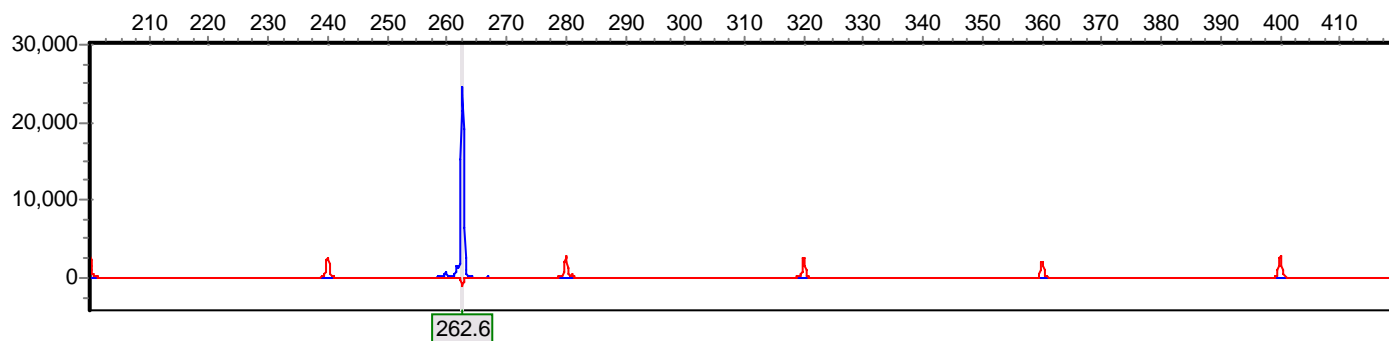

**Sample 40**88\_H11.fsa Run date and time: 01/05/2017 - 08:54:22 -> 01/05/2017 - 09:38:13

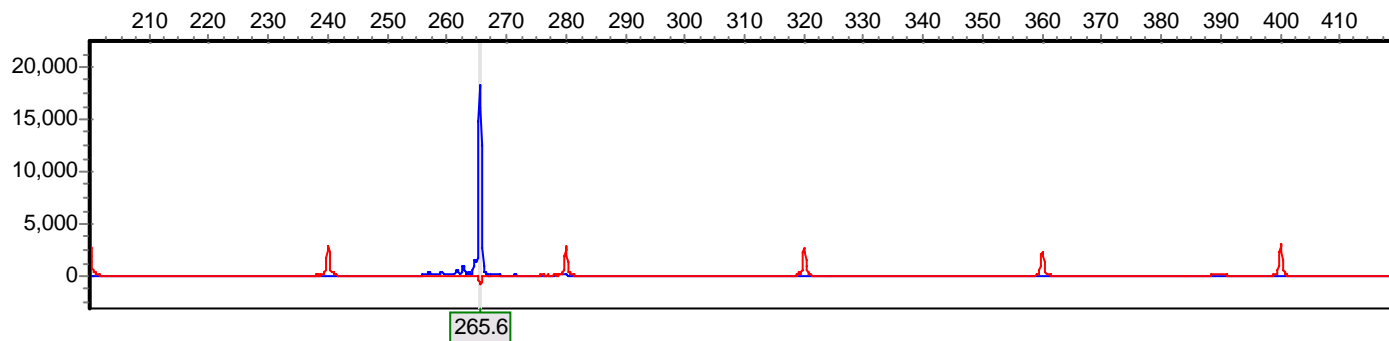

Sample 41: 89\_A12.fsa    Run date and time: 01/05/2017 - 08:54:22 -> 01/05/2017 - 09:38:13

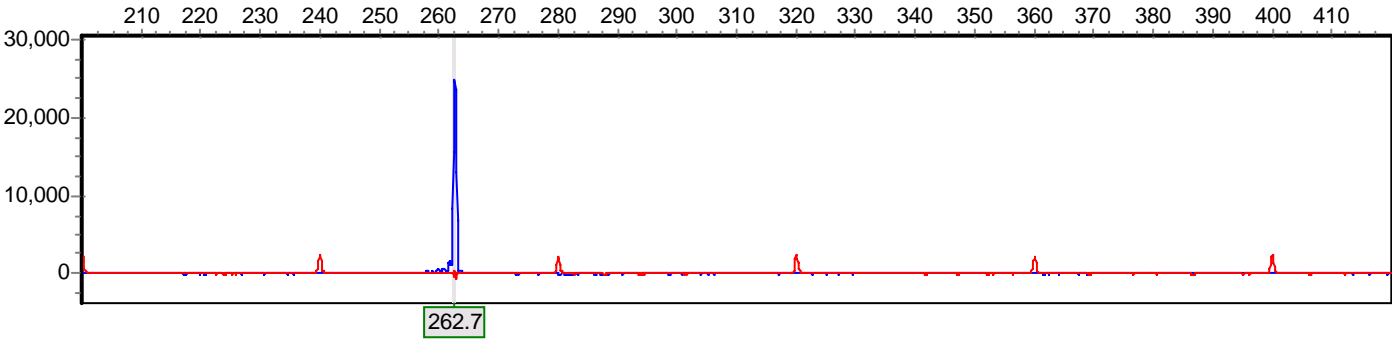

Sample 4290\_B12.fsa    Run date and time: 01/05/2017 - 08:54:22 -> 01/05/2017 - 09:38:13

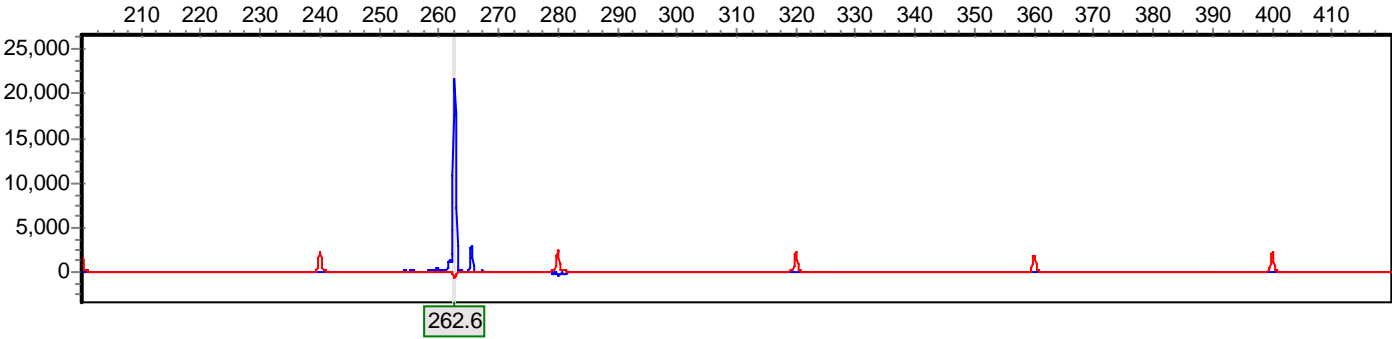

Sample 4391\_C12.fsa    Run date and time: 01/05/2017 - 08:54:22 -> 01/05/2017 - 09:38:13

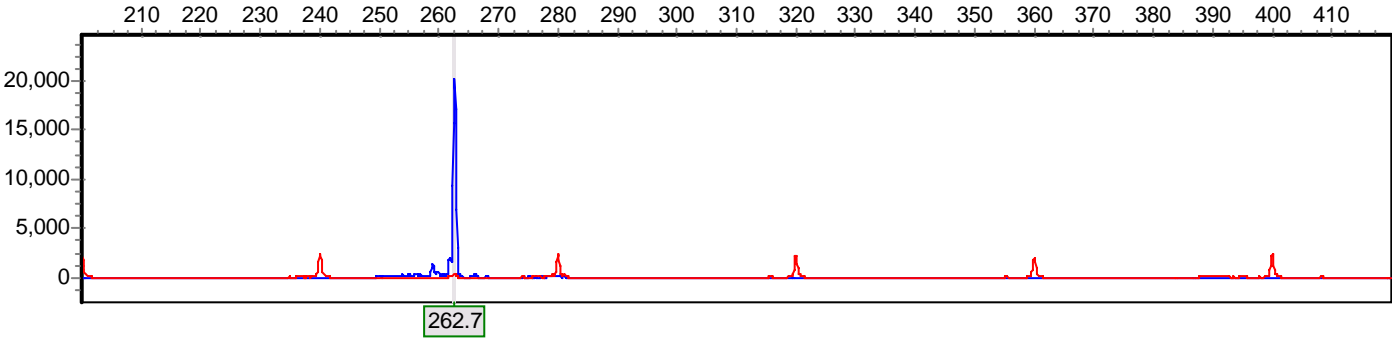

Sample 4492\_D12.fsa    Run date and time: 01/05/2017 - 08:54:22 -> 01/05/2017 - 09:38:13

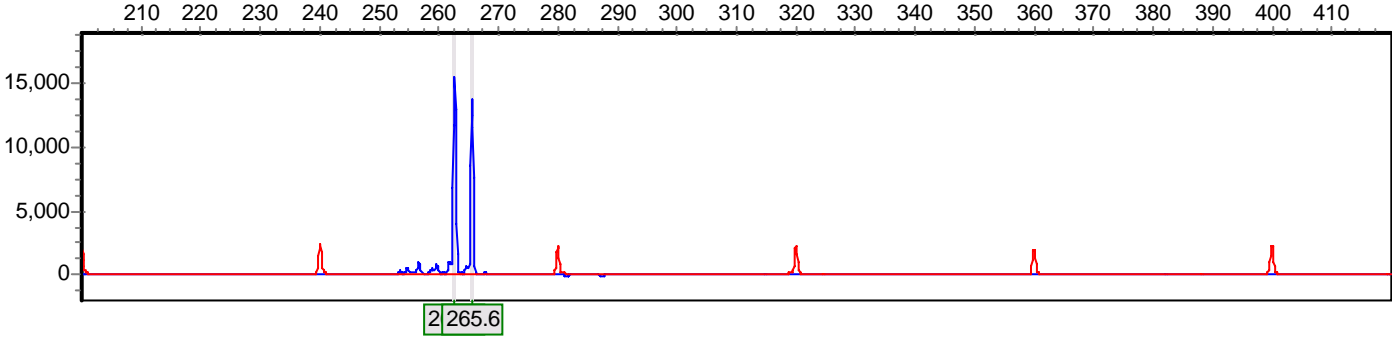

**Sample 45:** 93\_E12.fsa Run date and time: 01/05/2017 - 08:54:22 -> 01/05/2017 - 09:38:13

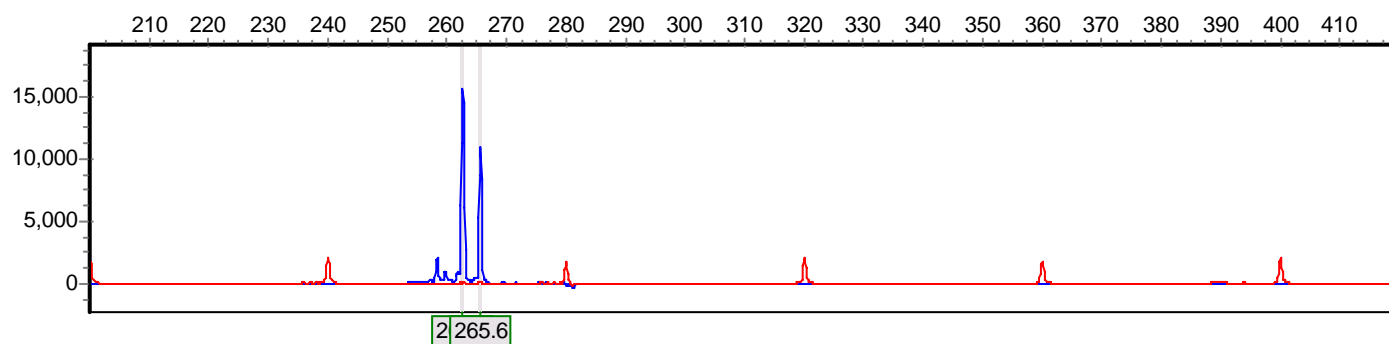

**Sample 46**94\_F12.fsa Run date and time: 01/05/2017 - 08:54:22 -> 01/05/2017 - 09:38:13

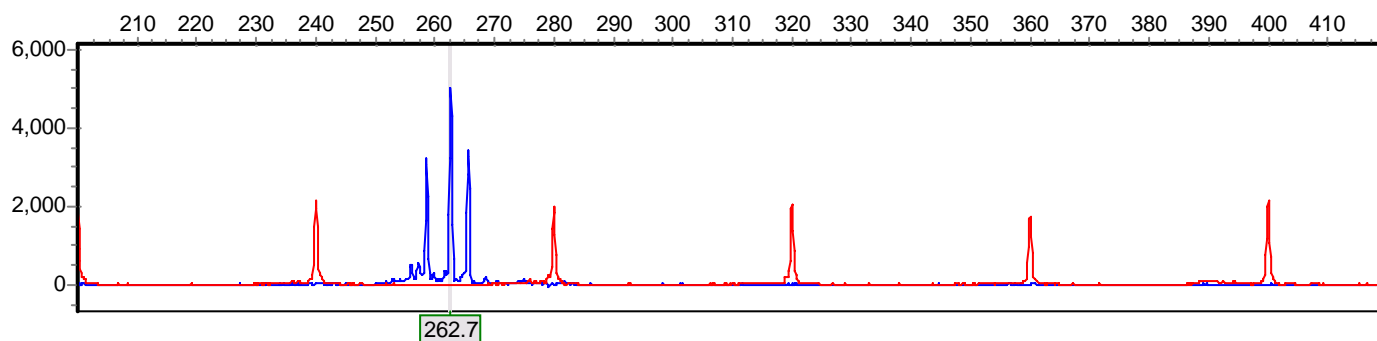

**Sample 47**H100.fsa Run date and time: 12/31/2016 - 12:23:44 -> 12/31/2016 - 13:07:04

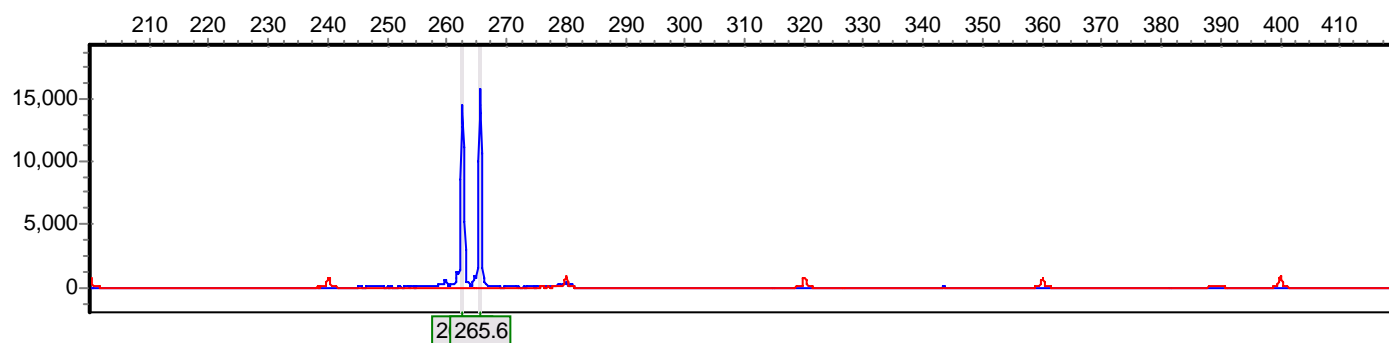

**Sample 48**H102.fsa Run date and time: 12/31/2016 - 12:23:44 -> 12/31/2016 - 13:07:04

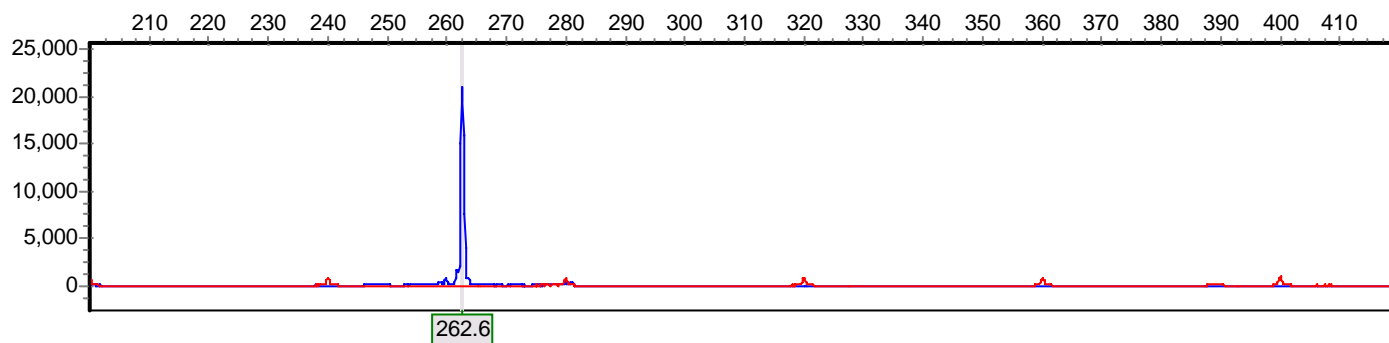

**Sample 49:** H106.fsa Run date and time: 12/31/2016 - 12:23:44 -> 12/31/2016 - 13:07:04

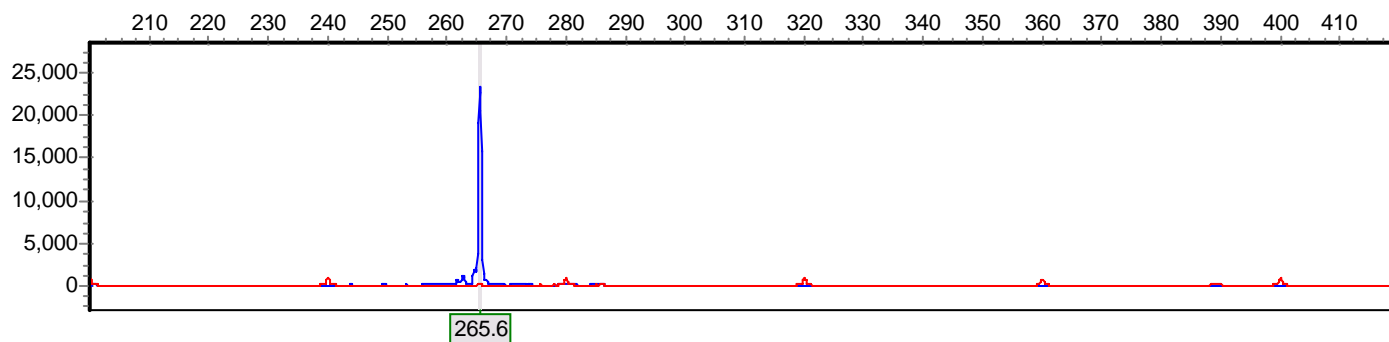

**Sample 50**H107.fsa Run date and time: 12/31/2016 - 12:23:44 -> 12/31/2016 - 13:07:04

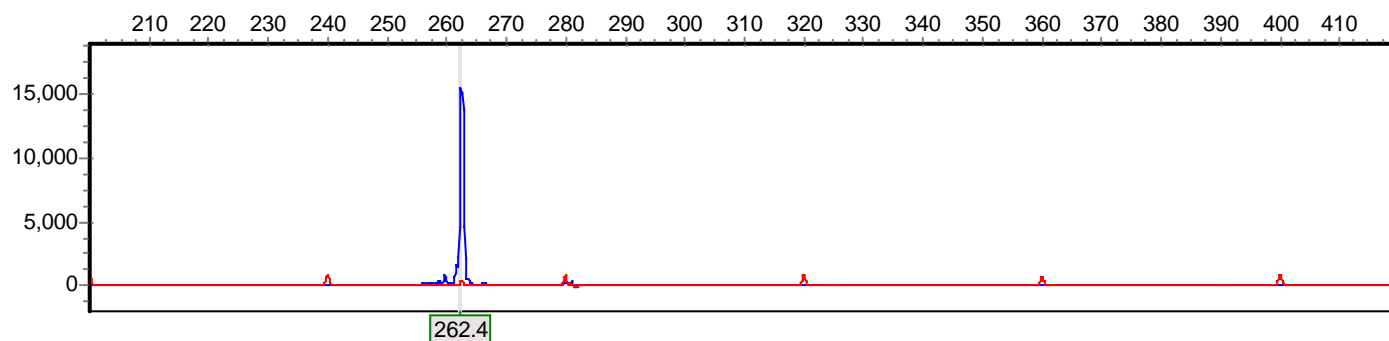

**Sample 51**H108.fsa Run date and time: 12/31/2016 - 12:23:44 -> 12/31/2016 - 13:07:04

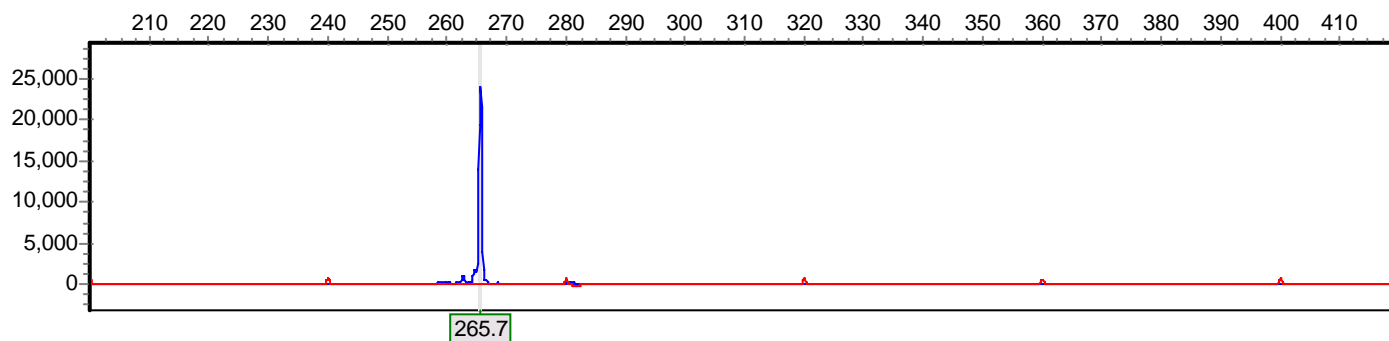

**Sample 52**H110.fsa Run date and time: 12/31/2016 - 12:23:44 -> 12/31/2016 - 13:07:04

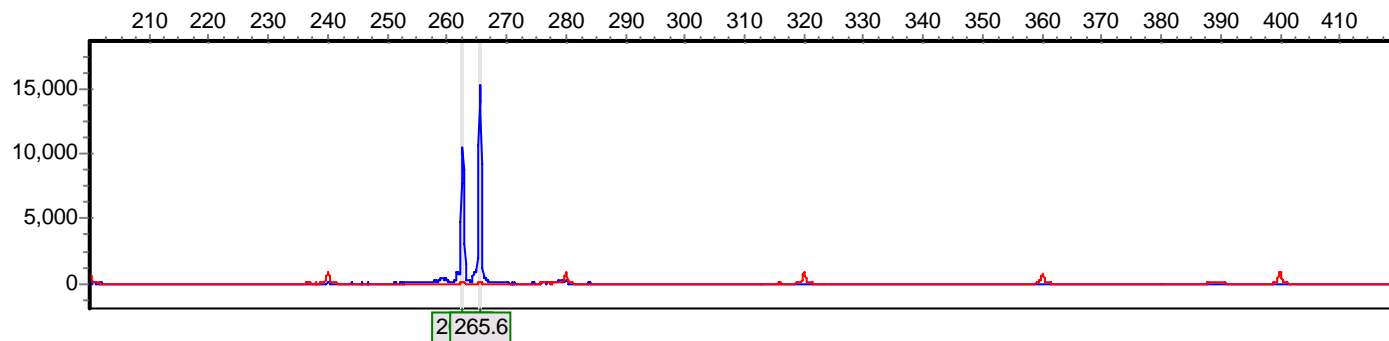

Sample 53: H111.fsa    Run date and time: 12/31/2016 - 12:23:44 -> 12/31/2016 - 13:07:04

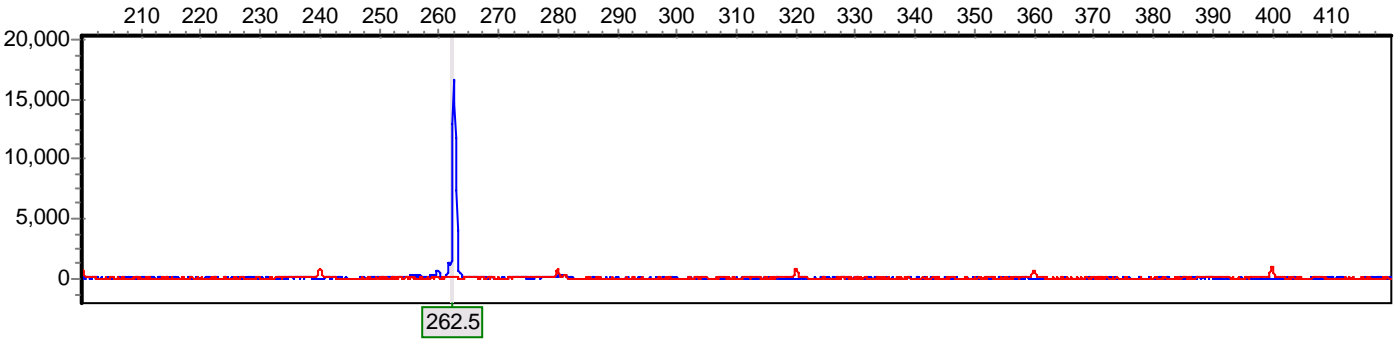

Supplement: s1 [file s1]
